# Supplementary material for: Whole Genome Analysis of SNV and Indel Polymorphism in Common Marmosets (Callithrix jacchus)
Source: Genes (Basel). 2023 Dec 7;14(12):2185. doi: 10.3390/genes14122185 (PMC10742769; doi:10.3390/genes14122185)
Supplement: Supplementary file 1 [file genes-14-02185-s001.zip › marmoset.paper.supplemental.tables.v2.xlsx]

## Sheet: Table S1. Marmoset Samples Sequ
Table S1. Marmoset Samples Sequenced
DNA ID	NPRC Source	Animal Origin	nRefHom	nNonRefHom	nHets	nTransitions	nTransversions	average depth	nSingletons	nMissing
102620	WNPRC	WNPRC	14063873	1424662	3569584	3276025	1684802	36.5	26810	79079
102621	WNPRC	WNPRC	15002397	1049499	3007157	2653558	1377535	31.3	20204	78145
102622	WNPRC	SNPRC	13555765	1562199	3937156	3602858	1862033	36.3	5499	82078
102623	WNPRC	WNPRC/NEPRC	13507169	1558514	3984271	3634237	1874792	33.3	4516	87244
102624	WNPRC	WNPRC	14297308	1431780	3321745	3112289	1611568	28.7	16812	86365
102625	WNPRC	Defence Science and Technology Laboratory, United Kingdom	13579382	1708638	3737781	3571259	1840895	31.2	42798	111397
102626	WNPRC	Defence Science and Technology Laboratory, United Kingdom	13710272	1772427	3570322	3501125	1807701	31.5	28489	84177
102627	WNPRC	Defence Science and Technology Laboratory, United Kingdom	13591037	1724483	3726225	3573595	1843105	32	14416	95453
102628	WNPRC	Defence Science and Technology Laboratory, United Kingdom	13569000	1823302	3637452	3575602	1850759	34.1	24155	107444
102629	SNPRC	SNPRC	13619203	1679172	3733438	3549560	1829265	34.1	15993	105385
102630	SNPRC	SNPRC	13734661	1548992	3754810	3476202	1794874	30	20810	98735
102631	SNPRC	SNPRC	13624884	1675629	3716332	3534830	1823504	32.1	29738	120353
102632	SNPRC	SNPRC	13755830	1678219	3611958	3466936	1790437	32.5	15975	91191
102924	WNPRC	NEPRC	12958456	1785060	4302123	3995869	2053961	44.6	8005	91559
102925	WNPRC	WNPRC/NEPRC	13395753	1531297	4128402	3712552	1912681	37	23872	81746
102926	WNPRC	WNPRC/SNPRC	13423423	1104416	4551169	3712999	1909036	37.8	5730	58190
102927	WNPRC	SNPRC/NEPRC	13211056	1724417	4118434	3833356	1973990	40.1	1536	83291
102928	WNPRC	WNPRC	14152634	1608066	3274771	3197687	1654989	37.2	18245	101727
102929	WNPRC	WNPRC/SNPRC	14480361	1272761	3305091	3000020	1548700	35.8	6095	78985
102930	WNPRC	NEPRC	13061727	1849698	4116526	3917175	2012076	37.4	5633	109247
102931	WNPRC	WNPRC/SNPRC	14069367	1439446	3546761	3268484	1687282	38.3	3633	81624
102932	WNPRC	NEPRC	12901210	1810294	4327814	4028610	2072112	36.2	21556	97880
102934	WNPRC	WNPRC/SNPRC	13957679	1473615	3610050	3328959	1723866	35.8	1149	95854
102935	WNPRC	WNPRC	14787615	1288468	2978203	2794375	1445229	36.2	11817	82912
102936	WNPRC	SNPRC	13551006	1634693	3856215	3598303	1858306	37.9	10059	95284
102939	WNPRC	Defence Science and Technology Laboratory, United Kingdom	13605214	1829763	3594367	3561377	1828652	34.4	23924	107854
102940	WNPRC	Defence Science and Technology Laboratory, United Kingdom	13642159	1683092	3709855	3535169	1823451	34.3	29142	102092
102941	WNPRC	NEPRC	13147134	1794134	4088900	3862776	1983601	36.1	21005	107030
102942	WNPRC	NEPRC	13103423	1788445	4129043	3883877	1997494	34.4	5946	116287
102943	WNPRC	SNPRC	13494880	1642474	3900130	3635583	1873110	30.1	7034	99714
102944	WNPRC	WNPRC	14443149	1416602	3185339	3009144	1564020	33.3	13985	92108
102945	WNPRC	SNPRC	13475524	1584093	3987656	3651363	1886096	34.9	4159	89925
102946	WNPRC	WNPRC	14294620	1440312	3303633	3105029	1609958	33.9	3251	98633
102947	WNPRC	WNPRC/SNPRC	14065253	1501763	3482570	3269076	1684493	31.7	12091	87612
102948	WNPRC	NEPRC	12932405	1956634	4125516	3996014	2049151	29.2	118943	122643
102949	WNPRC	WNPRC	14049843	1449341	3545185	3272825	1690460	34.4	12315	92829
102950	WNPRC	Defence Science and Technology Laboratory, United Kingdom	13493566	1694219	3850219	3635037	1874562	31.6	98763	99194
102951	WNPRC	Defence Science and Technology Laboratory, United Kingdom	13635975	1651698	3754982	3543560	1829579	33.8	11628	94543
102952	WNPRC	NEPRC	13112787	1894760	4023642	3882457	1999491	33.1	13654	106009
103103	WNPRC	WNPRC	14169528	1422594	3467750	3206999	1652855	34.6	82379	77326
103104	WNPRC	Defence Science and Technology Laboratory, United Kingdom	13534122	1729587	3752553	3595568	1851661	32.1	37121	120936
103105	WNPRC	WNPRC	14247609	1507877	3283849	3144681	1616794	34.7	9422	97863
103106	WNPRC	WNPRC/NEPRC	13558380	1600494	3856434	3586925	1836259	32.5	18751	121890
103107	WNPRC	WNPRC/SNPRC	14150406	1283393	3612660	3207196	1657473	34.1	6663	90739
103108	WNPRC	WNPRC/NEPRC	13561248	1538064	3924184	3584814	1843664	33.1	8977	113702
103109	WNPRC	WNPRC/NEPRC	13314023	1606433	4115711	3757610	1929581	33.8	7285	101031
103110	WNPRC	WNPRC/NEPRC	14012531	1220402	3809766	3301007	1697583	32.5	77038	94499
103111	WNPRC	WNPRC/SNPRC	13955611	1491449	3598054	3335985	1721554	33.3	19789	92084
103112	WNPRC	NEPRC	12803382	1893142	4342450	4092282	2105024	35.2	32400	98224
103113	WNPRC	Defence Science and Technology Laboratory, United Kingdom	13396683	1684235	3960454	3698676	1910630	34.5	66700	95826
103114	WNPRC	Defence Science and Technology Laboratory, United Kingdom	13492086	1756531	3792486	3637023	1877670	32.8	9199	96095
103115	WNPRC	Defence Science and Technology Laboratory, United Kingdom	13556215	1718930	3773687	3598812	1859260	33.7	21381	88366
103116	WNPRC	NEPRC	12752492	1884097	4398341	4122684	2121640	33.6	7703	102268
103117	WNPRC	WNPRC/NEPRC/SNPRC	13435574	1581743	4029578	3677488	1898854	37.7	10604	90303
103842	SNPRC	SNPRC/NEPRC	13259722	1679341	4105623	3795051	1954580	33.6	23719	92512
103844	SNPRC	SNPRC	13479364	1687639	3879404	3649488	1883920	32.4	10748	90791
103845	SNPRC	SNPRC	13796885	1658441	3584572	3435074	1775752	33.1	30345	97300
103846	SNPRC	NEPRC	13088628	1782282	4166191	3900865	2010963	35.1	41454	100097
103847	SNPRC	NEPRC	13049987	1907000	4078006	3924847	2023575	33.5	33536	102205
103848	SNPRC	SNPRC	14116449	1521572	3401764	3226185	1665756	32.7	32805	97413
103849	SNPRC	SNPRC	13507513	1687764	3850467	3629615	1874609	34	27406	91454
103852	SNPRC	NEPRC	13031552	1844168	4161792	3935526	2033384	33.7	41622	99686
103856	SNPRC	SNPRC	13522284	1611533	3916838	3620665	1873620	35.2	50593	86543
103857	SNPRC	SNPRC	13923508	1585180	3526637	3350319	1729818	31.1	28714	101873
103858	SNPRC	SNPRC	13643249	1618799	3782111	3539387	1828482	31.9	14676	93039
103861	SNPRC	SNPRC/NEPRC	13310103	1714932	4019450	3758439	1941047	34.5	15774	92713
103864	SNPRC	SNPRC	13753480	1721633	3556635	3458121	1787732	29.8	22821	105450
103865	SNPRC	SNPRC	13615274	1663711	3760735	3554303	1837997	30	21612	97478
103866	SNPRC	SNPRC	13795315	1689510	3561802	3441290	1777593	33	34137	90571
103867	SNPRC	SNPRC	13655954	1630624	3757414	3532595	1822482	33.2	24989	93206
103870	SNPRC	NEPRC	12996981	1982603	4055677	3961477	2040010	34.5	42193	101937
103871	SNPRC	SNPRC	13596419	1613957	3833746	3568855	1845463	31.6	27890	93076
103877	SNPRC	SNPRC	13712245	1451421	3891925	3498297	1811994	34.1	42811	81607
104116	WNPRC	NEPRC	12971479	1850953	4207857	3972800	2049483	43.9	69878	106909
104117	WNPRC	SNPRC	13706519	1650397	3677004	3491222	1804177	37.3	3934	103278
104118	WNPRC	Defence Science and Technology Laboratory, United Kingdom	13644478	1615934	3772417	3529462	1825616	37.5	37462	104369
104119	WNPRC	Defence Science and Technology Laboratory, United Kingdom	13501360	1739697	3799233	3632274	1873028	38.5	25361	96908
104120	WNPRC	Defence Science and Technology Laboratory, United Kingdom	13419269	1733312	3887087	3682091	1904418	36.7	34621	97530
104121	WNPRC	Defence Science and Technology Laboratory, United Kingdom	13834698	1664373	3526872	3406163	1753058	33.2	50478	111255
104122	WNPRC	Defence Science and Technology Laboratory, United Kingdom	13690030	1770567	3569394	3498938	1807846	32	38442	107207
104123	WNPRC	Defence Science and Technology Laboratory, United Kingdom	13465762	1711477	3868199	3653626	1891985	33.2	28237	91760
104124	WNPRC	NEPRC	13334756	1978129	3696510	3722797	1916915	34	21715	127803
104125	WNPRC	NEPRC	13173867	1773814	4075808	3836077	1978629	33.5	7458	113709
104126	WNPRC	WNPRC	13811511	1550311	3631368	3394161	1756160	35.6	29432	144008

## Sheet: Table S2. Assembly Metrics
Table S2. Representative assembly metrics for sequenced marmoset genomes.
		Assembled size (Mb)*	Total contigs	N50 contig length (Mb)	N50 scaffold length (Mb)
Species	Assembled version					Unplaced (Mb)
Callithrix jacchus	Callithrix_jacchus_cj1700_1.1	2859	1335	25	98	65
Callithrix jacchus	mCalJac1.2.pat.X	2861	2398	13	137	60
Callithrix jacchus	Callithrix_jacchus-3.2	2752	201371	0.029	5	88
* Ungapped size

## Sheet: Table S3. BUSCO scores
Table S3. BUSCO scores for multiple assembled marmoset genomes.
		% Complete	% Single-copy complete	% Duplicated
Species	Assembled version				% Fragmented	% Missing
Callithrix jacchus	Callithrix_jacchus_cj1700_1.1	98.2	95.6	2.6	0.4	1.4
Callithrix jacchus	mCalJac1.2.pat.X	98.3	95.7	2.6	0.5	1.2
Callithrix jacchus	Callithrix_jacchus-3.2	96.9	93.4	3.5	1.4	1.6
BUSCO 4.0.2; primates_odb10 (n=13,780)

## Sheet: Table S4. Gene Annotation Metri
Table S4. Representative gene annotation metrics for sequenced marmoset genomes.
		Protein-coding genes	Total ncRNA	mRNAs
Species	Assembled version
Callithrix jacchus	Callithrix_jacchus_cj1700_1.1	22,252 NCBI	11509	85120
Callithrix jacchus	mCalJac1.2.pat.X	22,355 NCBI; 22,078 Ensembl	11142	83154
Callithrix jacchus	Callithrix_jacchus-3.2	20,871 NCBI; 17,353 Ensembl	6925	45251

## Sheet: Table S5. SNV Summary Stats
Table S5. SNV Summary Stats
samples	84
SNVs	19137198
multiallelic SNVs	378827
singletons	2078752
Ts/Tv	1.92
average sequencing depth	34.2107
average SNVs per individual	5.42765e+06
average heterozygosity	0.00132558
reciprocal liftOver to hg38	11872309	0.620379
VEP Consequences based on NCBI RefSeq gene models
[Consequences (most severe)]
splice_donor_variant	738
splice_acceptor_variant	557
stop_gained	1366
stop_lost	278
start_lost	323
missense_variant	74088
splice_region_variant	14810
synonymous_variant	68779
stop_retained_variant	75
coding_sequence_variant	17
5_prime_UTR_variant	84472
3_prime_UTR_variant	151453
non_coding_transcript_exon_variant	140826
intron_variant	8089786
upstream_gene_variant	656256
downstream_gene_variant	587655
intergenic_variant	9265719
TOTAL	19137198

## Sheet: Table S6. Indel Summary Stats
Table S6. Indel Summary Stats
samples	84
Indels 1-6 bp	2816760
multiallelic Indels	541631
singletons	384507
average sequencing depth	30.9512
average Indels per individual	852024
reciprocal liftOver to hg38	1020622	0.362339
VEP Consequences based on NCBI RefSeq gene models
[Consequences (most severe)]
splice_donor_variant	106
splice_acceptor_variant	94
stop_gained	34
frameshift_variant	2773
stop_lost	6
start_lost	9
inframe_insertion	750
inframe_deletion	876
protein_altering_variant	28
splice_region_variant	2297
stop_retained_variant	3
coding_sequence_variant	19
5_prime_UTR_variant	9879
3_prime_UTR_variant	25554
non_coding_transcript_exon_variant	15387
intron_variant	1274287
upstream_gene_variant	108487
downstream_gene_variant	95776
intergenic_variant	1280395
TOTAL	2816760

## Sheet: Table S7 ClinVar Marmoset Stats
Table S7. ClinVar Marmoset Stats
ClinVar orthologous SNVs after liftOver	5561
ClinVar orthologous SNVs after liftOver with same consequence in same gene	4956	0.891207
ClinVar Significance	All SNVs Count	SNVs with same consequence Count
Likely_benign	2379	2147
Uncertain_significance	1456	1274
Benign	993	893
Conflicting_interpretations_of_pathogenicity	419	367
Benign/Likely_benign	253	227
Likely_pathogenic	16	12
Pathogenic	16	11
not_provided	13	13
Pathogenic/Likely_pathogenic	5	4
drug_response	3	2
No CLNSIG tag in vcf	3	1
other	3	3
Affects	1	1
Conflicting_interpretations_of_pathogenicity|other	1	1
	5561	4956
All Pathogenic	37	27

## Sheet: Table S8. ClinVar Details
Table S8. ClinVar Details
marmoset_ID	dbSNP	hg38_chrom	hg38_position	hg38_ref	hg38_alt	marmoset_gene	marmoset_VEP_consequence	AC	AN	AF	NEPRC AF	SNPRC AF	UK AF	WNPRC AF	ClinVar _Significance	ClinVar_Disease	ClinVar_Gene	ClinVar_Consequence	Same Consequence in Same Gene	CADD PHRED
Pathogenic
13:7334434:C:T	rs864321699	8	11708337	G	A	GATA4	missense_variant	3	168	0.0178571	0	0	0.0833	0	Pathogenic	Congenital_heart_disease	GATA4	missense_variant,intron_variant	YES	22.2
15:3504507:T:C	rs577069249	3	180650140	T	C	CCDC39	intron_variant	23	168	0.136905	0.25	0.1	0.1667	0.08	Pathogenic	Primary_ciliary_dyskinesia	CCDC39	intron_variant	YES	0.205
16:51588847:C:T	rs994355873	8	144513679	G	A	RECQL4	stop_gained	1	168	0.00595238	0	0	0.0278	0	Pathogenic	Baller-Gerold_syndrome	RECQL4	stop_gained	YES	35
19:10341384:C:T	rs770329105	1	216078332	G	A	USH2A	missense_variant	14	168	0.0833333	0.2188	0.08	0	0.06	Pathogenic	Usher_syndrome_type_2A|not_provided	USH2A	missense_variant	YES	23.4
22:39820446:C:T	rs80356463	19	45766866	C	T	SIX5	missense_variant	1	168	0.00595238	0	0	0.0278	0	Pathogenic	Branchiootorenal_syndrome_2	SIX5	missense_variant	YES	17.01
2:44720125:C:A	rs191068215	5	147831792	C	A	SPINK1	5_prime_UTR_variant	2	168	0.0119048	0	0.04	0	0	Pathogenic	Tropical_pancreatitis	SPINK1	5_prime_UTR_variant,intron_variant	YES	0.688
4:17947215:G:A	rs104893960	6	10877296	C	T	GCM2	missense_variant	6	168	0.0357143	0.125	0	0	0.04	Pathogenic	Hypoparathyroidism,_familial_isolated,_2	GCM2	missense_variant	YES	23.4
5:96794138:G:A	rs764561297	17	37739468	G	A	HNF1B	synonymous_variant	4	168	0.0238095	0	0	0	0.08	Pathogenic	Maturity_onset_diabetes_mellitus_in_young	HNF1B	synonymous_variant	YES	9.416
7:149491445:G:A	rs606231300	1	112917820	G	A	SLC16A1	stop_gained	39	168	0.232143	0.3438	0.22	0.2222	0.18	Pathogenic	Monocarboxylate_transporter_1_deficiency,_autosomal_dominant	SLC16A1	stop_gained	YES	36
9:68087733:C:T	rs1942608745	12	49026677	G	A	KMT2D	stop_gained	67	168	0.39881	0.4375	0.42	0.3611	0.38	Pathogenic	Kabuki_syndrome|not_provided	KMT2D	stop_gained	YES	45
9:68088117:C:T	rs1942584412	12	49026293	G	A	KMT2D	missense_variant	67	168	0.39881	0.4375	0.42	0.3611	0.38	Pathogenic	Kabuki_syndrome_1|Kabuki_syndrome|not_provided	KMT2D	missense_variant	YES	32
10:29135657:G:A	rs119472028	15	45104176	G	A	DUOX2	missense_variant	1	168	0.00595238	0	0	0.0278	0	Pathogenic	Thyroid_dyshormonogenesis_6|not_provided	DUOX2	stop_gained	NO	40
12:48065552:C:T	.	10	79613898	G	A	SFTPA2	missense_variant	5	168	0.0297619	0	0.02	0.1111	0	Pathogenic	Interstitial_lung_disease_1	SFTPA1	missense_variant	NO	22.5
12:88615668:G:A	rs538274657	10	98431282	G	A	HPS1	missense_variant	3	168	0.0178571	0	0	0.0833	0	Pathogenic	Hermansky-Pudlak_syndrome|not_provided	HPS1	stop_gained,5_prime_UTR_variant,intron_variant	NO	39
16:51588847:C:T	.	8	144513679	G	A	LRRC14	upstream_gene_variant	1	168	0.00595238	0	0	0.0278	0	Pathogenic	Baller-Gerold_syndrome	RECQL4	stop_gained	NO	35
16:51588847:C:T	.	8	144513679	G	A	MFSD3	downstream_gene_variant	1	168	0.00595238	0	0	0.0278	0	Pathogenic	Baller-Gerold_syndrome	RECQL4	stop_gained	NO	35
16:51588847:C:T	.	8	144513679	G	A	RECQL4	non_coding_transcript_exon_variant	1	168	0.00595238	0	0	0.0278	0	Pathogenic	Baller-Gerold_syndrome	RECQL4	stop_gained	NO	35
22:39820446:C:T	rs80356463	19	45766866	C	T	DMPK	downstream_gene_variant	1	168	0.00595238	0	0	0.0278	0	Pathogenic	Branchiootorenal_syndrome_2	SIX5	missense_variant	NO	17.01
22:39820446:C:T	rs80356463	19	45766866	C	T	MEIOSIN	downstream_gene_variant	1	168	0.00595238	0	0	0.0278	0	Pathogenic	Branchiootorenal_syndrome_2	SIX5	missense_variant	NO	17.01
3:176627261:C:T	rs530749007	4	15989758	G	A	PROM1	missense_variant	1	168	0.00595238	0	0	0	0.02	Pathogenic	Retinitis_pigmentosa_41|not_provided	PROM1	stop_gained	NO	36
7:149491445:G:A	rs606231300	1	112917820	G	A	LOC118143373	upstream_gene_variant	39	168	0.232143	0.3438	0.22	0.2222	0.18	Pathogenic	Monocarboxylate_transporter_1_deficiency,_autosomal_dominant	SLC16A1	stop_gained	NO	36
9:111106043:C:T	rs751962801	12	110640437	C	T	TCTN1	intron_variant&non_coding_transcript_variant	4	168	0.0238095	0	0.04	0.0556	0	Pathogenic	Joubert_syndrome_13	TCTN1	stop_gained,non-coding_transcript_variant	NO	33
9:111106043:C:T	rs751962801	12	110640437	C	T	TCTN1	missense_variant	4	168	0.0238095	0	0.04	0.0556	0	Pathogenic	Joubert_syndrome_13	TCTN1	stop_gained,non-coding_transcript_variant	NO	33
9:111106043:C:T	rs751962801	12	110640437	C	T	TCTN1	non_coding_transcript_exon_variant	4	168	0.0238095	0	0.04	0.0556	0	Pathogenic	Joubert_syndrome_13	TCTN1	stop_gained,non-coding_transcript_variant	NO	33
Pathogenic/Likely_pathogenic
14:36823751:C:T	rs1057521141	2	71679197	C	T	DYSF	missense_variant	4	168	0.0238095	0.0625	0	0.0556	0	Pathogenic/Likely_pathogenic	Autosomal_recessive_limb-girdle_muscular_dystrophy_type_2B|Qualitative_or_quantitative_defects_of_dysferlin|not_provided	DYSF	missense_variant	YES	25.7
5:65779382:G:A	rs104894553	17	3476371	G	A	ASPA	missense_variant	84	168	0.5	0.5	0.5	0.5	0.5	Pathogenic/Likely_pathogenic	Spongy_degeneration_of_central_nervous_system|Mild_Canavan_disease|Inborn_genetic_diseases|not_provided	ASPA	missense_variant,intron_variant	YES	32
9:68087587:G:A	rs886041404	12	49026823	C	T	KMT2D	missense_variant	66	166	0.39759	0.4333	0.42	0.3611	0.38	Pathogenic/Likely_pathogenic	Kabuki_syndrome_1|Kabuki_syndrome|not_provided	KMT2D	missense_variant	YES	28.3
9:68087980:G:A	rs267607237	12	49026430	C	T	KMT2D	missense_variant	67	168	0.39881	0.4375	0.42	0.3611	0.38	Pathogenic/Likely_pathogenic	Kabuki_syndrome_1|Kabuki_syndrome|not_provided	KMT2D	missense_variant	YES	24.5
14:36823751:C:T	rs1057521141	2	71679197	C	T	LOC108588215	downstream_gene_variant	4	168	0.0238095	0.0625	0	0.0556	0	Pathogenic/Likely_pathogenic	Autosomal_recessive_limb-girdle_muscular_dystrophy_type_2B|Qualitative_or_quantitative_defects_of_dysferlin|not_provided	DYSF	missense_variant	NO	25.7
22:9994982:C:T	rs879254534	19	11105366	C	T	LDLR	missense_variant	1	168	0.00595238	0	0	0.0278	0	Pathogenic/Likely_pathogenic	Familial_hypercholesterolemia|Hypercholesterolemia,_familial,_1	LDLR	stop_gained,intron_variant	NO	35
Likely_pathogenic
10:107534744:C:T	rs751122392	14	76076597	C	T	IFT43	intron_variant	3	168	0.0178571	0.0313	0.04	0	0	Likely_pathogenic	not_provided	IFT43	synonymous_variant,intron_variant	YES	0.139
10:42430818:C:T	rs979186313	15	40621785	A	G	KNL1	synonymous_variant	133	168	0.791667	0.3438	0.22	0.1667	0.14	Likely_pathogenic	Microcephaly_4,_primary,_autosomal_recessive	KNL1	synonymous_variant	YES	0.315
11:5831070:A:G	rs864622543	11	108287441	A	G	ATM	intron_variant	79	168	0.470238	0.7813	0.5	0.1944	0.44	Likely_pathogenic	Ataxia-telangiectasia_syndrome|Hereditary_cancer-predisposing_syndrome	ATM	intron_variant	YES	0.049
18:26568817:T:C	rs118203910	1	169518453	G	A	F5	missense_variant	4	168	0.0238095	1	0.98	1	0.94	Likely_pathogenic	Factor_V_deficiency	F5	missense_variant	YES	31
2:1601055:G:T	rs200853731	7	66092079	G	T	ASL	missense_variant	2	168	0.0119048	0	0	0	0.04	Likely_pathogenic	Argininosuccinate_lyase_deficiency	ASL	missense_variant	YES	26.6
4:46330371:C:T	rs2113877345	6	41159067	C	T	TREM2	splice_acceptor_variant	2	168	0.0119048	0	0.02	0	0.02	Likely_pathogenic	not_provided	TREM2	splice_acceptor_variant,intron_variant	YES	33
4:57040110:C:A	rs2128209217	6	52056697	C	A	PKHD1	splice_donor_variant	125	168	0.744048	0.75	0.66	0.9167	0.7	Likely_pathogenic	Autosomal_recessive_polycystic_kidney_disease	PKHD1	splice_donor_variant	YES	25.7
5:10531420:T:C	rs576243101	20	5302137	C	T	PROKR2	missense_variant	53	168	0.315476	0.7813	0.84	0.5278	0.58	Likely_pathogenic	not_provided	PROKR2	missense_variant	YES	15.68
5:36862718:G:A	rs35187177	20	43570636	G	A	SGK2	missense_variant	3	168	0.0178571	0.0938	0	0	0	Likely_pathogenic	Colorectal_cancer	SGK2	missense_variant	YES	31
5:5037801:C:T	rs748725549	20	31997192	G	A	XKR7	missense_variant	2	168	0.0119048	0	0	0.0556	0	Likely_pathogenic	Moyamoya_angiopathy	XKR7	missense_variant	YES	24.7
9:68087755:G:T	rs2120361380	12	49026655	C	A	KMT2D	missense_variant	67	168	0.39881	0.4375	0.42	0.3611	0.38	Likely_pathogenic	Kabuki_syndrome_1	KMT2D	missense_variant	YES	26.4
9:90628336:C:T	rs1381940328	12	88119155	G	A	CEP290	intron_variant	32	168	0.190476	0	0.2	0.3611	0.18	Likely_pathogenic	Leber_congenital_amaurosis_10	CEP290	intron_variant	YES	5.519
10:107534744:C:T	rs751122392	14	76076597	C	T	IFT43	splice_region_variant&synonymous_variant	3	168	0.0178571	0.0313	0.04	0	0	Likely_pathogenic	not_provided	IFT43	synonymous_variant,intron_variant	NO	0.139
11:5831070:A:G	rs864622543	11	108287441	A	G	ATM	intron_variant&non_coding_transcript_variant	79	168	0.470238	0.7813	0.5	0.1944	0.44	Likely_pathogenic	Ataxia-telangiectasia_syndrome|Hereditary_cancer-predisposing_syndrome	ATM	intron_variant	NO	0.049
11:9432549:C:T	rs1419374563	11	111982362	C	T	DIXDC1	missense_variant	29	168	0.172619	0.0938	0.16	0.3889	0.08	Likely_pathogenic	Obesity	DIXDC1	stop_gained	NO	35
11:9432549:C:T	rs1419374563	11	111982362	C	T	LOC118145697	upstream_gene_variant	29	168	0.172619	0.0938	0.16	0.3889	0.08	Likely_pathogenic	Obesity	DIXDC1	stop_gained	NO	35
14:91006652:C:T	rs143301836	2	21037162	G	A	APOB	missense_variant	3	168	0.0178571	0.0938	0	0	0	Likely_pathogenic	Familial_hypobetalipoproteinemia_1|Hypobetalipoproteinemia	APOB	stop_gained	NO	34
14:91006652:C:T	rs143301836	2	21037162	G	A	TDRD15	intron_variant	3	168	0.0178571	0.0938	0	0	0	Likely_pathogenic	Familial_hypobetalipoproteinemia_1|Hypobetalipoproteinemia	APOB	stop_gained	NO	34
4:46330371:C:T	.	6	41159067	C	T	LOC118152854	intron_variant&non_coding_transcript_variant	2	168	0.0119048	0	0.02	0	0.02	Likely_pathogenic	not_provided	TREM2	splice_acceptor_variant,intron_variant	NO	33
4:57040110:C:A	.	6	52056697	C	A	PKHD1	missense_variant	125	168	0.744048	0.75	0.66	0.9167	0.7	Likely_pathogenic	Autosomal_recessive_polycystic_kidney_disease	PKHD1	splice_donor_variant	NO	25.7
4:57040110:C:A	.	6	52056697	C	A	PKHD1	upstream_gene_variant	125	168	0.744048	0.75	0.66	0.9167	0.7	Likely_pathogenic	Autosomal_recessive_polycystic_kidney_disease	PKHD1	splice_donor_variant	NO	25.7
5:23384173:A:G	rs1555789463	20	18535747	G	A	SEC23B	splice_region_variant&intron_variant	164	168	0.97619	0.0938	0.02	0	0	Likely_pathogenic	Congenital_dyserythropoietic_anemia,_type_II|Cowden_syndrome_7	SEC23B	intron_variant	NO	19.99
6:61326184:C:A	.	2	166058639	G	T	LOC100386406	missense_variant	1	168	0.00595238	0.0313	0	0	0	Likely_pathogenic	Severe_myoclonic_epilepsy_in_infancy	SCN1A	missense_variant,non-coding_transcript_variant,5_prime_UTR_variant	NO	25.1
Other
1:205597922:C:T	rs577429531	22	36320310	C	T	MYH9	missense_variant	11	168	0.0654762	0	0	0.3056	0	.	.	MYH9	missense_variant	YES	18.16
3:74692360:C:T	.	4	121697011	A	G	ANXA5	5_prime_UTR_variant	164	168	0.97619	0.125	0	0	0	.	.	ANXA5		NO	15.27
4:32564700:C:T	.	6	29944503	T	C	.	intergenic_variant	158	168	0.940476	0.1875	0.04	0.0556	0	.	.	HLA-A	missense_variant,synonymous_variant	NO	0.922
10:18947815:C:T	rs56204206	15	74411928	C	T	SEMA7A	missense_variant	6	168	0.0357143	0.125	0.02	0	0.02	Affects	John_Milton_Hagen_blood_group_system	SEMA7A	missense_variant	YES	15.67
10:102444414:A:G	rs28742977	14	70978539	A	G	PCNX1	synonymous_variant	13	168	0.077381	0	0.18	0	0.08	Benign	not_provided	PCNX1	synonymous_variant	YES	0.77
10:105438522:G:A	rs7141392	14	73961583	A	G	COQ6	intron_variant	82	168	0.488095	0.3438	0.42	0.6111	0.64	Benign	Familial_steroid-resistant_nephrotic_syndrome_with_sensorineural_deafness|not_specified|not_provided	ENTPD5	intron_variant	NO	9.727
10:105438522:G:A	rs7141392	14	73961583	A	G	ENTPD5	downstream_gene_variant	82	168	0.488095	0.3438	0.42	0.6111	0.64	Benign	Familial_steroid-resistant_nephrotic_syndrome_with_sensorineural_deafness|not_specified|not_provided	ENTPD5	intron_variant	NO	9.727
10:108485844:T:C	.	14	77027532	T	C	CIPC	upstream_gene_variant	1	168	0.00595238	0	0.02	0	0	Benign	Neurodevelopmental_disorder_with_regression,_abnormal_movements,_loss_of_speech,_and_seizures|not_provided	IRF2BPL	synonymous_variant	NO	13.14
10:108485844:T:C	.	14	77027532	T	C	IRF2BPL	synonymous_variant	1	168	0.00595238	0	0.02	0	0	Benign	Neurodevelopmental_disorder_with_regression,_abnormal_movements,_loss_of_speech,_and_seizures|not_provided	IRF2BPL	synonymous_variant	YES	13.14
10:109113485:A:G	rs7155278	14	77616622	G	A	LOC118145126	upstream_gene_variant	73	168	0.434524	0.6563	0.7	0.3889	0.5	Benign	Neuropathy,_hereditary_sensory_and_autonomic,_type_1C|not_specified	SPTLC2	5_prime_UTR_variant	NO	8.817
10:109113485:A:G	rs7155278	14	77616622	G	A	SPTLC2	5_prime_UTR_variant	73	168	0.434524	0.6563	0.7	0.3889	0.5	Benign	Neuropathy,_hereditary_sensory_and_autonomic,_type_1C|not_specified	SPTLC2	5_prime_UTR_variant	YES	8.817
10:121438346:A:G	rs34563565	14	89985177	A	G	TDP1	non_coding_transcript_exon_variant	88	168	0.52381	0.4688	0.62	0.5556	0.44	Benign	Spinocerebellar_ataxia,_autosomal_recessive,_with_axonal_neuropathy_1|not_specified|not_provided	TDP1	synonymous_variant	NO	0.538
10:121438346:A:G	rs34563565	14	89985177	A	G	TDP1	synonymous_variant	88	168	0.52381	0.4688	0.62	0.5556	0.44	Benign	Spinocerebellar_ataxia,_autosomal_recessive,_with_axonal_neuropathy_1|not_specified|not_provided	TDP1	synonymous_variant	YES	0.538
10:126915145:G:A	.	14	95544252	G	A	GLRX5	3_prime_UTR_variant	55	168	0.327381	0.2813	0.38	0.1111	0.46	Benign	not_provided	GLRX5	3_prime_UTR_variant	YES	6.832
10:127708756:T:C	.	14	96317127	C	T	ATG2B	intron_variant	141	168	0.839286	0.3125	0.12	0.0833	0.16	Benign	not_provided	ATG2B	intron_variant	YES	5.594
10:127872414:A:T	.	14	96487075	A	T	AK7	intron_variant	7	168	0.0416667	0	0	0.1667	0.02	Benign	not_provided	AK7	intron_variant	YES	0.348
10:127872414:A:T	.	14	96487075	A	T	LOC118145314	upstream_gene_variant	7	168	0.0416667	0	0	0.1667	0.02	Benign	not_provided	AK7	intron_variant	NO	0.348
10:131367898:C:T	rs145292067	14	99914658	C	T	EML1	synonymous_variant	3	168	0.0178571	0.0313	0.04	0	0	Benign	not_provided	EML1	synonymous_variant,intron_variant	YES	0.953
10:133487264:G:A	rs34690489	14	102000093	G	A	DYNC1H1	synonymous_variant	74	168	0.440476	0.1875	0.58	0.4167	0.48	Benign	Charcot-Marie-Tooth_disease_axonal_type_2O|Charcot-Marie-Tooth_disease|Autosomal_dominant_cerebellar_ataxia|Inborn_genetic_diseases|not_specified|not_provided	DYNC1H1	synonymous_variant	YES	2.932
10:136182794:C:T	.	14	104746309	C	T	ADSS1	synonymous_variant	19	168	0.113095	0.2188	0.12	0.1111	0.04	Benign	not_provided	ADSS1	synonymous_variant	YES	1.089
10:136182794:C:T	.	14	104746309	C	T	LOC108593583	downstream_gene_variant	19	168	0.113095	0.2188	0.12	0.1111	0.04	Benign	not_provided	ADSS1	synonymous_variant	NO	1.089
10:136182794:C:T	.	14	104746309	C	T	SIVA1	upstream_gene_variant	19	168	0.113095	0.2188	0.12	0.1111	0.04	Benign	not_provided	ADSS1	synonymous_variant	NO	1.089
10:136218152:G:A	.	14	104780292	G	A	AKT1	intron_variant	7	168	0.0416667	0.0625	0.02	0.0278	0.06	Benign	not_provided	AKT1	intron_variant	YES	3.103
10:136478105:T:C	rs61739168	14	105051408	C	T	GPR132	synonymous_variant	154	168	0.916667	0	0.08	0.0833	0.14	Benign	not_provided	GPR132	synonymous_variant	YES	0.261
10:136568825:C:T	rs139751287	14	105146681	C	T	JAG2	synonymous_variant	81	168	0.482143	0.5625	0.5	0.4444	0.44	Benign	not_provided	JAG2	synonymous_variant	YES	2.717
10:17057766:T:C	.	15	72345619	C	T	HEXA	intron_variant	159	168	0.946429	0.1875	0.02	0	0.04	Benign	not_provided	HEXA	intron_variant	YES	2.947
10:18716893:G:A	rs142048815	15	74180786	G	A	ISLR	downstream_gene_variant	21	168	0.125	0.25	0.18	0	0.08	Benign	Matthew-Wood_syndrome|not_provided	STRA6	synonymous_variant	NO	0.779
10:18716893:G:A	rs142048815	15	74180786	G	A	STRA6	synonymous_variant	21	168	0.125	0.25	0.18	0	0.08	Benign	Matthew-Wood_syndrome|not_provided	STRA6	synonymous_variant	YES	0.779
10:21691845:G:A	.	15	77018104	C	T	PSTPIP1	intron_variant	9	168	0.0535714	0	0.12	0.0278	0.04	Benign	not_provided	PSTPIP1	intron_variant	YES	2.226
10:23168386:A:G	rs112308337	15	78131091	G	A	CIB2	intron_variant	19	168	0.113095	0.8125	1	0.6944	0.96	Benign	not_provided	CIB2	intron_variant	YES	10.55
10:3140144:T:C	.	15	59225037	T	C	MYO1E	intron_variant	14	168	0.0833333	0	0.08	0.2778	0	Benign	not_provided	MYO1E	intron_variant	YES	3.221
10:3147672:G:A	.	15	59231738	G	A	MYO1E	synonymous_variant	3	168	0.0178571	0.0938	0	0	0	Benign	not_provided	MYO1E	synonymous_variant	YES	0.468
10:3174480:G:A	.	15	59256622	G	A	MYO1E	intron_variant	3	168	0.0178571	0	0	0	0.06	Benign	not_provided	MYO1E	intron_variant	YES	0.019
10:32706085:G:A	rs73394223	15	48526538	G	A	FBN1	intron_variant	3	168	0.0178571	0	0	0	0.06	Benign	not_provided	FBN1	intron_variant	YES	2.953
10:32706085:G:A	rs73394223	15	48526538	G	A	FBN1	intron_variant&non_coding_transcript_variant	3	168	0.0178571	0	0	0	0.06	Benign	not_provided	FBN1	intron_variant	NO	2.953
10:36301864:C:G	.	15	52124394	C	G	GNB5	intron_variant	4	168	0.0238095	0	0	0.1111	0	Benign	not_provided	GNB5	intron_variant	YES	2.872
10:36302221:C:T	.	15	52124739	C	T	GNB5	intron_variant	5	168	0.0297619	0.125	0.02	0	0	Benign	not_provided	GNB5	intron_variant	YES	3.291
10:39474617:G:A	rs1050931	15	55205493	G	A	RAB27A	3_prime_UTR_variant	2	168	0.0119048	0.0625	0	0	0	Benign	Griscelli_syndrome_type_2|not_specified|not_provided	RAB27A	3_prime_UTR_variant	YES	3.736
10:41307058:C:T	rs28510088	15	41765070	G	A	LOC118144856	intron_variant&non_coding_transcript_variant	11	168	0.0654762	0	0.06	0.0833	0.1	Benign	not_provided	MGA	intron_variant	NO	0.003
10:41307058:C:T	rs28510088	15	41765070	G	A	MGA	intron_variant	11	168	0.0654762	0	0.06	0.0833	0.1	Benign	not_provided	MGA	intron_variant	YES	0.003
10:41307058:C:T	rs28510088	15	41765070	G	A	MGA	splice_region_variant&intron_variant	11	168	0.0654762	0	0.06	0.0833	0.1	Benign	not_provided	MGA	intron_variant	NO	0.003
10:41517795:G:A	rs56363203	15	41562687	C	T	TYRO3	synonymous_variant	14	168	0.0833333	0.1563	0.04	0	0.14	Benign	not_provided	TYRO3	synonymous_variant	YES	0.691
10:49921150:G:A	rs74005974	15	33728885	G	A	RYR3	synonymous_variant	21	168	0.125	0.25	0.04	0.1111	0.14	Benign	Epileptic_encephalopathy	RYR3	synonymous_variant	YES	0.382
10:51820441:G:A	.	14	20693222	A	G	ANG	intron_variant	161	168	0.958333	0.0625	0.08	0	0.02	Benign	not_provided	ANG	intron_variant	YES	6.074
10:51820441:G:A	.	14	20693222	A	G	RNASE4	intron_variant	161	168	0.958333	0.0625	0.08	0	0.02	Benign	not_provided	ANG	intron_variant	NO	6.074
10:53445352:A:G	.	14	22574887	A	G	DAD1	intron_variant	3	168	0.0178571	0.0938	0	0	0	Benign	not_provided	DAD1	intron_variant	YES	0.008
10:54961743:G:A	rs115577457	14	24179090	G	A	IPO4	downstream_gene_variant	2	168	0.0119048	0.0313	0	0.0278	0	Benign	not_provided	REC8	synonymous_variant	NO	1.558
10:54961743:G:A	rs115577457	14	24179090	G	A	REC8	synonymous_variant	2	168	0.0119048	0.0313	0	0.0278	0	Benign	not_provided	REC8	synonymous_variant	YES	1.558
10:6389747:C:T	rs74749187	15	61890341	C	T	VPS13C	non_coding_transcript_exon_variant	50	168	0.297619	0.5	0.28	0.3889	0.12	Benign	not_provided	VPS13C	synonymous_variant	NO	0.096
10:6389747:C:T	rs74749187	15	61890341	C	T	VPS13C	synonymous_variant	50	168	0.297619	0.5	0.28	0.3889	0.12	Benign	not_provided	VPS13C	synonymous_variant	YES	0.096
10:6459917:A:G	.	15	61962973	A	G	VPS13C	intron_variant	5	168	0.0297619	0	0	0	0.1	Benign	not_provided	VPS13C	intron_variant	YES	5.012
10:6459917:A:G	.	15	61962973	A	G	VPS13C	intron_variant&non_coding_transcript_variant	5	168	0.0297619	0	0	0	0.1	Benign	not_provided	VPS13C	intron_variant	NO	5.012
10:6499423:T:C	.	15	62010532	C	T	VPS13C	non_coding_transcript_exon_variant	46	168	0.27381	0.8438	0.68	0.8889	0.58	Benign	not_provided	VPS13C	synonymous_variant	NO	4.548
10:6499423:T:C	.	15	62010532	C	T	VPS13C	synonymous_variant	46	168	0.27381	0.8438	0.68	0.8889	0.58	Benign	not_provided	VPS13C	synonymous_variant	YES	4.548
10:6499423:T:C	.	15	62010532	C	T	VPS13C	upstream_gene_variant	46	168	0.27381	0.8438	0.68	0.8889	0.58	Benign	not_provided	VPS13C	synonymous_variant	NO	4.548
10:6545951:T:C	.	15	62060644	C	T	VPS13C	upstream_gene_variant	164	168	0.97619	0	0.02	0	0.06	Benign	not_provided	VPS13C	non-coding_transcript_variant	NO	7.509
10:66034481:C:T	rs113488536	14	35053286	C	T	FAM177A1	synonymous_variant	8	168	0.047619	0	0.04	0	0.12	Benign	not_provided	FAM177A1	synonymous_variant	YES	5.819
10:7492015:G:C	rs3809568	15	63042410	C	G	TPM1	upstream_gene_variant	135	168	0.803571	0.0313	0.24	0.2778	0.2	Benign	not_provided	TPM1		NO	8.076
10:76237703:G:A	.	14	45153616	A	G	LOC100397303	intron_variant	161	168	0.958333	0.0625	0.04	0	0.06	Benign	not_provided	FANCM	intron_variant	NO	0.172
10:81887055:T:C	rs41299191	14	50758379	T	C	NIN	intron_variant	40	168	0.238095	0.2813	0.24	0.2222	0.22	Benign	not_specified|not_provided	NIN	missense_variant,intron_variant	YES	15.99
10:81887055:T:C	rs41299191	14	50758379	T	C	NIN	missense_variant	40	168	0.238095	0.2813	0.24	0.2222	0.22	Benign	not_specified|not_provided	NIN	missense_variant,intron_variant	YES	15.99
10:81887055:T:C	rs41299191	14	50758379	T	C	NIN	non_coding_transcript_exon_variant	40	168	0.238095	0.2813	0.24	0.2222	0.22	Benign	not_specified|not_provided	NIN	missense_variant,intron_variant	NO	15.99
10:82037997:C:T	.	14	50915687	T	C	PYGL	intron_variant	163	168	0.970238	0.125	0.02	0	0	Benign	not_provided	PYGL	intron_variant	YES	0.927
10:85968680:G:A	.	14	54865054	A	G	GCH1	intron_variant	154	168	0.916667	0.125	0.08	0	0.12	Benign	not_provided	GCH1	intron_variant	YES	0.454
10:92982193:T:C	rs141997782	14	61732424	C	T	HIF1A	synonymous_variant	57	168	0.339286	0.6875	0.64	0.7778	0.58	Benign	not_provided	HIF1A	synonymous_variant	YES	9.132
10:94627895:G:A	rs61732995	14	63384503	G	A	PPP2R5E	non_coding_transcript_exon_variant	1	168	0.00595238	0.0313	0	0	0	Benign	not_provided	PPP2R5E	non-coding_transcript_variant,synonymous_variant	NO	5.296
10:94627895:G:A	rs61732995	14	63384503	G	A	PPP2R5E	synonymous_variant	1	168	0.00595238	0.0313	0	0	0	Benign	not_provided	PPP2R5E	non-coding_transcript_variant,synonymous_variant	YES	5.296
10:95378902:C:T	.	14	64177465	C	T	SYNE2	synonymous_variant	27	168	0.160714	0.2188	0.1	0.3056	0.08	Benign	Emery-Dreifuss_muscular_dystrophy_5,_autosomal_dominant	SYNE2	synonymous_variant	YES	2.404
10:95663937:T:C	rs76493017	14	64469568	T	C	AKAP5	synonymous_variant	1	168	0.00595238	0.0313	0	0	0	Benign	not_provided	ZBTB25	synonymous_variant,intron_variant	NO	8.815
10:95960664:C:T	rs57421986	14	64749402	C	T	SPTB	synonymous_variant	4	168	0.0238095	0.125	0	0	0	Benign	not_specified|not_provided	SPTB	synonymous_variant,3_prime_UTR_variant	YES	2.602
10:95991069:A:G	.	14	64779288	G	A	SPTB	intron_variant	138	168	0.821429	0.4063	0.1	0.0556	0.2	Benign	Hereditary_spherocytosis_type_2|not_provided	SPTB	intron_variant	YES	2.939
10:99346868:T:C	.	14	67790366	T	C	ZFYVE26	intron_variant	77	168	0.458333	0.5625	0.28	0.6389	0.44	Benign	not_provided	ZFYVE26	intron_variant	YES	0.126
11_000474F_qpd_obj:73693:A:G	rs61749187	11	69810705	G	A	FGF3	splice_region_variant&intron_variant	24	168	0.142857	0.875	0.86	0.9167	0.8	Benign	not_specified|not_provided	FGF3	intron_variant	NO	8.498
1:104444366:G:A	rs76077278	9	77315309	G	A	LOC100894345	intron_variant	11	168	0.0654762	0.0313	0.04	0.1111	0.08	Benign	Chorea-acanthocytosis|not_provided	VPS13A	missense_variant	NO	12.85
1:104444366:G:A	rs76077278	9	77315309	G	A	VPS13A	missense_variant	11	168	0.0654762	0.0313	0.04	0.1111	0.08	Benign	Chorea-acanthocytosis|not_provided	VPS13A	missense_variant	YES	12.85
1:104444366:G:A	rs76077278	9	77315309	G	A	VPS13A	non_coding_transcript_exon_variant	11	168	0.0654762	0.0313	0.04	0.1111	0.08	Benign	Chorea-acanthocytosis|not_provided	VPS13A	missense_variant	NO	12.85
1:105027436:T:C	rs770313916	9	286571	C	T	DOCK8	non_coding_transcript_exon_variant	152	168	0.904762	0.1563	0.06	0.1667	0.04	Benign	not_specified	DOCK8	synonymous_variant	NO	0.258
1:105027436:T:C	rs770313916	9	286571	C	T	DOCK8	synonymous_variant	152	168	0.904762	0.1563	0.06	0.1667	0.04	Benign	not_specified	DOCK8	synonymous_variant	YES	0.258
1:105146671:G:A	.	9	407227	A	G	DOCK8	intron_variant	121	168	0.720238	0.375	0.32	0.25	0.2	Benign	not_provided	DOCK8	intron_variant	YES	4.406
1:105146671:G:A	.	9	407227	A	G	DOCK8	intron_variant&non_coding_transcript_variant	121	168	0.720238	0.375	0.32	0.25	0.2	Benign	not_provided	DOCK8	intron_variant	NO	4.406
1:105460687:A:G	.	9	730490	G	A	KANK1	intron_variant	117	168	0.696429	0.3438	0.4	0.3611	0.14	Benign	not_provided	KANK1	intron_variant	YES	0.11
1:105460687:A:G	.	9	730490	G	A	KANK1	intron_variant&non_coding_transcript_variant	117	168	0.696429	0.3438	0.4	0.3611	0.14	Benign	not_provided	KANK1	intron_variant	NO	0.11
1:106835305:C:T	.	9	2097585	C	T	SMARCA2	intron_variant	1	168	0.00595238	0	0	0.0278	0	Benign	not_provided	SMARCA2	intron_variant	YES	0.454
1:108589299:T:C	.	9	3829212	T	C	GLIS3	intron_variant	1	168	0.00595238	0	0.02	0	0	Benign	not_provided	GLIS3	intron_variant	YES	0.023
1:108589299:T:C	.	9	3829212	T	C	GLIS3	intron_variant&non_coding_transcript_variant	1	168	0.00595238	0	0.02	0	0	Benign	not_provided	GLIS3	intron_variant	NO	0.023
1:109912417:T:C	rs55873896	9	5090810	C	T	JAK2	synonymous_variant	158	168	0.940476	0.0938	0.08	0.0833	0	Benign	not_provided	JAK2	non-coding_transcript_variant,synonymous_variant	YES	7.148
11:10773014:A:G	.	11	113363749	A	G	TTC12	intron_variant	62	168	0.369048	0.5	0.28	0.3611	0.38	Benign	not_provided	TTC12	intron_variant	YES	1.283
11:1078475:A:G	rs12574626	11	103282190	G	A	DYNC2H1	synonymous_variant	8	168	0.047619	1	0.92	0.9722	0.94	Benign	Asphyxiating_thoracic_dystrophy_3|Jeune_thoracic_dystrophy|not_specified	DYNC2H1	synonymous_variant	YES	0.403
11:10809691:T:C	rs17115457	11	113399130	C	T	ANKK1	synonymous_variant	73	168	0.434524	0.5625	0.34	0.7222	0.68	Benign	not_provided	ANKK1	synonymous_variant	YES	0.015
11:10834991:A:G	rs200272626	11	113424574	G	A	DRD2	intron_variant	87	168	0.517857	0.6875	0.54	0.3889	0.36	Benign	Dystonic_disorder	DRD2	synonymous_variant	NO	0.09
11:10834991:A:G	rs200272626	11	113424574	G	A	DRD2	synonymous_variant	87	168	0.517857	0.6875	0.54	0.3889	0.36	Benign	Dystonic_disorder	DRD2	synonymous_variant	YES	0.09
11:108760251:G:A	rs1139266	11	45811384	G	A	SLC35C1	3_prime_UTR_variant	1	168	0.00595238	0	0	0	0.02	Benign	Leukocyte_adhesion_deficiency_type_II|not_specified|not_provided	SLC35C1	3_prime_UTR_variant	YES	1.93
11:109319686:T:C	.	11	46372408	T	C	DGKZ	intron_variant	1	168	0.00595238	0	0	0	0.02	Benign	not_provided	DGKZ	intron_variant	YES	0.165
11:109639113:T:C	rs61736849	11	46667803	T	C	ATG13	synonymous_variant	133	168	0.791667	0.7188	0.84	0.8056	0.78	Benign	not_provided	ATG13	non-coding_transcript_variant,synonymous_variant	YES	1.041
11:109694853:T:C	.	11	46719945	C	T	F2	intron_variant	75	168	0.446429	0.4375	0.6	0.3333	0.74	Benign	not_provided	F2	intron_variant	YES	4.448
11:109849975:C:T	rs3816614	11	46868614	C	T	LRP4	missense_variant	1	168	0.00595238	0	0	0	0.02	Benign	Cenani-Lenz_syndactyly_syndrome|Sclerosteosis_2|Congenital_myasthenic_syndrome_17|not_provided	LRP4	missense_variant	YES	17.04
11:109872027:G:A	rs150253578	11	46890364	G	A	LRP4	missense_variant	2	168	0.0119048	0	0	0	0.04	Benign	Cenani-Lenz_syndactyly_syndrome|Sclerosteosis_2|Congenital_myasthenic_syndrome_17	LRP4	missense_variant	YES	26.2
11:11110388:C:A	rs117055692	11	113690928	C	A	TMPRSS5	missense_variant	4	168	0.0238095	0	0.06	0	0.02	Benign	not_provided	TMPRSS5	missense_variant,non-coding_transcript_variant	YES	13.43
11:11110388:C:A	rs117055692	11	113690928	C	A	TMPRSS5	non_coding_transcript_exon_variant	4	168	0.0238095	0	0.06	0	0.02	Benign	not_provided	TMPRSS5	missense_variant,non-coding_transcript_variant	NO	13.43
11:11114072:T:C	rs61995944	11	113694516	C	T	TMPRSS5	non_coding_transcript_exon_variant	70	168	0.416667	0.5313	0.5	0.6667	0.64	Benign	not_specified	TMPRSS5	non-coding_transcript_variant,synonymous_variant,intron_variant	NO	0.08
11:11114072:T:C	rs61995944	11	113694516	C	T	TMPRSS5	synonymous_variant	70	168	0.416667	0.5313	0.5	0.6667	0.64	Benign	not_specified	TMPRSS5	non-coding_transcript_variant,synonymous_variant,intron_variant	YES	0.08
11:11119579:C:T	.	11	113699768	T	C	TMPRSS5	intron_variant	167	168	0.994048	0	0.02	0	0	Benign	not_provided	TMPRSS5	intron_variant	YES	4.141
11:11119579:C:T	.	11	113699768	T	C	TMPRSS5	intron_variant&non_coding_transcript_variant	167	168	0.994048	0	0.02	0	0	Benign	not_provided	TMPRSS5	intron_variant	NO	4.141
11:114421119:G:A	rs369015266	11	59212161	G	A	DTX4	downstream_gene_variant	25	168	0.14881	0	0.14	0.4167	0.06	Benign	not_provided	MPEG1	synonymous_variant	NO	0.088
11:114421119:G:A	rs369015266	11	59212161	G	A	LOC100396081	downstream_gene_variant	25	168	0.14881	0	0.14	0.4167	0.06	Benign	not_provided	MPEG1	synonymous_variant	NO	0.088
11:114421119:G:A	rs369015266	11	59212161	G	A	MPEG1	synonymous_variant	25	168	0.14881	0	0.14	0.4167	0.06	Benign	not_provided	MPEG1	synonymous_variant	YES	0.088
11:116218256:A:G	rs61746696	11	61265147	G	A	LOC118145511	upstream_gene_variant	85	168	0.505952	0.375	0.64	0.3889	0.5	Benign	not_provided	VWCE	synonymous_variant	NO	0.119
11:116218256:A:G	rs61746696	11	61265147	G	A	VWCE	non_coding_transcript_exon_variant	85	168	0.505952	0.375	0.64	0.3889	0.5	Benign	not_provided	VWCE	synonymous_variant	NO	0.119
11:116218256:A:G	rs61746696	11	61265147	G	A	VWCE	synonymous_variant	85	168	0.505952	0.375	0.64	0.3889	0.5	Benign	not_provided	VWCE	synonymous_variant	YES	0.119
11:11950254:C:T	rs142774949	11	114530438	C	T	LOC118146031	downstream_gene_variant	93	168	0.553571	0.7188	0.48	0.5278	0.54	Benign	not_provided	NXPE1	synonymous_variant	NO	0.977
11:11950254:C:T	rs142774949	11	114530438	C	T	NXPE1	synonymous_variant	93	168	0.553571	0.7188	0.48	0.5278	0.54	Benign	not_provided	NXPE1	synonymous_variant	YES	0.977
11:11950254:C:T	rs142774949	11	114530438	C	T	NXPE2	intron_variant&non_coding_transcript_variant	93	168	0.553571	0.7188	0.48	0.5278	0.54	Benign	not_provided	NXPE1	synonymous_variant	NO	0.977
11:11950254:C:T	rs142774949	11	114530438	C	T	NXPE2	non_coding_transcript_exon_variant	93	168	0.553571	0.7188	0.48	0.5278	0.54	Benign	not_provided	NXPE1	synonymous_variant	NO	0.977
11:120593805:C:T	.	11	65557619	C	T	LTBP3	intron_variant	6	168	0.0357143	0.0625	0.02	0.0278	0.04	Benign	Brachyolmia-amelogenesis_imperfecta_syndrome	LTBP3	intron_variant	YES	10.86
11:121591676:C:T	rs79274952	11	66567557	C	T	ACTN3	downstream_gene_variant	9	168	0.0535714	0.0313	0.04	0.1667	0	Benign	Neuronal_ceroid_lipofuscinosis_13|Inborn_genetic_diseases|not_provided	CTSF	missense_variant	NO	0.185
11:121591676:C:T	rs79274952	11	66567557	C	T	CTSF	intron_variant	9	168	0.0535714	0.0313	0.04	0.1667	0	Benign	Neuronal_ceroid_lipofuscinosis_13|Inborn_genetic_diseases|not_provided	CTSF	missense_variant	NO	0.185
11:121591676:C:T	rs79274952	11	66567557	C	T	CTSF	missense_variant	9	168	0.0535714	0.0313	0.04	0.1667	0	Benign	Neuronal_ceroid_lipofuscinosis_13|Inborn_genetic_diseases|not_provided	CTSF	missense_variant	YES	0.185
11:121728691:A:G	rs368795514	11	66696457	G	A	SPTBN2	synonymous_variant	167	168	0.994048	0	0	0	0.02	Benign	not_provided	SPTBN2	synonymous_variant	YES	0.703
11:121731261:A:G	rs146526805	11	66698768	G	A	SPTBN2	synonymous_variant	167	168	0.994048	0	0	0	0.02	Benign	not_specified|not_provided	SPTBN2	synonymous_variant	YES	0.709
11:121734079:A:G	rs753959566	11	66701255	G	A	SPTBN2	synonymous_variant	166	168	0.988095	0	0.02	0	0.02	Benign	not_specified	SPTBN2	synonymous_variant	YES	0.305
11:122485296:C:T	rs79423227	11	67452544	C	T	CABP4	upstream_gene_variant	1	168	0.00595238	0	0	0	0.02	Benign	Cone-rod_synaptic_disorder,_congenital_nonprogressive	CABP4	missense_variant,5_prime_UTR_variant	NO	18.06
11:122485296:C:T	rs79423227	11	67452544	C	T	GPR152	missense_variant	1	168	0.00595238	0	0	0	0.02	Benign	Cone-rod_synaptic_disorder,_congenital_nonprogressive	CABP4	missense_variant,5_prime_UTR_variant	NO	18.06
11:123136715:A:G	rs78844574	11	68348214	G	A	LRP5	synonymous_variant	10	168	0.0595238	1	0.96	0.9167	0.9	Benign	not_specified|not_provided	LRP5	synonymous_variant,5_prime_UTR_variant	YES	1.717
11:123203204:G:A	.	11	68411200	G	A	LRP5	intron_variant	2	168	0.0119048	0	0.02	0.0278	0	Benign	not_provided	LRP5	intron_variant	YES	0.085
11:123225053:A:G	.	11	68433477	G	A	LRP5	intron_variant	62	168	0.369048	0.375	0.74	0.7778	0.58	Benign	not_provided	LRP5	intron_variant	YES	2.255
11:123225147:A:G	.	11	68433572	G	A	LRP5	intron_variant	61	168	0.363095	0.375	0.74	0.7778	0.6	Benign	not_provided	LRP5	intron_variant	YES	5.295
11:123546210:T:C	rs111407620	11	68761655	C	T	CPT1A	synonymous_variant	56	168	0.333333	1	0.6	0.5278	0.62	Benign	Carnitine_palmitoyl_transferase_1A_deficiency|not_specified	CPT1A	synonymous_variant	YES	0.124
11:123577223:C:T	.	11	68797205	C	T	CPT1A	intron_variant	9	168	0.0535714	0.0625	0	0.1667	0.02	Benign	not_provided	CPT1A	intron_variant	YES	1.738
11:123708405:C:T	rs546382	11	68936796	C	T	IGHMBP2	synonymous_variant	1	168	0.00595238	0	0	0	0.02	Benign	Autosomal_recessive_distal_spinal_muscular_atrophy_1|Charcot-Marie-Tooth_disease_axonal_type_2S|Charcot-Marie-Tooth_disease|not_specified|not_provided	IGHMBP2	synonymous_variant	YES	0.596
11:125314270:T:C	rs147288898	11	70473394	C	T	LOC118145680	upstream_gene_variant	11	168	0.0654762	0.9063	0.96	1	0.88	Benign	not_provided	SHANK2	non-coding_transcript_variant,synonymous_variant	NO	2.887
11:125314270:T:C	rs147288898	11	70473394	C	T	SHANK2	synonymous_variant	11	168	0.0654762	0.9063	0.96	1	0.88	Benign	not_provided	SHANK2	non-coding_transcript_variant,synonymous_variant	YES	2.887
11:1260118:G:A	.	11	103468518	G	A	DYNC2H1	intron_variant	1	168	0.00595238	0	0	0	0.02	Benign	not_provided	DYNC2H1	intron_variant	YES	0.044
11:1260118:G:A	.	11	103468518	G	A	LOC118145582	upstream_gene_variant	1	168	0.00595238	0	0	0	0.02	Benign	not_provided	DYNC2H1	intron_variant	NO	0.044
11:127357350:C:T	rs114504837	11	2415394	G	A	TRPM5	synonymous_variant	2	168	0.0119048	0	0	0.0556	0	Benign	not_provided	TRPM5	synonymous_variant	YES	0.138
11:127378050:G:C	.	11	2395692	G	C	CD81	intron_variant	118	168	0.702381	0.4375	0.24	0.3056	0.26	Benign	not_provided	CD81	intron_variant	YES	0.139
11:127378050:G:C	.	11	2395692	G	C	TSSC4	upstream_gene_variant	118	168	0.702381	0.4375	0.24	0.3056	0.26	Benign	not_provided	CD81	intron_variant	NO	0.139
11:127378310:G:A	rs116421908	11	2395524	C	T	CD81	splice_region_variant&intron_variant	1	168	0.00595238	0	0	0.0278	0	Benign	not_provided	CD81	intron_variant	NO	2.683
11:127378310:G:A	rs116421908	11	2395524	C	T	TSSC4	upstream_gene_variant	1	168	0.00595238	0	0	0.0278	0	Benign	not_provided	CD81	intron_variant	NO	2.683
11:127379198:T:C	.	11	2394734	G	A	CD81	intron_variant	123	166	0.740964	0.1333	0.36	0.4722	0.08	Benign	not_provided	CD81	intron_variant	YES	0.045
11:127379198:T:C	.	11	2394734	G	A	TSSC4	upstream_gene_variant	123	166	0.740964	0.1333	0.36	0.4722	0.08	Benign	not_provided	CD81	intron_variant	NO	0.045
11:128550868:C:T	rs112754512	11	1260643	A	G	MUC5B	missense_variant	125	168	0.744048	0.1875	0.24	0.3333	0.26	Benign	not_provided	MUC5B	missense_variant	YES	0.171
11:129255546:C:T	.	11	540719	G	A	HRAS	upstream_gene_variant	3	168	0.0178571	0	0	0.0556	0.02	Benign	not_provided	LRRC56	missense_variant	NO	10.52
11:129255546:C:T	.	11	540719	G	A	LRRC56	intron_variant	3	168	0.0178571	0	0	0.0556	0.02	Benign	not_provided	LRRC56	missense_variant	NO	10.52
11:129255546:C:T	.	11	540719	G	A	LRRC56	missense_variant	3	168	0.0178571	0	0	0.0556	0.02	Benign	not_provided	LRRC56	missense_variant	YES	10.52
11:129255546:C:T	.	11	540719	G	A	LRRC56	synonymous_variant	3	168	0.0178571	0	0	0.0556	0.02	Benign	not_provided	LRRC56	missense_variant	NO	10.52
11:129255546:C:T	.	11	540719	G	A	LRRC56	upstream_gene_variant	3	168	0.0178571	0	0	0.0556	0.02	Benign	not_provided	LRRC56	missense_variant	NO	10.52
11:14896568:G:A	.	11	117505710	G	A	DSCAML1	non_coding_transcript_exon_variant	61	168	0.363095	0.0625	0.36	0.4444	0.5	Benign	not_provided	DSCAML1	synonymous_variant	NO	8.301
11:14896568:G:A	.	11	117505710	G	A	DSCAML1	synonymous_variant	61	168	0.363095	0.0625	0.36	0.4444	0.5	Benign	not_provided	DSCAML1	synonymous_variant	YES	8.301
11:15202465:C:T	rs565539331	11	117820308	C	T	FXYD2	3_prime_UTR_variant	13	168	0.077381	0.1875	0.08	0.0833	0	Benign	Renal_hypomagnesemia_2	FXYD2	3_prime_UTR_variant	YES	3.052
11:15202465:C:T	rs565539331	11	117820308	C	T	FXYD2	downstream_gene_variant	13	168	0.077381	0.1875	0.08	0.0833	0	Benign	Renal_hypomagnesemia_2	FXYD2	3_prime_UTR_variant	NO	3.052
11:15202465:C:T	rs565539331	11	117820308	C	T	FXYD2	missense_variant	13	168	0.077381	0.1875	0.08	0.0833	0	Benign	Renal_hypomagnesemia_2	FXYD2	3_prime_UTR_variant	NO	3.052
11:15202465:C:T	rs565539331	11	117820308	C	T	LOC118145618	upstream_gene_variant	13	168	0.077381	0.1875	0.08	0.0833	0	Benign	Renal_hypomagnesemia_2	FXYD2	3_prime_UTR_variant	NO	3.052
11:15539360:A:G	.	11	118152722	G	A	SCN4B	intron_variant	118	168	0.702381	0.5	0.22	0.2778	0.26	Benign	not_provided	SCN4B	5_prime_UTR_variant	NO	12.69
11:15539360:A:G	.	11	118152722	G	A	SCN4B	synonymous_variant	118	168	0.702381	0.5	0.22	0.2778	0.26	Benign	not_provided	SCN4B	5_prime_UTR_variant	NO	12.69
11:16677907:G:A	rs2229072	11	119285022	G	A	CBL	synonymous_variant	56	168	0.333333	0.5938	0.38	0.1944	0.22	Benign	CBL-related_disorder|Noonan_syndrome_and_Noonan-related_syndrome|RASopathy|not_specified|Cardiovascular_phenotype|not_provided	CBL	synonymous_variant	YES	0.346
11:16677907:G:A	rs2229072	11	119285022	G	A	LOC118145927	downstream_gene_variant	56	168	0.333333	0.5938	0.38	0.1944	0.22	Benign	CBL-related_disorder|Noonan_syndrome_and_Noonan-related_syndrome|RASopathy|not_specified|Cardiovascular_phenotype|not_provided	CBL	synonymous_variant	NO	0.346
11:16689825:G:A	rs556564719	11	119299526	G	A	CBL	synonymous_variant	1	168	0.00595238	0.0313	0	0	0	Benign	RASopathy|not_provided	CBL	synonymous_variant	YES	3.837
11:16689825:G:A	rs556564719	11	119299526	G	A	MCAM	downstream_gene_variant	1	168	0.00595238	0.0313	0	0	0	Benign	RASopathy|not_provided	CBL	synonymous_variant	NO	3.837
11:18269138:T:C	rs117994876	11	120874188	C	T	GRIK4	synonymous_variant	82	168	0.488095	0.8125	0.44	0.3333	0.52	Benign	not_provided	GRIK4	synonymous_variant	YES	0.357
11:18711629:G:A	rs2115925	11	121311139	A	G	SC5D	3_prime_UTR_variant	159	168	0.946429	0.1563	0.06	0.0278	0	Benign	Lathosterolosis	SC5D	3_prime_UTR_variant	YES	1.34
11:18967593:C:T	rs114921128	11	121570194	C	T	SORL1	synonymous_variant	4	168	0.0238095	0	0.06	0	0.02	Benign	not_provided	SORL1	synonymous_variant	YES	1.588
1:119526876:C:T	rs1048070	9	14735055	T	C	FREM1	3_prime_UTR_variant	102	168	0.607143	0.5313	0.34	0.2778	0.44	Benign	Oculotrichoanal_syndrome	FREM1		NO	0.173
11:22183201:C:T	rs35978862	11	124871084	C	T	ROBO3	synonymous_variant	8	168	0.047619	0.25	0	0	0	Benign	Gaze_palsy,_familial_horizontal,_with_progressive_scoliosis_1	ROBO3	synonymous_variant	YES	3.388
11:22209053:C:T	.	11	124897171	T	C	ROBO4	5_prime_UTR_variant	165	168	0.982143	0	0.04	0	0.02	Benign	not_provided	ROBO4	missense_variant,intron_variant	NO	5.013
11:22209053:C:T	.	11	124897171	T	C	ROBO4	intron_variant	165	168	0.982143	0	0.04	0	0.02	Benign	not_provided	ROBO4	missense_variant,intron_variant	YES	5.013
11:22209053:C:T	.	11	124897171	T	C	ROBO4	missense_variant	165	168	0.982143	0	0.04	0	0.02	Benign	not_provided	ROBO4	missense_variant,intron_variant	YES	5.013
11:22929225:A:G	.	11	125604101	G	A	STT3A	intron_variant	160	168	0.952381	0	0.04	0.1111	0.04	Benign	not_provided	STT3A	intron_variant	YES	0.115
11:23366848:A:G	.	11	125983802	A	G	CDON	intron_variant	2	168	0.0119048	0	0.02	0	0.02	Benign	not_provided	CDON	intron_variant	YES	6.25
11:23393093:G:A	rs142388716	11	126010393	G	A	CDON	synonymous_variant	51	168	0.303571	0.3125	0.18	0.25	0.46	Benign	Holoprosencephaly_11|not_provided	CDON	synonymous_variant	YES	0.05
11:23647388:C:T	rs1786702	11	126269205	T	C	FOXRED1	5_prime_UTR_variant	166	168	0.988095	0	0	0.0556	0	Benign	Mitochondrial_complex_1_deficiency,_nuclear_type_19|Mitochondrial_complex_I_deficiency,_nuclear_type_1|not_provided	FOXRED1	non-coding_transcript_variant,5_prime_UTR_variant	YES	7.438
11:23647388:C:T	rs1786702	11	126269205	T	C	SRPRA	upstream_gene_variant	166	168	0.988095	0	0	0.0556	0	Benign	Mitochondrial_complex_1_deficiency,_nuclear_type_19|Mitochondrial_complex_I_deficiency,_nuclear_type_1|not_provided	FOXRED1	non-coding_transcript_variant,5_prime_UTR_variant	NO	7.438
11:27719634:C:T	.	11	130196976	C	T	ST14	intron_variant	2	168	0.0119048	0	0.04	0	0	Benign	not_provided	ST14	intron_variant	YES	0.276
11:36110728:C:T	rs112258968	11	101483121	G	A	TRPC6	synonymous_variant	19	168	0.113095	0.1875	0.22	0	0.04	Benign	Focal_segmental_glomerulosclerosis_2|not_provided	TRPC6	synonymous_variant	YES	0.22
11:36408649:T:A	rs138237815	11	101128915	A	T	LOC103796104	intron_variant&non_coding_transcript_variant	7	168	0.0416667	0	0	0	0.14	Benign	not_provided	PGR	non-coding_transcript_variant,synonymous_variant,5_prime_UTR_variant,intron_variant	NO	4.032
11:36408649:T:A	rs138237815	11	101128915	A	T	PGR	synonymous_variant	7	168	0.0416667	0	0	0	0.14	Benign	not_provided	PGR	non-coding_transcript_variant,synonymous_variant,5_prime_UTR_variant,intron_variant	YES	4.032
11:364498:A:G	.	11	102606275	A	G	LOC103795993	intron_variant	21	168	0.125	0.125	0.1	0.25	0.06	Benign	not_provided	MMP20	intron_variant	NO	0.033
11:364498:A:G	.	11	102606275	A	G	LOC103795993	intron_variant&non_coding_transcript_variant	21	168	0.125	0.125	0.1	0.25	0.06	Benign	not_provided	MMP20	intron_variant	NO	0.033
11:364498:A:G	.	11	102606275	A	G	MMP20	intron_variant	21	168	0.125	0.125	0.1	0.25	0.06	Benign	not_provided	MMP20	intron_variant	YES	0.033
1:142178623:C:A	.	9	36928392	C	A	PAX5	intron_variant	77	168	0.458333	0.1563	0.52	0.5	0.56	Benign	not_provided	PAX5	intron_variant	YES	0.014
11:42293727:C:T	.	11	95857322	G	A	MTMR2	intron_variant	1	168	0.00595238	0	0	0	0.02	Benign	not_provided	MTMR2	intron_variant	YES	2.712
11:43814066:A:G	rs104895017	11	94464456	T	C	MRE11	intron_variant	12	168	0.0714286	0.25	0.06	0.0278	0	Benign	not_provided	MRE11	intron_variant	YES	0.237
11:43814066:A:G	rs104895017	11	94464456	T	C	MRE11	intron_variant&non_coding_transcript_variant	12	168	0.0714286	0.25	0.06	0.0278	0	Benign	not_provided	MRE11	intron_variant	NO	0.237
11:44494483:A:G	.	11	93801823	T	C	LOC118146035	downstream_gene_variant	12	168	0.0714286	0.0313	0.08	0.0833	0.08	Benign	not_provided	MED17	intron_variant	NO	11.76
11:44494483:A:G	.	11	93801823	T	C	MED17	intron_variant	12	168	0.0714286	0.0313	0.08	0.0833	0.08	Benign	not_provided	MED17	intron_variant	YES	11.76
1:144697913:A:G	.	9	98303037	G	A	GABBR2	intron_variant	15	168	0.0892857	1	0.8	0.9722	0.92	Benign	not_provided	GABBR2	intron_variant	YES	6.842
1:144774369:C:T	.	9	98371905	C	T	GABBR2	intron_variant	28	168	0.166667	0.1875	0.2	0.1944	0.1	Benign	not_provided	GABBR2	intron_variant	YES	3.991
1:145613320:G:C	rs61744789	9	99221811	G	C	ALG2	synonymous_variant	42	168	0.25	0.4063	0.18	0.3056	0.18	Benign	ALG2-congenital_disorder_of_glycosylation|Congenital_myasthenic_syndrome_14|not_specified	ALG2	non-coding_transcript_variant,synonymous_variant	YES	7.33
1:145613320:G:C	rs61744789	9	99221811	G	C	SEC61B	upstream_gene_variant	42	168	0.25	0.4063	0.18	0.3056	0.18	Benign	ALG2-congenital_disorder_of_glycosylation|Congenital_myasthenic_syndrome_14|not_specified	ALG2	non-coding_transcript_variant,synonymous_variant	NO	7.33
1:146648230:C:T	.	9	100296649	C	T	INVS	intron_variant	2	168	0.0119048	0	0	0.0556	0	Benign	not_provided	INVS	intron_variant	YES	0.055
1:146648230:C:T	.	9	100296649	C	T	TEX10	downstream_gene_variant	2	168	0.0119048	0	0	0.0556	0	Benign	not_provided	INVS	intron_variant	NO	0.055
11:5824408:A:T	rs941737393	11	108280981	A	T	ATM	intron_variant	2	168	0.0119048	0	0	0.0556	0	Benign	Ataxia-telangiectasia_syndrome	ATM	intron_variant	YES	7.124
11:5824408:A:T	rs941737393	11	108280981	A	T	ATM	intron_variant&non_coding_transcript_variant	2	168	0.0119048	0	0	0.0556	0	Benign	Ataxia-telangiectasia_syndrome	ATM	intron_variant	NO	7.124
11:59842533:T:C	rs61740650	11	78670240	G	A	TENM4	synonymous_variant	33	168	0.196429	0.8125	0.86	0.8056	0.74	Benign	not_provided	TENM4	synonymous_variant	YES	0.154
11:59843079:C:T	rs61747204	11	78669694	G	A	TENM4	synonymous_variant	4	168	0.0238095	0.0938	0.02	0	0	Benign	not_provided	TENM4	synonymous_variant	YES	0.23
1:160720001:A:G	rs147026086	9	114167960	G	A	COL27A1	non_coding_transcript_exon_variant	82	168	0.488095	0.8125	0.44	0.5	0.4	Benign	not_provided	COL27A1	synonymous_variant	NO	1.33
1:160720001:A:G	rs147026086	9	114167960	G	A	COL27A1	synonymous_variant	82	168	0.488095	0.8125	0.44	0.5	0.4	Benign	not_provided	COL27A1	synonymous_variant	YES	1.33
1:160720526:A:G	rs35739679	9	114168494	G	A	COL27A1	non_coding_transcript_exon_variant	82	168	0.488095	0.8125	0.44	0.5	0.4	Benign	not_provided	COL27A1	synonymous_variant	NO	0.507
1:160720526:A:G	rs35739679	9	114168494	G	A	COL27A1	synonymous_variant	82	168	0.488095	0.8125	0.44	0.5	0.4	Benign	not_provided	COL27A1	synonymous_variant	YES	0.507
1:16078225:A:G	.	13	101107873	A	G	NALCN	intron_variant	18	168	0.107143	0.125	0.1	0.1944	0.04	Benign	not_provided	NALCN	intron_variant	YES	0.037
1:160836294:A:G	.	9	114283717	G	A	COL27A1	non_coding_transcript_exon_variant	17	168	0.10119	0.9375	0.84	0.9722	0.88	Benign	not_provided	COL27A1	synonymous_variant	NO	0.294
1:160836294:A:G	.	9	114283717	G	A	COL27A1	synonymous_variant	17	168	0.10119	0.9375	0.84	0.9722	0.88	Benign	not_provided	COL27A1	synonymous_variant	YES	0.294
1:160858411:C:T	rs41278651	9	114306639	C	T	COL27A1	downstream_gene_variant	2	168	0.0119048	0	0	0.0556	0	Benign	not_provided	COL27A1	synonymous_variant	NO	6.868
1:160858411:C:T	rs41278651	9	114306639	C	T	COL27A1	non_coding_transcript_exon_variant	2	168	0.0119048	0	0	0.0556	0	Benign	not_provided	COL27A1	synonymous_variant	NO	6.868
1:160858411:C:T	rs41278651	9	114306639	C	T	COL27A1	synonymous_variant	2	168	0.0119048	0	0	0.0556	0	Benign	not_provided	COL27A1	synonymous_variant	YES	6.868
1:160858411:C:T	rs41278651	9	114306639	C	T	LOC118144104	upstream_gene_variant	2	168	0.0119048	0	0	0.0556	0	Benign	not_provided	COL27A1	synonymous_variant	NO	6.868
1:161583143:G:A	.	9	115048016	G	A	LOC118144137	downstream_gene_variant	3	168	0.0178571	0.0938	0	0	0	Benign	not_provided	TNC	intron_variant	NO	1.172
1:161583143:G:A	.	9	115048016	G	A	TNC	intron_variant	3	168	0.0178571	0.0938	0	0	0	Benign	not_provided	TNC	intron_variant	YES	1.172
11:630515:C:T	rs149147183	11	102842794	C	T	LOC103795993	intron_variant	11	168	0.0654762	0.0313	0.06	0.1944	0	Benign	not_provided	MMP3	synonymous_variant	NO	0.408
11:630515:C:T	rs149147183	11	102842794	C	T	MMP3	synonymous_variant	11	168	0.0654762	0.0313	0.06	0.1944	0	Benign	not_provided	MMP3	synonymous_variant	YES	0.408
1:163296612:C:T	rs3019	9	116699833	C	T	ASTN2	intron_variant	20	168	0.119048	0.25	0.06	0.1111	0.1	Benign	Sarcotubular_myopathy|Bardet-Biedl_syndrome_11|not_provided	ASTN2	3_prime_UTR_variant,intron_variant	YES	7.777
1:163296612:C:T	rs3019	9	116699833	C	T	TRIM32	3_prime_UTR_variant	20	168	0.119048	0.25	0.06	0.1111	0.1	Benign	Sarcotubular_myopathy|Bardet-Biedl_syndrome_11|not_provided	ASTN2	3_prime_UTR_variant,intron_variant	NO	7.777
11:66699381:A:G	.	11	72190534	C	T	FOLR1	intron_variant	164	168	0.97619	0.125	0	0	0	Benign	not_provided	FOLR1	intron_variant	YES	0.304
11:66699381:A:G	.	11	72190534	C	T	FOLR2	intron_variant	164	168	0.97619	0.125	0	0	0	Benign	not_provided	FOLR1	intron_variant	NO	0.304
1:16691169:C:T	rs62637619	13	101706825	C	T	ITGBL1	missense_variant	14	168	0.0833333	0.1875	0.04	0	0.12	Benign	not_provided	ITGBL1	missense_variant	YES	19.37
1:167188021:A:C	rs41305509	9	120528718	C	A	CDK5RAP2	intron_variant	165	168	0.982143	0	0	0.0833	0	Benign	not_specified|not_provided	CDK5RAP2	intron_variant	YES	0.002
1:167976737:C:T	rs2304393	9	121321336	C	T	GSN	synonymous_variant	4	168	0.0238095	0	0.08	0	0	Benign	Meretoja_syndrome|not_provided	GSN	synonymous_variant	YES	1.004
11:70245842:C:T	.	11	6626859	C	T	DCHS1	synonymous_variant	4	168	0.0238095	0.125	0	0	0	Benign	not_provided	DCHS1	synonymous_variant	YES	4.782
11:70245842:C:T	.	11	6626859	C	T	LOC118145803	upstream_gene_variant	4	168	0.0238095	0.125	0	0	0	Benign	not_provided	DCHS1	synonymous_variant	NO	4.782
11:70250453:G:A	.	11	6631388	G	A	DCHS1	missense_variant	6	168	0.0357143	0.0938	0.02	0.0556	0	Benign	not_provided	DCHS1	missense_variant	YES	24.1
11:70250453:G:A	.	11	6631388	G	A	LOC118145803	intron_variant&non_coding_transcript_variant	6	168	0.0357143	0.0938	0.02	0.0556	0	Benign	not_provided	DCHS1	missense_variant	NO	24.1
1:173549524:G:A	.	9	126690498	A	G	LMX1B	intron_variant	165	168	0.982143	0	0.04	0	0.02	Benign	not_provided	LMX1B	intron_variant	YES	1.739
1:173552303:G:T	.	9	126693339	G	T	LMX1B	intron_variant	3	168	0.0178571	0	0.04	0	0.02	Benign	not_provided	LMX1B	intron_variant	YES	1.353
11:73806391:A:T	rs7128234	11	10001038	A	T	SBF2	intron_variant	3	168	0.0178571	0.0625	0	0.0278	0	Benign	Charcot-Marie-Tooth_disease_type_4B2|Charcot-Marie-Tooth_disease|Charcot-Marie-Tooth_disease_type_4|not_specified|not_provided	SBF2	intron_variant	YES	15.3
1:174336231:T:C	rs3808831	9	127452135	C	T	LOC118148401	upstream_gene_variant	162	168	0.964286	0	0	0.1667	0	Benign	not_provided	LRSAM1	intron_variant	NO	3.205
1:174336231:T:C	rs3808831	9	127452135	C	T	LRSAM1	5_prime_UTR_variant	162	168	0.964286	0	0	0.1667	0	Benign	not_provided	LRSAM1	intron_variant	NO	3.205
1:174336231:T:C	rs3808831	9	127452135	C	T	LRSAM1	intron_variant	162	168	0.964286	0	0	0.1667	0	Benign	not_provided	LRSAM1	intron_variant	YES	3.205
1:174336231:T:C	rs3808831	9	127452135	C	T	RPL12	upstream_gene_variant	162	168	0.964286	0	0	0.1667	0	Benign	not_provided	LRSAM1	intron_variant	NO	3.205
11:74530465:A:G	.	11	10769981	A	G	CTR9	intron_variant	4	168	0.0238095	0	0	0.0278	0.06	Benign	not_provided	CTR9	intron_variant	YES	6.361
11:76706749:G:A	.	11	12881938	G	A	TEAD1	synonymous_variant	4	168	0.0238095	0.125	0	0	0	Benign	not_provided	TEAD1	synonymous_variant	YES	0.706
1:177949727:C:T	rs45603838	9	131038934	C	T	LAMC3	synonymous_variant	6	168	0.0357143	0	0.04	0.1111	0	Benign	not_specified|not_provided	LAMC3	synonymous_variant	YES	1.268
1:177993560:C:T	.	9	131085386	T	C	LAMC3	intron_variant	154	168	0.916667	0	0.12	0.0556	0.12	Benign	not_provided	LAMC3	intron_variant	YES	1.424
11:79020466:G:A	rs61745926	11	15200836	G	A	INSC	missense_variant	11	168	0.0654762	0.0938	0.08	0	0.08	Benign	not_provided	INSC	missense_variant,intron_variant	YES	19.39
1:180315868:C:T	rs36023469	9	133454367	T	C	ADAMTS13	intron_variant	101	168	0.60119	0.4375	0.42	0.5278	0.26	Benign	not_specified	ADAMTS13	intron_variant	YES	0.146
1:180517167:A:G	.	9	133652860	G	A	DBH	intron_variant	80	168	0.47619	0.6563	0.58	0.6667	0.28	Benign	not_provided	DBH	intron_variant	YES	0.108
11:81486239:C:T	rs75133799	11	17593282	C	T	OTOG	synonymous_variant	15	168	0.0892857	0.0938	0.04	0	0.2	Benign	not_specified|not_provided	OTOG	synonymous_variant	YES	0.536
1:181565656:C:T	.	9	134772587	C	T	COL5A1	intron_variant	1	168	0.00595238	0	0.02	0	0	Benign	not_provided	COL5A1	intron_variant	YES	0.109
1:182528206:A:G	rs77912754	9	135786409	G	A	KCNT1	synonymous_variant	105	168	0.625	0.375	0.42	0.3333	0.36	Benign	Developmental_and_epileptic_encephalopathy,_14|Autosomal_dominant_nocturnal_frontal_lobe_epilepsy_5|Inborn_genetic_diseases|not_specified|not_provided	KCNT1	synonymous_variant	YES	0.144
11:82902733:T:C	rs793274	11	19225738	T	C	E2F8	intron_variant	22	168	0.130952	0.125	0.14	0.1389	0.12	Benign	not_provided	E2F8	missense_variant	NO	18.24
11:82902733:T:C	rs793274	11	19225738	T	C	E2F8	missense_variant	22	168	0.130952	0.125	0.14	0.1389	0.12	Benign	not_provided	E2F8	missense_variant	YES	18.24
11:82902733:T:C	rs793274	11	19225738	T	C	E2F8	non_coding_transcript_exon_variant	22	168	0.130952	0.125	0.14	0.1389	0.12	Benign	not_provided	E2F8	missense_variant	NO	18.24
1:183223989:C:T	rs3124999	9	136501021	C	T	NOTCH1	intron_variant	7	168	0.0416667	0.1563	0.02	0	0.02	Benign	not_provided	NOTCH1	intron_variant	YES	0.969
1:183231160:T:C	rs3124597	9	136508211	T	C	NOTCH1	intron_variant	164	168	0.97619	0.9375	1	1	0.96	Benign	Adams-Oliver_syndrome_5|Aortic_valve_disease_1|not_specified|not_provided	NOTCH1	intron_variant	YES	0.06
1:184084414:G:A	.	9	137449876	G	A	NSMF	intron_variant	2	168	0.0119048	0	0	0.0556	0	Benign	not_provided	NSMF	intron_variant	YES	0.925
1:184184873:A:G	rs149391363	9	137583073	A	G	DPH7	upstream_gene_variant	108	168	0.642857	0.6875	0.56	0.6389	0.7	Benign	not_provided	ZMYND19	synonymous_variant	NO	4.076
1:184184873:A:G	rs149391363	9	137583073	A	G	ZMYND19	synonymous_variant	108	168	0.642857	0.6875	0.56	0.6389	0.7	Benign	not_provided	ZMYND19	synonymous_variant	YES	4.076
1:184647333:C:T	rs140374106	9	138058064	C	T	CACNA1B	non_coding_transcript_exon_variant	8	168	0.047619	0	0.02	0.0833	0.08	Benign	not_provided	CACNA1B	synonymous_variant	NO	1.268
1:184647333:C:T	rs140374106	9	138058064	C	T	CACNA1B	synonymous_variant	8	168	0.047619	0	0.02	0.0833	0.08	Benign	not_provided	CACNA1B	synonymous_variant	YES	1.268
11:8986303:G:A	rs11827718	11	111544009	G	A	LAYN	5_prime_UTR_variant	1	168	0.00595238	0.0313	0	0	0	Benign	not_provided	LAYN	missense_variant,5_prime_UTR_variant	YES	29.5
11:8986303:G:A	rs11827718	11	111544009	G	A	LAYN	missense_variant	1	168	0.00595238	0.0313	0	0	0	Benign	not_provided	LAYN	missense_variant,5_prime_UTR_variant	YES	29.5
11:8986303:G:A	rs11827718	11	111544009	G	A	LAYN	upstream_gene_variant	1	168	0.00595238	0.0313	0	0	0	Benign	not_provided	LAYN	missense_variant,5_prime_UTR_variant	NO	29.5
11:89909908:G:A	.	11	26624264	A	G	ANO3	intron_variant	99	168	0.589286	0.375	0.46	0.4444	0.36	Benign	not_provided	ANO3	intron_variant	YES	4.097
11:89919048:C:T	.	11	26634009	C	T	ANO3	intron_variant	5	168	0.0297619	0.0625	0.02	0.0278	0.02	Benign	not_provided	ANO3	intron_variant	YES	4.571
1:190290992:C:T	rs35244576	22	41220774	C	T	L3MBTL2	synonymous_variant	2	168	0.0119048	0	0.04	0	0	Benign	not_provided	L3MBTL2	synonymous_variant	YES	0.305
11:90971910:C:T	rs78572035	11	27657926	C	T	BDNF	synonymous_variant	5	168	0.0297619	0	0.08	0	0.02	Benign	not_provided	BDNF	synonymous_variant	YES	10.06
11:90973633:C:T	.	11	27659650	C	T	BDNF	intron_variant	4	168	0.0238095	0.125	0	0	0	Benign	not_provided	BDNF	5_prime_UTR_variant,intron_variant	YES	1.66
1:193336913:G:A	rs112036671	22	24525797	G	A	UPB1	3_prime_UTR_variant	2	168	0.0119048	0	0.02	0	0.02	Benign	Deficiency_of_beta-ureidopropionase	UPB1	3_prime_UTR_variant	YES	3.664
1:193428151:C:T	.	22	24615353	T	C	GGT1	intron_variant	165	168	0.982143	0	0	0.0833	0	Benign	not_provided	GGT1	intron_variant	YES	0.107
1:194984773:G:A	rs375873272	22	26003274	G	A	MYO18B	non_coding_transcript_exon_variant	13	168	0.077381	0.1875	0.02	0.0833	0.06	Benign	not_provided	MYO18B	synonymous_variant	NO	1.215
1:194984773:G:A	rs375873272	22	26003274	G	A	MYO18B	synonymous_variant	13	168	0.077381	0.1875	0.02	0.0833	0.06	Benign	not_provided	MYO18B	synonymous_variant	YES	1.215
11:95111126:A:T	.	11	31802060	T	A	PAX6	intron_variant	156	168	0.928571	0	0.08	0.1111	0.08	Benign	not_provided	PAX6	intron_variant	YES	0.001
1:195620333:T:C	.	22	26625394	C	T	CRYBA4	intron_variant	94	168	0.559524	0.5313	0.38	0.4722	0.42	Benign	not_provided	CRYBA4	intron_variant	YES	1.222
11:969733:C:T	.	11	103178909	T	C	DYNC2H1	intron_variant	11	168	0.0654762	1	0.94	0.9167	0.9	Benign	not_provided	DYNC2H1	intron_variant	YES	0.273
11:98202231:G:A	rs2956114	11	34916266	G	A	APIP	missense_variant	2	168	0.0119048	0	0.04	0	0	Benign	Pyruvate_dehydrogenase_E3-binding_protein_deficiency|not_provided	PDHX	missense_variant	NO	21.5
11:98202231:G:A	rs2956114	11	34916266	G	A	PDHX	5_prime_UTR_variant	2	168	0.0119048	0	0.04	0	0	Benign	Pyruvate_dehydrogenase_E3-binding_protein_deficiency|not_provided	PDHX	missense_variant	NO	21.5
11:98202231:G:A	rs2956114	11	34916266	G	A	PDHX	upstream_gene_variant	2	168	0.0119048	0	0.04	0	0	Benign	Pyruvate_dehydrogenase_E3-binding_protein_deficiency|not_provided	PDHX	missense_variant	NO	21.5
11:98599303:T:C	.	11	35317442	C	T	SLC1A2	missense_variant	82	168	0.488095	0.5938	0.66	0.4167	0.38	Benign	not_provided	SLC1A2	missense_variant	YES	14.1
1:199441403:C:T	rs117458738	22	30617387	C	T	TCN2	missense_variant	4	168	0.0238095	0	0.04	0	0.04	Benign	Transcobalamin_II_deficiency	TCN2	missense_variant	YES	0.11
1:199710588:C:T	.	22	30906246	T	C	LOC118146656	intron_variant&non_coding_transcript_variant	164	168	0.97619	0	0.08	0	0	Benign	not_provided	OSBP2	synonymous_variant	NO	9.336
1:199710588:C:T	.	22	30906246	T	C	OSBP2	synonymous_variant	164	168	0.97619	0	0.08	0	0	Benign	not_provided	OSBP2	synonymous_variant	YES	9.336
11:99878581:G:A	rs3740955	11	36574050	A	G	RAG1	missense_variant	167	168	0.994048	0	0	0.0278	0	Benign	Combined_immunodeficiency_with_skin_granulomas|Severe_combined_immunodeficiency,_autosomal_recessive,_T_cell-negative,_B_cell-negative,_NK_cell-positive|Histiocytic_medullary_reticulosis|Immunodeficiency_104|not_specified|not_provided	RAG1	missense_variant	YES	0.967
1:200646323:C:T	rs146449468	22	31906059	C	T	DEPDC5	downstream_gene_variant	2	168	0.0119048	0.0313	0	0	0.02	Benign	Familial_focal_epilepsy_with_variable_foci|Inborn_genetic_diseases|not_specified|not_provided	DEPDC5	non-coding_transcript_variant,synonymous_variant	NO	0.709
1:200646323:C:T	rs146449468	22	31906059	C	T	DEPDC5	non_coding_transcript_exon_variant	2	168	0.0119048	0.0313	0	0	0.02	Benign	Familial_focal_epilepsy_with_variable_foci|Inborn_genetic_diseases|not_specified|not_provided	DEPDC5	non-coding_transcript_variant,synonymous_variant	NO	0.709
1:200646323:C:T	rs146449468	22	31906059	C	T	DEPDC5	synonymous_variant	2	168	0.0119048	0.0313	0	0	0.02	Benign	Familial_focal_epilepsy_with_variable_foci|Inborn_genetic_diseases|not_specified|not_provided	DEPDC5	non-coding_transcript_variant,synonymous_variant	YES	0.709
1:200647009:C:T	.	22	31906744	C	T	DEPDC5	3_prime_UTR_variant	13	168	0.077381	0.0938	0.1	0.0833	0.04	Benign	not_provided	DEPDC5	non-coding_transcript_variant,3_prime_UTR_variant	YES	4.27
1:200647009:C:T	.	22	31906744	C	T	DEPDC5	non_coding_transcript_exon_variant	13	168	0.077381	0.0938	0.1	0.0833	0.04	Benign	not_provided	DEPDC5	non-coding_transcript_variant,3_prime_UTR_variant	NO	4.27
1:202340562:T:C	rs78116727	22	33304162	T	C	LARGE1	intron_variant	116	168	0.690476	0.7188	0.74	0.6111	0.68	Benign	not_provided	LARGE1	intron_variant	YES	0.426
1:204645145:A:G	.	22	35419887	G	A	MCM5	synonymous_variant	150	168	0.892857	0.0313	0.12	0.1667	0.1	Benign	not_provided	MCM5	synonymous_variant	YES	5.53
1:204971167:A:G	rs5999985	22	35726309	G	A	.	intergenic_variant	125	168	0.744048	0.25	0.14	0.3611	0.3	Benign	not_provided	APOL5	missense_variant	NO	8.648
1:205567365:A:G	.	22	36288621	G	A	LOC118147168	upstream_gene_variant	26	168	0.154762	0.75	0.84	0.8611	0.9	Benign	not_provided	MYH9	intron_variant	NO	0.014
1:205567365:A:G	.	22	36288621	G	A	MYH9	intron_variant	26	168	0.154762	0.75	0.84	0.8611	0.9	Benign	not_provided	MYH9	intron_variant	YES	0.014
1:207621617:G:A	rs186918102	22	38302851	G	A	LOC100407384	intron_variant	6	168	0.0357143	0.0938	0.04	0.0278	0	Benign	not_provided	CSNK1E	intron_variant	NO	6.02
1:207951638:A:G	rs8138622	22	38738951	G	A	SUN2	synonymous_variant	167	168	0.994048	0	0.02	0	0	Benign	Emery-Dreifuss_muscular_dystrophy	GTPBP1	synonymous_variant	NO	0.361
1:209995559:C:T	rs73381892	22	19877437	C	T	TXNRD2	intron_variant	83	168	0.494048	0.625	0.42	0.5	0.48	Benign	not_provided	TXNRD2	intron_variant	YES	0.478
1:210080018:A:G	.	22	19971146	G	A	ARVCF	intron_variant	166	168	0.988095	0	0	0	0.04	Benign	not_provided	ARVCF	intron_variant	YES	6.275
1:210080018:A:G	.	22	19971146	G	A	COMT	downstream_gene_variant	166	168	0.988095	0	0	0	0.04	Benign	not_provided	ARVCF	intron_variant	NO	6.275
1:210082011:G:A	rs115736959	22	19973143	G	A	ARVCF	missense_variant	3	168	0.0178571	0.0625	0.02	0	0	Benign	not_provided	ARVCF	missense_variant	YES	22.5
1:210082011:G:A	rs115736959	22	19973143	G	A	COMT	downstream_gene_variant	3	168	0.0178571	0.0625	0.02	0	0	Benign	not_provided	ARVCF	missense_variant	NO	22.5
12:103984895:A:C	rs34700024	10	113654092	C	A	NRAP	missense_variant	165	168	0.982143	0.0313	0.02	0.0278	0	Benign	not_provided	NRAP	missense_variant	YES	2.113
12:111783467:G:A	.	10	120908784	G	A	WDR11	3_prime_UTR_variant	33	168	0.196429	0.3438	0.2	0.25	0.06	Benign	not_provided	WDR11	3_prime_UTR_variant	YES	2.476
12:111783467:G:A	.	10	120908784	G	A	WDR11	non_coding_transcript_exon_variant	33	168	0.196429	0.3438	0.2	0.25	0.06	Benign	not_provided	WDR11	3_prime_UTR_variant	NO	2.476
12:118874861:C:T	.	10	128103894	C	T	MKI67	missense_variant	34	168	0.202381	0.3125	0.04	0.3889	0.16	Benign	not_provided	MKI67	missense_variant	YES	9.303
1:211924382:T:C	rs115467657	22	46389479	A	G	CELSR1	synonymous_variant	56	168	0.333333	0.4063	0.38	0.3333	0.24	Benign	not_provided	CELSR1	synonymous_variant	YES	0.369
1:211956332:G:A	.	22	46364205	C	T	CELSR1	synonymous_variant	105	168	0.625	0.9375	0.66	0.5	0.48	Benign	not_provided	CELSR1	synonymous_variant	YES	0.199
1:211966366:G:A	rs61737827	22	46353858	C	T	LOC100386473	upstream_gene_variant	33	168	0.196429	0.4063	0.2	0.25	0.02	Benign	Acute_infantile_liver_failure_due_to_synthesis_defect_of_mtDNA-encoded_proteins|not_specified|not_provided	TRMU	non-coding_transcript_variant,synonymous_variant	NO	0.929
1:211966366:G:A	rs61737827	22	46353858	C	T	TRMU	synonymous_variant	33	168	0.196429	0.4063	0.2	0.25	0.02	Benign	Acute_infantile_liver_failure_due_to_synthesis_defect_of_mtDNA-encoded_proteins|not_specified|not_provided	TRMU	non-coding_transcript_variant,synonymous_variant	YES	0.929
12:1223189:T:C	.	16	1200820	C	T	CACNA1H	intron_variant	154	168	0.916667	0.0625	0.04	0.0833	0.14	Benign	Idiopathic_generalized_epilepsy|Hyperaldosteronism,_familial,_type_IV|not_provided	CACNA1H	intron_variant	YES	6.478
12:1223189:T:C	.	16	1200820	C	T	CACNA1H	intron_variant&non_coding_transcript_variant	154	168	0.916667	0.0625	0.04	0.0833	0.14	Benign	Idiopathic_generalized_epilepsy|Hyperaldosteronism,_familial,_type_IV|not_provided	CACNA1H	intron_variant	NO	6.478
12:124164780:G:A	rs115473256	10	133273791	G	A	ADAM8	synonymous_variant	2	168	0.0119048	0	0.02	0	0.02	Benign	not_provided	ADAM8	missense_variant,synonymous_variant	YES	0.394
12:124245453:A:G	.	10	133362587	G	A	ECHS1	3_prime_UTR_variant	106	168	0.630952	0.3438	0.26	0.4722	0.42	Benign	not_provided	ECHS1	3_prime_UTR_variant	YES	2.235
12:124245453:A:G	.	10	133362587	G	A	FUOM	upstream_gene_variant	106	168	0.630952	0.3438	0.26	0.4722	0.42	Benign	not_provided	ECHS1	3_prime_UTR_variant	NO	2.235
12:124247278:C:T	.	10	133364815	T	C	ECHS1	intron_variant	12	168	0.0714286	1	0.92	1	0.84	Benign	not_provided	ECHS1	intron_variant	YES	0.017
12:124247278:C:T	.	10	133364815	T	C	FUOM	upstream_gene_variant	12	168	0.0714286	1	0.92	1	0.84	Benign	not_provided	ECHS1	intron_variant	NO	0.017
12:1269292:G:A	rs113045458	16	1258153	G	A	LOC100894324	downstream_gene_variant	1	168	0.00595238	0.0313	0	0	0	Benign	not_provided	TPSD1	synonymous_variant	NO	0.218
1:212763964:A:G	.	22	45533697	T	C	FBLN1	intron_variant	103	168	0.613095	0.7188	0.62	0.6667	0.5	Benign	not_provided	FBLN1	intron_variant	YES	0.306
1:212764153:T:C	.	22	45533511	G	A	FBLN1	intron_variant	108	168	0.642857	0.7188	0.3	0.1667	0.32	Benign	not_provided	FBLN1	intron_variant	YES	0.027
12:12775690:C:T	.	16	13935977	G	A	ERCC4	intron_variant	1	168	0.00595238	0.0313	0	0	0	Benign	not_provided	ERCC4	intron_variant	YES	0.189
12:12775690:C:T	.	16	13935977	G	A	ERCC4	intron_variant&non_coding_transcript_variant	1	168	0.00595238	0.0313	0	0	0	Benign	not_provided	ERCC4	intron_variant	NO	0.189
12:12779094:C:T	.	16	13932504	G	A	ERCC4	intron_variant	1	168	0.00595238	0	0	0.0278	0	Benign	not_provided	ERCC4	intron_variant	YES	1.053
12:12779094:C:T	.	16	13932504	G	A	ERCC4	intron_variant&non_coding_transcript_variant	1	168	0.00595238	0	0	0.0278	0	Benign	not_provided	ERCC4	intron_variant	NO	1.053
12:1487060:G:A	.	16	1456462	A	G	CLCN7	intron_variant	165	168	0.982143	0	0.04	0	0.02	Benign	not_provided	CLCN7	intron_variant	YES	1.512
12:1487060:G:A	.	16	1456462	A	G	CLCN7	intron_variant&non_coding_transcript_variant	165	168	0.982143	0	0.04	0	0.02	Benign	not_provided	CLCN7	intron_variant	NO	1.512
12:1487060:G:A	.	16	1456462	A	G	LOC118146159	downstream_gene_variant	165	168	0.982143	0	0.04	0	0.02	Benign	not_provided	CLCN7	intron_variant	NO	1.512
12:15245925:T:C	rs75012078	16	11550000	G	A	LITAF	intron_variant	167	168	0.994048	0.0313	0	0	0	Benign	not_provided	LITAF	intron_variant	YES	0.898
1:217121565:C:T	rs1321	22	49903787	T	C	ALG12	3_prime_UTR_variant	103	168	0.613095	0.3438	0.36	0.3611	0.46	Benign	ALG12-congenital_disorder_of_glycosylation|not_provided	ALG12	3_prime_UTR_variant	YES	3.654
1:217121565:C:T	rs1321	22	49903787	T	C	ALG12	intron_variant	103	168	0.613095	0.3438	0.36	0.3611	0.46	Benign	ALG12-congenital_disorder_of_glycosylation|not_provided	ALG12	3_prime_UTR_variant	NO	3.654
1:217125389:C:T	.	22	49907603	C	T	ALG12	intron_variant	65	168	0.386905	0.3438	0.36	0.3611	0.46	Benign	not_provided	ALG12	intron_variant	YES	0.346
1:217126787:T:C	.	22	49909227	C	T	ALG12	intron_variant	101	168	0.60119	0.3438	0.36	0.3611	0.5	Benign	ALG12-congenital_disorder_of_glycosylation	ALG12	intron_variant	YES	0.006
12:17201762:C:T	.	16	17258979	G	A	XYLT1	intron_variant	10	168	0.0595238	0.0938	0.12	0	0.02	Benign	Desbuquois_dysplasia_1|Desbuquois_dysplasia_2|not_provided	XYLT1	intron_variant	YES	9.161
1:217404379:G:A	.	22	50220072	A	G	SELENOO	downstream_gene_variant	165	168	0.982143	0	0.02	0	0.04	Benign	not_provided	TUBGCP6	intron_variant	NO	0.635
1:217404379:G:A	.	22	50220072	A	G	TUBGCP6	intron_variant	165	168	0.982143	0	0.02	0	0.04	Benign	not_provided	TUBGCP6	intron_variant	YES	0.635
1:217688628:T:C	.	22	50523425	T	C	NCAPH2	3_prime_UTR_variant	3	168	0.0178571	0	0.02	0	0.04	Benign	not_provided	SCO2	3_prime_UTR_variant	NO	0.312
1:217688628:T:C	.	22	50523425	T	C	NCAPH2	intron_variant	3	168	0.0178571	0	0.02	0	0.04	Benign	not_provided	SCO2	3_prime_UTR_variant	NO	0.312
1:217688628:T:C	.	22	50523425	T	C	SCO2	downstream_gene_variant	3	168	0.0178571	0	0.02	0	0.04	Benign	not_provided	SCO2	3_prime_UTR_variant	NO	0.312
1:217688628:T:C	.	22	50523425	T	C	TYMP	downstream_gene_variant	3	168	0.0178571	0	0.02	0	0.04	Benign	not_provided	SCO2	3_prime_UTR_variant	NO	0.312
1:217694861:G:T	.	22	50529836	T	G	LOC103787955	upstream_gene_variant	118	168	0.702381	0.7188	0.24	0.1944	0.16	Benign	not_provided	TYMP	5_prime_UTR_variant,intron_variant	NO	4.874
1:217694861:G:T	.	22	50529836	T	G	NCAPH2	downstream_gene_variant	118	168	0.702381	0.7188	0.24	0.1944	0.16	Benign	not_provided	TYMP	5_prime_UTR_variant,intron_variant	NO	4.874
1:217694861:G:T	.	22	50529836	T	G	ODF3B	downstream_gene_variant	118	168	0.702381	0.7188	0.24	0.1944	0.16	Benign	not_provided	TYMP	5_prime_UTR_variant,intron_variant	NO	4.874
1:217694861:G:T	.	22	50529836	T	G	SCO2	upstream_gene_variant	118	168	0.702381	0.7188	0.24	0.1944	0.16	Benign	not_provided	TYMP	5_prime_UTR_variant,intron_variant	NO	4.874
1:217694861:G:T	.	22	50529836	T	G	TYMP	intron_variant	118	168	0.702381	0.7188	0.24	0.1944	0.16	Benign	not_provided	TYMP	5_prime_UTR_variant,intron_variant	YES	4.874
12:1817534:A:G	rs3751893	16	1792208	A	G	IGFALS	synonymous_variant	12	168	0.0714286	0.2188	0.04	0	0.06	Benign	Short_stature_due_to_primary_acid-labile_subunit_deficiency|not_provided	IGFALS	non-coding_transcript_variant,synonymous_variant	YES	0.097
12:1817534:A:G	rs3751893	16	1792208	A	G	NUBP2	downstream_gene_variant	12	168	0.0714286	0.2188	0.04	0	0.06	Benign	Short_stature_due_to_primary_acid-labile_subunit_deficiency|not_provided	IGFALS	non-coding_transcript_variant,synonymous_variant	NO	0.097
12:18196766:C:T	rs114401101	16	19074039	C	T	COQ7	splice_region_variant&intron_variant	19	168	0.113095	0.0938	0.12	0.1389	0.1	Benign	not_provided	COQ7	non-coding_transcript_variant,intron_variant	NO	1.688
12:18196766:C:T	rs114401101	16	19074039	C	T	COQ7	splice_region_variant&intron_variant&non_coding_transcript_variant	19	168	0.113095	0.0938	0.12	0.1389	0.1	Benign	not_provided	COQ7	non-coding_transcript_variant,intron_variant	NO	1.688
12:19417388:A:G	rs748849021	16	20346131	A	G	UMOD	synonymous_variant	4	168	0.0238095	0	0.04	0.0556	0	Benign	Familial_juvenile_hyperuricemic_nephropathy_type_1	UMOD	non-coding_transcript_variant,synonymous_variant	YES	6.921
12:19419788:T:C	.	16	20348401	C	T	UMOD	intron_variant	111	168	0.660714	0.25	0.34	0.1389	0.54	Benign	not_provided	UMOD	intron_variant	YES	2.005
12:20093402:T:C	.	16	21261771	C	T	CRYM	intron_variant	94	168	0.559524	0.3125	0.56	0.1667	0.6	Benign	not_provided	CRYM	intron_variant	YES	0.404
12:2152464:C:A	.	16	2437419	G	T	CCNF	intron_variant	6	168	0.0357143	0	0.06	0.0556	0.02	Benign	not_provided	CCNF	intron_variant	YES	0.364
12:22444005:G:A	rs114192994	16	24191086	G	A	PRKCB	splice_region_variant&intron_variant	4	168	0.0238095	0.0625	0	0	0.04	Benign	not_provided	PRKCB	intron_variant	NO	0.192
12:2428404:A:G	rs35667726	16	2114323	C	T	PKD1	synonymous_variant	100	168	0.595238	0.5625	0.38	0.6389	0.16	Benign	Polycystic_kidney_disease|Autosomal_dominant_polycystic_kidney_disease|Polycystic_kidney_disease,_adult_type|not_specified|not_provided	PKD1	synonymous_variant	YES	0.034
12:25743383:A:G	rs74016085	16	27494847	G	A	GTF3C1	synonymous_variant	101	168	0.60119	0.5625	0.46	0.3056	0.3	Benign	not_provided	GTF3C1	synonymous_variant	YES	0.505
12:25894214:A:G	rs61738361	16	27648710	A	G	KATNIP	missense_variant	80	168	0.47619	0.9063	0.34	0.6111	0.24	Benign	not_provided	KATNIP	missense_variant	YES	0.274
12:25894214:A:G	rs61738361	16	27648710	A	G	KATNIP	non_coding_transcript_exon_variant	80	168	0.47619	0.9063	0.34	0.6111	0.24	Benign	not_provided	KATNIP	missense_variant	NO	0.274
12:27093822:C:T	rs147485102	16	30089081	G	A	PPP4C	downstream_gene_variant	13	168	0.077381	0.0938	0.06	0.0278	0.12	Benign	not_provided	TBX6	synonymous_variant	NO	1.389
12:27093822:C:T	rs147485102	16	30089081	G	A	TBX6	synonymous_variant	13	168	0.077381	0.0938	0.06	0.0278	0.12	Benign	not_provided	TBX6	synonymous_variant	YES	1.389
12:27093822:C:T	rs147485102	16	30089081	G	A	YPEL3	downstream_gene_variant	13	168	0.077381	0.0938	0.06	0.0278	0.12	Benign	not_provided	TBX6	synonymous_variant	NO	1.389
12:27344287:C:T	rs142997389	16	29830629	G	A	MVP	missense_variant	3	168	0.0178571	0	0	0.0833	0	Benign	not_provided	MVP	missense_variant	YES	17.65
12:28094069:C:T	rs117210898	16	30902821	C	T	CTF1	3_prime_UTR_variant	3	168	0.0178571	0	0.04	0.0278	0	Benign	not_provided	CTF1	non-coding_transcript_variant,3_prime_UTR_variant	YES	3.917
12:28094069:C:T	rs117210898	16	30902821	C	T	LOC100393705	downstream_gene_variant	3	168	0.0178571	0	0.04	0.0278	0	Benign	not_provided	CTF1	non-coding_transcript_variant,3_prime_UTR_variant	NO	3.917
12:28156146:C:T	rs146323096	16	30965624	C	T	SETD1A	synonymous_variant	21	168	0.125	0.3125	0.08	0.1667	0.02	Benign	not_provided	SETD1A	synonymous_variant	YES	6.778
12:3465618:C:T	rs116498263	16	3581247	C	T	LOC103796522	upstream_gene_variant	13	168	0.077381	0.1563	0.08	0.0278	0.06	Benign	Fanconi_anemia_complementation_group_P	SLX4	3_prime_UTR_variant	NO	5.992
12:3465618:C:T	rs116498263	16	3581247	C	T	NLRC3	upstream_gene_variant	13	168	0.077381	0.1563	0.08	0.0278	0.06	Benign	Fanconi_anemia_complementation_group_P	SLX4	3_prime_UTR_variant	NO	5.992
12:3465618:C:T	rs116498263	16	3581247	C	T	SLX4	3_prime_UTR_variant	13	168	0.077381	0.1563	0.08	0.0278	0.06	Benign	Fanconi_anemia_complementation_group_P	SLX4	3_prime_UTR_variant	YES	5.992
12:3563414:C:T	rs139522807	16	3664371	C	T	LOC118146503	upstream_gene_variant	2	168	0.0119048	0.0625	0	0	0	Benign	not_provided	DNASE1	missense_variant	NO	7.487
12:3563414:C:T	rs139522807	16	3664371	C	T	TRAP1	missense_variant	2	168	0.0119048	0.0625	0	0	0	Benign	not_provided	DNASE1	missense_variant	NO	7.487
12:3563414:C:T	rs139522807	16	3664371	C	T	TRAP1	non_coding_transcript_exon_variant	2	168	0.0119048	0.0625	0	0	0	Benign	not_provided	DNASE1	missense_variant	NO	7.487
1:23564363:C:T	rs61745206	13	108666025	C	T	MYO16	synonymous_variant	71	168	0.422619	0.25	0.42	0.4444	0.52	Benign	not_provided	MYO16	synonymous_variant	YES	1.422
12:37236031:G:A	rs61733241	10	48969242	C	T	WDFY4	synonymous_variant	1	168	0.00595238	0	0.02	0	0	Benign	not_provided	WDFY4	synonymous_variant	YES	0.016
12:4694824:G:A	rs113245789	16	4798611	G	A	GLYR1	downstream_gene_variant	2	168	0.0119048	0	0	0.0556	0	Benign	Amelocerebrohypohidrotic_syndrome	ROGDI	non-coding_transcript_variant,synonymous_variant	NO	0.65
12:4694824:G:A	rs113245789	16	4798611	G	A	ROGDI	synonymous_variant	2	168	0.0119048	0	0	0.0556	0	Benign	Amelocerebrohypohidrotic_syndrome	ROGDI	non-coding_transcript_variant,synonymous_variant	YES	0.65
12:4694824:G:A	rs113245789	16	4798611	G	A	SEPTIN12	upstream_gene_variant	2	168	0.0119048	0	0	0.0556	0	Benign	Amelocerebrohypohidrotic_syndrome	ROGDI	non-coding_transcript_variant,synonymous_variant	NO	0.65
12:4694824:G:A	rs113245789	16	4798611	G	A	SMIM22	downstream_gene_variant	2	168	0.0119048	0	0	0.0556	0	Benign	Amelocerebrohypohidrotic_syndrome	ROGDI	non-coding_transcript_variant,synonymous_variant	NO	0.65
12:4771585:C:T	rs35657330	16	4877083	C	T	UBN1	missense_variant	2	168	0.0119048	0.0625	0	0	0	Benign	not_provided	UBN1	synonymous_variant	NO	0.112
12:4771585:C:T	rs35657330	16	4877083	C	T	UBN1	synonymous_variant	2	168	0.0119048	0.0625	0	0	0	Benign	not_provided	UBN1	synonymous_variant	YES	0.112
1:25037196:C:T	.	13	110179104	T	C	COL4A1	intron_variant	165	168	0.982143	0.0625	0	0	0.02	Benign	not_provided	COL4A1	intron_variant	YES	6.007
1:25323667:T:C	rs369918222	13	110467105	C	T	COL4A2	intron_variant	74	168	0.440476	0.625	0.8	0.3333	0.44	Benign	Porencephaly_2	COL4A2	intron_variant	YES	4.815
12:55498918:A:G	rs115217058	10	72062886	C	T	SPOCK2	synonymous_variant	164	168	0.97619	0	0.04	0	0.04	Benign	not_provided	SPOCK2	synonymous_variant	YES	0.086
12:55798951:G:A	rs73275848	10	71730457	C	T	CDH23	intron_variant	4	168	0.0238095	0.0313	0.04	0	0.02	Benign	Usher_syndrome_type_1D|Autosomal_recessive_nonsyndromic_hearing_loss_12|not_specified|not_provided	CDH23	intron_variant	YES	0.09
12:615950:G:C	.	16	582699	C	G	PIGQ	intron_variant	165	168	0.982143	0	0.04	0	0.02	Benign	not_provided	PIGQ	intron_variant	YES	0.135
12:615950:G:C	.	16	582699	C	G	RAB40C	upstream_gene_variant	165	168	0.982143	0	0.04	0	0.02	Benign	not_provided	PIGQ	intron_variant	NO	0.135
12:64640095:G:A	rs34798625	10	63215561	C	T	JMJD1C	5_prime_UTR_variant	8	168	0.047619	0.0625	0.08	0.0278	0.02	Benign	Early_myoclonic_encephalopathy	JMJD1C	missense_variant,non-coding_transcript_variant,5_prime_UTR_variant	YES	0.095
12:64640095:G:A	rs34798625	10	63215561	C	T	JMJD1C	intron_variant	8	168	0.047619	0.0625	0.08	0.0278	0.02	Benign	Early_myoclonic_encephalopathy	JMJD1C	missense_variant,non-coding_transcript_variant,5_prime_UTR_variant	NO	0.095
12:64640095:G:A	rs34798625	10	63215561	C	T	JMJD1C	missense_variant	8	168	0.047619	0.0625	0.08	0.0278	0.02	Benign	Early_myoclonic_encephalopathy	JMJD1C	missense_variant,non-coding_transcript_variant,5_prime_UTR_variant	YES	0.095
12:64640095:G:A	rs34798625	10	63215561	C	T	JMJD1C	synonymous_variant	8	168	0.047619	0.0625	0.08	0.0278	0.02	Benign	Early_myoclonic_encephalopathy	JMJD1C	missense_variant,non-coding_transcript_variant,5_prime_UTR_variant	NO	0.095
12:77692076:C:T	rs141604779	10	87714139	C	T	PAPSS2	synonymous_variant	4	168	0.0238095	0	0.06	0	0.02	Benign	Spondyloepimetaphyseal_dysplasia,_PAPSS2_type	PAPSS2	synonymous_variant	YES	2.746
12:77701452:G:A	.	10	87727048	A	G	LOC118146590	upstream_gene_variant	22	168	0.130952	1	0.9	0.9722	0.68	Benign	not_provided	PAPSS2	intron_variant	NO	0.721
12:77701452:G:A	.	10	87727048	A	G	PAPSS2	intron_variant	22	168	0.130952	1	0.9	0.9722	0.68	Benign	not_provided	PAPSS2	intron_variant	YES	0.721
1:28269029:G:A	rs148880361	13	113520698	G	A	TMCO3	non_coding_transcript_exon_variant	1	168	0.00595238	0	0	0.0278	0	Benign	not_provided	TMCO3	non-coding_transcript_variant,synonymous_variant,intron_variant	NO	0.588
1:28269029:G:A	rs148880361	13	113520698	G	A	TMCO3	synonymous_variant	1	168	0.00595238	0	0	0.0278	0	Benign	not_provided	TMCO3	non-coding_transcript_variant,synonymous_variant,intron_variant	YES	0.588
12:85922006:G:A	rs41299157	10	95687353	A	G	TCTN3	splice_region_variant&non_coding_transcript_exon_variant	158	168	0.940476	0.0938	0.08	0.0278	0.04	Benign	Orofacial-digital_syndrome_IV|Joubert_syndrome_18|not_specified|not_provided	TCTN3	synonymous_variant,intron_variant	NO	12.07
12:85922006:G:A	rs41299157	10	95687353	A	G	TCTN3	splice_region_variant&synonymous_variant	158	168	0.940476	0.0938	0.08	0.0278	0.04	Benign	Orofacial-digital_syndrome_IV|Joubert_syndrome_18|not_specified|not_provided	TCTN3	synonymous_variant,intron_variant	NO	12.07
12:91094702:C:T	.	10	100806757	T	C	PAX2	intron_variant	167	168	0.994048	0	0	0	0.02	Benign	not_provided	PAX2	intron_variant	YES	0.799
12:93411348:C:T	rs2275271	10	103054405	T	C	CNNM2	downstream_gene_variant	156	168	0.928571	0.0313	0.14	0.0556	0.04	Benign	Renal_hypomagnesemia_6|Hypomagnesemia,_seizures,_and_intellectual_disability_1|not_provided	CNNM2	synonymous_variant	NO	10.05
12:93411348:C:T	rs2275271	10	103054405	T	C	CNNM2	non_coding_transcript_exon_variant	156	168	0.928571	0.0313	0.14	0.0556	0.04	Benign	Renal_hypomagnesemia_6|Hypomagnesemia,_seizures,_and_intellectual_disability_1|not_provided	CNNM2	synonymous_variant	NO	10.05
12:93411348:C:T	rs2275271	10	103054405	T	C	CNNM2	synonymous_variant	156	168	0.928571	0.0313	0.14	0.0556	0.04	Benign	Renal_hypomagnesemia_6|Hypomagnesemia,_seizures,_and_intellectual_disability_1|not_provided	CNNM2	synonymous_variant	YES	10.05
13:101249291:T:C	.	18	62138957	C	T	PIGN	intron_variant	165	168	0.982143	0	0	0.0833	0	Benign	Multiple_congenital_anomalies-hypotonia-seizures_syndrome_1|not_provided	PIGN	intron_variant	YES	2.746
13:101249291:T:C	.	18	62138957	C	T	PIGN	intron_variant&non_coding_transcript_variant	165	168	0.982143	0	0	0.0833	0	Benign	Multiple_congenital_anomalies-hypotonia-seizures_syndrome_1|not_provided	PIGN	intron_variant	NO	2.746
13:102583984:C:T	.	18	63476801	T	C	SERPINB5	5_prime_UTR_variant	166	168	0.988095	0	0.04	0	0	Benign	not_provided	SERPINB5		NO	19.32
13:108865776:A:G	.	18	70075565	G	A	RTTN	intron_variant	158	168	0.940476	0.0938	0.1	0.0278	0.02	Benign	Microcephalic_primordial_dwarfism_due_to_RTTN_deficiency|not_provided	RTTN	intron_variant	YES	3.933
13:108865776:A:G	.	18	70075565	G	A	RTTN	intron_variant&non_coding_transcript_variant	158	168	0.940476	0.0938	0.1	0.0278	0.02	Benign	Microcephalic_primordial_dwarfism_due_to_RTTN_deficiency|not_provided	RTTN	intron_variant	NO	3.933
13:11073563:C:T	rs9331939	8	27599960	G	A	CLU	synonymous_variant	5	168	0.0297619	0	0	0.1389	0	Benign	not_provided	CLU	non-coding_transcript_variant,synonymous_variant	YES	0.728
13:11073563:C:T	rs9331939	8	27599960	G	A	HAVCR1	downstream_gene_variant	5	168	0.0297619	0	0	0.1389	0	Benign	not_provided	CLU	non-coding_transcript_variant,synonymous_variant	NO	0.728
13:111152305:C:T	.	18	72541942	C	T	CBLN2	missense_variant	2	168	0.0119048	0	0.02	0	0.02	Benign	not_provided	CBLN2	synonymous_variant	NO	12.11
13:111152305:C:T	.	18	72541942	C	T	CBLN2	non_coding_transcript_exon_variant	2	168	0.0119048	0	0.02	0	0.02	Benign	not_provided	CBLN2	synonymous_variant	NO	12.11
13:111152305:C:T	.	18	72541942	C	T	CBLN2	synonymous_variant	2	168	0.0119048	0	0.02	0	0.02	Benign	not_provided	CBLN2	synonymous_variant	YES	12.11
13:118003118:C:T	.	18	79451764	T	C	NFATC1	synonymous_variant	167	168	0.994048	0.0313	0	0	0	Benign	not_provided	NFATC1	synonymous_variant	YES	1.592
13:118271290:T:C	rs35925235	18	79704874	C	T	CTDP1	non_coding_transcript_exon_variant	52	168	0.309524	0.875	0.72	0.6111	0.6	Benign	not_provided	CTDP1	synonymous_variant	NO	1.374
13:118271290:T:C	rs35925235	18	79704874	C	T	CTDP1	synonymous_variant	52	168	0.309524	0.875	0.72	0.6111	0.6	Benign	not_provided	CTDP1	synonymous_variant	YES	1.374
13:118278153:C:T	rs375464090	18	79710446	C	T	CTDP1	intron_variant	1	168	0.00595238	0	0.02	0	0	Benign	not_provided	CTDP1	intron_variant	YES	0.752
13:118278153:C:T	rs375464090	18	79710446	C	T	CTDP1	intron_variant&non_coding_transcript_variant	1	168	0.00595238	0	0.02	0	0	Benign	not_provided	CTDP1	intron_variant	NO	0.752
13:118278153:C:T	rs375464090	18	79710446	C	T	LOC118146944	downstream_gene_variant	1	168	0.00595238	0	0.02	0	0	Benign	not_provided	CTDP1	intron_variant	NO	0.752
13:118278153:C:T	rs375464090	18	79710446	C	T	LOC118146944	non_coding_transcript_exon_variant	1	168	0.00595238	0	0.02	0	0	Benign	not_provided	CTDP1	intron_variant	NO	0.752
13:15460706:C:G	.	8	23008132	G	C	RHOBTB2	intron_variant	10	168	0.0595238	0.125	0	0.1389	0.02	Benign	not_provided	RHOBTB2	intron_variant	YES	0.163
13:1650432:A:G	.	8	1859698	A	G	ARHGEF10	intron_variant	72	168	0.428571	0.4375	0.54	0.3056	0.4	Benign	not_provided	ARHGEF10	intron_variant	YES	0.334
13:1721743:G:A	.	8	1928669	G	A	ARHGEF10	intron_variant	26	40	0.65	1	0.6	1	0.2857	Benign	not_provided	ARHGEF10	intron_variant	YES	1.776
13:1745971:G:A	rs7832438	8	1952689	A	G	ARHGEF10	intron_variant	163	168	0.970238	0	0.06	0	0.04	Benign	Autosomal_dominant_slowed_nerve_conduction_velocity|not_specified|not_provided	ARHGEF10	intron_variant	YES	0.069
13:1753474:G:A	rs139084783	8	1957143	G	A	ARHGEF10	synonymous_variant	1	168	0.00595238	0	0	0.0278	0	Benign	not_provided	ARHGEF10	synonymous_variant	YES	0.28
13:20740626:C:T	rs34871936	8	17874367	A	G	FGL1	synonymous_variant	133	168	0.791667	0.25	0.12	0.4167	0.12	Benign	not_provided	FGL1	synonymous_variant	YES	5.016
13:25273561:C:T	.	8	13500078	G	A	DLC1	5_prime_UTR_variant	2	168	0.0119048	0.0625	0	0	0	Benign	not_provided	DLC1	5_prime_UTR_variant	YES	11.18
13:25461769:A:G	.	8	13305032	C	T	DLC1	intron_variant	34	168	0.202381	0.7813	0.88	0.8889	0.66	Benign	not_provided	DLC1	3_prime_UTR_variant,intron_variant	YES	0.439
13:28814048:T:C	.	8	30703370	C	T	GSR	intron_variant	142	168	0.845238	0.125	0.12	0.3056	0.1	Benign	not_provided	GSR	intron_variant	YES	0.015
13:29180216:G:A	.	8	31058111	G	A	WRN	intron_variant	5	168	0.0297619	0.0625	0.04	0	0.02	Benign	not_provided	WRN	intron_variant	YES	6.261
13:29180216:G:A	.	8	31058111	G	A	WRN	upstream_gene_variant	5	168	0.0297619	0.0625	0.04	0	0.02	Benign	not_provided	WRN	intron_variant	NO	6.261
13:2923400:G:A	rs61740651	8	3219289	G	A	CSMD1	synonymous_variant	18	168	0.107143	0.0625	0.08	0.0833	0.18	Benign	not_provided	CSMD1	synonymous_variant	YES	0.186
13:39620273:G:A	.	8	41692353	G	A	ANK1	intron_variant	54	168	0.321429	0.2813	0.36	0.3333	0.3	Benign	not_provided	ANK1	intron_variant	YES	0.971
13:39620273:G:A	.	8	41692353	G	A	LOC118146808	upstream_gene_variant	54	168	0.321429	0.2813	0.36	0.3333	0.3	Benign	not_provided	ANK1	intron_variant	NO	0.971
13:47009343:G:A	.	18	11825227	C	T	GNAL	intron_variant	2	168	0.0119048	0	0	0.0556	0	Benign	not_provided	GNAL	intron_variant	YES	0.404
13:52296643:C:T	.	18	6959329	G	A	LAMA1	intron_variant	1	168	0.00595238	0	0	0.0278	0	Benign	not_provided	LAMA1	intron_variant	YES	0.266
13:63058825:C:T	rs142574930	18	23838858	T	C	LAMA3	synonymous_variant	166	168	0.988095	0.0313	0	0.0278	0	Benign	not_provided	LAMA3	synonymous_variant	YES	0.233
13:63080087:A:G	.	18	23861520	G	A	LAMA3	intron_variant	158	168	0.940476	0.0625	0.1	0.0556	0.02	Benign	not_provided	LAMA3	intron_variant	YES	0.232
13:7292922:G:A	rs3735819	8	11748803	T	C	GATA4	intron_variant	166	168	0.988095	0	0	0	0.04	Benign	Congenital_heart_disease|not_specified|not_provided	GATA4	intron_variant	YES	5.174
13:7476233:C:G	.	8	11564780	G	C	BLK	downstream_gene_variant	2	168	0.0119048	0	0	0	0.04	Benign	not_provided	BLK		NO	3.102
13:7495341:G:A	rs7836533	8	11550225	C	T	BLK	synonymous_variant	4	168	0.0238095	0.0313	0	0.0833	0	Benign	Systemic_lupus_erythematosus|Maturity-onset_diabetes_of_the_young_type_11|not_specified|not_provided	BLK	synonymous_variant	YES	0.307
13:7495341:G:A	rs7836533	8	11550225	C	T	LOC118146725	downstream_gene_variant	4	168	0.0238095	0.0313	0	0.0833	0	Benign	Systemic_lupus_erythematosus|Maturity-onset_diabetes_of_the_young_type_11|not_specified|not_provided	BLK	synonymous_variant	NO	0.307
13:7499923:C:T	rs367628135	8	11549098	G	A	BLK	missense_variant	2	168	0.0119048	0	0.04	0	0	Benign	Systemic_lupus_erythematosus	BLK	missense_variant	YES	16.92
13:7499923:C:T	rs367628135	8	11549098	G	A	LOC118146725	downstream_gene_variant	2	168	0.0119048	0	0.04	0	0	Benign	Systemic_lupus_erythematosus	BLK	missense_variant	NO	16.92
13:75445150:C:T	.	18	36215769	C	T	MOCOS	missense_variant	2	168	0.0119048	0	0	0.0556	0	Benign	Xanthinuria_type_II	MOCOS	missense_variant	YES	4.073
13:75842880:C:T	.	18	36594474	C	T	FHOD3	intron_variant	13	168	0.077381	0.0313	0.08	0.1944	0.02	Benign	not_provided	FHOD3	intron_variant	YES	0.002
13:75914717:A:G	.	18	36652694	G	A	FHOD3	intron_variant	73	168	0.434524	0.7813	0.5	0.7222	0.38	Benign	not_provided	FHOD3	missense_variant,intron_variant	YES	0.73
13:75914717:A:G	.	18	36652694	G	A	FHOD3	missense_variant	73	168	0.434524	0.7813	0.5	0.7222	0.38	Benign	not_provided	FHOD3	missense_variant,intron_variant	YES	0.73
13:8402672:G:A	rs73662876	8	10611926	C	T	RP1L1	synonymous_variant	63	168	0.375	0.375	0.36	0.5	0.3	Benign	Occult_macular_dystrophy	RP1L1	synonymous_variant	YES	0.023
13:84167684:G:A	rs145549368	18	45038580	G	A	SETBP1	missense_variant	11	168	0.0654762	0.0625	0	0.2222	0.02	Benign	not_provided	SETBP1	missense_variant	YES	0.508
13:85265633:G:A	.	18	46089521	G	A	ATP5F1A	intron_variant	56	168	0.333333	0.2188	0.3	0.3333	0.44	Benign	not_provided	ATP5F1A	intron_variant	YES	0.274
13:85265633:G:A	.	18	46089521	G	A	LOC118147047	downstream_gene_variant	56	168	0.333333	0.2188	0.3	0.3333	0.44	Benign	not_provided	ATP5F1A	intron_variant	NO	0.274
13:85723660:C:T	.	18	46534510	T	C	LOXHD1	intron_variant	92	168	0.547619	0.2813	0.44	0.4444	0.58	Benign	Autosomal_recessive_nonsyndromic_hearing_loss_77|not_provided	LOXHD1	intron_variant	YES	4.099
13:89118529:A:G	.	18	49837547	A	G	MYO5B	missense_variant	4	168	0.0238095	0.0313	0	0	0.06	Benign	not_provided	MYO5B	missense_variant	YES	22.4
13:89574781:C:T	rs76722120	18	50261232	C	T	CFAP53	missense_variant	2	168	0.0119048	0	0	0.0556	0	Benign	Heterotaxy,_visceral,_6,_autosomal|not_specified	CFAP53	missense_variant	YES	26.5
1:39008148:A:G	.	13	75292525	C	T	TBC1D4	intron_variant	55	168	0.327381	0.5938	0.84	0.6111	0.6	Benign	not_provided	TBC1D4	intron_variant	YES	0.12
13:98564258:A:G	rs61745250	18	59439755	G	A	CCBE1	missense_variant	107	168	0.636905	0.4375	0.4	0.3611	0.28	Benign	Hennekam_lymphangiectasia-lymphedema_syndrome_1|not_specified|not_provided	CCBE1	synonymous_variant	NO	0.841
13:98564258:A:G	rs61745250	18	59439755	G	A	CCBE1	synonymous_variant	107	168	0.636905	0.4375	0.4	0.3611	0.28	Benign	Hennekam_lymphangiectasia-lymphedema_syndrome_1|not_specified|not_provided	CCBE1	synonymous_variant	YES	0.841
13:98601268:A:G	.	18	59469652	G	A	CCBE1	intron_variant	165	168	0.982143	0	0	0.0833	0	Benign	not_provided	CCBE1	intron_variant	YES	0.015
14:101742095:G:A	rs113903638	2	10047766	C	T	KLF11	synonymous_variant	82	168	0.488095	0.4375	0.52	0.4167	0.54	Benign	Maturity-onset_diabetes_of_the_young_type_7|not_specified|not_provided	KLF11	synonymous_variant	YES	0.521
14:101742095:G:A	rs113903638	2	10047766	C	T	LOC108588295	upstream_gene_variant	82	168	0.488095	0.4375	0.52	0.4167	0.54	Benign	Maturity-onset_diabetes_of_the_young_type_7|not_specified|not_provided	KLF11	synonymous_variant	NO	0.521
14:102949806:C:T	.	2	8800273	G	A	KIDINS220	intron_variant	19	168	0.113095	0.0625	0.02	0.1944	0.18	Benign	not_provided	KIDINS220	intron_variant	YES	0.215
14:110216173:A:G	.	2	1683685	T	C	PXDN	5_prime_UTR_variant	98	168	0.583333	0.5625	0.64	0.75	0.42	Benign	Anterior_segment_dysgenesis_7	PXDN	synonymous_variant	NO	2.934
14:110216173:A:G	.	2	1683685	T	C	PXDN	synonymous_variant	98	168	0.583333	0.5625	0.64	0.75	0.42	Benign	Anterior_segment_dysgenesis_7	PXDN	synonymous_variant	YES	2.934
14:110227963:T:C	.	2	1673994	G	A	PXDN	intron_variant	38	168	0.22619	0.875	0.78	0.8611	0.64	Benign	not_provided	PXDN	intron_variant	YES	0.048
14:110237163:G:A	rs200996147	2	1666392	C	T	PXDN	synonymous_variant	42	168	0.25	0.3125	0.32	0.1667	0.2	Benign	Anterior_segment_dysgenesis_7	PXDN	synonymous_variant	YES	0.434
14:110272144:A:G	.	2	1638681	T	C	PXDN	downstream_gene_variant	91	168	0.541667	0.5938	0.56	0.75	0.34	Benign	not_provided	PXDN	intron_variant	NO	0.323
14:12472107:G:A	rs137869171	2	105363295	G	A	FHL2	synonymous_variant	155	168	0.922619	0.9375	0.88	0.9444	0.94	Benign	Primary_dilated_cardiomyopathy|Cardiomyopathy|not_specified	FHL2	synonymous_variant	YES	9.172
14:17724532:A:G	rs374379957	2	110163043	A	G	NPHP1	splice_region_variant&intron_variant	67	168	0.39881	0.4375	0.42	0.3611	0.38	Benign	Nephronophthisis|not_specified	NPHP1	intron_variant	NO	1.933
14:17724560:A:G	rs200201945	2	110163071	G	A	NPHP1	missense_variant	70	168	0.416667	0.75	0.6	0.6389	0.42	Benign	Nephronophthisis|not_specified	NPHP1	missense_variant	YES	15.85
14:18636310:G:A	rs28947200	2	112918606	C	T	IL37	missense_variant	6	168	0.0357143	0.0313	0.1	0	0	Benign	not_provided	IL37	missense_variant	YES	19.09
14:3134446:G:A	rs191970829	2	96253306	G	A	TMEM127	3_prime_UTR_variant	17	168	0.10119	0.1875	0.06	0.2222	0	Benign	Pheochromocytoma	TMEM127	3_prime_UTR_variant	YES	0.12
14:4883526:T:C	rs148593890	2	98370056	C	T	CNGA3	synonymous_variant	128	168	0.761905	0.1875	0.18	0.1944	0.36	Benign	not_provided	CNGA3	synonymous_variant	YES	0.508
14:55557684:C:T	rs146554440	2	55646457	G	A	PNPT1	synonymous_variant	20	168	0.119048	0.3438	0.1	0.0278	0.06	Benign	not_specified|not_provided	PNPT1	synonymous_variant	YES	9.534
14:64529201:G:A	.	2	47024559	T	C	TTC7A	intron_variant	167	168	0.994048	0	0	0.0278	0	Benign	not_provided	TTC7A	intron_variant	YES	0.019
14:81175161:C:T	.	2	31350061	C	T	XDH	missense_variant	2	168	0.0119048	0.0625	0	0	0	Benign	Xanthinuria_type_II	XDH	missense_variant	YES	23.4
14:81191939:C:T	.	2	31370029	C	T	XDH	intron_variant	50	168	0.297619	0.5625	0.3	0.1667	0.22	Benign	not_provided	XDH	intron_variant	YES	1.118
14:82619522:C:T	rs2256740	2	29232401	A	G	ALK	synonymous_variant	167	168	0.994048	0	0	0.0278	0	Benign	Neuroblastoma,_susceptibility_to,_3|Hereditary_cancer-predisposing_syndrome|not_specified|not_provided	ALK	synonymous_variant	YES	1.977
14:82619522:C:T	rs2256740	2	29232401	A	G	ALK	upstream_gene_variant	167	168	0.994048	0	0	0.0278	0	Benign	Neuroblastoma,_susceptibility_to,_3|Hereditary_cancer-predisposing_syndrome|not_specified|not_provided	ALK	synonymous_variant	NO	1.977
14:82622547:C:G	.	2	29229372	C	G	ALK	intron_variant	166	168	0.988095	0.0625	0	0	0	Benign	not_provided	ALK	intron_variant	YES	2.94
14:83257464:T:C	rs73922186	2	28591141	G	A	PLB1	synonymous_variant	159	168	0.946429	0.0625	0.1	0.0556	0	Benign	not_provided	PLB1	non-coding_transcript_variant,synonymous_variant	YES	0.081
14:84758152:T:C	.	2	27056145	A	G	AGBL5	splice_region_variant&intron_variant	41	168	0.244048	0.4688	0.18	0.25	0.16	Benign	not_provided	AGBL5	intron_variant	NO	2.286
14:84758152:T:C	.	2	27056145	A	G	AGBL5	splice_region_variant&intron_variant&non_coding_transcript_variant	41	168	0.244048	0.4688	0.18	0.25	0.16	Benign	not_provided	AGBL5	intron_variant	NO	2.286
14:84758152:T:C	.	2	27056145	A	G	OST4	downstream_gene_variant	41	168	0.244048	0.4688	0.18	0.25	0.16	Benign	not_provided	AGBL5	intron_variant	NO	2.286
14:84758152:T:C	.	2	27056145	A	G	TRNAA-AGC	downstream_gene_variant	41	168	0.244048	0.4688	0.18	0.25	0.16	Benign	not_provided	AGBL5	intron_variant	NO	2.286
14:85311365:G:A	.	2	26495311	C	T	OTOF	intron_variant	53	168	0.315476	0.4375	0.34	0.3889	0.16	Benign	not_provided	OTOF	intron_variant	YES	7.518
15:10664659:G:A	.	3	187236497	A	G	MASP1	intron_variant	80	168	0.47619	0.5313	0.46	0.8333	0.36	Benign	3MC_syndrome_1|not_provided	MASP1	non-coding_transcript_variant,synonymous_variant,intron_variant	YES	0.686
15:10664659:G:A	.	3	187236497	A	G	MASP1	intron_variant&non_coding_transcript_variant	80	168	0.47619	0.5313	0.46	0.8333	0.36	Benign	3MC_syndrome_1|not_provided	MASP1	non-coding_transcript_variant,synonymous_variant,intron_variant	NO	0.686
15:10664659:G:A	.	3	187236497	A	G	MASP1	synonymous_variant	80	168	0.47619	0.5313	0.46	0.8333	0.36	Benign	3MC_syndrome_1|not_provided	MASP1	non-coding_transcript_variant,synonymous_variant,intron_variant	YES	0.686
15:20337357:G:A	rs35207939	3	43079944	G	A	GASK1A	downstream_gene_variant	17	168	0.10119	0.0625	0.18	0.0833	0.06	Benign	Muscular_dystrophy-dystroglycanopathy_(congenital_with_brain_and_eye_anomalies),_type_a,_8|not_specified|not_provided	POMGNT2	synonymous_variant	NO	0.271
15:20337357:G:A	rs35207939	3	43079944	G	A	POMGNT2	synonymous_variant	17	168	0.10119	0.0625	0.18	0.0833	0.06	Benign	Muscular_dystrophy-dystroglycanopathy_(congenital_with_brain_and_eye_anomalies),_type_a,_8|not_specified|not_provided	POMGNT2	synonymous_variant	YES	0.271
15:22122591:G:A	rs13326552	3	44906988	G	A	TGM4	missense_variant	3	168	0.0178571	0.0625	0	0	0.02	Benign	not_provided	TGM4	missense_variant	YES	12.87
15:22729135:G:A	rs267219	3	45524373	G	A	LARS2	downstream_gene_variant	1	168	0.00595238	0.0313	0	0	0	Benign	not_provided	LARS2	intron_variant	NO	0.1
15:22729135:G:A	rs267219	3	45524373	G	A	LARS2	intron_variant	1	168	0.00595238	0.0313	0	0	0	Benign	not_provided	LARS2	intron_variant	YES	0.1
15:22971549:C:T	.	3	45760234	C	T	SLC6A20	intron_variant	3	168	0.0178571	0	0	0	0.06	Benign	not_provided	SLC6A20	intron_variant	YES	0.448
15:22980758:T:C	.	3	45771158	C	T	SLC6A20	intron_variant	162	168	0.964286	0.125	0	0	0.04	Benign	not_provided	SLC6A20	intron_variant	YES	0.089
15:23164741:C:T	.	3	45966712	C	T	FYCO1	synonymous_variant	1	168	0.00595238	0	0	0.0278	0	Benign	Cataract_18	FYCO1	non-coding_transcript_variant,synonymous_variant	YES	3.191
15:23173500:C:T	.	3	45975452	C	T	FYCO1	intron_variant	1	168	0.00595238	0	0	0.0278	0	Benign	not_provided	FYCO1	intron_variant	YES	4.271
15:27338001:C:T	rs12488302	3	50303895	C	T	HYAL1	5_prime_UTR_variant	26	168	0.154762	0.2188	0.2	0.1667	0.06	Benign	Deficiency_of_hyaluronoglucosaminidase	HYAL1	5_prime_UTR_variant	YES	0.995
15:27338001:C:T	rs12488302	3	50303895	C	T	HYAL1	intron_variant	26	168	0.154762	0.2188	0.2	0.1667	0.06	Benign	Deficiency_of_hyaluronoglucosaminidase	HYAL1	5_prime_UTR_variant	NO	0.995
15:27338001:C:T	rs12488302	3	50303895	C	T	HYAL1	upstream_gene_variant	26	168	0.154762	0.2188	0.2	0.1667	0.06	Benign	Deficiency_of_hyaluronoglucosaminidase	HYAL1	5_prime_UTR_variant	NO	0.995
15:27338001:C:T	rs12488302	3	50303895	C	T	HYAL2	downstream_gene_variant	26	168	0.154762	0.2188	0.2	0.1667	0.06	Benign	Deficiency_of_hyaluronoglucosaminidase	HYAL1	5_prime_UTR_variant	NO	0.995
15:27338001:C:T	rs12488302	3	50303895	C	T	HYAL3	upstream_gene_variant	26	168	0.154762	0.2188	0.2	0.1667	0.06	Benign	Deficiency_of_hyaluronoglucosaminidase	HYAL1	5_prime_UTR_variant	NO	0.995
15:27338001:C:T	rs12488302	3	50303895	C	T	NAA80	upstream_gene_variant	26	168	0.154762	0.2188	0.2	0.1667	0.06	Benign	Deficiency_of_hyaluronoglucosaminidase	HYAL1	5_prime_UTR_variant	NO	0.995
15:29380349:C:T	rs200962458	3	52396681	C	T	BAP1	downstream_gene_variant	1	168	0.00595238	0.0313	0	0	0	Benign	Ciliary_dyskinesia,_primary,_37|Spermatogenic_failure_18|not_provided	DNAH1	missense_variant	NO	25.9
15:29380349:C:T	rs200962458	3	52396681	C	T	DNAH1	intron_variant	1	168	0.00595238	0.0313	0	0	0	Benign	Ciliary_dyskinesia,_primary,_37|Spermatogenic_failure_18|not_provided	DNAH1	missense_variant	NO	25.9
15:29380349:C:T	rs200962458	3	52396681	C	T	DNAH1	intron_variant&non_coding_transcript_variant	1	168	0.00595238	0.0313	0	0	0	Benign	Ciliary_dyskinesia,_primary,_37|Spermatogenic_failure_18|not_provided	DNAH1	missense_variant	NO	25.9
15:29380349:C:T	rs200962458	3	52396681	C	T	DNAH1	missense_variant	1	168	0.00595238	0.0313	0	0	0	Benign	Ciliary_dyskinesia,_primary,_37|Spermatogenic_failure_18|not_provided	DNAH1	missense_variant	YES	25.9
15:29380349:C:T	rs200962458	3	52396681	C	T	DNAH1	non_coding_transcript_exon_variant	1	168	0.00595238	0.0313	0	0	0	Benign	Ciliary_dyskinesia,_primary,_37|Spermatogenic_failure_18|not_provided	DNAH1	missense_variant	NO	25.9
15:29380349:C:T	rs200962458	3	52396681	C	T	LOC108588421	downstream_gene_variant	1	168	0.00595238	0.0313	0	0	0	Benign	Ciliary_dyskinesia,_primary,_37|Spermatogenic_failure_18|not_provided	DNAH1	missense_variant	NO	25.9
15:30113703:T:C	.	3	53106587	T	C	RFT1	intron_variant	17	168	0.10119	0.0625	0.06	0.0278	0.22	Benign	not_provided	RFT1	intron_variant	YES	5.442
15:30196872:C:T	rs182290450	3	53189254	C	T	PRKCD	splice_region_variant&intron_variant	6	168	0.0357143	0.1875	0	0	0	Benign	Autoimmune_lymphoproliferative_syndrome,_type_III_caused_by_mutation_in_PRKCD	PRKCD	intron_variant	NO	7.423
15:30700182:C:T	.	3	53718501	C	T	CACNA1D	intron_variant	13	168	0.077381	0.0313	0.1	0.0556	0.1	Benign	not_provided	CACNA1D	intron_variant	YES	0.241
15:30729806:G:A	.	3	53747042	G	A	CACNA1D	intron_variant	39	168	0.232143	0.4063	0.22	0.1111	0.22	Benign	not_provided	CACNA1D	intron_variant	YES	0.027
15:34400777:A:G	.	3	58131997	G	A	FLNB	intron_variant	135	168	0.803571	0.1563	0.18	0.4167	0.08	Benign	not_provided	FLNB	synonymous_variant,intron_variant	YES	7.312
15:34400777:A:G	.	3	58131997	G	A	FLNB	non_coding_transcript_exon_variant	135	168	0.803571	0.1563	0.18	0.4167	0.08	Benign	not_provided	FLNB	synonymous_variant,intron_variant	NO	7.312
15:34400777:A:G	.	3	58131997	G	A	FLNB	synonymous_variant	135	168	0.803571	0.1563	0.18	0.4167	0.08	Benign	not_provided	FLNB	synonymous_variant,intron_variant	YES	7.312
15:42657143:C:T	rs9847478	3	66370223	C	T	SLC25A26	intron_variant	1	168	0.00595238	0	0	0.0278	0	Benign	not_provided	SLC25A26	intron_variant	YES	0.544
15:42657143:C:T	rs9847478	3	66370223	C	T	SLC25A26	intron_variant&non_coding_transcript_variant	1	168	0.00595238	0	0	0.0278	0	Benign	not_provided	SLC25A26	intron_variant	NO	0.544
15:56409319:C:T	.	3	4777704	C	T	ITPR1	intron_variant	1	168	0.00595238	0.0313	0	0	0	Benign	not_provided	ITPR1	intron_variant	YES	0.519
15:58824719:G:A	rs78137319	3	7306645	G	A	GRM7	non_coding_transcript_exon_variant	3	168	0.0178571	0.0938	0	0	0	Benign	not_provided	GRM7	synonymous_variant	NO	0.059
15:58824719:G:A	rs78137319	3	7306645	G	A	GRM7	synonymous_variant	3	168	0.0178571	0.0938	0	0	0	Benign	not_provided	GRM7	synonymous_variant	YES	0.059
15:60422991:G:A	.	3	8734038	G	A	CAV3	intron_variant	13	168	0.077381	0.0313	0.08	0.1944	0.02	Benign	not_provided	CAV3	intron_variant	YES	1.169
15:61997863:G:A	.	3	10338260	G	A	ATP2B2	synonymous_variant	3	168	0.0178571	0.0625	0	0	0.02	Benign	not_provided	ATP2B2	synonymous_variant	YES	5.548
15:62001840:G:A	.	3	10342741	G	A	ATP2B2	intron_variant	4	168	0.0238095	0	0	0.0278	0.06	Benign	not_provided	ATP2B2	intron_variant	YES	0.445
15:62017088:C:T	.	3	10358569	C	T	ATP2B2	intron_variant	3	168	0.0178571	0	0	0	0.06	Benign	not_provided	ATP2B2	intron_variant	YES	0.716
15:62679928:G:A	rs183069336	3	11017349	G	A	SLC6A1	synonymous_variant	1	168	0.00595238	0	0	0	0.02	Benign	Myoclonic-atonic_epilepsy|Inborn_genetic_diseases|not_provided	SLC6A1	synonymous_variant,intron_variant	YES	1.201
15:62684715:G:A	.	3	11022177	G	A	SLC6A1	intron_variant	33	168	0.196429	0.0313	0.48	0.0833	0.1	Benign	not_provided	SLC6A1	intron_variant	YES	0.8
15:64085005:G:A	rs200776552	3	12434052	G	A	PPARG	synonymous_variant	7	168	0.0416667	0	0.12	0	0.02	Benign	not_provided	PPARG	synonymous_variant,3_prime_UTR_variant	YES	0.925
15:65448130:T:C	.	3	13854787	C	T	WNT7A	synonymous_variant	164	168	0.97619	0	0.06	0	0.02	Benign	not_provided	WNT7A	synonymous_variant	YES	5.006
15:65583295:G:A	.	3	14125163	G	A	CHCHD4	upstream_gene_variant	7	168	0.0416667	0.0625	0.06	0	0.04	Benign	not_provided	TMEM43	5_prime_UTR_variant	NO	13.8
15:65583295:G:A	.	3	14125163	G	A	TMEM43	5_prime_UTR_variant	7	168	0.0416667	0.0625	0.06	0	0.04	Benign	not_provided	TMEM43	5_prime_UTR_variant	YES	13.8
15:65589346:C:T	rs3964375	3	14131474	C	T	TMEM43	intron_variant	5	168	0.0297619	0.125	0	0	0.02	Benign	not_provided	TMEM43	intron_variant	YES	4.094
15:70652202:C:T	rs116834403	3	127196922	G	A	C15H3orf56	synonymous_variant	39	168	0.232143	0.0938	0.4	0.1389	0.22	Benign	not_provided	PRR23E	synonymous_variant	NO	0.299
15:70851270:G:A	.	3	127004999	C	T	PLXNA1	synonymous_variant	3	168	0.0178571	0.0625	0	0	0.02	Benign	not_provided	PLXNA1	synonymous_variant	YES	6.643
15:72871018:G:A	rs116515655	3	124658451	C	T	KALRN	synonymous_variant	4	168	0.0238095	0	0.06	0	0.02	Benign	not_provided	KALRN	synonymous_variant	YES	3.836
15:74247554:A:G	.	3	123295922	C	T	ADCY5	intron_variant	165	168	0.982143	0.0625	0	0	0.02	Benign	not_provided	ADCY5	intron_variant	YES	0.383
15:75607141:G:A	.	3	121797218	C	T	IQCB1	missense_variant	4	168	0.0238095	0	0.02	0	0.06	Benign	Nephronophthisis	IQCB1	missense_variant,non-coding_transcript_variant,intron_variant	YES	18.37
15:75607141:G:A	.	3	121797218	C	T	IQCB1	non_coding_transcript_exon_variant	4	168	0.0238095	0	0.02	0	0.06	Benign	Nephronophthisis	IQCB1	missense_variant,non-coding_transcript_variant,intron_variant	NO	18.37
15:77455015:G:A	.	3	119905634	C	T	GSK3B	intron_variant	2	168	0.0119048	0	0.02	0	0.02	Benign	not_provided	GSK3B	intron_variant	YES	0.499
15:77737406:C:T	rs116815407	3	119619597	G	A	LOC103788381	downstream_gene_variant	6	168	0.0357143	0	0.04	0	0.08	Benign	not_provided	PLA1A	non-coding_transcript_variant,synonymous_variant	NO	1.643
15:77737406:C:T	rs116815407	3	119619597	G	A	PLA1A	non_coding_transcript_exon_variant	6	168	0.0357143	0	0.04	0	0.08	Benign	not_provided	PLA1A	non-coding_transcript_variant,synonymous_variant	NO	1.643
15:77737406:C:T	rs116815407	3	119619597	G	A	PLA1A	synonymous_variant	6	168	0.0357143	0	0.04	0	0.08	Benign	not_provided	PLA1A	non-coding_transcript_variant,synonymous_variant	YES	1.643
15:84241381:G:A	rs146543713	3	98593168	G	A	CPOX	synonymous_variant	13	168	0.077381	0.0938	0.06	0	0.14	Benign	Hereditary_coproporphyria|not_provided	CPOX	synonymous_variant	YES	5.768
15:84241772:C:G	rs115030377	3	98593559	C	G	CPOX	5_prime_UTR_variant	10	168	0.0595238	0.0625	0.1	0.0278	0.04	Benign	Hereditary_coproporphyria	CPOX	5_prime_UTR_variant	YES	1.593
15:93983884:A:G	rs201473403	3	108428663	A	G	MYH15	synonymous_variant	36	168	0.214286	0.3125	0.28	0.0833	0.18	Benign	not_provided	MYH15	synonymous_variant	YES	2.682
15:9468753:T:C	rs116523688	3	186048726	C	T	ETV5	synonymous_variant	132	168	0.785714	0.4688	0.2	0.0833	0.16	Benign	not_provided	ETV5	synonymous_variant	YES	0.344
16:10813684:G:A	.	8	55953893	G	A	LYN	synonymous_variant	6	168	0.0357143	0.0313	0.08	0	0.02	Benign	not_provided	LYN	synonymous_variant	YES	10.2
16:11792738:C:T	rs141905474	8	56963435	C	T	BPNT2	3_prime_UTR_variant	4	168	0.0238095	0.0938	0	0	0.02	Benign	Chondrodysplasia_with_joint_dislocations,_gPAPP_type	BPNT2	3_prime_UTR_variant	YES	6.656
16:14749660:G:A	.	8	60232587	A	G	CA8	intron_variant	133	168	0.791667	0.1875	0.26	0.1667	0.2	Benign	not_provided	CA8	intron_variant	YES	0.233
16:23915290:G:A	.	8	69705189	G	A	SLCO5A1	synonymous_variant	5	168	0.0297619	0.0313	0	0	0.08	Benign	not_provided	SLCO5A1	synonymous_variant	YES	6.358
16:52028889:G:A	.	8	144059941	C	T	OPLAH	missense_variant	4	168	0.0238095	0.125	0	0	0	Benign	5-Oxoprolinase_deficiency	OPLAH	missense_variant	YES	15.38
16:52157848:C:T	rs541882395	8	143920479	G	A	PLEC	synonymous_variant	10	168	0.0595238	0.125	0.02	0.0556	0.06	Benign	Epidermolysis_bullosa_simplex,_Ogna_type|Epidermolysis_bullosa_simplex_5B,_with_muscular_dystrophy|Epidermolysis_bullosa_simplex_5C,_with_pyloric_atresia|Autosomal_recessive_limb-girdle_muscular_dystrophy_type_2Q|Epidermolysis_bullosa_simplex_with_nail_dystrophy	PLEC	synonymous_variant	YES	0.038
16:53348753:C:T	rs3802232	8	142665282	G	A	JRK	synonymous_variant	6	168	0.0357143	0	0	0.0833	0.06	Benign	not_provided	JRK	synonymous_variant	YES	0.526
1:65474201:T:C	.	13	49555479	A	G	RCBTB1	intron_variant	15	168	0.0892857	0.1875	0.04	0.1111	0.06	Benign	RCBTB1-related_retinopathy|not_provided	RCBTB1	intron_variant	YES	2.048
16:56019777:C:T	.	8	139988839	G	A	TRAPPC9	intron_variant	3	168	0.0178571	0	0.04	0.0278	0	Benign	not_provided	TRAPPC9	intron_variant	YES	11.96
16:56019777:C:T	.	8	139988839	G	A	TRAPPC9	splice_region_variant&intron_variant	3	168	0.0178571	0	0.04	0.0278	0	Benign	not_provided	TRAPPC9	intron_variant	NO	11.96
16:62985764:A:G	.	8	132873309	T	C	TG	intron_variant	17	168	0.10119	0.1875	0.06	0.1111	0.08	Benign	not_provided	TG	intron_variant	YES	0.083
16:63735617:T:C	rs11785257	8	132121756	G	A	KCNQ3	3_prime_UTR_variant	145	168	0.863095	0.125	0.2	0.0278	0.16	Benign	Seizures,_benign_familial_neonatal,_2|Benign_neonatal_seizures	KCNQ3	3_prime_UTR_variant	YES	0.164
16:70657987:A:G	.	8	125072995	C	T	WASHC5	intron_variant	161	168	0.958333	0.0313	0.02	0	0.1	Benign	not_provided	WASHC5	intron_variant	YES	0.932
16:93786368:G:A	rs34332949	8	101558785	C	T	GRHL2	synonymous_variant	2	168	0.0119048	0.0313	0	0.0278	0	Benign	not_specified|not_provided	GRHL2	synonymous_variant	YES	6.607
16:95066457:G:A	.	8	100240234	C	T	SPAG1	intron_variant	14	168	0.0833333	0.0625	0.14	0	0.1	Benign	not_provided	SPAG1	intron_variant	YES	0.047
16:97077095:C:A	.	8	98128151	T	G	POP1	intron_variant	91	168	0.541667	0.4063	0.58	0.4167	0.4	Benign	not_provided	POP1	intron_variant	YES	8.533
1:70369135:T:C	rs138464551	9	93663633	C	T	PHF2	splice_region_variant&synonymous_variant	55	168	0.327381	0.5625	0.62	0.7778	0.72	Benign	not_provided	PHF2	synonymous_variant	NO	0.843
17:12445715:T:C	.	3	167790233	A	G	SERPINI1	intron_variant	50	168	0.297619	0.5313	0.28	0.25	0.2	Benign	not_provided	SERPINI1	intron_variant	YES	0.012
17:12504465:C:T	rs3792293	3	167734716	A	G	PDCD10	intron_variant	155	168	0.922619	0.0938	0.14	0.0278	0.04	Benign	not_specified|not_provided	PDCD10	5_prime_UTR_variant,intron_variant	YES	6.736
17:12504465:C:T	rs3792293	3	167734716	A	G	PDCD10	upstream_gene_variant	155	168	0.922619	0.0938	0.14	0.0278	0.04	Benign	not_specified|not_provided	PDCD10	5_prime_UTR_variant,intron_variant	NO	6.736
17:12504465:C:T	rs3792293	3	167734716	A	G	SERPINI1	upstream_gene_variant	155	168	0.922619	0.0938	0.14	0.0278	0.04	Benign	not_specified|not_provided	PDCD10	5_prime_UTR_variant,intron_variant	NO	6.736
17:18765937:C:T	rs35990253	3	159995428	G	A	IL12A	missense_variant	17	168	0.10119	0.2813	0.14	0.0278	0	Benign	not_provided	IL12A	missense_variant	YES	19.08
17:27017335:C:T	.	3	151436826	G	A	IGSF10	missense_variant	28	168	0.166667	0	0.16	0.1667	0.28	Benign	not_provided	IGSF10	missense_variant	YES	0.93
17:27017335:C:T	.	3	151436826	G	A	MED12L	downstream_gene_variant	28	168	0.166667	0	0.16	0.1667	0.28	Benign	not_provided	IGSF10	missense_variant	NO	0.93
17:29300380:A:G	.	3	149181783	T	C	LOC100404354	intron_variant	6	168	0.0357143	0	0.04	0	0.08	Benign	not_provided	CP	intron_variant	NO	0.415
17:29300380:A:G	.	3	149181783	T	C	LOC100404354	intron_variant&non_coding_transcript_variant	6	168	0.0357143	0	0.04	0	0.08	Benign	not_provided	CP	intron_variant	NO	0.415
17:39494294:T:C	.	3	138067854	G	A	DZIP1L	intron_variant	6	168	0.0357143	0.9688	1	1	0.9	Benign	not_provided	DZIP1L	intron_variant	YES	1.96
17:39494294:T:C	.	3	138067854	G	A	DZIP1L	intron_variant&non_coding_transcript_variant	6	168	0.0357143	0.9688	1	1	0.9	Benign	not_provided	DZIP1L	intron_variant	NO	1.96
1:74260987:C:T	rs2231775	9	90613675	G	A	DIRAS2	synonymous_variant	83	168	0.494048	0.3125	0.6	0.5	0.5	Benign	not_provided	DIRAS2	synonymous_variant	YES	6.085
17:46995274:A:G	rs6787083	3	130376649	C	T	COL6A5	synonymous_variant	167	168	0.994048	0	0	0.0278	0	Benign	not_provided	COL6A5	non-coding_transcript_variant,synonymous_variant	YES	0.463
1:74805219:A:G	rs55790757	9	87707112	C	T	DAPK1	synonymous_variant	126	168	0.75	0.2813	0.32	0.1667	0.22	Benign	not_provided	DAPK1	synonymous_variant	YES	0.872
17:55526110:C:T	rs35608037	3	23918510	C	T	NKIRAS1	upstream_gene_variant	130	168	0.77381	0.8125	0.76	0.6944	0.82	Benign	not_provided	RPL15	synonymous_variant	NO	4.62
17:55526110:C:T	rs35608037	3	23918510	C	T	RPL15	synonymous_variant	130	168	0.77381	0.8125	0.76	0.6944	0.82	Benign	not_provided	RPL15	synonymous_variant	YES	4.62
17:62147720:C:T	rs2228048	3	30672350	C	T	TGFBR2	synonymous_variant	45	168	0.267857	0.125	0.26	0.4167	0.26	Benign	Marfan_syndrome|Loeys-Dietz_syndrome_2|Loeys-Dietz_syndrome|Familial_thoracic_aortic_aneurysm_and_aortic_dissection|not_specified|Cardiovascular_phenotype	TGFBR2	synonymous_variant	YES	0.117
17:64463591:C:T	rs7610916	3	33069164	T	C	GLB1	intron_variant	166	168	0.988095	0	0	0.0556	0	Benign	not_provided	GLB1	intron_variant	YES	0.111
17:68191568:A:G	rs63750271	3	37040279	A	G	MLH1	missense_variant	3	168	0.0178571	0	0.02	0	0.04	Benign	Carcinoma_of_colon|Lynch_syndrome|Hereditary_cancer-predisposing_syndrome|Hereditary_nonpolyposis_colorectal_neoplasms|not_provided	MLH1	missense_variant	YES	23.8
17:68191568:A:G	rs63750271	3	37040279	A	G	MLH1	non_coding_transcript_exon_variant	3	168	0.0178571	0	0.02	0	0.04	Benign	Carcinoma_of_colon|Lynch_syndrome|Hereditary_cancer-predisposing_syndrome|Hereditary_nonpolyposis_colorectal_neoplasms|not_provided	MLH1	missense_variant	NO	23.8
17:69122920:T:C	.	3	38010450	T	C	PLCD1	synonymous_variant	101	168	0.60119	0.7813	0.58	0.6944	0.44	Benign	not_provided	PLCD1	non-coding_transcript_variant,synonymous_variant	YES	1.148
17:69122920:T:C	.	3	38010450	T	C	VILL	downstream_gene_variant	101	168	0.60119	0.7813	0.58	0.6944	0.44	Benign	not_provided	PLCD1	non-coding_transcript_variant,synonymous_variant	NO	1.148
17:69210393:T:C	rs193282675	3	38097833	C	T	DLEC1	non_coding_transcript_exon_variant	28	168	0.166667	0.9375	0.84	0.8056	0.78	Benign	not_provided	DLEC1	synonymous_variant	NO	0.772
17:69210393:T:C	rs193282675	3	38097833	C	T	DLEC1	synonymous_variant	28	168	0.166667	0.9375	0.84	0.8056	0.78	Benign	not_provided	DLEC1	synonymous_variant	YES	0.772
17:69600639:C:T	rs1046048	3	38483251	C	T	ACVR2B	splice_region_variant&synonymous_variant	3	168	0.0178571	0	0.06	0	0	Benign	Heterotaxy,_visceral,_4,_autosomal|not_specified|not_provided	ACVR2B	synonymous_variant	NO	8.397
17:69675134:C:T	rs7374391	3	38556844	C	T	SCN5A	intron_variant	4	168	0.0238095	0	0	0	0.08	Benign	not_provided	SCN5A	intron_variant	YES	4.933
17:70027506:T:C	.	3	38897242	C	T	SCN11A	intron_variant	37	168	0.220238	0.5938	0.86	0.9167	0.72	Benign	Hereditary_sensory_and_autonomic_neuropathy_type_7|Familial_episodic_pain_syndrome_with_predominantly_lower_limb_involvement	SCN11A	intron_variant	YES	0.04
17:70508814:C:T	.	3	39408574	C	T	LOC118149049	upstream_gene_variant	9	168	0.0535714	0	0.08	0.1389	0	Benign	Familial_isolated_congenital_asplenia	RPSA	intron_variant	NO	3.896
17:70508814:C:T	.	3	39408574	C	T	LOC118149051	downstream_gene_variant	9	168	0.0535714	0	0.08	0.1389	0	Benign	Familial_isolated_congenital_asplenia	RPSA	intron_variant	NO	3.896
17:70508814:C:T	.	3	39408574	C	T	RPSA	intron_variant	9	168	0.0535714	0	0.08	0.1389	0	Benign	Familial_isolated_congenital_asplenia	RPSA	intron_variant	YES	3.896
17:74208598:G:A	rs145738445	3	196058621	C	T	TFRC	synonymous_variant	25	168	0.14881	0.0625	0.22	0.1944	0.1	Benign	not_provided	TFRC	synonymous_variant	YES	0.823
17:74208930:C:T	rs151279600	3	196058287	G	A	TFRC	synonymous_variant	19	168	0.113095	0.0625	0.12	0.1944	0.08	Benign	not_provided	TFRC	synonymous_variant	YES	8.722
1:78665693:C:T	.	9	96240603	C	T	HSD17B3	intron_variant	1	168	0.00595238	0	0	0.0278	0	Benign	not_provided	HSD17B3	intron_variant	YES	0.906
18:10101467:C:T	.	1	156135378	C	T	LMNA	intron_variant	1	168	0.00595238	0	0.02	0	0	Benign	not_provided	LMNA	intron_variant	YES	0.272
18:10102444:C:T	rs505058	1	156136394	T	C	LMNA	synonymous_variant	159	168	0.946429	0.1563	0	0.0556	0.04	Benign	Cardiomyopathy|Dilated_cardiomyopathy_1A|Familial_partial_lipodystrophy,_Dunnigan_type|Hutchinson-Gilford_syndrome|Mandibuloacral_dysplasia_with_type_A_lipodystrophy|Charcot-Marie-Tooth_disease_type_2B1|Congenital_muscular_dystrophy_due_to_LMNA_mutation|Charcot-Marie-Tooth_disease|Emery-Dreifuss_muscular_dystrophy|Charcot-Marie-Tooth_disease_type_2|Benign_scapuloperoneal_muscular_dystrophy_with_c…	LMNA	synonymous_variant	YES	5.621
18:10573249:T:C	.	1	156594106	T	C	GPATCH4	downstream_gene_variant	6	168	0.0357143	0.0938	0.02	0.0556	0	Benign	Encephalopathy,_progressive,_early-onset,_with_brain_edema_and/or_leukoencephalopathy,_1|not_provided	NAXE	3_prime_UTR_variant	NO	11.26
18:10573249:T:C	.	1	156594106	T	C	NAXE	3_prime_UTR_variant	6	168	0.0357143	0.0938	0.02	0.0556	0	Benign	Encephalopathy,_progressive,_early-onset,_with_brain_edema_and/or_leukoencephalopathy,_1|not_provided	NAXE	3_prime_UTR_variant	YES	11.26
18:12321815:C:T	rs2251969	1	158612856	T	C	OR10Z1	downstream_gene_variant	123	168	0.732143	0.2188	0.34	0.3333	0.18	Benign	Pyropoikilocytosis,_hereditary|Elliptocytosis_2|Hereditary_spherocytosis_type_3|not_specified|not_provided	SPTA1	synonymous_variant	NO	6.835
18:12321815:C:T	rs2251969	1	158612856	T	C	SPTA1	synonymous_variant	123	168	0.732143	0.2188	0.34	0.3333	0.18	Benign	Pyropoikilocytosis,_hereditary|Elliptocytosis_2|Hereditary_spherocytosis_type_3|not_specified|not_provided	SPTA1	synonymous_variant	YES	6.835
18:12357530:G:T	rs3738791	1	158636659	G	T	SPTA1	synonymous_variant	50	168	0.297619	0.4375	0.3	0.3889	0.14	Benign	Pyropoikilocytosis,_hereditary|Elliptocytosis_2|Hereditary_spherocytosis_type_3|not_specified|not_provided	SPTA1	synonymous_variant	YES	2.361
18:12929957:G:A	rs2298805	1	159304153	G	A	FCER1A	missense_variant	4	168	0.0238095	0.0313	0.02	0	0.04	Benign	not_provided	FCER1A	missense_variant,intron_variant	YES	22.8
18:13565687:G:A	rs61757715	1	160031734	G	A	PIGM	non_coding_transcript_exon_variant	1	168	0.00595238	0	0	0.0278	0	Benign	Hypercoagulability_syndrome_due_to_glycosylphosphatidylinositol_deficiency|not_specified	PIGM	synonymous_variant	NO	10.55
18:13565687:G:A	rs61757715	1	160031734	G	A	PIGM	synonymous_variant	1	168	0.00595238	0	0	0.0278	0	Benign	Hypercoagulability_syndrome_due_to_glycosylphosphatidylinositol_deficiency|not_specified	PIGM	synonymous_variant	YES	10.55
18:16730406:G:A	rs16855642	1	180266593	C	T	LHX4	splice_region_variant&synonymous_variant	1	168	0.00595238	0	0.02	0	0	Benign	Short_stature-pituitary_and_cerebellar_defects-small_sella_turcica_syndrome|not_specified|not_provided	LHX4	synonymous_variant	NO	8.343
18:20172112:A:G	rs34429842	1	176671099	C	T	PAPPA2	synonymous_variant	164	168	0.97619	0	0	0.1111	0	Benign	not_provided	PAPPA2	synonymous_variant	YES	4.549
18:27643120:G:A	.	1	168291325	C	T	TBX19	synonymous_variant	3	168	0.0178571	0	0	0	0.06	Benign	not_provided	TBX19	synonymous_variant	YES	7.889
18:27800392:C:T	rs115455892	1	168104776	G	A	GPR161	synonymous_variant	55	168	0.327381	0.2813	0.38	0.5278	0.16	Benign	not_provided	GPR161	synonymous_variant,intron_variant	YES	0.366
18:28045592:A:G	.	1	167854274	T	C	ADCY10	intron_variant	1	168	0.00595238	0	0	0.0278	0	Benign	not_provided	ADCY10	intron_variant	YES	1.804
18:30169109:C:T	.	1	165249296	A	G	LMX1A	intron_variant	36	168	0.214286	0.75	0.82	0.8611	0.72	Benign	not_provided	LMX1A	intron_variant	YES	0.221
18:32645370:C:T	rs61743748	1	162587615	G	A	UAP1	synonymous_variant	31	168	0.184524	0.4063	0.14	0.1389	0.12	Benign	not_provided	UAP1	non-coding_transcript_variant,synonymous_variant	YES	1.076
18:33685959:C:A	.	1	181798847	C	A	CACNA1E	3_prime_UTR_variant	3	168	0.0178571	0	0	0.0833	0	Benign	not_provided	CACNA1E	3_prime_UTR_variant	YES	15.71
18:33685959:C:A	.	1	181798847	C	A	CACNA1E	downstream_gene_variant	3	168	0.0178571	0	0	0.0833	0	Benign	not_provided	CACNA1E	3_prime_UTR_variant	NO	15.71
18:34611190:G:A	rs115885941	1	182822206	G	A	LOC118149219	intron_variant&non_coding_transcript_variant	1	168	0.00595238	0	0	0.0278	0	Benign	not_provided	NPL	intron_variant	NO	0.819
18:34611190:G:A	rs115885941	1	182822206	G	A	LOC118149219	non_coding_transcript_exon_variant	1	168	0.00595238	0	0	0.0278	0	Benign	not_provided	NPL	intron_variant	NO	0.819
18:34611190:G:A	rs115885941	1	182822206	G	A	NPL	splice_region_variant&intron_variant	1	168	0.00595238	0	0	0.0278	0	Benign	not_provided	NPL	intron_variant	NO	0.819
18:34898679:G:A	.	1	183122264	G	A	LAMC1	intron_variant	1	168	0.00595238	0	0	0.0278	0	Benign	not_provided	LAMC1	intron_variant	YES	4.225
18:34901558:T:C	.	1	183125179	T	C	LAMC1	intron_variant	61	168	0.363095	0.4688	0.28	0.6667	0.16	Benign	not_provided	LAMC1	intron_variant	YES	0.544
18:35003433:C:T	.	1	183222514	C	T	LAMC2	intron_variant	1	168	0.00595238	0.0313	0	0	0	Benign	not_provided	LAMC2	intron_variant	YES	2.378
18:3536966:A:G	.	1	150081222	G	A	VPS45	intron_variant	41	168	0.244048	0.6563	0.66	0.8056	0.88	Benign	not_provided	VPS45	intron_variant	YES	9.178
18:3992974:G:A	rs41317513	1	150552949	G	A	ADAMTSL4	missense_variant	5	168	0.0297619	0	0	0	0.1	Benign	Ectopia_lentis_2,_isolated,_autosomal_recessive|not_provided	ADAMTSL4	missense_variant	YES	24.2
18:3992974:G:A	rs41317513	1	150552949	G	A	LOC103788965	downstream_gene_variant	5	168	0.0297619	0	0	0	0.1	Benign	Ectopia_lentis_2,_isolated,_autosomal_recessive|not_provided	ADAMTSL4	missense_variant	NO	24.2
18:4582700:C:G	rs76172995	1	151159060	C	G	LYSMD1	downstream_gene_variant	10	168	0.0595238	0.1875	0.04	0.0278	0.02	Benign	not_provided	TNFAIP8L2	synonymous_variant,intron_variant	NO	1.511
18:4582700:C:G	rs76172995	1	151159060	C	G	TNFAIP8L2	downstream_gene_variant	10	168	0.0595238	0.1875	0.04	0.0278	0.02	Benign	not_provided	TNFAIP8L2	synonymous_variant,intron_variant	NO	1.511
18:4582700:C:G	rs76172995	1	151159060	C	G	TNFAIP8L2	missense_variant	10	168	0.0595238	0.1875	0.04	0.0278	0.02	Benign	not_provided	TNFAIP8L2	synonymous_variant,intron_variant	NO	1.511
18:6468784:G:A	rs2011331	1	152313526	T	C	FLG	missense_variant	160	168	0.952381	0.0938	0.06	0	0.04	Benign	not_specified|not_provided	FLG	missense_variant,non-coding_transcript_variant	YES	0.736
18:7297512:G:A	rs142436988	1	153298104	G	A	LOC103788982	intron_variant	5	168	0.0297619	0	0.08	0	0.02	Benign	not_provided	PGLYRP3	missense_variant	NO	20.7
18:7297512:G:A	rs142436988	1	153298104	G	A	PGLYRP3	missense_variant	5	168	0.0297619	0	0.08	0	0.02	Benign	not_provided	PGLYRP3	missense_variant	YES	20.7
1:88421153:C:T	.	9	74660693	G	A	RORB	synonymous_variant	18	168	0.107143	0.1875	0.06	0.0556	0.14	Benign	not_provided	RORB	synonymous_variant	YES	1.458
19:10611609:C:T	rs6660707	1	215813752	G	A	USH2A	synonymous_variant	7	168	0.0416667	0	0.08	0	0.06	Benign	Usher_syndrome_type_2A|not_specified|not_provided	USH2A	synonymous_variant	YES	0.199
19:15330874:C:T	.	1	211018552	G	A	KCNH1	intron_variant	3	168	0.0178571	0.0313	0	0	0.04	Benign	not_provided	KCNH1	intron_variant	YES	0.068
19:15644957:C:T	rs140491301	1	210683641	G	A	HHAT	downstream_gene_variant	2	168	0.0119048	0	0.02	0	0.02	Benign	not_provided	KCNH1	synonymous_variant	NO	1.037
19:15644957:C:T	rs140491301	1	210683641	G	A	HHAT	intron_variant&non_coding_transcript_variant	2	168	0.0119048	0	0.02	0	0.02	Benign	not_provided	KCNH1	synonymous_variant	NO	1.037
19:15644957:C:T	rs140491301	1	210683641	G	A	KCNH1	synonymous_variant	2	168	0.0119048	0	0.02	0	0.02	Benign	not_provided	KCNH1	synonymous_variant	YES	1.037
19:19525123:G:C	.	1	226891521	C	G	PSEN2	intron_variant	1	168	0.00595238	0	0	0.0278	0	Benign	not_provided	PSEN2	intron_variant	YES	1.279
19:19531511:G:A	rs1046240	1	226883824	C	T	PSEN2	synonymous_variant	2	168	0.0119048	0	0.02	0	0.02	Benign	Alzheimer_disease_4|Dilated_cardiomyopathy_1V|not_specified|not_provided	PSEN2	synonymous_variant	YES	3.714
19:25209614:C:T	.	1	201062075	C	T	CACNA1S	synonymous_variant	34	168	0.202381	0.25	0.06	0.2222	0.3	Benign	Malignant_hyperthermia,_susceptibility_to,_5|Hypokalemic_periodic_paralysis,_type_1	CACNA1S	synonymous_variant	YES	7.016
19:25214123:G:A	rs16847623	1	201066301	G	A	CACNA1S	synonymous_variant	15	168	0.0892857	0.125	0.04	0.1111	0.1	Benign	Malignant_hyperthermia,_susceptibility_to,_5|Hypokalemic_periodic_paralysis,_type_1|not_specified|not_provided	CACNA1S	synonymous_variant	YES	0.355
19:25526273:T:C	rs141517560	1	201386371	C	T	LAD1	synonymous_variant	164	168	0.97619	0.125	0	0	0	Benign	not_provided	LAD1	synonymous_variant	YES	1.179
19:26765980:G:A	.	1	202601790	G	A	SYT2	intron_variant	2	168	0.0119048	0	0.02	0	0.02	Benign	not_provided	SYT2	intron_variant	YES	0.03
19:27046010:G:A	rs6688917	1	202881095	G	A	RABIF	synonymous_variant	14	168	0.0833333	0.1563	0.16	0.0278	0	Benign	not_provided	RABIF	synonymous_variant	YES	3.761
19:27908363:T:C	rs74402274	1	203709408	T	C	ATP2B4	synonymous_variant	78	168	0.464286	0.3125	0.3	0.5833	0.64	Benign	not_provided	ATP2B4	synonymous_variant	YES	0.736
19:2844196:C:T	rs764535	1	223112787	G	A	TLR5	missense_variant	3	168	0.0178571	0	0	0	0.06	Benign	not_provided	TLR5	missense_variant	YES	13
19:29513326:C:T	rs147074435	1	205057955	C	T	CNTN2	synonymous_variant	2	168	0.0119048	0	0.02	0	0.02	Benign	Epilepsy,_familial_adult_myoclonic,_5	CNTN2	non-coding_transcript_variant,synonymous_variant	YES	8.732
19:29790458:G:T	.	1	205163896	G	T	DSTYK	synonymous_variant	1	168	0.00595238	0.0313	0	0	0	Benign	not_provided	DSTYK	synonymous_variant	YES	9.78
19:32256864:G:A	.	1	207751847	G	A	CD46	upstream_gene_variant	8	168	0.047619	0.125	0.06	0	0.02	Benign	not_provided	CD46		NO	6.339
1:94114146:G:A	rs2095876	9	69248071	G	A	TJP2	synonymous_variant	56	168	0.333333	0.7813	0.24	0.1389	0.28	Benign	Cholestasis,_progressive_familial_intrahepatic,_4|Hypercholanemia,_familial_1|not_specified|not_provided	TJP2	synonymous_variant,intron_variant	YES	9.899
19:45218513:T:C	.	1	237496269	G	A	RYR2	intron_variant	43	168	0.255952	1	0.68	0.75	0.64	Benign	not_provided	RYR2	intron_variant	YES	0.064
19:45798259:C:T	rs1050993	1	236899005	A	G	MTR	3_prime_UTR_variant	164	168	0.97619	0.0625	0	0.0556	0	Benign	Disorders_of_Intracellular_Cobalamin_Metabolism	MTR	3_prime_UTR_variant	YES	1.961
19:45798259:C:T	rs1050993	1	236899005	A	G	MTR	downstream_gene_variant	164	168	0.97619	0.0625	0	0.0556	0	Benign	Disorders_of_Intracellular_Cobalamin_Metabolism	MTR	3_prime_UTR_variant	NO	1.961
19:45872595:C:A	.	1	236824490	G	T	MTR	intron_variant	2	168	0.0119048	0.0313	0	0.0278	0	Benign	not_provided	MTR	intron_variant	YES	0.05
19:45872595:C:A	.	1	236824490	G	T	MTR	intron_variant&non_coding_transcript_variant	2	168	0.0119048	0.0313	0	0.0278	0	Benign	not_provided	MTR	intron_variant	NO	0.05
19:45963519:G:A	rs1341863	1	236720121	C	T	ACTN2	synonymous_variant	71	168	0.422619	0.6563	0.52	0.3056	0.26	Benign	Dilated_cardiomyopathy_1AA|Primary_familial_hypertrophic_cardiomyopathy|Myopathy,_congenital,_with_structured_cores_and_z-line_abnormalities|not_specified|Cardiovascular_phenotype	ACTN2	synonymous_variant,no_sequence_alteration,5_prime_UTR_variant	YES	3.67
19:46179263:G:A	rs559506851	1	236484371	C	T	EDARADD	3_prime_UTR_variant	6	168	0.0357143	0.1563	0.02	0	0	Benign	Hypohidrotic_ectodermal_dysplasia	EDARADD	3_prime_UTR_variant	YES	3.774
19:46179263:G:A	rs559506851	1	236484371	C	T	EDARADD	downstream_gene_variant	6	168	0.0357143	0.1563	0.02	0	0	Benign	Hypohidrotic_ectodermal_dysplasia	EDARADD	3_prime_UTR_variant	NO	3.774
19:46179263:G:A	rs559506851	1	236484371	C	T	LOC100410785	non_coding_transcript_exon_variant	6	168	0.0357143	0.1563	0.02	0	0	Benign	Hypohidrotic_ectodermal_dysplasia	EDARADD	3_prime_UTR_variant	NO	3.774
19:46179263:G:A	rs559506851	1	236484371	C	T	LOC118149449	intron_variant&non_coding_transcript_variant	6	168	0.0357143	0.1563	0.02	0	0	Benign	Hypohidrotic_ectodermal_dysplasia	EDARADD	3_prime_UTR_variant	NO	3.774
19:46545472:G:A	rs16833183	1	236042140	C	T	NID1	missense_variant	105	168	0.625	0.375	0.74	0.6111	0.68	Benign	not_provided	NID1	missense_variant	YES	0.003
19:46545500:G:A	rs144654436	1	236042112	C	T	NID1	synonymous_variant	126	168	0.75	0.4375	0.86	0.9167	0.72	Benign	not_provided	NID1	synonymous_variant	YES	0.037
19:46607702:C:T	rs6662744	1	235977934	G	A	NID1	missense_variant	6	168	0.0357143	0.0313	0.04	0.0556	0.02	Benign	not_provided	NID1	missense_variant	YES	25.3
19:46827235:C:T	rs34160788	1	235746451	A	G	LYST	synonymous_variant	167	168	0.994048	0.0313	0	0	0	Benign	Chdiak-Higashi_syndrome|Autoinflammatory_syndrome|not_specified|not_provided	LYST	synonymous_variant	YES	1.327
1:94751171:A:G	rs56227711	9	91757459	G	A	ROR2	5_prime_UTR_variant	106	168	0.630952	0.375	0.44	0.3333	0.32	Benign	Brachydactyly_type_B1|Autosomal_recessive_Robinow_syndrome|not_provided	ROR2	synonymous_variant	NO	1.364
1:94751171:A:G	rs56227711	9	91757459	G	A	ROR2	non_coding_transcript_exon_variant	106	168	0.630952	0.375	0.44	0.3333	0.32	Benign	Brachydactyly_type_B1|Autosomal_recessive_Robinow_syndrome|not_provided	ROR2	synonymous_variant	NO	1.364
1:94751171:A:G	rs56227711	9	91757459	G	A	ROR2	synonymous_variant	106	168	0.630952	0.375	0.44	0.3333	0.32	Benign	Brachydactyly_type_B1|Autosomal_recessive_Robinow_syndrome|not_provided	ROR2	synonymous_variant	YES	1.364
19:7882308:G:A	rs528922293	1	218442751	C	T	TGFB2	3_prime_UTR_variant	2	168	0.0119048	0	0.02	0	0.02	Benign	Loeys-Dietz_syndrome_4	TGFB2	non-coding_transcript_variant,3_prime_UTR_variant	YES	0.004
2:1007608:C:T	rs199851385	7	56021096	G	A	PSPH	synonymous_variant	89	168	0.529762	0.5938	0.68	0.6389	0.26	Benign	Deficiency_of_phosphoserine_phosphatase	PSPH	synonymous_variant	YES	0.462
2:1009454:C:T	rs74874687	7	56019716	G	A	PSPH	synonymous_variant	94	168	0.559524	0.6563	0.56	0.6389	0.44	Benign	Deficiency_of_phosphoserine_phosphatase|not_provided	PSPH	synonymous_variant	YES	1.362
2:105529211:G:A	.	5	103190972	C	T	PPIP5K2	downstream_gene_variant	1	168	0.00595238	0	0	0	0.02	Benign	not_provided	PPIP5K2	synonymous_variant	NO	0.332
2:105529211:G:A	.	5	103190972	C	T	PPIP5K2	synonymous_variant	1	168	0.00595238	0	0	0	0.02	Benign	not_provided	PPIP5K2	synonymous_variant	YES	0.332
2:10928540:C:T	rs11546151	7	101206863	G	A	PLOD3	downstream_gene_variant	5	168	0.0297619	0	0.06	0	0.04	Benign	Bone_fragility_with_contractures,_arterial_rupture,_and_deafness|not_provided	PLOD3	synonymous_variant	NO	0.2
2:10928540:C:T	rs11546151	7	101206863	G	A	PLOD3	synonymous_variant	5	168	0.0297619	0	0.06	0	0.04	Benign	Bone_fragility_with_contractures,_arterial_rupture,_and_deafness|not_provided	PLOD3	synonymous_variant	YES	0.2
2:11287167:C:T	.	7	100814017	G	A	EPHB4	non_coding_transcript_exon_variant	2	168	0.0119048	0	0	0.0556	0	Benign	Cardiovascular_phenotype|not_provided	EPHB4	synonymous_variant	NO	1.418
2:11287167:C:T	.	7	100814017	G	A	EPHB4	synonymous_variant	2	168	0.0119048	0	0	0.0556	0	Benign	Cardiovascular_phenotype|not_provided	EPHB4	synonymous_variant	YES	1.418
2:115430088:G:A	.	5	93593563	C	T	NR2F1	splice_region_variant&synonymous_variant	2	168	0.0119048	0	0	0	0.04	Benign	not_provided	NR2F1	synonymous_variant	NO	4.253
2:118300308:G:A	rs3763073	5	90823476	C	T	ADGRV1	synonymous_variant	52	168	0.309524	0.3125	0.4	0.25	0.26	Benign	Usher_syndrome_type_2C|not_specified|not_provided	ADGRV1	non-coding_transcript_variant,synonymous_variant	YES	0.044
2:118388185:T:C	rs16869043	5	90725475	A	G	ADGRV1	intron_variant	2	168	0.0119048	0.0313	0.02	0	0	Benign	not_provided	ADGRV1	intron_variant	YES	4.601
2:121852327:A:T	.	5	87374461	T	A	CCNH	downstream_gene_variant	72	168	0.428571	0.875	0.42	0.2778	0.26	Benign	not_provided	RASA1	intron_variant	NO	0.117
2:121852327:A:T	.	5	87374461	T	A	CCNH	intron_variant&non_coding_transcript_variant	72	168	0.428571	0.875	0.42	0.2778	0.26	Benign	not_provided	RASA1	intron_variant	NO	0.117
2:121852327:A:T	.	5	87374461	T	A	CCNH	non_coding_transcript_exon_variant	72	168	0.428571	0.875	0.42	0.2778	0.26	Benign	not_provided	RASA1	intron_variant	NO	0.117
2:121852327:A:T	.	5	87374461	T	A	RASA1	intron_variant	72	168	0.428571	0.875	0.42	0.2778	0.26	Benign	not_provided	RASA1	intron_variant	YES	0.117
2:128666148:C:T	rs1805355	5	80670210	G	A	MSH3	5_prime_UTR_variant	52	168	0.309524	0.625	0.24	0.3333	0.16	Benign	Hereditary_cancer-predisposing_syndrome|not_provided	MSH3	synonymous_variant	NO	3.189
2:128666148:C:T	rs1805355	5	80670210	G	A	MSH3	synonymous_variant	52	168	0.309524	0.625	0.24	0.3333	0.16	Benign	Hereditary_cancer-predisposing_syndrome|not_provided	MSH3	synonymous_variant	YES	3.189
2:129256377:T:C	rs2229396	5	80076898	G	A	LOC108590630	downstream_gene_variant	163	168	0.970238	0.0313	0.04	0.0556	0	Benign	not_provided	THBS4	missense_variant	NO	16.21
2:129256377:T:C	rs2229396	5	80076898	G	A	THBS4	missense_variant	163	168	0.970238	0.0313	0.04	0.0556	0	Benign	not_provided	THBS4	missense_variant	YES	16.21
2:12994044:C:T	.	7	98977087	G	A	TRRAP	intron_variant	18	168	0.107143	0.2188	0.02	0.1944	0.06	Benign	not_provided	TRRAP	intron_variant	YES	2.308
2:12994044:C:T	.	7	98977087	G	A	TRRAP	intron_variant&non_coding_transcript_variant	18	168	0.107143	0.2188	0.02	0.1944	0.06	Benign	not_provided	TRRAP	intron_variant	NO	2.308
21:31980264:C:T	rs78795703	21	26930035	C	T	ADAMTS5	synonymous_variant	3	168	0.0178571	0	0.06	0	0	Benign	not_provided	ADAMTS5	synonymous_variant	YES	0.034
2:132087474:G:A	rs575049091	5	77344913	C	T	PDE8B	synonymous_variant	8	168	0.047619	0	0.04	0.0278	0.1	Benign	Autosomal_dominant_striatal_neurodegeneration_type_1|not_provided	PDE8B	synonymous_variant	YES	2.687
2:133709488:T:C	.	5	75712864	G	A	LOC118151839	upstream_gene_variant	160	168	0.952381	0.125	0.06	0	0.02	Benign	not_provided	POC5	missense_variant	NO	23.3
2:133709488:T:C	.	5	75712864	G	A	POC5	5_prime_UTR_variant	160	168	0.952381	0.125	0.06	0	0.02	Benign	not_provided	POC5	missense_variant	NO	23.3
2:133709488:T:C	.	5	75712864	G	A	POC5	missense_variant	160	168	0.952381	0.125	0.06	0	0.02	Benign	not_provided	POC5	missense_variant	YES	23.3
2:133709488:T:C	.	5	75712864	G	A	POC5	upstream_gene_variant	160	168	0.952381	0.125	0.06	0	0.02	Benign	not_provided	POC5	missense_variant	NO	23.3
2:135520424:G:A	rs146562116	5	73894487	C	T	ARHGEF28	synonymous_variant	31	168	0.184524	0.0625	0.22	0.25	0.18	Benign	not_specified|not_provided	ARHGEF28	synonymous_variant	YES	2.683
21:38517000:C:T	rs148012048	21	33553353	T	C	SON	non_coding_transcript_exon_variant	160	168	0.952381	0.0313	0.08	0.0556	0.02	Benign	not_specified|not_provided	SON	non-coding_transcript_variant,synonymous_variant,intron_variant	NO	1.982
21:38517000:C:T	rs148012048	21	33553353	T	C	SON	synonymous_variant	160	168	0.952381	0.0313	0.08	0.0556	0.02	Benign	not_specified|not_provided	SON	non-coding_transcript_variant,synonymous_variant,intron_variant	YES	1.982
21:39398079:G:A	rs2236609	21	34449813	A	G	KCNE1	intron_variant	164	168	0.97619	0	0	0.1111	0	Benign	not_provided	KCNE1	intron_variant	YES	0.065
21:41089682:G:A	rs200786415	21	36137905	G	A	CBR3	missense_variant	32	168	0.190476	0.125	0.14	0.3889	0.14	Benign	not_provided	CBR3	missense_variant	YES	17.34
2:14132653:C:T	rs571992660	7	6038600	C	T	ANKRD61	downstream_gene_variant	16	168	0.0952381	0.0938	0.06	0.0278	0.18	Benign	not_provided	EIF2AK1	synonymous_variant	NO	2.183
2:14132653:C:T	rs571992660	7	6038600	C	T	EIF2AK1	synonymous_variant	16	168	0.0952381	0.0938	0.06	0.0278	0.18	Benign	not_provided	EIF2AK1	synonymous_variant	YES	2.183
2:141802638:G:A	rs34528338	5	66054174	C	T	ERBIN	synonymous_variant	3	168	0.0178571	0.0625	0.02	0	0	Benign	not_provided	ERBIN	synonymous_variant	YES	1.707
21:41862574:T:C	rs118091633	21	36990236	T	C	HLCS	5_prime_UTR_variant	9	168	0.0535714	0.1563	0	0.0556	0.04	Benign	Holocarboxylase_synthetase_deficiency|not_provided	HLCS		NO	8.726
21:421975:G:A	.	3	97788447	C	T	ARL6	intron_variant	3	168	0.0178571	0.0313	0.04	0	0	Benign	not_provided	ARL6	intron_variant	YES	0.642
2:145769694:G:A	rs4290970	5	62306834	T	C	KIF2A	intron_variant	165	168	0.982143	0.0625	0.02	0	0	Benign	not_provided	KIF2A	intron_variant	YES	4.877
2:145769694:G:A	rs4290970	5	62306834	T	C	KIF2A	upstream_gene_variant	165	168	0.982143	0.0625	0.02	0	0	Benign	not_provided	KIF2A	intron_variant	NO	4.877
2:145769694:G:A	rs4290970	5	62306834	T	C	LOC118151533	upstream_gene_variant	165	168	0.982143	0.0625	0.02	0	0	Benign	not_provided	KIF2A	intron_variant	NO	4.877
21:46413311:G:A	rs2838113	21	41741645	G	A	RIPK4	synonymous_variant	5	168	0.0297619	0.125	0.02	0	0	Benign	Bartsocas-Papas_syndrome|not_specified|not_provided	RIPK4	synonymous_variant	YES	6.289
21:47161568:G:A	.	21	42473074	G	A	RSPH1	intron_variant	52	168	0.309524	0.4063	0.16	0.5	0.26	Benign	not_provided	RSPH1	intron_variant	YES	0.074
21:47252308:G:A	rs111412766	21	42564701	G	A	SLC37A1	splice_region_variant&intron_variant	81	168	0.482143	0.5625	0.5	0.5	0.4	Benign	not_provided	SLC37A1	intron_variant	NO	0.009
21:47672185:C:T	.	21	43063662	C	T	CBS	intron_variant	3	168	0.0178571	0	0.06	0	0	Benign	not_provided	CBS	intron_variant	YES	5.726
21:47672185:C:T	.	21	43063662	C	T	CBS	intron_variant&non_coding_transcript_variant	3	168	0.0178571	0	0.06	0	0	Benign	not_provided	CBS	intron_variant	NO	5.726
21:47983935:G:A	rs34164089	21	43419195	G	A	SIK1	missense_variant	2	168	0.0119048	0	0	0	0.04	Benign	Developmental_and_epileptic_encephalopathy,_30|Inborn_genetic_diseases|not_provided	SIK1	missense_variant	YES	22.6
21:47984970:C:T	rs148266853	21	43420240	C	T	SIK1	synonymous_variant	4	168	0.0238095	0	0	0	0.08	Benign	Developmental_and_epileptic_encephalopathy,_30|Inborn_genetic_diseases	SIK1	synonymous_variant	YES	3.758
21:48820349:C:T	rs149130190	21	44289721	C	T	AIRE	non_coding_transcript_exon_variant	3	168	0.0178571	0	0.02	0.0556	0	Benign	Polyglandular_autoimmune_syndrome,_type_1	AIRE	synonymous_variant	NO	0.608
21:48820349:C:T	rs149130190	21	44289721	C	T	AIRE	synonymous_variant	3	168	0.0178571	0	0.02	0.0556	0	Benign	Polyglandular_autoimmune_syndrome,_type_1	AIRE	synonymous_variant	YES	0.608
21:48944705:G:A	.	21	44406092	G	A	TRPM2	intron_variant	48	168	0.285714	0.1875	0.46	0.3056	0.16	Benign	not_provided	TRPM2	intron_variant	YES	0.138
21:48944705:G:A	.	21	44406092	G	A	TRPM2	intron_variant&non_coding_transcript_variant	48	168	0.285714	0.1875	0.46	0.3056	0.16	Benign	not_provided	TRPM2	intron_variant	NO	0.138
21:48964528:G:A	.	21	44435042	G	A	TRPM2	intron_variant	21	168	0.125	0.25	0.04	0.1667	0.1	Benign	not_provided	TRPM2	intron_variant	YES	1.011
21:48964528:G:A	.	21	44435042	G	A	TRPM2	intron_variant&non_coding_transcript_variant	21	168	0.125	0.25	0.04	0.1667	0.1	Benign	not_provided	TRPM2	intron_variant	NO	1.011
2:149009307:T:C	.	5	59180406	G	A	PDE4D	intron_variant	153	168	0.910714	0.1563	0.04	0	0.16	Benign	not_provided	PDE4D	intron_variant	YES	1.973
2:149226525:A:T	.	5	58975886	T	A	PDE4D	intron_variant	20	168	0.119048	0.2188	0.08	0.1111	0.1	Benign	not_provided	PDE4D	intron_variant	YES	1.946
21:49958331:G:A	.	21	45468696	G	A	COL18A1	synonymous_variant	5	168	0.0297619	0.1563	0	0	0	Benign	not_provided	COL18A1	synonymous_variant	YES	0.138
21:49985429:G:A	rs116111018	21	45492550	G	A	COL18A1	missense_variant	28	168	0.166667	0.4063	0.14	0	0.16	Benign	Knobloch_syndrome|not_provided	COL18A1	missense_variant	YES	7.099
21:50442356:G:A	.	21	45994257	G	A	COL6A1	intron_variant	13	168	0.077381	0.1875	0.04	0.1389	0	Benign	not_provided	COL6A1	intron_variant	YES	0.236
21:50603265:G:A	rs148787454	21	46154195	G	A	FTCD	5_prime_UTR_variant	27	168	0.160714	0.2813	0.18	0.1667	0.06	Benign	Glutamate_formiminotransferase_deficiency	FTCD	synonymous_variant	NO	0.776
21:50603265:G:A	rs148787454	21	46154195	G	A	FTCD	non_coding_transcript_exon_variant	27	168	0.160714	0.2813	0.18	0.1667	0.06	Benign	Glutamate_formiminotransferase_deficiency	FTCD	synonymous_variant	NO	0.776
21:50603265:G:A	rs148787454	21	46154195	G	A	FTCD	synonymous_variant	27	168	0.160714	0.2813	0.18	0.1667	0.06	Benign	Glutamate_formiminotransferase_deficiency	FTCD	synonymous_variant	YES	0.776
21:50603265:G:A	rs148787454	21	46154195	G	A	SPATC1L	downstream_gene_variant	27	168	0.160714	0.2813	0.18	0.1667	0.06	Benign	Glutamate_formiminotransferase_deficiency	FTCD	synonymous_variant	NO	0.776
21:50709095:A:G	.	21	46265403	G	A	MCM3AP	missense_variant	167	168	0.994048	0	0.02	0	0	Benign	not_provided	MCM3AP	missense_variant	YES	7.261
21:50841567:A:G	rs114474454	21	46401731	G	A	PCNT	intron_variant	167	168	0.994048	0	0	0	0.02	Benign	Microcephalic_osteodysplastic_primordial_dwarfism_type_II|not_specified|not_provided	PCNT	intron_variant	YES	0.237
21:50871607:T:C	.	21	46421778	C	T	LOC118149936	upstream_gene_variant	165	168	0.982143	0.0938	0	0	0	Benign	not_provided	PCNT	intron_variant	NO	1.78
21:50871607:T:C	.	21	46421778	C	T	PCNT	intron_variant	165	168	0.982143	0.0938	0	0	0	Benign	not_provided	PCNT	intron_variant	YES	1.78
2:151349440:G:A	.	5	56881542	T	C	MAP3K1	intron_variant	149	168	0.886905	0.0625	0.1	0.2778	0.04	Benign	not_provided	MAP3K1	intron_variant	YES	0.349
2:15366997:C:T	.	7	5529118	G	A	ACTB	intron_variant	1	168	0.00595238	0	0.02	0	0	Benign	not_provided	ACTB	intron_variant	YES	0.052
2:15518578:C:T	rs369944823	7	5374386	G	A	TNRC18	synonymous_variant	6	168	0.0357143	0	0	0.1111	0.04	Benign	not_provided	TNRC18	synonymous_variant	YES	0.056
2:15586979:G:A	rs150889269	7	5299105	C	T	SLC29A4	missense_variant	2	168	0.0119048	0	0	0.0556	0	Benign	not_provided	SLC29A4	missense_variant	YES	18.71
2:15586979:G:A	rs150889269	7	5299105	C	T	SLC29A4	non_coding_transcript_exon_variant	2	168	0.0119048	0	0	0.0556	0	Benign	not_provided	SLC29A4	missense_variant	NO	18.71
2:15657201:G:A	rs145722805	7	5228143	C	T	WIPI2	synonymous_variant	102	168	0.607143	0.7188	0.58	0.75	0.46	Benign	not_provided	WIPI2	synonymous_variant	YES	0.179
2:15987044:A:G	.	7	4784798	C	T	AP5Z1	intron_variant	163	168	0.970238	0.125	0.02	0	0	Benign	not_provided	AP5Z1	intron_variant	YES	0.065
2:1599906:C:G	rs192554187	7	66089711	C	G	ASL	intron_variant	1	168	0.00595238	0.0313	0	0	0	Benign	Argininosuccinate_lyase_deficiency|not_specified	ASL	intron_variant	YES	1.22
2:162792631:T:C	.	5	41158761	G	A	C6	synonymous_variant	162	168	0.964286	0.0313	0.06	0.0556	0	Benign	not_specified|not_provided	C6	synonymous_variant	YES	0.446
2:162980982:T:C	.	5	40964883	G	A	C7	intron_variant	164	168	0.97619	0.0625	0.04	0	0	Benign	not_provided	C7	intron_variant	YES	0.195
2:164575354:C:T	.	5	39331664	G	A	C9	intron_variant	1	168	0.00595238	0	0	0.0278	0	Benign	not_provided	C9	intron_variant	YES	0.764
2:168944396:G:A	rs61742512	5	35037030	C	T	AGXT2	missense_variant	4	168	0.0238095	0.0625	0.04	0	0	Benign	not_provided	AGXT2	missense_variant	YES	22.1
2:170896766:A:G	.	5	32780729	C	T	NPR3	non_coding_transcript_exon_variant	130	168	0.77381	0.1563	0.14	0.4444	0.2	Benign	not_provided	NPR3	synonymous_variant	NO	2.62
2:170896766:A:G	.	5	32780729	C	T	NPR3	synonymous_variant	130	168	0.77381	0.1563	0.14	0.4444	0.2	Benign	not_provided	NPR3	synonymous_variant	YES	2.62
2:170932688:C:T	.	5	32738652	G	A	NPR3	intron_variant	2	168	0.0119048	0	0	0	0.04	Benign	not_provided	NPR3	intron_variant	YES	1.164
2:170932688:C:T	.	5	32738652	G	A	NPR3	intron_variant&non_coding_transcript_variant	2	168	0.0119048	0	0	0	0.04	Benign	not_provided	NPR3	intron_variant	NO	1.164
2:18159551:G:A	.	7	2605918	A	G	IQCE	missense_variant	167	168	0.994048	0	0	0.0278	0	Benign	Polydactyly,_postaxial,_type_a7	IQCE	missense_variant	YES	5.63
2:1817240:T:C	rs117194263	7	66639016	C	T	KCTD7	synonymous_variant	15	168	0.0892857	1	0.86	0.9167	0.9	Benign	Progressive_myoclonic_epilepsy_type_3|Inborn_genetic_diseases|not_specified|not_provided	KCTD7	synonymous_variant	YES	0.633
2:181857145:C:T	rs138634556	5	21751899	G	A	CDH12	synonymous_variant	2	168	0.0119048	0	0.02	0.0278	0	Benign	not_provided	CDH12	synonymous_variant	YES	0.202
2:18352598:C:T	.	5	157223042	C	T	ITK	intron_variant	2	168	0.0119048	0	0	0.0556	0	Benign	not_provided	ITK	intron_variant	YES	1.604
2:189177790:G:A	.	5	14381065	C	T	TRIO	intron_variant	2	168	0.0119048	0.0625	0	0	0	Benign	not_provided	TRIO	intron_variant	YES	0.038
2:189872427:A:G	rs3734109	5	13735783	T	C	DNAH5	intron_variant	2	168	0.0119048	0.0625	0	0	0	Benign	Primary_ciliary_dyskinesia_3|not_specified|not_provided	DNAH5	intron_variant	YES	0.01
2:192822627:A:G	.	5	11098457	T	C	CTNND2	intron_variant	14	168	0.0833333	0.1563	0.1	0.0556	0.04	Benign	not_provided	CTNND2	intron_variant	YES	5.629
2:193691967:T:C	rs115129340	5	10282221	A	G	CMBL	synonymous_variant	8	168	0.047619	0.125	0.04	0.0556	0	Benign	not_provided	CMBL	synonymous_variant	YES	0.687
2:193715067:C:T	.	5	10262046	A	G	CCT5	intron_variant	163	168	0.970238	0	0.02	0	0.08	Benign	not_provided	CCT5	intron_variant	YES	0.526
2:196249501:T:C	rs113005255	5	7891433	G	A	MTRR	intron_variant	165	168	0.982143	0.0938	0	0	0	Benign	Methylcobalamin_deficiency_type_cblE|not_specified|not_provided	MTRR	intron_variant	YES	0.103
2:196249501:T:C	rs113005255	5	7891433	G	A	MTRR	intron_variant&non_coding_transcript_variant	165	168	0.982143	0.0938	0	0	0	Benign	Methylcobalamin_deficiency_type_cblE|not_specified|not_provided	MTRR	intron_variant	NO	0.103
2:202667466:C:A	.	5	1801858	G	T	MRPL36	intron_variant	8	168	0.047619	0.2188	0.02	0	0	Benign	not_provided	NDUFS6	intron_variant	NO	6.558
2:202667466:C:A	.	5	1801858	G	T	MRPL36	intron_variant&non_coding_transcript_variant	8	168	0.047619	0.2188	0.02	0	0	Benign	not_provided	NDUFS6	intron_variant	NO	6.558
2:202667466:C:A	.	5	1801858	G	T	MRPL36	upstream_gene_variant	8	168	0.047619	0.2188	0.02	0	0	Benign	not_provided	NDUFS6	intron_variant	NO	6.558
2:202667466:C:A	.	5	1801858	G	T	NDUFS6	intron_variant	8	168	0.047619	0.2188	0.02	0	0	Benign	not_provided	NDUFS6	intron_variant	YES	6.558
2:203012328:C:T	rs28363072	5	1414761	G	A	SLC6A3	synonymous_variant	7	168	0.0416667	0	0.06	0	0.08	Benign	Parkinsonism-dystonia,_infantile	SLC6A3	synonymous_variant	YES	9.884
2:203203146:T:C	rs113308807	5	1213991	G	A	SLC6A19	synonymous_variant	115	168	0.684524	0.2188	0.46	0.3611	0.2	Benign	not_provided	SLC6A19	synonymous_variant	YES	5.916
2:203204863:T:C	.	5	1212500	G	A	SLC6A19	intron_variant	164	168	0.97619	0.125	0	0	0	Benign	not_specified|not_provided	SLC6A19	intron_variant	YES	0.185
2:204027536:G:A	rs375973207	5	491980	C	T	SLC9A3	synonymous_variant	54	168	0.321429	0.625	0.4	0.1111	0.2	Benign	not_provided	SLC9A3	synonymous_variant	YES	1.636
2:204027695:C:T	rs137949901	5	491821	G	A	SLC9A3	synonymous_variant	1	168	0.00595238	0	0.02	0	0	Benign	not_provided	SLC9A3	synonymous_variant	YES	0.438
22:10065885:G:A	.	19	11175740	G	A	KANK2	intron_variant	1	168	0.00595238	0	0	0	0.02	Benign	not_provided	KANK2	intron_variant	YES	2.324
22:10448623:T:C	.	19	11577645	T	C	ACP5	5_prime_UTR_variant	113	168	0.672619	0.4063	0.86	0.6111	0.7	Benign	not_provided	ACP5	5_prime_UTR_variant	YES	13.61
22:10448623:T:C	.	19	11577645	T	C	ACP5	missense_variant	113	168	0.672619	0.4063	0.86	0.6111	0.7	Benign	not_provided	ACP5	5_prime_UTR_variant	NO	13.61
22:1051761:A:G	rs376709081	19	1399956	G	A	GAMT	intron_variant	148	152	0.973684	0	0.0625	0.0357	0	Benign	Cerebral_creatine_deficiency_syndrome|not_specified	GAMT	intron_variant	YES	0.025
22:1051761:A:G	rs376709081	19	1399956	G	A	NDUFS7	downstream_gene_variant	148	152	0.973684	0	0.0625	0.0357	0	Benign	Cerebral_creatine_deficiency_syndrome|not_specified	GAMT	intron_variant	NO	0.025
22:11214626:A:G	rs61737536	19	12663719	G	A	MAN2B1	synonymous_variant	138	168	0.821429	0.5	0.16	0.0833	0.06	Benign	Deficiency_of_alpha-mannosidase|not_specified|not_provided	MAN2B1	synonymous_variant	YES	0.043
22:11754448:T:C	rs892017	19	13214048	C	T	CACNA1A	intron_variant	126	168	0.75	0.2188	0.2	0.2778	0.3	Benign	not_provided	CACNA1A	intron_variant	YES	0.537
22:11761796:G:A	rs3816027	19	13224618	G	A	CACNA1A	intron_variant	32	168	0.190476	0.3438	0.12	0.25	0.12	Benign	Episodic_ataxia_type_2|Spinocerebellar_ataxia_type_6|Developmental_and_epileptic_encephalopathy,_42|Migraine,_familial_hemiplegic,_1|not_provided	CACNA1A	intron_variant	YES	1.504
22:11790063:C:T	.	19	13253339	C	T	CACNA1A	intron_variant	127	168	0.755952	0.9063	0.8	0.7222	0.64	Benign	not_provided	CACNA1A	intron_variant	YES	0.44
22:12557472:C:T	rs113485753	19	14042460	C	T	IL27RA	missense_variant	39	168	0.232143	0.3438	0.24	0.3056	0.1	Benign	not_provided	IL27RA	missense_variant	YES	14.55
22:12618736:G:A	rs56105247	19	14107354	G	A	LOC118150160	upstream_gene_variant	1	168	0.00595238	0	0	0	0.02	Benign	not_provided	PRKACA	synonymous_variant	NO	8.591
22:12618736:G:A	rs56105247	19	14107354	G	A	PRKACA	synonymous_variant	1	168	0.00595238	0	0	0	0.02	Benign	not_provided	PRKACA	synonymous_variant	YES	8.591
22:13857689:A:C	.	19	15243204	T	G	BRD4	downstream_gene_variant	1	156	0.00641026	0	0	0.0333	0	Benign	not_provided	BRD4	synonymous_variant	NO	0.949
22:13857689:A:C	.	19	15243204	T	G	BRD4	non_coding_transcript_exon_variant	1	156	0.00641026	0	0	0.0333	0	Benign	not_provided	BRD4	synonymous_variant	NO	0.949
22:13857689:A:C	.	19	15243204	T	G	BRD4	synonymous_variant	1	156	0.00641026	0	0	0.0333	0	Benign	not_provided	BRD4	synonymous_variant	YES	0.949
22:14154059:G:A	rs28371536	19	15650073	G	A	LOC100411160	missense_variant	7	168	0.0416667	0	0	0.0833	0.08	Benign	not_provided	CYP4F3	missense_variant	NO	17.25
22:14154059:G:A	rs28371536	19	15650073	G	A	LOC100411160	non_coding_transcript_exon_variant	7	168	0.0416667	0	0	0.0833	0.08	Benign	not_provided	CYP4F3	missense_variant	NO	17.25
22:14833138:G:A	rs10403020	19	16482762	G	A	CALR3	synonymous_variant	2	168	0.0119048	0	0	0.0556	0	Benign	Hypertrophic_cardiomyopathy_19|not_specified|Cardiovascular_phenotype|not_provided	CALR3	synonymous_variant	YES	4.325
22:15335696:A:G	.	19	17002337	A	G	CPAMD8	non_coding_transcript_exon_variant	106	168	0.630952	0.4375	0.7	0.5556	0.74	Benign	not_provided	CPAMD8	non-coding_transcript_variant,synonymous_variant	NO	6.666
22:15335696:A:G	.	19	17002337	A	G	CPAMD8	synonymous_variant	106	168	0.630952	0.4375	0.7	0.5556	0.74	Benign	not_provided	CPAMD8	non-coding_transcript_variant,synonymous_variant	YES	6.666
22:1543262:T:C	rs373784387	19	1912569	C	T	ADAT3	synonymous_variant	111	168	0.660714	0.3125	0.36	0.3611	0.32	Benign	not_specified|not_provided	SCAMP4	synonymous_variant,intron_variant	NO	0.446
22:1543262:T:C	rs373784387	19	1912569	C	T	SCAMP4	intron_variant	111	168	0.660714	0.3125	0.36	0.3611	0.32	Benign	not_specified|not_provided	SCAMP4	synonymous_variant,intron_variant	YES	0.446
22:15675897:G:A	rs77401427	19	17341126	G	A	GTPBP3	missense_variant	17	168	0.10119	0.3438	0.04	0.0833	0.02	Benign	not_provided	GTPBP3	missense_variant	YES	6.982
22:15963679:G:A	rs201975105	19	17486848	G	A	SLC27A1	synonymous_variant	11	168	0.0654762	0	0.12	0.1111	0.02	Benign	not_provided	SLC27A1	synonymous_variant	YES	6.979
22:15972396:C:T	rs150502627	19	17500854	C	T	SLC27A1	synonymous_variant	21	168	0.125	0.4688	0.08	0.0556	0	Benign	not_provided	SLC27A1	synonymous_variant	YES	2.508
22:16430734:T:C	rs376464690	19	17973978	C	T	KCNN1	non_coding_transcript_exon_variant	121	168	0.720238	0.5313	0.22	0.3056	0.16	Benign	not_provided	KCNN1	non-coding_transcript_variant,synonymous_variant	NO	0.142
22:16430734:T:C	rs376464690	19	17973978	C	T	KCNN1	synonymous_variant	121	168	0.720238	0.5313	0.22	0.3056	0.16	Benign	not_provided	KCNN1	non-coding_transcript_variant,synonymous_variant	YES	0.142
22:1719639:C:T	.	19	2111650	T	C	AP3D1	intron_variant	161	168	0.958333	0.0625	0.1	0	0	Benign	not_provided	AP3D1	intron_variant	YES	0.076
22:2025561:C:T	rs200879771	19	2433901	C	T	LMNB2	synonymous_variant	3	168	0.0178571	0	0.02	0	0.04	Benign	Progressive_myoclonic_epilepsy_type_9|Lipodystrophy,_partial,_acquired,_susceptibility_to|not_provided	LMNB2	synonymous_variant	YES	6.579
22:26831111:C:T	rs116378078	19	29701046	C	T	C22H19orf12	3_prime_UTR_variant	9	168	0.0535714	0.125	0.02	0	0.08	Benign	Neurodegeneration_with_brain_iron_accumulation_4	C19orf12	3_prime_UTR_variant	NO	0.568
22:26831111:C:T	rs116378078	19	29701046	C	T	C22H19orf12	intron_variant	9	168	0.0535714	0.125	0.02	0	0.08	Benign	Neurodegeneration_with_brain_iron_accumulation_4	C19orf12	3_prime_UTR_variant	NO	0.568
22:294764:C:T	rs202076978	19	605147	C	T	HCN2	synonymous_variant	8	168	0.047619	0.0938	0.08	0	0.02	Benign	not_provided	HCN2	synonymous_variant	YES	2.326
22:3134219:C:T	.	19	3641674	C	T	PIP5K1C	intron_variant	3	168	0.0178571	0	0.04	0.0278	0	Benign	Lethal_congenital_contracture_syndrome_3|not_provided	PIP5K1C	intron_variant	YES	0.211
22:314354:G:A	rs149476145	19	619099	G	A	HCN2	downstream_gene_variant	12	168	0.0714286	0.1875	0.06	0.0278	0.04	Benign	not_provided	POLRMT	synonymous_variant	NO	0.105
22:314354:G:A	rs149476145	19	619099	G	A	POLRMT	synonymous_variant	12	168	0.0714286	0.1875	0.06	0.0278	0.04	Benign	not_provided	POLRMT	synonymous_variant	YES	0.105
22:31963728:A:G	.	19	35841785	G	A	NPHS1	non_coding_transcript_exon_variant	167	168	0.994048	0	0.02	0	0	Benign	not_provided	NPHS1	synonymous_variant	NO	0.243
22:31963728:A:G	.	19	35841785	G	A	NPHS1	synonymous_variant	167	168	0.994048	0	0.02	0	0	Benign	not_provided	NPHS1	synonymous_variant	YES	0.243
2:23332765:T:C	.	5	162103729	C	T	GABRG2	intron_variant	141	168	0.839286	0.1875	0.12	0.1111	0.22	Benign	not_provided	GABRG2	intron_variant	YES	1.673
2:23388874:G:A	rs150875037	5	162155342	G	A	GABRG2	3_prime_UTR_variant	22	168	0.130952	0.1875	0.1	0	0.22	Benign	Epilepsy,_childhood_absence_2	GABRG2	3_prime_UTR_variant	YES	0.735
22:34016744:C:T	.	19	38482739	C	T	RYR1	intron_variant	23	168	0.136905	0.4063	0.08	0.0556	0.08	Benign	not_provided	RYR1	intron_variant	YES	0.224
22:34035533:T:C	rs2960324	19	38501249	C	T	RYR1	intron_variant	146	168	0.869048	0.4063	0.08	0.0556	0.06	Benign	not_provided	RYR1	intron_variant	YES	0.552
22:3409076:C:T	rs140608538	19	3925772	C	T	ATCAY	3_prime_UTR_variant	29	168	0.172619	0.0625	0.22	0.1111	0.24	Benign	Cayman_type_cerebellar_ataxia	ATCAY	3_prime_UTR_variant	YES	0.422
22:3409447:T:C	rs10404967	19	3926134	C	T	ATCAY	3_prime_UTR_variant	161	168	0.958333	0.0313	0	0.1389	0.02	Benign	Cayman_type_cerebellar_ataxia	ATCAY	3_prime_UTR_variant	YES	0.377
22:3459847:A:G	rs79533804	19	3980627	G	A	EEF2	synonymous_variant	157	168	0.934524	0.0938	0.06	0.0833	0.04	Benign	not_provided	EEF2	synonymous_variant	YES	0.135
22:3459847:A:G	rs79533804	19	3980627	G	A	LOC118150374	downstream_gene_variant	157	168	0.934524	0.0938	0.06	0.0833	0.04	Benign	not_provided	EEF2	synonymous_variant	NO	0.135
22:34915478:T:C	.	19	39489772	C	T	DLL3	upstream_gene_variant	31	168	0.184524	1	0.68	0.8611	0.8	Benign	not_provided	TIMM50	synonymous_variant	NO	11.23
22:34915478:T:C	.	19	39489772	C	T	TIMM50	synonymous_variant	31	168	0.184524	1	0.68	0.8611	0.8	Benign	not_provided	TIMM50	synonymous_variant	YES	11.23
22:3569470:T:A	.	19	4099190	T	A	MAP2K2	intron_variant	3	168	0.0178571	0	0.02	0	0.04	Benign	RASopathy	MAP2K2	intron_variant	YES	0.063
22:36424413:C:T	.	19	41231315	T	C	AXL	intron_variant	167	168	0.994048	0.0313	0	0	0	Benign	not_provided	AXL	intron_variant	YES	3.385
22:36689690:A:G	rs113558709	19	41721019	G	A	LOC100409241	synonymous_variant	159	168	0.946429	0.125	0	0.0556	0.06	Benign	not_provided	CEACAM5	synonymous_variant	NO	1.06
22:36900050:G:A	rs35272495	19	41969513	G	A	ATP1A3	synonymous_variant	89	168	0.529762	0.6563	0.56	0.5833	0.38	Benign	Dystonia_12|Cerebellar_ataxia-areflexia-pes_cavus-optic_atrophy-sensorineural_hearing_loss_syndrome|Alternating_hemiplegia_of_childhood_2|Developmental_and_epileptic_encephalopathy_99|not_provided	ATP1A3	synonymous_variant	YES	0.463
22:37310696:C:T	.	19	42370130	C	T	MEGF8	intron_variant	2	168	0.0119048	0.0625	0	0	0	Benign	not_provided	MEGF8	intron_variant	YES	0.135
22:37349160:G:A	.	19	42410457	G	A	LIPE	synonymous_variant	28	168	0.166667	0	0.18	0.1389	0.28	Benign	not_provided	LIPE	synonymous_variant	YES	1.394
22:37349160:G:A	.	19	42410457	G	A	LOC103789957	intron_variant&non_coding_transcript_variant	28	168	0.166667	0	0.18	0.1389	0.28	Benign	not_provided	LIPE	synonymous_variant	NO	1.394
22:38578585:C:T	rs61733035	19	44327931	C	T	ZNF112	synonymous_variant	2	168	0.0119048	0	0.02	0	0.02	Benign	not_provided	ZNF112	synonymous_variant	YES	0.999
22:38578585:C:T	rs61733035	19	44327931	C	T	ZNF235	intron_variant	2	168	0.0119048	0	0.02	0	0.02	Benign	not_provided	ZNF112	synonymous_variant	NO	0.999
22:38578585:C:T	rs61733035	19	44327931	C	T	ZNF235	upstream_gene_variant	2	168	0.0119048	0	0.02	0	0.02	Benign	not_provided	ZNF112	synonymous_variant	NO	0.999
22:38839376:G:A	rs199779296	19	44705666	G	A	CEACAM16	synonymous_variant	39	168	0.232143	0.0313	0.32	0.1111	0.36	Benign	not_specified|not_provided	CEACAM16	synonymous_variant	YES	0.576
22:38935626:C:G	rs139275212	19	44813568	C	G	BCAM	synonymous_variant	2	168	0.0119048	0	0	0.0278	0.02	Benign	not_provided	BCAM	synonymous_variant	YES	5.614
22:39358802:C:T	rs148301412	19	45287553	C	T	MARK4	synonymous_variant	58	168	0.345238	0.3438	0.22	0.6667	0.24	Benign	not_provided	MARK4	synonymous_variant	YES	0.046
22:41192271:C:T	rs146840425	19	47353279	T	C	DHX34	synonymous_variant	163	168	0.970238	0.1563	0	0	0	Benign	not_provided	DHX34	synonymous_variant	YES	0.151
22:41509954:T:C	.	19	47679689	T	C	BICRA	5_prime_UTR_variant	15	168	0.0892857	0.1875	0.08	0.0833	0.04	Benign	not_provided	BICRA	synonymous_variant	NO	1.521
22:41509954:T:C	.	19	47679689	T	C	BICRA	synonymous_variant	15	168	0.0892857	0.1875	0.08	0.0833	0.04	Benign	not_provided	BICRA	synonymous_variant	YES	1.521
22:41531543:C:T	rs181534456	19	47702199	C	T	BICRA	synonymous_variant	2	168	0.0119048	0	0.04	0	0	Benign	not_provided	BICRA	synonymous_variant	YES	6.654
22:41531543:C:T	rs181534456	19	47702199	C	T	EHD2	upstream_gene_variant	2	168	0.0119048	0	0.04	0	0	Benign	not_provided	BICRA	synonymous_variant	NO	6.654
22:41852712:G:A	.	19	48137550	C	T	LIG1	missense_variant	35	168	0.208333	0.0938	0.26	0.1667	0.26	Benign	not_provided	LIG1	missense_variant,non-coding_transcript_variant	YES	17.12
22:42076220:G:A	rs35461177	19	48297657	G	A	CCDC114	missense_variant	3	168	0.0178571	0	0.04	0	0.02	Benign	Primary_ciliary_dyskinesia|not_specified|not_provided	ODAD1	missense_variant	NO	20.8
22:42358077:C:T	rs16982154	19	48592741	C	T	SULT2B1	synonymous_variant	1	168	0.00595238	0	0	0.0278	0	Benign	not_provided	SULT2B1	synonymous_variant	YES	9.877
22:42367678:C:T	.	19	48599342	C	T	FAM83E	downstream_gene_variant	38	168	0.22619	0.2188	0.2	0.1667	0.3	Benign	not_provided	SULT2B1	missense_variant	NO	19.84
22:42367678:C:T	.	19	48599342	C	T	SULT2B1	missense_variant	38	168	0.22619	0.2188	0.2	0.1667	0.3	Benign	not_provided	SULT2B1	missense_variant	YES	19.84
22:42695599:C:T	.	19	48965387	C	T	BAX	downstream_gene_variant	8	168	0.047619	0.125	0	0.0833	0.02	Benign	Hereditary_hyperferritinemia_with_congenital_cataracts|Neuroferritinopathy	FTL	5_prime_UTR_variant	NO	5.841
22:42695599:C:T	.	19	48965387	C	T	FTL	5_prime_UTR_variant	8	168	0.047619	0.125	0	0.0833	0.02	Benign	Hereditary_hyperferritinemia_with_congenital_cataracts|Neuroferritinopathy	FTL	5_prime_UTR_variant	YES	5.841
22:42695599:C:T	.	19	48965387	C	T	GYS1	downstream_gene_variant	8	168	0.047619	0.125	0	0.0833	0.02	Benign	Hereditary_hyperferritinemia_with_congenital_cataracts|Neuroferritinopathy	FTL	5_prime_UTR_variant	NO	5.841
22:42721703:C:A	rs111792937	19	48986057	C	A	GYS1	intron_variant	149	168	0.886905	0.7813	0.88	0.8889	0.96	Benign	not_provided	GYS1	intron_variant	YES	1.59
22:42891631:C:T	rs75346702	19	49190609	C	T	TRPM4	intron_variant	129	168	0.767857	0.7188	0.7	0.7778	0.86	Benign	not_provided	TRPM4	intron_variant	YES	2.835
22:42891631:C:T	rs75346702	19	49190609	C	T	TRPM4	intron_variant&non_coding_transcript_variant	129	168	0.767857	0.7188	0.7	0.7778	0.86	Benign	not_provided	TRPM4	intron_variant	NO	2.835
22:42895134:C:T	rs3745301	19	49196609	C	T	TRPM4	non_coding_transcript_exon_variant	5	168	0.0297619	0.1563	0	0	0	Benign	Progressive_familial_heart_block_type_IB|not_specified|Cardiovascular_phenotype	TRPM4	synonymous_variant,intron_variant	NO	8.72
22:42895134:C:T	rs3745301	19	49196609	C	T	TRPM4	synonymous_variant	5	168	0.0297619	0.1563	0	0	0	Benign	Progressive_familial_heart_block_type_IB|not_specified|Cardiovascular_phenotype	TRPM4	synonymous_variant,intron_variant	YES	8.72
22:42905249:A:G	rs1175810	19	49201992	G	A	TRPM4	non_coding_transcript_exon_variant	126	168	0.75	0.4375	0.16	0.1667	0.28	Benign	Progressive_familial_heart_block_type_IB|not_specified|Cardiovascular_phenotype	TRPM4	synonymous_variant	NO	0.027
22:42905249:A:G	rs1175810	19	49201992	G	A	TRPM4	synonymous_variant	126	168	0.75	0.4375	0.16	0.1667	0.28	Benign	Progressive_familial_heart_block_type_IB|not_specified|Cardiovascular_phenotype	TRPM4	synonymous_variant	YES	0.027
22:42905291:G:A	rs35145363	19	49202034	G	A	TRPM4	non_coding_transcript_exon_variant	4	168	0.0238095	0.125	0	0	0	Benign	Progressive_familial_heart_block_type_IB|not_specified|Cardiovascular_phenotype	TRPM4	synonymous_variant	NO	0.067
22:42905291:G:A	rs35145363	19	49202034	G	A	TRPM4	synonymous_variant	4	168	0.0238095	0.125	0	0	0	Benign	Progressive_familial_heart_block_type_IB|not_specified|Cardiovascular_phenotype	TRPM4	synonymous_variant	YES	0.067
22:42905940:A:G	.	19	49202383	G	A	TRPM4	intron_variant	124	168	0.738095	0.4688	0.18	0.1944	0.26	Benign	not_provided	TRPM4	intron_variant	YES	0.917
22:42905940:A:G	.	19	49202383	G	A	TRPM4	intron_variant&non_coding_transcript_variant	124	168	0.738095	0.4688	0.18	0.1944	0.26	Benign	not_provided	TRPM4	intron_variant	NO	0.917
22:43002171:A:G	rs377403465	19	49337946	G	A	CD37	missense_variant	165	168	0.982143	0	0	0.0833	0	Benign	not_provided	CD37	missense_variant	YES	0.026
22:43002171:A:G	rs377403465	19	49337946	G	A	CD37	non_coding_transcript_exon_variant	165	168	0.982143	0	0	0.0833	0	Benign	not_provided	CD37	missense_variant	NO	0.026
22:43002171:A:G	rs377403465	19	49337946	G	A	LOC118150299	intron_variant&non_coding_transcript_variant	165	168	0.982143	0	0	0.0833	0	Benign	not_provided	CD37	missense_variant	NO	0.026
22:43002171:A:G	rs377403465	19	49337946	G	A	TEAD2	downstream_gene_variant	165	168	0.982143	0	0	0.0833	0	Benign	not_provided	CD37	missense_variant	NO	0.026
22:43831505:A:G	rs3745502	19	50266787	G	A	MYH14	intron_variant	130	168	0.77381	0.1563	0.26	0.1944	0.26	Benign	not_provided	MYH14	intron_variant	YES	6.294
22:43848509:C:T	rs35453633	19	50286538	C	T	MYH14	synonymous_variant	62	168	0.369048	0.625	0.26	0.3889	0.3	Benign	Autosomal_dominant_nonsyndromic_hearing_loss_4A|not_specified|not_provided	MYH14	synonymous_variant	YES	2.079
22:43883777:G:A	rs146772778	19	50323963	G	A	KCNC3	synonymous_variant	1	168	0.00595238	0	0	0.0278	0	Benign	not_provided	KCNC3	synonymous_variant	YES	0.108
22:43972828:T:C	rs200960532	19	50419939	C	T	POLD1	downstream_gene_variant	165	168	0.982143	0.0625	0.02	0	0	Benign	not_provided	SPIB	intron_variant	NO	5.346
22:43972828:T:C	rs200960532	19	50419939	C	T	SPIB	splice_region_variant&intron_variant	165	168	0.982143	0.0625	0.02	0	0	Benign	not_provided	SPIB	intron_variant	NO	5.346
22:44849701:G:A	rs144640661	19	51347050	G	A	ETFB	synonymous_variant	5	168	0.0297619	0.0938	0.02	0.0278	0	Benign	Multiple_acyl-CoA_dehydrogenase_deficiency|not_specified|not_provided	ETFB	synonymous_variant	YES	6.949
22:44855372:C:T	.	19	51352957	C	T	ETFB	intron_variant	3	168	0.0178571	0	0.04	0	0.02	Benign	not_provided	ETFB	intron_variant	YES	5.464
22:45496401:A:G	.	19	52202046	G	A	PPP2R1A	intron_variant	161	166	0.96988	0.0625	0.0417	0	0.02	Benign	not_provided	PPP2R1A	intron_variant	YES	0.856
22:4604376:C:T	rs148314771	19	5144908	C	T	KDM4B	splice_region_variant&intron_variant	62	168	0.369048	0.0625	0.48	0.3056	0.5	Benign	not_provided	KDM4B	intron_variant	NO	0.493
22:47060163:T:C	rs79884502	19	53803961	C	T	NLRP12	missense_variant	148	168	0.880952	0.3438	0.06	0.0278	0.1	Benign	Familial_cold_autoinflammatory_syndrome_2|Autoinflammatory_syndrome	NLRP12	missense_variant	YES	0.013
22:47060297:T:C	rs140247843	19	53804095	C	T	NLRP12	synonymous_variant	167	168	0.994048	0.0313	0	0	0	Benign	Familial_cold_autoinflammatory_syndrome_2	NLRP12	synonymous_variant	YES	0.342
22:47341616:G:A	rs143717956	19	54122601	G	A	PRPF31	splice_region_variant&intron_variant	49	168	0.291667	0.5	0.24	0.3889	0.14	Benign	Retinitis_pigmentosa|not_provided	PRPF31	intron_variant	NO	2.029
22:51165320:A:G	rs149541658	19	58511456	G	A	LOC118150146	downstream_gene_variant	133	168	0.791667	0.4375	0.16	0.1111	0.18	Benign	not_provided	SLC27A5	missense_variant,intron_variant	NO	0.002
22:51165320:A:G	rs149541658	19	58511456	G	A	SLC27A5	missense_variant	133	168	0.791667	0.4375	0.16	0.1111	0.18	Benign	not_provided	SLC27A5	missense_variant,intron_variant	YES	0.002
22:51165320:A:G	rs149541658	19	58511456	G	A	SLC27A5	non_coding_transcript_exon_variant	133	168	0.791667	0.4375	0.16	0.1111	0.18	Benign	not_provided	SLC27A5	missense_variant,intron_variant	NO	0.002
22:51165320:A:G	rs149541658	19	58511456	G	A	ZBTB45	downstream_gene_variant	133	168	0.791667	0.4375	0.16	0.1111	0.18	Benign	not_provided	SLC27A5	missense_variant,intron_variant	NO	0.002
22:51165484:C:T	rs145284710	19	58511620	C	T	LOC118150146	downstream_gene_variant	1	168	0.00595238	0.0313	0	0	0	Benign	not_specified|not_provided	SLC27A5	synonymous_variant	NO	0.519
22:51165484:C:T	rs145284710	19	58511620	C	T	SLC27A5	non_coding_transcript_exon_variant	1	168	0.00595238	0.0313	0	0	0	Benign	not_specified|not_provided	SLC27A5	synonymous_variant	NO	0.519
22:51165484:C:T	rs145284710	19	58511620	C	T	SLC27A5	synonymous_variant	1	168	0.00595238	0.0313	0	0	0	Benign	not_specified|not_provided	SLC27A5	synonymous_variant	YES	0.519
22:51165484:C:T	rs145284710	19	58511620	C	T	ZBTB45	downstream_gene_variant	1	168	0.00595238	0.0313	0	0	0	Benign	not_specified|not_provided	SLC27A5	synonymous_variant	NO	0.519
22:5119204:G:A	rs145873959	19	5694517	G	A	LONP1	synonymous_variant	7	168	0.0416667	0.0938	0.04	0.0278	0.02	Benign	not_provided	LONP1	non-coding_transcript_variant,synonymous_variant	YES	0.157
22:5119204:G:A	rs145873959	19	5694517	G	A	RPL36	downstream_gene_variant	7	168	0.0416667	0.0938	0.04	0.0278	0.02	Benign	not_provided	LONP1	non-coding_transcript_variant,synonymous_variant	NO	0.157
22:5121332:G:A	rs11551018	19	5696676	G	A	LONP1	synonymous_variant	7	168	0.0416667	0	0.1	0	0.04	Benign	not_provided	LONP1	non-coding_transcript_variant,synonymous_variant	YES	0.203
22:5121332:G:A	rs11551018	19	5696676	G	A	RPL36	downstream_gene_variant	7	168	0.0416667	0	0.1	0	0.04	Benign	not_provided	LONP1	non-coding_transcript_variant,synonymous_variant	NO	0.203
22:5123630:G:A	rs61738271	19	5699194	G	A	LONP1	synonymous_variant	7	168	0.0416667	0	0.1	0	0.04	Benign	not_provided	LONP1	non-coding_transcript_variant,synonymous_variant	YES	0.349
22:524599:C:T	.	19	852234	C	T	ELANE	5_prime_UTR_variant	61	168	0.363095	0.5938	0.38	0.25	0.28	Benign	not_provided	ELANE	genic_upstream_transcript_variant	NO	8.331
22:6013633:G:A	.	19	6696688	G	A	C3	intron_variant	16	168	0.0952381	0.0938	0.06	0.0833	0.14	Benign	Age_related_macular_degeneration_9|Complement_component_3_deficiency|not_provided	C3	intron_variant	YES	2.818
22:6216503:G:A	rs141986863	19	6913820	G	A	ADGRE1	synonymous_variant	2	168	0.0119048	0.0313	0.02	0	0	Benign	not_provided	ADGRE1	synonymous_variant	YES	1.884
22:6848816:C:T	rs146463717	19	7542796	C	T	PNPLA6	non_coding_transcript_exon_variant	3	168	0.0178571	0.0313	0	0.0278	0.02	Benign	Hereditary_spastic_paraplegia_39	PNPLA6	synonymous_variant	NO	0.099
22:6848816:C:T	rs146463717	19	7542796	C	T	PNPLA6	synonymous_variant	3	168	0.0178571	0.0313	0	0.0278	0.02	Benign	Hereditary_spastic_paraplegia_39	PNPLA6	synonymous_variant	YES	0.099
22:6848906:C:T	rs151146154	19	7542886	C	T	PNPLA6	non_coding_transcript_exon_variant	139	168	0.827381	0.8438	0.8	0.8889	0.8	Benign	Hereditary_spastic_paraplegia_39	PNPLA6	synonymous_variant	NO	3.643
22:6848906:C:T	rs151146154	19	7542886	C	T	PNPLA6	synonymous_variant	139	168	0.827381	0.8438	0.8	0.8889	0.8	Benign	Hereditary_spastic_paraplegia_39	PNPLA6	synonymous_variant	YES	3.643
22:6860424:A:G	.	19	7556937	G	A	PNPLA6	intron_variant	99	168	0.589286	0.375	0.42	0.6111	0.28	Benign	not_provided	PNPLA6	intron_variant	YES	1.196
22:6860424:A:G	.	19	7556937	G	A	PNPLA6	intron_variant&non_coding_transcript_variant	99	168	0.589286	0.375	0.42	0.6111	0.28	Benign	not_provided	PNPLA6	intron_variant	NO	1.196
22:6912702:A:G	rs114173574	19	7611536	G	A	CAMSAP3	synonymous_variant	40	168	0.238095	1	0.6	0.7222	0.8	Benign	not_provided	CAMSAP3	synonymous_variant	YES	0.15
22:6933653:G:T	rs73921477	19	7629699	G	T	LOC100405707	upstream_gene_variant	69	168	0.410714	0.4375	0.38	0.4722	0.38	Benign	not_provided	PET100		NO	6.159
22:6933653:G:T	rs73921477	19	7629699	G	T	PCP2	downstream_gene_variant	69	168	0.410714	0.4375	0.38	0.4722	0.38	Benign	not_provided	PET100		NO	6.159
22:6933653:G:T	rs73921477	19	7629699	G	T	XAB2	upstream_gene_variant	69	168	0.410714	0.4375	0.38	0.4722	0.38	Benign	not_provided	PET100		NO	6.159
22:6945798:C:T	.	19	7639825	C	T	STXBP2	intron_variant	3	168	0.0178571	0	0.06	0	0	Benign	Familial_hemophagocytic_lymphohistiocytosis_5	STXBP2	intron_variant	YES	13.18
22:6952169:A:G	rs6791	19	7647391	A	G	STXBP2	missense_variant	40	168	0.238095	0	0.32	0.3333	0.24	Benign	Familial_hemophagocytic_lymphohistiocytosis_5|Familial_hemophagocytic_lymphohistiocytosis|not_specified|not_provided	STXBP2	missense_variant,non-coding_transcript_variant	YES	0.02
22:6976998:C:T	rs113286748	19	7678983	C	T	MCEMP1	stop_gained&splice_region_variant	49	168	0.291667	0	0.56	0.1111	0.34	Benign	not_provided	MCEMP1	stop_gained	NO	26.9
22:6976998:C:T	rs113286748	19	7678983	C	T	TRAPPC5	upstream_gene_variant	49	168	0.291667	0	0.56	0.1111	0.34	Benign	not_provided	MCEMP1	stop_gained	NO	26.9
22:7367679:A:G	.	19	8123777	A	G	FBN3	splice_region_variant&intron_variant	11	168	0.0654762	0.3438	0	0	0	Benign	not_provided	FBN3	intron_variant	NO	0.657
22:7381437:T:C	.	19	8136237	C	T	FBN3	missense_variant	15	168	0.0892857	0.9688	0.9	0.9167	0.88	Benign	not_provided	FBN3	missense_variant	YES	0.016
22:7760810:C:T	.	19	8522317	C	T	MYO1F	intron_variant	8	168	0.047619	0.0938	0.06	0	0.04	Benign	not_provided	MYO1F	intron_variant	YES	0.355
22:874976:C:T	.	19	1226672	C	T	LOC100391177	downstream_gene_variant	25	168	0.14881	0.3125	0.16	0.0833	0.08	Benign	not_provided	STK11	intron_variant	NO	0.475
22:874976:C:T	.	19	1226672	C	T	LOC118150166	downstream_gene_variant	25	168	0.14881	0.3125	0.16	0.0833	0.08	Benign	not_provided	STK11	intron_variant	NO	0.475
22:874976:C:T	.	19	1226672	C	T	STK11	splice_region_variant&intron_variant	25	168	0.14881	0.3125	0.16	0.0833	0.08	Benign	not_provided	STK11	intron_variant	NO	0.475
22:874976:C:T	.	19	1226672	C	T	STK11	splice_region_variant&intron_variant&non_coding_transcript_variant	25	168	0.14881	0.3125	0.16	0.0833	0.08	Benign	not_provided	STK11	intron_variant	NO	0.475
22:9292878:G:A	rs12720266	19	10365586	G	A	TYK2	synonymous_variant	36	168	0.214286	0.4063	0.16	0.0833	0.24	Benign	Immunodeficiency_35|not_specified	TYK2	synonymous_variant	YES	0.035
22:9923100:C:T	rs28997582	19	11035015	C	T	SMARCA4	synonymous_variant	9	168	0.0535714	0.0938	0.04	0.0278	0.06	Benign	Rhabdoid_tumor_predisposition_syndrome_2|Intellectual_disability,_autosomal_dominant_16|Hereditary_cancer-predisposing_syndrome|Coffin-Siris_syndrome|not_specified	SMARCA4	non-coding_transcript_variant,synonymous_variant	YES	0.132
22:9998095:G:A	.	19	11107685	G	A	LDLR	intron_variant	46	168	0.27381	0.125	0.26	0.3056	0.36	Benign	not_provided	LDLR	intron_variant	YES	0.946
2:31624374:A:G	.	5	134887831	G	A	TXNDC15	synonymous_variant	70	168	0.416667	0.875	0.42	0.6667	0.5	Benign	not_provided	TXNDC15	synonymous_variant	YES	0.191
2:32771256:C:T	rs34334509	5	136049483	C	T	TGFBI	synonymous_variant	41	168	0.244048	0.375	0.3	0.1389	0.18	Benign	Corneal_dystrophy	TGFBI	synonymous_variant	YES	0.32
2:45448852:C:T	.	5	148417113	C	T	FBXO38	synonymous_variant	120	168	0.714286	0.75	0.64	0.8333	0.68	Benign	Distal_hereditary_motor_neuropathy_type_2	FBXO38	synonymous_variant	YES	1.975
2:46004891:T:C	rs17722113	5	148995207	C	T	.	intergenic_variant	167	168	0.994048	0.0313	0	0	0	Benign	Charcot-Marie-Tooth_disease_type_4C|Susceptibility_to_mononeuropathy_of_the_median_nerve,_mild	SH3TC2	3_prime_UTR_variant	NO	0.795
2:47167093:G:A	.	5	150118588	G	A	PDGFRB	intron_variant	31	168	0.184524	0.25	0.26	0.1111	0.12	Benign	not_provided	PDGFRB	intron_variant	YES	5.741
2:48484897:G:A	.	5	151333514	G	A	SLC36A2	intron_variant	7	168	0.0416667	0	0	0.1944	0	Benign	not_provided	SLC36A2	intron_variant	YES	0.27
2:48792395:A:G	.	5	151507723	G	A	FAT2	intron_variant	165	168	0.982143	0	0	0	0.06	Benign	not_provided	FAT2	intron_variant	YES	0.51
2:48792395:A:G	.	5	151507723	G	A	LOC100413262	intron_variant	165	168	0.982143	0	0	0	0.06	Benign	not_provided	FAT2	intron_variant	NO	0.51
2:56869046:C:T	.	7	740958	G	A	DNAAF5	intron_variant	1	168	0.00595238	0.0313	0	0	0	Benign	Primary_ciliary_dyskinesia	DNAAF5	intron_variant	YES	0.028
2:56869046:C:T	.	7	740958	G	A	DNAAF5	intron_variant&non_coding_transcript_variant	1	168	0.00595238	0.0313	0	0	0	Benign	Primary_ciliary_dyskinesia	DNAAF5	intron_variant	NO	0.028
2:56869482:G:A	.	7	740483	C	T	DNAAF5	intron_variant	2	168	0.0119048	0	0.04	0	0	Benign	not_provided	DNAAF5	intron_variant	YES	1.755
2:56869482:G:A	.	7	740483	C	T	DNAAF5	intron_variant&non_coding_transcript_variant	2	168	0.0119048	0	0.04	0	0	Benign	not_provided	DNAAF5	intron_variant	NO	1.755
2:60628499:G:A	rs200461316	5	170055396	G	A	DOCK2	intron_variant	11	168	0.0654762	0.1563	0.02	0.0556	0.06	Benign	DOCK2_deficiency	DOCK2	intron_variant	YES	0.029
2:63059093:T:C	.	5	172381926	C	T	SH3PXD2B	intron_variant	33	168	0.196429	0.9688	0.82	0.8333	0.66	Benign	not_provided	SH3PXD2B	intron_variant	YES	0.841
2:71160373:G:A	.	5	179207787	T	C	ADAMTS2	intron_variant	99	168	0.589286	0.5	0.44	0.4722	0.28	Benign	not_provided	ADAMTS2	intron_variant	YES	1.148
2:71229965:C:T	rs560354978	5	179132886	G	A	ADAMTS2	synonymous_variant	6	168	0.0357143	0	0.04	0.0556	0.04	Benign	Ehlers-Danlos_syndrome,_dermatosparaxis_type	ADAMTS2	synonymous_variant	YES	0.179
2:71366274:T:C	.	5	178986622	G	A	GRM6	synonymous_variant	122	168	0.72619	0.4063	0.16	0.1944	0.36	Benign	not_provided	GRM6	synonymous_variant	YES	3.504
2:7313494:A:G	rs201874591	7	74824988	T	C	LOC100394080	synonymous_variant	141	168	0.839286	0.875	0.78	0.8333	0.88	Benign	not_provided	GTF2IRD2	non-coding_transcript_variant,synonymous_variant	NO	0.338
2:73519834:G:A	rs73273886	5	133225142	C	T	FSTL4	splice_region_variant&intron_variant	53	168	0.315476	0.0625	0.46	0.1944	0.42	Benign	not_provided	FSTL4	intron_variant	NO	2.907
2:80584427:G:A	rs561989552	5	126777195	C	T	LMNB1	5_prime_UTR_variant	2	168	0.0119048	0.0625	0	0	0	Benign	Adult-onset_autosomal_dominant_demyelinating_leukodystrophy	LMNB1	non-coding_transcript_variant,5_prime_UTR_variant	YES	12.21
2:84301294:G:A	rs75289011	5	123385043	C	T	CEP120	synonymous_variant	18	168	0.107143	0.2188	0.06	0.0556	0.12	Benign	Short-rib_thoracic_dysplasia_13_with_or_without_polydactyly|not_provided	CEP120	non-coding_transcript_variant,synonymous_variant	YES	8.516
2:8632716:G:A	rs144397980	7	73442304	T	C	BAZ1B	synonymous_variant	166	168	0.988095	0	0.02	0	0.02	Benign	not_provided	BAZ1B	synonymous_variant	YES	1.281
2:88450617:A:T	.	5	119507028	A	T	HSD17B4	intron_variant	73	168	0.434524	0.625	0.66	0.5	0.48	Benign	not_provided	HSD17B4	intron_variant	YES	0.051
2:915920:T:C	.	7	56102853	G	A	CHCHD2	intron_variant	54	168	0.321429	0.5938	0.82	0.6944	0.58	Benign	not_provided	CHCHD2	intron_variant	YES	4.486
3:110268379:C:T	rs116053658	4	86064323	G	A	MAPK10	synonymous_variant	2	168	0.0119048	0	0	0.0556	0	Benign	not_provided	MAPK10	synonymous_variant	YES	0.809
3:116751159:T:C	rs150281545	4	79905871	G	A	ANTXR2	3_prime_UTR_variant	150	168	0.892857	0.2188	0.08	0.1667	0.02	Benign	Hyaline_fibromatosis_syndrome	ANTXR2	3_prime_UTR_variant	YES	13.04
3:119949795:C:T	rs61741104	4	76754772	G	A	SHROOM3	missense_variant	18	168	0.107143	0.1563	0.16	0.0556	0.06	Benign	not_specified	SHROOM3	missense_variant	YES	6.584
3:141204229:A:T	.	4	54280760	T	A	PDGFRA	intron_variant	14	168	0.0833333	0.0938	0.1	0.0833	0.06	Benign	not_provided	PDGFRA	intron_variant	YES	0.224
3:141206632:G:A	.	4	54278344	C	T	PDGFRA	intron_variant	2	168	0.0119048	0.0625	0	0	0	Benign	Gastrointestinal_stromal_tumor	PDGFRA	intron_variant	YES	5.807
3:154652133:G:A	rs144039014	4	37902140	C	T	TBC1D1	synonymous_variant	60	168	0.357143	0.4688	0.28	0.3056	0.4	Benign	not_provided	TBC1D1	synonymous_variant	YES	0.227
3:167453408:T:C	rs144070806	4	25121091	A	G	SEPSECS	3_prime_UTR_variant	3	168	0.0178571	0	0	0.0833	0	Benign	Pontocerebellar_hypoplasia_type_2D	SEPSECS	3_prime_UTR_variant	YES	6.001
3:167453408:T:C	rs144070806	4	25121091	A	G	SEPSECS	downstream_gene_variant	3	168	0.0178571	0	0	0.0833	0	Benign	Pontocerebellar_hypoplasia_type_2D	SEPSECS	3_prime_UTR_variant	NO	6.001
3:175116258:C:T	.	4	17492208	A	G	QDPR	intron_variant	138	168	0.821429	0.25	0.18	0.1389	0.16	Benign	not_provided	QDPR	intron_variant	YES	2.694
3:182936995:C:T	.	4	9887824	G	A	SLC2A9	intron_variant	30	168	0.178571	0.0313	0.26	0.1944	0.18	Benign	not_provided	SLC2A9	intron_variant	YES	1.535
3:184538523:C:T	rs10025164	4	5615568	T	C	EVC2	intron_variant	167	168	0.994048	0	0	0.0278	0	Benign	not_specified|not_provided	EVC2	intron_variant	YES	0.217
3:184538523:C:T	rs10025164	4	5615568	T	C	EVC2	intron_variant&non_coding_transcript_variant	167	168	0.994048	0	0	0.0278	0	Benign	not_specified|not_provided	EVC2	intron_variant	NO	0.217
3:184586291:A:G	rs4689273	4	5663474	G	A	EVC2	intron_variant	75	168	0.446429	0.75	0.72	0.3889	0.38	Benign	not_provided	EVC2	intron_variant	YES	0.713
3:184586291:A:G	rs4689273	4	5663474	G	A	EVC2	intron_variant&non_coding_transcript_variant	75	168	0.446429	0.75	0.72	0.3889	0.38	Benign	not_provided	EVC2	intron_variant	NO	0.713
3:184589175:T:C	rs56338596	4	5665233	C	T	EVC2	intron_variant	113	168	0.672619	0.4375	0.46	0.1944	0.22	Benign	not_provided	EVC2	intron_variant	YES	0.576
3:184589175:T:C	rs56338596	4	5665233	C	T	EVC2	intron_variant&non_coding_transcript_variant	113	168	0.672619	0.4375	0.46	0.1944	0.22	Benign	not_provided	EVC2	intron_variant	NO	0.576
3:184611701:T:C	.	4	5685554	C	T	EVC2	intron_variant	116	168	0.690476	0.5313	0.36	0.2222	0.18	Benign	not_provided	EVC2	intron_variant	YES	1.635
3:184611701:T:C	.	4	5685554	C	T	EVC2	intron_variant&non_coding_transcript_variant	116	168	0.690476	0.5313	0.36	0.2222	0.18	Benign	not_provided	EVC2	intron_variant	NO	1.635
3:186701823:C:T	rs77094598	4	7733346	C	T	SORCS2	synonymous_variant	28	168	0.166667	0.2188	0.24	0	0.18	Benign	not_provided	SORCS2	synonymous_variant	YES	3.862
3:189044914:A:G	rs549256215	4	2835513	C	T	SH3BP2	downstream_gene_variant	167	168	0.994048	0.0313	0	0	0	Benign	Fibrous_dysplasia_of_jaw	SH3BP2	3_prime_UTR_variant	NO	1.531
3:189047008:G:T	rs202005559	4	2833685	C	A	SH3BP2	intron_variant	5	168	0.0297619	0.0625	0	0.0833	0	Benign	Fibrous_dysplasia_of_jaw	SH3BP2	intron_variant	YES	3.925
3:189048251:T:C	rs113327530	4	2832419	G	A	SH3BP2	splice_region_variant&intron_variant	167	168	0.994048	0.0313	0	0	0	Benign	Fibrous_dysplasia_of_jaw	SH3BP2	intron_variant	NO	0.616
3:189056186:G:A	rs553536573	4	2823011	C	T	SH3BP2	synonymous_variant	1	168	0.00595238	0.0313	0	0	0	Benign	Fibrous_dysplasia_of_jaw	SH3BP2	synonymous_variant	YES	2.27
3:189056228:G:A	rs113748730	4	2822969	C	T	SH3BP2	synonymous_variant	1	168	0.00595238	0.0313	0	0	0	Benign	Fibrous_dysplasia_of_jaw	SH3BP2	synonymous_variant	YES	9.414
3:190588866:A:G	rs141399202	4	1315453	C	T	MAEA	synonymous_variant	133	168	0.791667	0.2188	0.2	0.4167	0.06	Benign	not_provided	MAEA	non-coding_transcript_variant,synonymous_variant,intron_variant	YES	6.554
3:190667971:A:G	rs146416017	4	1238210	C	T	CTBP1	synonymous_variant	99	168	0.589286	0.7188	0.42	0.4444	0.18	Benign	not_provided	CTBP1	synonymous_variant	YES	0.83
3:190936115:T:C	.	4	990300	A	G	IDUA	intron_variant	81	168	0.482143	0.5938	0.5	0.6944	0.24	Benign	not_provided	IDUA	synonymous_variant,intron_variant	YES	0.716
3:190936115:T:C	.	4	990300	A	G	SLC26A1	synonymous_variant	81	168	0.482143	0.5938	0.5	0.6944	0.24	Benign	not_provided	IDUA	synonymous_variant,intron_variant	NO	0.716
3:191316004:G:A	.	4	656087	C	T	PDE6B	intron_variant	57	168	0.339286	0.2813	0.34	0.5833	0.2	Benign	not_provided	PDE6B	intron_variant	YES	1.976
3:21228110:G:A	rs538959058	4	168497115	C	T	PALLD	5_prime_UTR_variant	12	168	0.0714286	0	0.06	0.0833	0.12	Benign	Pancreatic_cancer,_susceptibility_to,_1	PALLD	5_prime_UTR_variant	YES	1.948
3:21228110:G:A	rs538959058	4	168497115	C	T	PALLD	intron_variant	12	168	0.0714286	0	0.06	0.0833	0.12	Benign	Pancreatic_cancer,_susceptibility_to,_1	PALLD	5_prime_UTR_variant	NO	1.948
3:27621876:C:T	.	4	166090911	G	A	TLL1	intron_variant	11	168	0.0654762	0.0313	0.18	0	0.02	Benign	not_provided	TLL1	intron_variant	YES	0.173
3:3386602:G:A	.	4	186601374	C	T	FAT1	missense_variant	1	168	0.00595238	0	0.02	0	0	Benign	not_provided	FAT1	synonymous_variant	NO	10.04
3:3386602:G:A	.	4	186601374	C	T	FAT1	non_coding_transcript_exon_variant	1	168	0.00595238	0	0.02	0	0	Benign	not_provided	FAT1	synonymous_variant	NO	10.04
3:3620307:G:A	.	4	186258056	T	C	KLKB1	synonymous_variant	165	168	0.982143	0.0625	0	0	0.02	Benign	not_provided	KLKB1	missense_variant,synonymous_variant	YES	0.032
3:3620307:G:A	.	4	186258056	T	C	LOC118152124	downstream_gene_variant	165	168	0.982143	0.0625	0	0	0.02	Benign	not_provided	KLKB1	missense_variant,synonymous_variant	NO	0.032
3:40737917:C:T	.	4	154567943	A	G	FGB	intron_variant	166	168	0.988095	0.0625	0	0	0	Benign	not_provided	FGB	intron_variant	YES	9.311
3:4404771:C:T	rs148448282	4	185418625	A	G	UFSP2	non_coding_transcript_exon_variant	152	168	0.904762	0	0.12	0.1944	0.06	Benign	not_provided	UFSP2	non-coding_transcript_variant,synonymous_variant	NO	0.222
3:4404771:C:T	rs148448282	4	185418625	A	G	UFSP2	synonymous_variant	152	168	0.904762	0	0.12	0.1944	0.06	Benign	not_provided	UFSP2	non-coding_transcript_variant,synonymous_variant	YES	0.222
3:4676200:C:T	rs190251889	4	185147248	C	T	SLC25A4	3_prime_UTR_variant	6	168	0.0357143	0	0.08	0.0278	0.02	Benign	Progressive_external_ophthalmoplegia_with_mitochondrial_DNA_deletions,_autosomal_dominant_2	SLC25A4	3_prime_UTR_variant	YES	8.336
3:4678792:C:T	rs539027516	4	185150041	C	T	SLC25A4	downstream_gene_variant	6	168	0.0357143	0	0.06	0.0556	0.02	Benign	Progressive_external_ophthalmoplegia_with_mitochondrial_DNA_deletions,_autosomal_dominant_2	SLC25A4	3_prime_UTR_variant	NO	0.58
3:47114774:T:C	rs5525	4	148435364	A	G	NR3C2	synonymous_variant	21	168	0.125	0.375	0.06	0.0556	0.08	Benign	Autosomal_dominant_pseudohypoaldosteronism_type_1|not_specified|not_provided	NR3C2	non-coding_transcript_variant,synonymous_variant	YES	2.375
3:6065425:A:G	.	4	183712527	T	C	TRAPPC11	intron_variant	147	168	0.875	0.9688	0.82	0.8889	0.86	Benign	not_provided	TRAPPC11	intron_variant	YES	3.926
3:6085789:G:A	.	4	183698107	T	C	TRAPPC11	intron_variant	147	168	0.875	0.0313	0.18	0.1111	0.14	Benign	not_provided	TRAPPC11	intron_variant	YES	0.534
3:7000688:T:C	rs78558114	4	182773656	G	A	TENM3	intron_variant	167	168	0.994048	0	0.02	0	0	Benign	not_provided	TENM3	intron_variant	YES	0.293
3:7100176:C:T	rs79195097	4	182680513	G	A	TENM3	intron_variant	4	168	0.0238095	0	0	0	0.08	Benign	not_provided	TENM3	intron_variant	YES	10.76
3:75654938:G:A	.	4	120799616	T	C	PRDM5	intron_variant	161	168	0.958333	0.1563	0.04	0	0	Benign	not_provided	PRDM5	intron_variant	YES	5.501
3:82540691:C:A	rs62313243	4	113341945	T	G	ANK2	intron_variant	33	168	0.196429	0.8438	0.92	0.6944	0.74	Benign	not_provided	ANK2	intron_variant	YES	0.032
3:92966847:C:T	.	4	103138385	G	A	CENPE	missense_variant	90	168	0.535714	0.5938	0.56	0.5278	0.48	Benign	Microcephaly_13,_primary,_autosomal_recessive|not_provided	CENPE	missense_variant	YES	6.41
3:96751664:G:A	rs41275697	4	99315970	C	T	ADH1B	synonymous_variant	16	168	0.0952381	0	0.12	0.0833	0.14	Benign	not_provided	ADH1B	synonymous_variant	YES	4.219
4:110644117:G:A	rs61733387	6	107872813	A	G	SEC63	synonymous_variant	160	168	0.952381	0.0625	0.04	0.0833	0.02	Benign	Polycystic_liver_disease_2|not_provided	SEC63	synonymous_variant	YES	3.843
4:112256195:C:T	.	6	109448797	C	T	MICAL1	synonymous_variant	17	168	0.10119	0	0.08	0.1667	0.14	Benign	not_provided	MICAL1	synonymous_variant	YES	1.477
4:112288230:G:A	rs192918926	6	109482013	G	A	ZBTB24	missense_variant	5	168	0.0297619	0.125	0.02	0	0	Benign	Immunodeficiency-centromeric_instability-facial_anomalies_syndrome_2	ZBTB24	missense_variant	YES	13.47
4:112288230:G:A	rs192918926	6	109482013	G	A	ZBTB24	non_coding_transcript_exon_variant	5	168	0.0297619	0.125	0.02	0	0	Benign	Immunodeficiency-centromeric_instability-facial_anomalies_syndrome_2	ZBTB24	missense_variant	NO	13.47
4:124380621:G:A	.	6	121308021	G	A	TBC1D32	synonymous_variant	1	168	0.00595238	0	0.02	0	0	Benign	not_provided	TBC1D32	non-coding_transcript_variant,synonymous_variant	YES	8.775
4:132600191:C:T	rs17057158	6	129349403	C	T	LAMA2	intron_variant	3	168	0.0178571	0	0.04	0	0.02	Benign	Merosin_deficient_congenital_muscular_dystrophy|LAMA2-related_muscular_dystrophy|not_specified|not_provided	LAMA2	intron_variant	YES	0.104
4:136817755:C:T	.	6	133506215	C	T	EYA4	intron_variant	8	168	0.047619	0.0625	0.04	0.0833	0.02	Benign	Dilated_cardiomyopathy_1J	EYA4	non-coding_transcript_variant,intron_variant	YES	0.931
4:147875674:T:C	rs1139836	6	144461235	T	C	UTRN	synonymous_variant	48	168	0.285714	0.3438	0.32	0.2778	0.22	Benign	not_provided	UTRN	synonymous_variant	YES	0.587
4:147888220:A:G	.	6	144474909	A	G	UTRN	intron_variant	3	168	0.0178571	0	0	0	0.06	Benign	not_provided	UTRN	intron_variant	YES	0.396
4:147899200:C:T	.	6	144485555	C	T	UTRN	intron_variant	66	168	0.392857	0.3438	0.46	0.5	0.28	Benign	not_provided	UTRN	intron_variant	YES	0.906
4:151986983:G:A	rs141946222	6	148544797	G	A	SASH1	synonymous_variant	60	168	0.357143	0.3125	0.32	0.3333	0.44	Benign	not_provided	SASH1	synonymous_variant	YES	0.347
4:153963845:G:A	.	6	150395138	G	A	IYD	intron_variant	1	168	0.00595238	0.0313	0	0	0	Benign	not_provided	IYD	intron_variant	YES	4.28
4:153963845:G:A	.	6	150395138	G	A	IYD	intron_variant&non_coding_transcript_variant	1	168	0.00595238	0.0313	0	0	0	Benign	not_provided	IYD	intron_variant	NO	4.28
4:155921166:A:G	rs78531855	6	152359575	G	A	SYNE1	intron_variant	153	168	0.910714	0.125	0.06	0.1389	0.06	Benign	not_provided	SYNE1	intron_variant	YES	0.066
4:160766457:A:G	rs61738955	6	157201226	G	A	ARID1B	synonymous_variant	156	168	0.928571	0.0313	0.14	0.0556	0.04	Benign	Coffin-Siris_syndrome_1|Inborn_genetic_diseases|not_specified|not_provided	ARID1B	synonymous_variant	YES	2.046
4:161706724:G:A	rs114443105	6	158146829	G	A	LOC100401228	downstream_gene_variant	2	168	0.0119048	0	0.02	0	0.02	Benign	3-methylglutaconic_aciduria_with_deafness,_encephalopathy,_and_Leigh-like_syndrome|not_specified	SERAC1	missense_variant,non-coding_transcript_variant	NO	6.01
4:161706724:G:A	rs114443105	6	158146829	G	A	SERAC1	missense_variant	2	168	0.0119048	0	0.02	0	0.02	Benign	3-methylglutaconic_aciduria_with_deafness,_encephalopathy,_and_Leigh-like_syndrome|not_specified	SERAC1	missense_variant,non-coding_transcript_variant	YES	6.01
4:161706724:G:A	rs114443105	6	158146829	G	A	SERAC1	non_coding_transcript_exon_variant	2	168	0.0119048	0	0.02	0	0.02	Benign	3-methylglutaconic_aciduria_with_deafness,_encephalopathy,_and_Leigh-like_syndrome|not_specified	SERAC1	missense_variant,non-coding_transcript_variant	NO	6.01
4:162769778:A:G	rs116342739	6	159229816	A	G	FNDC1	intron_variant	10	168	0.0595238	0.1563	0.08	0	0.02	Benign	not_provided	FNDC1	synonymous_variant	NO	15.27
4:162769778:A:G	rs116342739	6	159229816	A	G	FNDC1	splice_region_variant&synonymous_variant	10	168	0.0595238	0.1563	0.08	0	0.02	Benign	not_provided	FNDC1	synonymous_variant	NO	15.27
4:163684894:G:T	rs201942835	6	160130185	G	T	SLC22A1	missense_variant	3	168	0.0178571	0	0.06	0	0	Benign	not_provided	SLC22A1	missense_variant	YES	15.59
4:164067726:A:G	.	6	160716958	G	A	LOC118153171	intron_variant	133	168	0.791667	0.25	0.26	0.3611	0.02	Benign	not_provided	PLG	intron_variant	NO	0.011
4:164067726:A:G	.	6	160716958	G	A	PLG	intron_variant	133	168	0.791667	0.25	0.26	0.3611	0.02	Benign	not_provided	PLG	intron_variant	YES	0.011
4:164336656:C:T	rs118042662	6	161108866	C	T	MAP3K4	splice_region_variant&intron_variant	22	168	0.130952	0.1875	0.18	0.0278	0.12	Benign	not_provided	MAP3K4	intron_variant	NO	3.762
4:164336656:C:T	rs118042662	6	161108866	C	T	MAP3K4	splice_region_variant&intron_variant&non_coding_transcript_variant	22	168	0.130952	0.1875	0.18	0.0278	0.12	Benign	not_provided	MAP3K4	intron_variant	NO	3.762
4:165277932:G:A	.	6	162053861	A	G	PRKN	intron_variant	150	168	0.892857	0	0.24	0	0.12	Benign	not_provided	PRKN	intron_variant	YES	1.869
4:16762279:G:A	rs2228216	6	12120419	C	T	HIVEP1	synonymous_variant	1	168	0.00595238	0.0313	0	0	0	Benign	not_provided	HIVEP1	synonymous_variant	YES	10.93
4:169708108:T:C	.	6	166382789	C	T	MPC1	intron_variant	30	168	0.178571	0.75	0.9	0.8333	0.78	Benign	not_provided	MPC1	intron_variant	YES	10.22
4:169708263:C:A	.	6	166382945	C	A	MPC1	5_prime_UTR_variant	90	168	0.535714	0.625	0.54	0.6111	0.42	Benign	not_provided	MPC1		NO	2.875
4:170367140:G:A	.	6	166952476	A	G	RNASET2	intron_variant	165	168	0.982143	0.0625	0	0	0.02	Benign	not_provided	RNASET2	intron_variant	YES	0.317
4:172605771:A:G	rs59953407	6	169220268	G	A	THBS2	synonymous_variant	48	168	0.285714	0.8125	0.74	0.6944	0.64	Benign	not_provided	THBS2	non-coding_transcript_variant,synonymous_variant	YES	3.858
4:172611184:G:A	rs145307568	6	169225212	G	A	THBS2	synonymous_variant	8	168	0.047619	0	0	0.1944	0.02	Benign	not_provided	THBS2	non-coding_transcript_variant,synonymous_variant	YES	0.315
4:173236964:G:A	.	6	169766336	G	A	ERMARD	intron_variant	1	168	0.00595238	0	0	0.0278	0	Benign	not_provided	ERMARD	intron_variant	YES	4.099
4:173245824:G:A	rs41265401	6	169776050	G	A	ERMARD	missense_variant	1	168	0.00595238	0	0.02	0	0	Benign	Periventricular_nodular_heterotopia_6|not_specified|not_provided	ERMARD	missense_variant	YES	0.026
4:18197365:A:G	.	6	10528561	T	C	LOC100895187	5_prime_UTR_variant	1	168	0.00595238	0	0	0.0278	0	Benign	not_provided	GCNT2	5_prime_UTR_variant,intron_variant	NO	0.215
4:26801179:C:T	.	6	2953211	A	G	LOC108587750	intron_variant	165	168	0.982143	0.0938	0	0	0	Benign	Autosomal_recessive_nonsyndromic_hearing_loss_91|not_provided	SERPINB6	intron_variant	NO	6.561
4:2918703:C:T	rs116366733	6	26026986	G	A	HFE	intron_variant	3	168	0.0178571	0	0	0.0556	0.02	Benign	not_provided	H4C2	synonymous_variant	NO	4.79
4:2918703:C:T	rs116366733	6	26026986	G	A	LOC100403034	non_coding_transcript_exon_variant	3	168	0.0178571	0	0	0.0556	0.02	Benign	not_provided	H4C2	synonymous_variant	NO	4.79
4:36097957:G:A	.	6	31865676	G	A	NEU1	upstream_gene_variant	2	168	0.0119048	0	0	0	0.04	Benign	not_provided	SLC44A4	intron_variant	NO	0.235
4:36097957:G:A	.	6	31865676	G	A	SLC44A4	intron_variant	2	168	0.0119048	0	0	0	0.04	Benign	not_provided	SLC44A4	intron_variant	YES	0.235
4:36278221:G:A	.	6	32073844	G	A	TNXB	missense_variant	6	168	0.0357143	0.0938	0.02	0.0278	0.02	Benign	Ehlers-Danlos_syndrome|not_specified|Cardiovascular_phenotype|not_provided	TNXB	missense_variant	YES	15.13
4:38069473:C:T	rs41558014	6	33076088	C	T	CAJA-DPA1	upstream_gene_variant	7	168	0.0416667	0.0938	0.06	0	0.02	Benign	not_provided	HLA-DPA1	missense_variant,intron_variant	NO	0.002
4:38069473:C:T	rs41558014	6	33076088	C	T	CAJA-DPB1	missense_variant	7	168	0.0416667	0.0938	0.06	0	0.02	Benign	not_provided	HLA-DPA1	missense_variant,intron_variant	NO	0.002
4:38131249:C:A	.	6	33171858	A	C	COL11A2	intron_variant	165	168	0.982143	0	0.06	0	0	Benign	not_provided	COL11A2	intron_variant	YES	5.071
4:38131249:C:A	.	6	33171858	A	C	LOC118153120	downstream_gene_variant	165	168	0.982143	0	0.06	0	0	Benign	not_provided	COL11A2	intron_variant	NO	5.071
4:38675164:C:T	rs138821995	6	33665145	C	T	LOC100390843	synonymous_variant	3	168	0.0178571	0	0.06	0	0	Benign	not_provided	ITPR3	synonymous_variant	NO	0.516
4:38697137:G:A	rs9469559	6	33685507	G	A	LOC100390843	missense_variant	94	168	0.559524	0.5	0.4	0.75	0.62	Benign	not_provided	ITPR3	missense_variant	NO	17.98
4:39415704:G:A	rs9469779	6	34426068	G	A	RPS10	5_prime_UTR_variant	3	168	0.0178571	0	0.06	0	0	Benign	Diamond-Blackfan_anemia_9|not_specified	RPS10	5_prime_UTR_variant	YES	16.32
4:4083396:C:T	rs35730227	6	24860965	A	G	LOC118152730	intron_variant&non_coding_transcript_variant	65	168	0.386905	0.5313	0.58	0.5833	0.72	Benign	not_specified|not_provided	RIPOR2	intron_variant	NO	2.796
4:4083396:C:T	rs35730227	6	24860965	A	G	RIPOR2	splice_region_variant&intron_variant	65	168	0.386905	0.5313	0.58	0.5833	0.72	Benign	not_specified|not_provided	RIPOR2	intron_variant	NO	2.796
4:4097439:G:A	.	6	24847657	C	T	LOC118152730	intron_variant&non_coding_transcript_variant	4	168	0.0238095	0	0	0.1111	0	Benign	not_provided	RIPOR2	missense_variant,intron_variant	NO	20.3
4:4097439:G:A	.	6	24847657	C	T	RIPOR2	intron_variant	4	168	0.0238095	0	0	0.1111	0	Benign	not_provided	RIPOR2	missense_variant,intron_variant	YES	20.3
4:4097439:G:A	.	6	24847657	C	T	RIPOR2	missense_variant	4	168	0.0238095	0	0	0.1111	0	Benign	not_provided	RIPOR2	missense_variant,intron_variant	YES	20.3
4:43918628:T:C	rs1678746	6	38852768	C	T	DNAH8	non_coding_transcript_exon_variant	165	168	0.982143	0	0.06	0	0	Benign	Primary_ciliary_dyskinesia|not_provided	DNAH8	synonymous_variant	NO	0.413
4:43918628:T:C	rs1678746	6	38852768	C	T	DNAH8	synonymous_variant	165	168	0.982143	0	0.06	0	0	Benign	Primary_ciliary_dyskinesia|not_provided	DNAH8	synonymous_variant	YES	0.413
4:43918683:T:G	.	6	38852823	T	G	DNAH8	intron_variant	3	168	0.0178571	0	0.06	0	0	Benign	not_provided	DNAH8	intron_variant	YES	3.498
4:43918683:T:G	.	6	38852823	T	G	DNAH8	intron_variant&non_coding_transcript_variant	3	168	0.0178571	0	0.06	0	0	Benign	not_provided	DNAH8	intron_variant	NO	3.498
4:4409325:C:T	.	6	24527681	G	A	ALDH5A1	intron_variant	2	168	0.0119048	0	0.02	0	0.02	Benign	not_provided	ALDH5A1	intron_variant	YES	0.335
4:48291358:A:G	rs61996308	6	43132536	G	A	PTK7	intron_variant	50	168	0.297619	0.6563	0.58	0.9167	0.7	Benign	not_provided	PTK7	non-coding_transcript_variant,synonymous_variant	NO	1.229
4:48291358:A:G	rs61996308	6	43132536	G	A	PTK7	synonymous_variant	50	168	0.297619	0.6563	0.58	0.9167	0.7	Benign	not_provided	PTK7	non-coding_transcript_variant,synonymous_variant	YES	1.229
4:48715268:G:A	.	6	43558292	G	A	POLR1C	intron_variant	3	168	0.0178571	0	0.06	0	0	Benign	not_provided	POLR1C	intron_variant	YES	5.689
4:48715268:G:A	.	6	43558292	G	A	XPO5	intron_variant	3	168	0.0178571	0	0.06	0	0	Benign	not_provided	POLR1C	intron_variant	NO	5.689
4:48779872:G:A	rs114689090	6	43625813	G	A	GTPBP2	synonymous_variant	33	168	0.196429	0.25	0.14	0.3056	0.14	Benign	not_provided	POLR1C	synonymous_variant,intron_variant	NO	2.76
4:48779872:G:A	rs114689090	6	43625813	G	A	LOC118153209	upstream_gene_variant	33	168	0.196429	0.25	0.14	0.3056	0.14	Benign	not_provided	POLR1C	synonymous_variant,intron_variant	NO	2.76
4:50600030:C:T	.	6	45491677	C	T	RUNX2	intron_variant	3	168	0.0178571	0	0.06	0	0	Benign	not_provided	RUNX2	intron_variant	YES	0.296
4:50657662:C:T	rs186219428	6	45549579	C	T	RUNX2	3_prime_UTR_variant	6	168	0.0357143	0.0313	0	0.0833	0.04	Benign	Cleidocranial_dysostosis	RUNX2	3_prime_UTR_variant	YES	14.41
4:54526459:C:T	.	6	49619514	T	C	RHAG	intron_variant	97	168	0.577381	0.4063	0.44	0.1667	0.6	Benign	not_provided	RHAG	intron_variant	YES	0.418
4:57043200:G:A	rs1896976	6	52059976	A	G	PKHD1	synonymous_variant	135	168	0.803571	0	0.32	0.2778	0.14	Benign	Polycystic_kidney_disease|Autosomal_recessive_polycystic_kidney_disease|Polycystic_kidney_disease_4|not_specified|not_provided	PKHD1	synonymous_variant	YES	6.687
4:57053215:T:C	.	6	52069244	T	C	PKHD1	intron_variant	2	168	0.0119048	0.0625	0	0	0	Benign	not_provided	PKHD1	intron_variant	YES	4.609
4:66734007:A:C	.	6	64813218	A	C	EYS	intron_variant	24	168	0.142857	0.2188	0.2	0	0.14	Benign	Retinitis_pigmentosa_25|not_provided	EYS	intron_variant	YES	0.084
4:67307156:C:T	.	6	65332810	C	T	EYS	intron_variant	4	168	0.0238095	0	0.06	0.0278	0	Benign	not_provided	EYS	intron_variant	YES	6.117
4:71438951:G:A	rs34327883	6	69713759	G	A	LMBRD1	synonymous_variant	3	168	0.0178571	0	0.06	0	0	Benign	Methylmalonic_aciduria_and_homocystinuria_type_cblF|not_specified	LMBRD1	synonymous_variant	YES	0.419
4:73934971:G:A	rs114505309	6	72182680	G	A	RIMS1	synonymous_variant	2	168	0.0119048	0	0.04	0	0	Benign	Cone-rod_dystrophy_7|not_specified|not_provided	RIMS1	synonymous_variant	YES	13.04
4:74372170:G:C	.	6	72622393	C	G	KCNQ5	synonymous_variant	165	168	0.982143	0	0.04	0	0.02	Benign	not_provided	KCNQ5	synonymous_variant	YES	7.446
4:77018953:C:T	rs35170847	6	75175267	C	T	COL12A1	intron_variant	27	168	0.160714	0.1563	0.28	0.1111	0.08	Benign	Ullrich_congenital_muscular_dystrophy_2|Bethlem_myopathy_2|not_specified|not_provided	COL12A1	synonymous_variant,intron_variant	YES	8.806
4:77018953:C:T	rs35170847	6	75175267	C	T	COL12A1	synonymous_variant	27	168	0.160714	0.1563	0.28	0.1111	0.08	Benign	Ullrich_congenital_muscular_dystrophy_2|Bethlem_myopathy_2|not_specified|not_provided	COL12A1	synonymous_variant,intron_variant	YES	8.806
4:77933791:G:A	.	6	76022137	G	A	IMPG1	synonymous_variant	5	168	0.0297619	0	0	0	0.1	Benign	not_specified|not_provided	IMPG1	synonymous_variant	YES	0.146
4:82229709:A:G	.	6	80129425	A	G	BCKDHB	intron_variant	4	168	0.0238095	0	0.08	0	0	Benign	not_provided	BCKDHB	intron_variant	YES	7.661
4:82229709:A:G	.	6	80129425	A	G	BCKDHB	intron_variant&non_coding_transcript_variant	4	168	0.0238095	0	0.08	0	0	Benign	not_provided	BCKDHB	intron_variant	NO	7.661
5:103655433:T:C	rs199981422	17	28758321	G	A	FAM222B	synonymous_variant	37	168	0.220238	0.9063	0.8	0.8056	0.66	Benign	not_provided	FAM222B	synonymous_variant	YES	3.32
5:104559810:C:T	rs34719207	17	27780814	G	A	NOS2	synonymous_variant	5	168	0.0297619	0	0.02	0.0556	0.04	Benign	not_provided	NOS2	synonymous_variant	YES	1.548
5:105868152:T:C	rs114529583	17	5521616	C	T	LOC118153819	intron_variant&non_coding_transcript_variant	165	168	0.982143	0	0	0.0833	0	Benign	not_provided	NLRP1	missense_variant	NO	0.005
5:105868152:T:C	rs114529583	17	5521616	C	T	NLRP1	missense_variant	165	168	0.982143	0	0	0.0833	0	Benign	not_provided	NLRP1	missense_variant	YES	0.005
5:105868152:T:C	rs114529583	17	5521616	C	T	NLRP1	non_coding_transcript_exon_variant	165	168	0.982143	0	0	0.0833	0	Benign	not_provided	NLRP1	missense_variant	NO	0.005
5:108018735:G:A	rs61731971	17	57114515	C	T	AKAP1	synonymous_variant	10	168	0.0595238	0	0.08	0.1111	0.04	Benign	not_provided	AKAP1	synonymous_variant	YES	0.957
5:108219575:G:A	rs7213666	17	56908513	C	T	TRIM25	synonymous_variant	5	168	0.0297619	0.125	0.02	0	0	Benign	not_provided	TRIM25	synonymous_variant	YES	0.389
5:11177421:G:A	rs149665640	20	6075715	G	A	FERMT1	3_prime_UTR_variant	8	168	0.047619	0.125	0.02	0	0.06	Benign	Kindler_syndrome	FERMT1	3_prime_UTR_variant	YES	1.207
5:119644419:G:A	rs3785546	17	43064916	T	C	BRCA1	intron_variant	167	168	0.994048	0	0	0.0278	0	Benign	Breast-ovarian_cancer,_familial,_susceptibility_to,_1	BRCA1	intron_variant	YES	0.183
5:119852941:C:T	rs34987927	17	42854591	G	A	AOC2	downstream_gene_variant	14	168	0.0833333	0.125	0.08	0.0278	0.1	Benign	not_provided	AOC3	missense_variant,non-coding_transcript_variant	NO	0.003
5:119852941:C:T	rs34987927	17	42854591	G	A	LOC100413669	missense_variant	14	168	0.0833333	0.125	0.08	0.0278	0.1	Benign	not_provided	AOC3	missense_variant,non-coding_transcript_variant	NO	0.003
5:120006510:T:C	rs61738809	17	42693523	A	G	CNTNAP1	synonymous_variant	108	168	0.642857	0.75	0.7	0.6944	0.48	Benign	not_provided	CNTNAP1	synonymous_variant	YES	3.441
5:123296484:G:A	.	17	68395135	G	A	ARSG	intron_variant	6	168	0.0357143	0	0	0	0.12	Benign	not_provided	ARSG	missense_variant	NO	9.39
5:123296484:G:A	.	17	68395135	G	A	ARSG	missense_variant	6	168	0.0357143	0	0	0	0.12	Benign	not_provided	ARSG	missense_variant	YES	9.39
5:127878850:C:T	rs78761885	17	73084842	C	T	SLC39A11	5_prime_UTR_variant	19	168	0.113095	0.1875	0.12	0.1944	0	Benign	not_provided	SLC39A11	missense_variant	NO	31
5:127878850:C:T	rs78761885	17	73084842	C	T	SLC39A11	intron_variant	19	168	0.113095	0.1875	0.12	0.1944	0	Benign	not_provided	SLC39A11	missense_variant	NO	31
5:127878850:C:T	rs78761885	17	73084842	C	T	SLC39A11	missense_variant	19	168	0.113095	0.1875	0.12	0.1944	0	Benign	not_provided	SLC39A11	missense_variant	YES	31
5:129088848:C:T	.	17	74305569	C	T	DNAI2	intron_variant	3	168	0.0178571	0	0.06	0	0	Benign	not_provided	DNAI2	intron_variant	YES	0.2
5:129088848:C:T	.	17	74305569	C	T	DNAI2	intron_variant&non_coding_transcript_variant	3	168	0.0178571	0	0.06	0	0	Benign	not_provided	DNAI2	intron_variant	NO	0.2
5:129091494:A:G	rs200587166	17	74310154	A	G	DNAI2	missense_variant	1	168	0.00595238	0	0	0.0278	0	Benign	Primary_ciliary_dyskinesia	DNAI2	non-coding_transcript_variant,synonymous_variant	NO	0.154
5:129091494:A:G	rs200587166	17	74310154	A	G	DNAI2	non_coding_transcript_exon_variant	1	168	0.00595238	0	0	0.0278	0	Benign	Primary_ciliary_dyskinesia	DNAI2	non-coding_transcript_variant,synonymous_variant	NO	0.154
5:130454621:A:G	rs145750695	17	75752562	G	A	ITGB4	missense_variant	145	168	0.863095	0.1563	0.18	0.1667	0.06	Benign	Junctional_epidermolysis_bullosa_with_pyloric_atresia|not_provided	GALK1	missense_variant	NO	23.4
5:130454621:A:G	rs145750695	17	75752562	G	A	LOC118153879	downstream_gene_variant	145	168	0.863095	0.1563	0.18	0.1667	0.06	Benign	Junctional_epidermolysis_bullosa_with_pyloric_atresia|not_provided	GALK1	missense_variant	NO	23.4
5:133034837:G:A	.	17	78449717	G	A	DNAH17	intron_variant	1	168	0.00595238	0.0313	0	0	0	Benign	not_provided	DNAH17	intron_variant	YES	0.36
5:133109219:G:A	.	17	78515189	G	A	DNAH17	intron_variant	2	168	0.0119048	0	0.04	0	0	Benign	not_provided	DNAH17	intron_variant	YES	4.184
5:133395782:G:A	rs147635914	17	78828991	G	A	USP36	5_prime_UTR_variant	1	168	0.00595238	0	0	0	0.02	Benign	not_provided	USP36	non-coding_transcript_variant,synonymous_variant,5_prime_UTR_variant,intron_variant	YES	14.53
5:133395782:G:A	rs147635914	17	78828991	G	A	USP36	synonymous_variant	1	168	0.00595238	0	0	0	0.02	Benign	not_provided	USP36	non-coding_transcript_variant,synonymous_variant,5_prime_UTR_variant,intron_variant	YES	14.53
5:133395782:G:A	rs147635914	17	78828991	G	A	USP36	upstream_gene_variant	1	168	0.00595238	0	0	0	0.02	Benign	not_provided	USP36	non-coding_transcript_variant,synonymous_variant,5_prime_UTR_variant,intron_variant	NO	14.53
5:134769811:T:C	.	17	80214457	C	T	CARD14	downstream_gene_variant	161	168	0.958333	0	0	0.0833	0.08	Benign	not_provided	SGSH	intron_variant	NO	0.003
5:134769811:T:C	.	17	80214457	C	T	SGSH	intron_variant	161	168	0.958333	0	0	0.0833	0.08	Benign	not_provided	SGSH	intron_variant	YES	0.003
5:135491465:G:A	rs61037507	17	80994680	G	A	CHMP6	missense_variant	7	168	0.0416667	0	0	0.0833	0.08	Benign	not_provided	CHMP6	missense_variant	YES	28.5
5:136511321:G:A	rs146570982	17	82081282	G	A	FASN	synonymous_variant	3	168	0.0178571	0.0625	0	0	0.02	Benign	Epileptic_encephalopathy	FASN	synonymous_variant	YES	1.72
5:136515348:C:T	rs201599707	17	82085397	C	T	FASN	synonymous_variant	1	168	0.00595238	0	0.02	0	0	Benign	Epileptic_encephalopathy	FASN	synonymous_variant	YES	4.499
5:137349840:C:T	.	17	82905981	T	C	TBCD	missense_variant	67	168	0.39881	0.9063	0.48	0.4167	0.66	Benign	Early-onset_progressive_diffuse_brain_atrophy-microcephaly-muscle_weakness-optic_atrophy_syndrome|not_provided	TBCD	missense_variant	YES	0.192
5:13842015:A:C	.	20	8790285	A	C	PLCB1	intron_variant	7	168	0.0416667	0.0625	0.06	0.0278	0.02	Benign	Developmental_and_epileptic_encephalopathy,_12|not_provided	PLCB1	intron_variant	YES	6.58
5:138939719:G:A	.	13	20463763	G	A	CRYL1	intron_variant	1	168	0.00595238	0	0	0	0.02	Benign	not_provided	CRYL1	intron_variant	YES	3.681
5:140034291:T:C	rs181623879	13	21702846	T	C	FGF9	3_prime_UTR_variant	59	168	0.35119	0.4063	0.34	0.2778	0.38	Benign	Multiple_synostoses_syndrome_3	FGF9	3_prime_UTR_variant	YES	3.239
5:146015796:T:C	.	13	28049622	C	T	FLT3	intron_variant	159	168	0.946429	0.0313	0.1	0.0556	0.02	Benign	not_provided	FLT3	intron_variant	YES	5.034
5:150333485:T:A	rs191749285	13	32317246	T	A	BRCA2	intron_variant	6	168	0.0357143	0	0	0.1667	0	Benign	Breast-ovarian_cancer,_familial,_susceptibility_to,_2	BRCA2	intron_variant	YES	3.989
5:150333485:T:A	rs191749285	13	32317246	T	A	ZAR1L	upstream_gene_variant	6	168	0.0357143	0	0	0.1667	0	Benign	Breast-ovarian_cancer,_familial,_susceptibility_to,_2	BRCA2	intron_variant	NO	3.989
5:154894773:A:G	rs113331638	13	36879726	G	A	SMAD9	5_prime_UTR_variant	79	168	0.470238	0.7188	0.52	0.2778	0.6	Benign	not_specified	SMAD9	5_prime_UTR_variant	YES	1.116
5:231196:T:C	rs200856791	20	36897876	G	A	SAMHD1	non_coding_transcript_exon_variant	135	168	0.803571	0.0938	0.22	0.3889	0.1	Benign	Aicardi-Goutieres_syndrome_5|Chilblain_lupus_2	SAMHD1	synonymous_variant	NO	0.158
5:231196:T:C	rs200856791	20	36897876	G	A	SAMHD1	synonymous_variant	135	168	0.803571	0.0938	0.22	0.3889	0.1	Benign	Aicardi-Goutieres_syndrome_5|Chilblain_lupus_2	SAMHD1	synonymous_variant	YES	0.158
5:23367961:T:C	rs144542988	20	18510901	C	T	SEC23B	synonymous_variant	163	168	0.970238	0.0938	0.02	0	0.02	Benign	Congenital_dyserythropoietic_anemia,_type_II|Cowden_syndrome_7|not_provided	SEC23B	synonymous_variant	YES	2.406
5:29702238:C:T	rs145201675	20	25076062	C	T	VSX1	3_prime_UTR_variant	4	168	0.0238095	0.0938	0.02	0	0	Benign	Polymorphous_corneal_dystrophy	VSX1	non-coding_transcript_variant,3_prime_UTR_variant,intron_variant	YES	1.411
5:30737718:C:T	rs56182609	20	37394002	C	T	SRC	intron_variant	9	168	0.0535714	0.0313	0.06	0.1389	0	Benign	not_specified|not_provided	SRC	intron_variant	YES	0.023
5:3082797:G:A	rs761012335	20	34077074	T	C	RALY	synonymous_variant	166	168	0.988095	0	0	0.0556	0	Benign	not_provided	RALY	synonymous_variant	YES	0.496
5:36964441:C:T	rs2227937	20	43681786	C	T	MYBL2	splice_region_variant&synonymous_variant	1	168	0.00595238	0	0	0	0.02	Benign	not_provided	MYBL2	synonymous_variant,intron_variant	NO	6.456
5:37391940:G:A	rs7268512	20	44118614	G	A	JPH2	synonymous_variant	18	168	0.107143	0.25	0.08	0.1389	0.02	Benign	Hypertrophic_cardiomyopathy|Hypertrophic_cardiomyopathy_17|not_specified|Cardiovascular_phenotype	JPH2	synonymous_variant	YES	2.543
5:37689100:C:T	rs6130615	20	44430797	C	T	HNF4A	3_prime_UTR_variant	28	168	0.166667	0.25	0.14	0.2778	0.06	Benign	Maturity-onset_diabetes_of_the_young_type_1|Familial_hyperinsulinism|not_provided	HNF4A	3_prime_UTR_variant	YES	0.502
5:39175970:G:A	.	20	46029657	G	A	SLC12A5	intron_variant	1	168	0.00595238	0	0	0	0.02	Benign	not_provided	SLC12A5	intron_variant	YES	8.24
5:39202848:T:A	.	20	46055887	T	A	LOC103792916	upstream_gene_variant	79	168	0.470238	0.6563	0.4	0.3333	0.52	Benign	not_provided	SLC12A5	intron_variant	NO	4.253
5:39202848:T:A	.	20	46055887	T	A	SLC12A5	intron_variant	79	168	0.470238	0.6563	0.4	0.3333	0.52	Benign	not_provided	SLC12A5	intron_variant	YES	4.253
5:47508669:G:A	rs61730999	20	54157197	G	A	LOC100393283	synonymous_variant	69	168	0.410714	0.4375	0.4	0.4722	0.36	Benign	Hypercalcemia,_infantile,_1|not_provided	CYP24A1	synonymous_variant	NO	0.128
5:5197921:C:T	rs6060980	20	31832151	A	G	MYLK2	intron_variant	165	168	0.982143	0	0.06	0	0	Benign	Cardiomyopathy|Hypertrophic_cardiomyopathy_1|not_specified	MYLK2	intron_variant	YES	2.278
5:55764539:C:T	rs35907950	20	62263649	C	T	OSBPL2	synonymous_variant	7	168	0.0416667	0.0625	0.06	0.0278	0.02	Benign	not_specified|not_provided	OSBPL2	synonymous_variant,5_prime_UTR_variant	YES	0.643
5:56293545:A:G	rs142639450	20	62819981	G	A	COL9A3	missense_variant&splice_region_variant	72	168	0.428571	0.6875	0.58	0.3889	0.62	Benign	Connective_tissue_disorder|not_specified|not_provided	COL9A3	missense_variant	NO	22.9
5:56293545:A:G	rs142639450	20	62819981	G	A	OGFR	downstream_gene_variant	72	168	0.428571	0.6875	0.58	0.3889	0.62	Benign	Connective_tissue_disorder|not_specified|not_provided	COL9A3	missense_variant	NO	22.9
5:57132349:C:T	.	20	63698302	C	T	ARFRP1	downstream_gene_variant	1	168	0.00595238	0	0.02	0	0	Benign	not_provided	TNFRSF6B	non-coding_transcript_variant,synonymous_variant	NO	0.394
5:57132349:C:T	.	20	63698302	C	T	RTEL1	downstream_gene_variant	1	168	0.00595238	0	0.02	0	0	Benign	not_provided	TNFRSF6B	non-coding_transcript_variant,synonymous_variant	NO	0.394
5:57132349:C:T	.	20	63698302	C	T	RTEL1	non_coding_transcript_exon_variant	1	168	0.00595238	0	0.02	0	0	Benign	not_provided	TNFRSF6B	non-coding_transcript_variant,synonymous_variant	NO	0.394
5:57132349:C:T	.	20	63698302	C	T	RTEL1	synonymous_variant	1	168	0.00595238	0	0.02	0	0	Benign	not_provided	TNFRSF6B	non-coding_transcript_variant,synonymous_variant	NO	0.394
5:6036932:G:A	.	20	462488	A	G	TBC1D20	5_prime_UTR_variant	146	168	0.869048	0.1563	0.1	0.2222	0.08	Benign	not_provided	TBC1D20	non-coding_transcript_variant,5_prime_UTR_variant	YES	7.423
5:65334105:C:T	.	17	1658394	G	A	PRPF8	intron_variant	53	168	0.315476	0.0313	0.38	0.3333	0.42	Benign	not_provided	PRPF8	intron_variant	YES	0.034
5:65824070:C:T	rs113716355	17	3524243	C	T	TRPV3	synonymous_variant	36	168	0.214286	0.2188	0.18	0.25	0.22	Benign	Isolated_focal_non-epidermolytic_palmoplantar_keratoderma	TRPV3	synonymous_variant	YES	1.577
5:65831062:G:A	rs779350392	17	3530027	G	A	TRPV3	splice_region_variant&synonymous_variant	25	168	0.14881	0.2188	0.14	0.1667	0.1	Benign	Isolated_focal_non-epidermolytic_palmoplantar_keratoderma	TRPV3	synonymous_variant	NO	4.323
5:65831068:G:A	rs141578451	17	3530033	G	A	TRPV3	synonymous_variant	9	168	0.0535714	0	0	0.1944	0.04	Benign	Isolated_focal_non-epidermolytic_palmoplantar_keratoderma	TRPV3	synonymous_variant	YES	7.703
5:65842619:C:T	rs771432151	17	3542676	C	T	TRPV3	synonymous_variant	4	168	0.0238095	0	0.04	0.0556	0	Benign	Isolated_focal_non-epidermolytic_palmoplantar_keratoderma	TRPV3	synonymous_variant	YES	2.803
5:69265263:C:T	.	17	43643834	T	C	MEOX1	intron_variant	167	168	0.994048	0	0	0.0278	0	Benign	not_provided	MEOX1	intron_variant	YES	0.051
5:72742543:C:T	rs56289614	17	7511549	C	T	POLR2A	synonymous_variant	92	168	0.547619	0.4688	0.58	0.7222	0.44	Benign	not_provided	POLR2A	synonymous_variant	YES	0.482
5:7329096:C:T	rs113658773	20	1922629	C	T	LOC100400378	synonymous_variant	31	168	0.184524	0.2188	0.2	0.1944	0.14	Benign	not_provided	SIRPA	synonymous_variant	NO	2.762
5:75830059:G:A	.	17	10650620	A	G	MYH3	intron_variant	105	168	0.625	0.5313	0.3	0.4444	0.3	Benign	not_provided	MYH3	intron_variant	YES	1.281
5:78049867:C:T	rs28730829	17	12763317	C	T	MYOCD	synonymous_variant	108	168	0.642857	0.5625	0.58	0.6667	0.74	Benign	not_provided	MYOCD	non-coding_transcript_variant,synonymous_variant	YES	0.093
5:7810076:G:A	.	20	2403738	G	A	TGM6	synonymous_variant	92	168	0.547619	0.5938	0.54	0.4167	0.62	Benign	not_specified	TGM6	synonymous_variant	YES	0.039
5:78290316:T:C	.	17	12998524	T	C	ELAC2	intron_variant	4	168	0.0238095	0	0.06	0	0.02	Benign	Combined_oxidative_phosphorylation_defect_type_17	ELAC2	intron_variant	YES	0.072
5:8190047:C:T	.	20	2864265	C	T	VPS16	synonymous_variant	2	168	0.0119048	0	0.02	0.0278	0	Benign	not_provided	PTPRA	synonymous_variant,5_prime_UTR_variant	NO	6.4
5:8803160:C:T	.	20	3471303	T	C	ATRN	synonymous_variant	145	168	0.863095	0.3125	0.14	0.1667	0	Benign	not_provided	ATRN	synonymous_variant,intron_variant	YES	13.74
5:90402783:A:G	rs62066634	17	41612490	C	T	KRT16	missense_variant	66	168	0.392857	0.875	0.54	0.6389	0.48	Benign	not_provided	KRT16	missense_variant	YES	8.696
5:90402783:A:G	rs62066634	17	41612490	C	T	LOC118153763	downstream_gene_variant	66	168	0.392857	0.875	0.54	0.6389	0.48	Benign	not_provided	KRT16	missense_variant	NO	8.696
5:90405225:C:T	.	17	41610014	G	A	KRT16	missense_variant	2	168	0.0119048	0	0	0	0.04	Benign	not_provided	KRT16	missense_variant	YES	17.44
5:90405225:C:T	.	17	41610014	G	A	LOC118153763	downstream_gene_variant	2	168	0.0119048	0	0	0	0.04	Benign	not_provided	KRT16	missense_variant	NO	17.44
5:90515494:A:G	.	17	41502347	C	T	KRT13	intron_variant	159	168	0.946429	0.0938	0.08	0	0.04	Benign	not_provided	KRT13	intron_variant	YES	5.056
5:91347464:G:A	rs139223285	17	40755029	C	T	KRT25	synonymous_variant	6	168	0.0357143	0.0313	0.04	0.0556	0.02	Benign	not_provided	KRT25	synonymous_variant	YES	9.139
5:91979200:G:A	rs114562657	17	58561539	G	A	TEX14	missense_variant	27	168	0.160714	0.1875	0.2	0.0556	0.18	Benign	not_provided	TEX14	missense_variant	YES	22.7
5:97467091:T:C	.	17	35750213	G	A	GAS2L2	missense_variant	109	168	0.64881	0.3438	0.4	0.3889	0.28	Benign	not_specified|not_provided	GAS2L2	missense_variant	YES	21.1
5:97792520:A:G	.	17	35180604	C	T	UNC45B	synonymous_variant	162	168	0.964286	0	0.06	0	0.06	Benign	not_provided	UNC45B	synonymous_variant	YES	8.074
6:103178293:G:A	.	2	120927641	A	G	GLI2	intron_variant	153	168	0.910714	0.1563	0.04	0.1111	0.08	Benign	not_provided	GLI2	intron_variant	YES	0.335
6:103201027:C:T	.	2	120951008	C	T	GLI2	intron_variant	15	168	0.0892857	0	0.08	0.1944	0.08	Benign	not_provided	GLI2	intron_variant	YES	0.383
6:103235881:C:T	rs137960978	2	120982781	C	T	GLI2	synonymous_variant	8	168	0.047619	0.0938	0.04	0	0.06	Benign	Holoprosencephaly_9|Postaxial_polydactyly-anterior_pituitary_anomalies-facial_dysmorphism_syndrome	GLI2	synonymous_variant	YES	0.936
6:126919422:G:A	rs150237984	2	207767209	G	A	FZD5	synonymous_variant	26	168	0.154762	0.0938	0.16	0.1389	0.2	Benign	not_provided	FZD5	synonymous_variant	YES	12.04
6:126919422:G:A	rs150237984	2	207767209	G	A	LOC100897063	upstream_gene_variant	26	168	0.154762	0.0938	0.16	0.1389	0.2	Benign	not_provided	FZD5	synonymous_variant	NO	12.04
6:127477532:C:T	rs61752187	2	208325529	C	T	PIKFYVE	synonymous_variant	39	168	0.232143	0.4375	0.32	0.0556	0.14	Benign	Fleck_corneal_dystrophy|not_provided	PIKFYVE	synonymous_variant	YES	0.184
6:128473650:A:G	rs142352023	2	189728034	C	T	LOC100391710	synonymous_variant	166	168	0.988095	0.0625	0	0	0	Benign	not_provided	ANKAR	synonymous_variant	NO	0.679
6:128600084:C:T	.	2	130194376	G	A	.	intergenic_variant	61	168	0.363095	0.5625	0.36	0.4167	0.2	Benign	not_provided	MZT2B	missense_variant	NO	24.4
6:129410916:T:C	rs73003402	2	209982201	C	T	LOC118154656	intron_variant&non_coding_transcript_variant	164	168	0.97619	0.0313	0.02	0.0278	0.02	Benign	not_provided	UNC80	synonymous_variant	NO	8.46
6:129410916:T:C	rs73003402	2	209982201	C	T	UNC80	synonymous_variant	164	168	0.97619	0.0313	0.02	0.0278	0.02	Benign	not_provided	UNC80	synonymous_variant	YES	8.46
6:134833039:A:G	rs75086019	2	215319722	A	G	ATIC	missense_variant	68	168	0.404762	0.3438	0.5	0.3611	0.38	Benign	not_provided	ATIC	missense_variant	YES	1.227
6:138195498:T:C	rs114062474	2	218748884	C	T	TTLL4	synonymous_variant	123	168	0.732143	0.2188	0.34	0.1944	0.28	Benign	not_provided	TTLL4	synonymous_variant	YES	0.097
6:138680055:A:G	rs61747683	2	219233429	A	G	ANKZF1	missense_variant	2	168	0.0119048	0.0625	0	0	0	Benign	not_provided	ANKZF1	missense_variant	YES	16.45
6:138680055:A:G	rs61747683	2	219233429	A	G	ANKZF1	non_coding_transcript_exon_variant	2	168	0.0119048	0.0625	0	0	0	Benign	not_provided	ANKZF1	missense_variant	NO	16.45
6:138680055:A:G	rs61747683	2	219233429	A	G	ATG9A	upstream_gene_variant	2	168	0.0119048	0.0625	0	0	0	Benign	not_provided	ANKZF1	missense_variant	NO	16.45
6:138680055:A:G	rs61747683	2	219233429	A	G	GLB1L	downstream_gene_variant	2	168	0.0119048	0.0625	0	0	0	Benign	not_provided	ANKZF1	missense_variant	NO	16.45
6:138684303:C:T	rs73077102	2	219237136	T	C	ANKZF1	downstream_gene_variant	166	168	0.988095	0	0.02	0	0.02	Benign	not_provided	GLB1L	missense_variant	NO	0.378
6:138684303:C:T	rs73077102	2	219237136	T	C	GLB1L	missense_variant	166	168	0.988095	0	0.02	0	0.02	Benign	not_provided	GLB1L	missense_variant	YES	0.378
6:139001634:G:A	rs373081802	2	219552564	G	A	OBSL1	synonymous_variant	4	168	0.0238095	0.0938	0	0	0.02	Benign	3M_syndrome_2|not_provided	OBSL1	synonymous_variant	YES	11.49
6:139001634:G:A	rs373081802	2	219552564	G	A	TMEM198	downstream_gene_variant	4	168	0.0238095	0.0938	0	0	0.02	Benign	3M_syndrome_2|not_provided	OBSL1	synonymous_variant	NO	11.49
6:141657859:G:A	rs45624434	2	222201724	G	A	PAX3	intron_variant	1	168	0.00595238	0	0	0.0278	0	Benign	Craniofacial-deafness-hand_syndrome|Waardenburg_syndrome	PAX3	3_prime_UTR_variant,intron_variant	YES	17.38
6:143902150:A:G	rs3768898	2	224472053	A	G	CUL3	downstream_gene_variant	25	168	0.14881	0.1563	0.1	0.2222	0.14	Benign	Autosomal_dominant_pseudohypoaldosteronism_type_1|Pseudohypoaldosteronism_type_2E	CUL3	3_prime_UTR_variant	NO	0.243
6:146397736:A:G	.	2	227057299	A	G	COL4A4	intron_variant	12	168	0.0714286	0.125	0	0.1944	0.02	Benign	Alport_syndrome|not_provided	COL4A4	intron_variant	YES	6.271
6:146434624:A:G	rs34509421	2	227101892	A	G	COL4A4	synonymous_variant	6	168	0.0357143	0.125	0	0.0556	0	Benign	Focal_segmental_glomerulosclerosis|Autosomal_recessive_Alport_syndrome|Alport_syndrome|not_specified|not_provided	COL4A4	synonymous_variant	YES	4.137
6:146614808:T:C	.	2	227280111	T	C	COL4A3	intron_variant	2	168	0.0119048	0.0625	0	0	0	Benign	not_provided	COL4A3	intron_variant	YES	4.065
6:146614808:T:C	.	2	227280111	T	C	COL4A4	intron_variant	2	168	0.0119048	0.0625	0	0	0	Benign	not_provided	COL4A3	intron_variant	NO	4.065
6:146642688:A:G	.	2	227309633	G	A	COL4A3	intron_variant	3	168	0.0178571	1	1	0.9722	0.96	Benign	not_provided	COL4A3	intron_variant	YES	0.251
6:146642688:A:G	.	2	227309633	G	A	COL4A4	intron_variant	3	168	0.0178571	1	1	0.9722	0.96	Benign	not_provided	COL4A3	intron_variant	NO	0.251
6:151380111:G:A	rs745936781	2	232263348	G	A	DIS3L2	missense_variant	89	168	0.529762	0.6875	0.42	0.5833	0.5	Benign	Perlman_syndrome	DIS3L2	missense_variant,non-coding_transcript_variant	YES	16.82
6:151380111:G:A	rs745936781	2	232263348	G	A	DIS3L2	non_coding_transcript_exon_variant	89	168	0.529762	0.6875	0.42	0.5833	0.5	Benign	Perlman_syndrome	DIS3L2	missense_variant,non-coding_transcript_variant	NO	16.82
6:151603841:A:G	.	2	232521722	G	A	CHRND	upstream_gene_variant	164	168	0.97619	0	0.06	0	0.02	Benign	not_provided	PRSS56	intron_variant	NO	0.371
6:151603841:A:G	.	2	232521722	G	A	PRSS56	intron_variant	164	168	0.97619	0	0.06	0	0.02	Benign	not_provided	PRSS56	intron_variant	YES	0.371
6:153271:C:T	rs61738868	15	23017924	G	A	TUBGCP5	synonymous_variant	4	168	0.0238095	0	0	0.1111	0	Benign	not_provided	TUBGCP5	non-coding_transcript_variant,synonymous_variant	YES	1.052
6:156347329:G:A	rs368631950	2	237350132	G	A	COL6A3	intron_variant	2	168	0.0119048	0	0	0	0.04	Benign	Collagen_6-related_myopathy	COL6A3	intron_variant	YES	0.54
6:156356167:G:A	rs59437067	2	237358944	G	A	COL6A3	intron_variant	18	168	0.107143	0.0313	0.12	0.0278	0.2	Benign	not_provided	COL6A3	intron_variant	YES	0.145
6:156909273:G:A	rs61752232	2	237911738	G	A	RAMP1	synonymous_variant	19	168	0.113095	0.0625	0	0.0833	0.28	Benign	not_provided	RAMP1	synonymous_variant	YES	0.076
6:158164166:C:T	.	2	239144830	T	C	HDAC4	intron_variant	162	168	0.964286	0	0	0.1667	0	Benign	not_provided	HDAC4	intron_variant	YES	0.544
6:158215015:G:A	.	2	239189860	G	A	HDAC4	synonymous_variant	4	168	0.0238095	0	0.04	0	0.04	Benign	not_provided	HDAC4	synonymous_variant	YES	3.512
6:158980601:C:T	rs4077388	2	239961378	C	T	NDUFA10	intron_variant	1	156	0.00641026	0	0	0	0.0208	Benign	not_provided	NDUFA10	intron_variant	YES	0.771
6:159766169:A:G	.	2	240721775	G	A	KIF1A	intron_variant	152	168	0.904762	0.1875	0.02	0.0833	0.12	Benign	not_provided	KIF1A	intron_variant	YES	0.938
6:160122945:A:G	rs75497441	2	241064938	G	A	SNED1	synonymous_variant	41	168	0.244048	0.5625	0.86	0.7222	0.8	Benign	not_provided	SNED1	synonymous_variant	YES	1.845
6:162868:C:T	.	15	23008424	G	A	TUBGCP5	intron_variant	2	168	0.0119048	0	0	0	0.04	Benign	not_provided	TUBGCP5	intron_variant	YES	0.468
6:16348529:A:G	.	15	88847402	G	A	ACAN	missense_variant	88	168	0.52381	0.5938	0.4	0.3333	0.58	Benign	not_provided	ACAN	missense_variant	YES	0.065
6:17265902:G:A	rs186780547	15	89805961	G	A	ANPEP	intron_variant	14	168	0.0833333	0.125	0.04	0.1111	0.08	Benign	not_provided	ANPEP	intron_variant	YES	1.019
6:17784609:A:G	.	15	90948804	C	T	UNC45A	intron_variant	82	168	0.488095	0.7813	0.28	0.5	0.58	Benign	not_provided	UNC45A	intron_variant	YES	0.328
6:20295133:A:G	rs12591124	15	93000726	G	A	CHD2	intron_variant	92	168	0.547619	0.4688	0.56	0.25	0.48	Benign	not_provided	CHD2	intron_variant	YES	0.732
6:20304305:T:C	rs34315566	15	93009258	C	T	CHD2	synonymous_variant	21	168	0.125	0.9688	0.82	0.8889	0.86	Benign	Developmental_and_epileptic_encephalopathy_94|Inborn_genetic_diseases|not_specified|not_provided	CHD2	synonymous_variant	YES	0.293
6:20307879:A:G	rs2119010	15	93012487	A	G	CHD2	intron_variant	33	168	0.196429	0.1563	0.08	0.4444	0.16	Benign	Developmental_and_epileptic_encephalopathy_94|not_provided	CHD2	intron_variant	YES	0.046
6:23457485:G:A	.	15	83889924	A	G	ADAMTSL3	intron_variant	61	168	0.363095	0.625	0.72	0.5278	0.64	Benign	not_provided	ADAMTSL3	intron_variant	YES	1.313
6:23457485:G:A	.	15	83889924	A	G	ADAMTSL3	intron_variant&non_coding_transcript_variant	61	168	0.363095	0.625	0.72	0.5278	0.64	Benign	not_provided	ADAMTSL3	intron_variant	NO	1.313
6:259185:C:T	rs74003075	15	22903786	G	A	CYFIP1	synonymous_variant	27	168	0.160714	0.2813	0.06	0.3333	0.06	Benign	not_provided	CYFIP1	synonymous_variant	YES	0.021
6:33830104:A:G	.	2	128317768	C	T	HS6ST1	intron_variant	112	168	0.666667	0.5313	0.3	0.25	0.3	Benign	not_provided	HS6ST1	intron_variant	YES	2.705
6:33830104:A:G	.	2	128317768	C	T	LOC108592338	intron_variant&non_coding_transcript_variant	112	168	0.666667	0.5313	0.3	0.25	0.3	Benign	not_provided	HS6ST1	intron_variant	NO	2.705
6:33830104:A:G	.	2	128317768	C	T	LOC108592338	non_coding_transcript_exon_variant	112	168	0.666667	0.5313	0.3	0.25	0.3	Benign	not_provided	HS6ST1	intron_variant	NO	2.705
6:34935920:T:C	.	2	127292424	A	G	ERCC3	intron_variant	70	168	0.416667	0.2813	0.5	0.5	0.36	Benign	not_provided	ERCC3	intron_variant	YES	3.571
6:34935920:T:C	.	2	127292424	A	G	ERCC3	intron_variant&non_coding_transcript_variant	70	168	0.416667	0.2813	0.5	0.5	0.36	Benign	not_provided	ERCC3	intron_variant	NO	3.571
6:34935920:T:C	.	2	127292424	A	G	LOC118154861	downstream_gene_variant	70	168	0.416667	0.2813	0.5	0.5	0.36	Benign	not_provided	ERCC3	intron_variant	NO	3.571
6:46787250:G:A	rs192184441	2	179970702	T	C	CWC22	synonymous_variant	125	168	0.744048	0.25	0.28	0.3889	0.14	Benign	not_provided	CWC22	synonymous_variant	YES	5.772
6:52646029:C:T	.	2	174567841	G	A	LOC118154555	intron_variant&non_coding_transcript_variant	2	168	0.0119048	0	0.04	0	0	Benign	Wiskott-Aldrich_syndrome_2	WIPF1	intron_variant	NO	1.683
6:52646029:C:T	.	2	174567841	G	A	LOC118154971	upstream_gene_variant	2	168	0.0119048	0	0.04	0	0	Benign	Wiskott-Aldrich_syndrome_2	WIPF1	intron_variant	NO	1.683
6:52646029:C:T	.	2	174567841	G	A	WIPF1	intron_variant	2	168	0.0119048	0	0.04	0	0	Benign	Wiskott-Aldrich_syndrome_2	WIPF1	intron_variant	YES	1.683
6:54002953:C:T	.	2	173229772	G	A	MAP3K20	intron_variant	1	168	0.00595238	0	0.02	0	0	Benign	Split-foot_malformation-mesoaxial_polydactyly_syndrome|Myopathy,_centronuclear,_6,_with_fiber-type_disproportion|not_provided	MAP3K20	intron_variant	YES	13.74
6:5654716:C:T	rs111870710	15	29054502	C	T	APBA2	synonymous_variant	11	168	0.0654762	0.0625	0.06	0.0833	0.06	Benign	not_provided	APBA2	synonymous_variant	YES	0.189
6:58298805:C:T	rs568098536	2	169031294	A	G	ABCB11	5_prime_UTR_variant	164	168	0.97619	0.0313	0.06	0	0	Benign	Progressive_familial_intrahepatic_cholestasis_type_2	ABCB11	5_prime_UTR_variant	YES	5.953
6:58298805:C:T	rs568098536	2	169031294	A	G	ABCB11	intron_variant	164	168	0.97619	0.0313	0.06	0	0	Benign	Progressive_familial_intrahepatic_cholestasis_type_2	ABCB11	5_prime_UTR_variant	NO	5.953
6:58298805:C:T	rs568098536	2	169031294	A	G	ABCB11	synonymous_variant	164	168	0.97619	0.0313	0.06	0	0	Benign	Progressive_familial_intrahepatic_cholestasis_type_2	ABCB11	5_prime_UTR_variant	NO	5.953
6:637385:G:A	.	15	28028204	T	C	OCA2	intron_variant	158	168	0.940476	0.1875	0.04	0	0.04	Benign	not_provided	OCA2	intron_variant	YES	3.1
6:637385:G:A	.	15	28028204	T	C	OCA2	intron_variant&non_coding_transcript_variant	158	168	0.940476	0.1875	0.04	0	0.04	Benign	not_provided	OCA2	intron_variant	NO	3.1
6:69922108:C:T	rs12997	2	157736845	A	G	ACVR1	3_prime_UTR_variant	117	168	0.696429	0.25	0.36	0.1667	0.38	Benign	Progressive_myositis_ossificans	ACVR1	3_prime_UTR_variant	YES	0.122
6:7246205:T:C	.	15	101051718	A	G	LRRK1	synonymous_variant	19	168	0.113095	0.25	0.1	0.1111	0.04	Benign	not_provided	LRRK1	synonymous_variant	YES	0.055
6:7391201:A:G	.	15	100900978	C	T	ALDH1A3	intron_variant	150	168	0.892857	0.0313	0.2	0.0278	0.12	Benign	not_provided	ALDH1A3	intron_variant	YES	0.158
6:7713525:G:A	.	15	100568921	T	C	LINS1	downstream_gene_variant	166	168	0.988095	0	0.04	0	0	Benign	not_provided	LINS1	non-coding_transcript_variant,3_prime_UTR_variant	NO	2.379
6:79099998:G:A	.	2	148998651	C	T	KIF5C	intron_variant	8	168	0.047619	0.0938	0.06	0	0.04	Benign	not_provided	KIF5C	intron_variant	YES	2.736
6:79319913:C:T	rs41269815	2	148781756	G	A	EPC2	synonymous_variant	1	168	0.00595238	0.0313	0	0	0	Benign	not_provided	EPC2	synonymous_variant	YES	5.946
6:8055061:G:C	.	15	100152577	C	G	ADAMTS17	intron_variant	5	168	0.0297619	0.0625	0.04	0	0.02	Benign	not_provided	ADAMTS17	intron_variant	YES	2.298
6:8055061:G:C	.	15	100152577	C	G	ADAMTS17	intron_variant&non_coding_transcript_variant	5	168	0.0297619	0.0625	0.04	0	0.02	Benign	not_provided	ADAMTS17	intron_variant	NO	2.298
6:8143061:A:G	.	15	100049274	C	T	ADAMTS17	intron_variant	83	168	0.494048	0.3125	0.4	0.8611	0.48	Benign	not_provided	ADAMTS17	intron_variant	YES	0.705
6:8143061:A:G	.	15	100049274	C	T	ADAMTS17	intron_variant&non_coding_transcript_variant	83	168	0.494048	0.3125	0.4	0.8611	0.48	Benign	not_provided	ADAMTS17	intron_variant	NO	0.705
6:92088023:A:T	.	2	136115979	A	T	CXCR4	intron_variant	162	168	0.964286	0.0625	0.04	0.0278	0.02	Benign	not_provided	CXCR4	5_prime_UTR_variant,intron_variant	YES	0.394
6:92088023:A:T	.	2	136115979	A	T	LOC118154607	3_prime_UTR_variant	162	168	0.964286	0.0625	0.04	0.0278	0.02	Benign	not_provided	CXCR4	5_prime_UTR_variant,intron_variant	NO	0.394
6:93132232:G:C	rs77535003	2	135168635	C	G	LOC103793819	downstream_gene_variant	2	168	0.0119048	0	0.04	0	0	Benign	Warburg_micro_syndrome_1|not_provided	RAB3GAP1	missense_variant	NO	19.03
6:93132232:G:C	rs77535003	2	135168635	C	G	LOC118154609	upstream_gene_variant	2	168	0.0119048	0	0.04	0	0	Benign	Warburg_micro_syndrome_1|not_provided	RAB3GAP1	missense_variant	NO	19.03
6:93132232:G:C	rs77535003	2	135168635	C	G	RAB3GAP1	missense_variant	2	168	0.0119048	0	0.04	0	0	Benign	Warburg_micro_syndrome_1|not_provided	RAB3GAP1	missense_variant	YES	19.03
6:95502256:C:T	rs369376292	2	132790047	G	A	NCKAP5	synonymous_variant	2	168	0.0119048	0.0625	0	0	0	Benign	not_provided	NCKAP5	synonymous_variant	YES	4.684
7:125621946:G:A	rs3795832	1	89584056	G	A	LRRC8B	missense_variant	67	168	0.39881	0.4063	0.4	0.4444	0.36	Benign	not_provided	LRRC8B	missense_variant	YES	6.609
7:130495521:G:A	rs1801555	1	94001103	A	G	ABCA4	splice_region_variant&synonymous_variant	166	168	0.988095	0.0313	0	0.0278	0	Benign	Macular_degeneration|not_specified|ABCA4-Related_Disorders|Cone-Rod_Dystrophy,_Recessive|Stargardt_Disease,_Recessive|Retinitis_Pigmentosa,_Recessive|not_provided	ABCA4	synonymous_variant	NO	1.293
7:141611877:C:T	.	1	102914572	G	A	COL11A1	intron_variant	58	168	0.345238	0.4375	0.28	0.4444	0.28	Benign	not_provided	COL11A1	intron_variant	YES	0.971
7:145474407:T:C	.	1	108939681	C	T	CLCC1	non_coding_transcript_exon_variant	167	168	0.994048	0.0313	0	0	0	Benign	not_provided	CLCC1	non-coding_transcript_variant,synonymous_variant	NO	0.921
7:145474407:T:C	.	1	108939681	C	T	CLCC1	synonymous_variant	167	168	0.994048	0.0313	0	0	0	Benign	not_provided	CLCC1	non-coding_transcript_variant,synonymous_variant	YES	0.921
7:145788693:A:G	.	1	109252269	G	A	CELSR2	synonymous_variant	131	168	0.779762	0.3438	0.3	0.1667	0.1	Benign	not_provided	CELSR2	synonymous_variant	YES	0.325
7:147930989:G:A	rs114510939	1	111318516	G	A	LOC103794626	synonymous_variant	16	168	0.0952381	0.1875	0.02	0.1944	0.04	Benign	not_provided	CHIA	synonymous_variant	NO	1.322
7:148387173:C:T	rs535317	1	111778178	C	T	KCND3	intron_variant	98	168	0.583333	0.7188	0.64	0.5556	0.46	Benign	not_provided	KCND3	intron_variant	YES	1.166
7:15124526:A:G	.	10	15616597	G	A	ITGA8	intron_variant	164	168	0.97619	0.0938	0.02	0	0	Benign	not_provided	ITGA8	intron_variant	YES	2.294
7:151290795:C:T	rs80266556	1	114675928	C	T	AMPD1	synonymous_variant	21	168	0.125	0.125	0.16	0	0.18	Benign	Muscle_AMP_deaminase_deficiency|not_specified	AMPD1	synonymous_variant	YES	8.859
7:151358589:G:A	rs145440875	1	114736778	A	G	CSDE1	synonymous_variant	167	168	0.994048	0	0	0.0278	0	Benign	not_provided	CSDE1	synonymous_variant	YES	10.79
7:153046440:C:T	.	1	116403983	T	C	ATP1A1	splice_region_variant&intron_variant	167	168	0.994048	0	0	0	0.02	Benign	Hypomagnesemia,_seizures,_and_intellectual_disability_2|Charcot-marie-tooth_disease,_axonal,_type_2DD|not_provided	ATP1A1	intron_variant	NO	0.299
7:153046470:C:T	.	1	116404013	T	C	ATP1A1	intron_variant	167	168	0.994048	0	0	0	0.02	Benign	Hypomagnesemia,_seizures,_and_intellectual_disability_2|Charcot-marie-tooth_disease,_axonal,_type_2DD|not_provided	ATP1A1	intron_variant	YES	0.012
7:156633058:G:A	.	1	119741914	C	T	PHGDH	intron_variant	62	168	0.369048	0.375	0.32	0.5	0.32	Benign	PHGDH_deficiency	PHGDH	intron_variant	YES	0.016
7:16350493:G:A	.	10	16870105	G	A	CUBN	intron_variant	82	168	0.488095	0.4688	0.48	0.5278	0.48	Benign	not_provided	CUBN	intron_variant	YES	1.393
7:16369805:T:C	rs150488625	10	16890455	C	T	CUBN	missense_variant	141	168	0.839286	0.2188	0.22	0.1389	0.08	Benign	Imerslund-Grasbeck_syndrome|Imerslund-Grasbeck_syndrome_type_1|not_provided	CUBN	missense_variant	YES	0.829
7:16401939:A:C	.	10	16928524	A	C	CUBN	intron_variant	1	168	0.00595238	0	0	0	0.02	Benign	not_provided	CUBN	intron_variant	YES	0.224
7:18016092:G:T	rs4747352	10	18539734	G	T	CACNB2	3_prime_UTR_variant	141	168	0.839286	0.875	0.92	0.7778	0.78	Benign	Brugada_syndrome_4|not_specified|not_provided	CACNB2	3_prime_UTR_variant	YES	2.43
7:25691614:C:T	.	10	27093045	C	T	LOC100412730	intron_variant	93	168	0.553571	0.2813	0.52	0.5833	0.74	Benign	not_provided	ANKRD26	intron_variant	NO	0.335
7:25691614:C:T	.	10	27093045	C	T	LOC118143367	upstream_gene_variant	93	168	0.553571	0.2813	0.52	0.5833	0.74	Benign	not_provided	ANKRD26	intron_variant	NO	0.335
7:26056822:C:T	rs2448107	10	26705721	A	G	PDSS1	intron_variant	165	168	0.982143	0.0938	0	0	0	Benign	not_provided	PDSS1	intron_variant	YES	4.271
7:28994068:G:A	.	10	30340436	G	A	MTPAP	synonymous_variant	13	168	0.077381	0.125	0.08	0.0833	0.04	Benign	not_specified	MTPAP	synonymous_variant	YES	0.967
7:29002335:A:G	rs11815219	10	30349379	G	A	MTPAP	intron_variant	152	168	0.904762	0.2188	0.08	0.0833	0.04	Benign	not_provided	MTPAP		NO	8.578
7:29002335:A:G	rs11815219	10	30349379	G	A	MTPAP	upstream_gene_variant	152	168	0.904762	0.2188	0.08	0.0833	0.04	Benign	not_provided	MTPAP		NO	8.578
7:37777323:C:T	.	1	942951	C	T	NOC2L	downstream_gene_variant	1	168	0.00595238	0.0313	0	0	0	Benign	not_provided	SAMD11	missense_variant	NO	8.385
7:37777323:C:T	.	1	942951	C	T	SAMD11	missense_variant	1	168	0.00595238	0.0313	0	0	0	Benign	not_provided	SAMD11	missense_variant	YES	8.385
7:38135936:C:T	.	1	1336467	C	T	DVL1	3_prime_UTR_variant	3	168	0.0178571	0	0.06	0	0	Benign	not_provided	DVL1	missense_variant	NO	23.3
7:38135936:C:T	.	1	1336467	C	T	DVL1	missense_variant	3	168	0.0178571	0	0.06	0	0	Benign	not_provided	DVL1	missense_variant	YES	23.3
7:38135936:C:T	.	1	1336467	C	T	TAS1R3	downstream_gene_variant	3	168	0.0178571	0	0.06	0	0	Benign	not_provided	DVL1	missense_variant	NO	23.3
7:39061693:C:T	.	1	2409065	C	T	PEX10	intron_variant	6	168	0.0357143	0	0.12	0	0	Benign	not_provided	PEX10	intron_variant	YES	0.039
7:39061693:C:T	.	1	2409065	C	T	RER1	downstream_gene_variant	6	168	0.0357143	0	0.12	0	0	Benign	not_provided	PEX10	intron_variant	NO	0.039
7:39914514:G:A	rs41301967	1	3425564	G	A	PRDM16	intron_variant	1	168	0.00595238	0.0313	0	0	0	Benign	Left_ventricular_noncompaction_8|not_specified|not_provided	PRDM16	intron_variant	YES	0.177
7:40011310:C:T	rs12090611	1	3515461	C	T	MEGF6	missense_variant	4	168	0.0238095	0.0313	0.04	0	0.02	Benign	not_provided	MEGF6	missense_variant	YES	15.72
7:40075821:G:A	rs115018369	1	3579853	G	A	MEGF6	synonymous_variant	4	168	0.0238095	0.0313	0.04	0	0.02	Benign	not_provided	MEGF6	synonymous_variant	YES	0.294
7:42358129:T:C	.	1	5864679	C	T	NPHP4	intron_variant	78	168	0.464286	0.75	0.48	0.7222	0.32	Benign	not_provided	NPHP4	intron_variant	YES	0.23
7:42358129:T:C	.	1	5864679	C	T	NPHP4	intron_variant&non_coding_transcript_variant	78	168	0.464286	0.75	0.48	0.7222	0.32	Benign	not_provided	NPHP4	intron_variant	NO	0.23
7:42369144:G:A	rs868163	1	5874430	A	G	NPHP4	intron_variant	90	168	0.535714	0.25	0.52	0.2778	0.68	Benign	Nephronophthisis_4|not_specified|not_provided	NPHP4	intron_variant	YES	0.025
7:42369144:G:A	rs868163	1	5874430	A	G	NPHP4	intron_variant&non_coding_transcript_variant	90	168	0.535714	0.25	0.52	0.2778	0.68	Benign	Nephronophthisis_4|not_specified|not_provided	NPHP4	intron_variant	NO	0.025
7:43747381:G:A	rs184689680	1	7249551	G	A	CAMTA1	missense_variant	1	168	0.00595238	0.0313	0	0	0	Benign	not_provided	CAMTA1	synonymous_variant	NO	7.575
7:43747381:G:A	rs184689680	1	7249551	G	A	CAMTA1	synonymous_variant	1	168	0.00595238	0.0313	0	0	0	Benign	not_provided	CAMTA1	synonymous_variant	YES	7.575
7:44823624:A:C	.	1	8358584	C	A	RERE	synonymous_variant	161	168	0.958333	0.1563	0.04	0	0	Benign	Neurodevelopmental_disorder_with_or_without_anomalies_of_the_brain,_eye,_or_heart|not_provided	RERE	synonymous_variant	YES	0.012
7:45119791:C:T	rs145173617	1	8656082	C	T	RERE	synonymous_variant	2	168	0.0119048	0	0.04	0	0	Benign	not_provided	RERE	synonymous_variant	YES	0.529
7:48279697:G:A	rs141769179	1	11795259	G	A	MTHFR	synonymous_variant	24	168	0.142857	0.0625	0.02	0.2778	0.22	Benign	Homocystinuria_due_to_methylene_tetrahydrofolate_reductase_deficiency|Homocystinuria_due_to_MTHFR_deficiency|not_provided	MTHFR	synonymous_variant	YES	4.181
7:48333716:G:A	.	1	11845924	A	G	CLCN6	downstream_gene_variant	164	168	0.97619	0	0.04	0	0.04	Benign	not_provided	NPPA	3_prime_UTR_variant	NO	0.588
7:48333716:G:A	.	1	11845924	A	G	NPPA	3_prime_UTR_variant	164	168	0.97619	0	0.04	0	0.04	Benign	not_provided	NPPA	3_prime_UTR_variant	YES	0.588
7:51959118:G:A	.	1	16028469	G	A	LOC100409736	intron_variant	56	168	0.333333	0.3125	0.3	0.25	0.44	Benign	not_provided	CLCNKA	intron_variant	NO	1.169
7:51963099:A:G	.	1	16032557	A	G	LOC100400180	upstream_gene_variant	56	168	0.333333	0.3125	0.3	0.25	0.44	Benign	Bartter_disease_type_4B|not_provided	CLCNKA	intron_variant	NO	7.63
7:51963099:A:G	.	1	16032557	A	G	LOC100409736	intron_variant	56	168	0.333333	0.3125	0.3	0.25	0.44	Benign	Bartter_disease_type_4B|not_provided	CLCNKA	intron_variant	NO	7.63
7:51980015:G:A	.	1	16056542	A	G	FAM131C	downstream_gene_variant	112	168	0.666667	0.3125	0.3	0.25	0.44	Benign	not_provided	CLCNKB	intron_variant	NO	5.375
7:51980015:G:A	.	1	16056542	A	G	LOC100400180	downstream_gene_variant	112	168	0.666667	0.3125	0.3	0.25	0.44	Benign	not_provided	CLCNKB	intron_variant	NO	5.375
7:51980015:G:A	.	1	16056542	A	G	LOC100400180	intron_variant	112	168	0.666667	0.3125	0.3	0.25	0.44	Benign	not_provided	CLCNKB	intron_variant	NO	5.375
7:52042758:C:A	rs146367469	1	16124547	C	A	EPHA2	3_prime_UTR_variant	1	168	0.00595238	0	0	0.0278	0	Benign	Cataract_6_multiple_types	EPHA2	3_prime_UTR_variant	YES	2.817
7:52042758:C:A	rs146367469	1	16124547	C	A	EPHA2	downstream_gene_variant	1	168	0.00595238	0	0	0.0278	0	Benign	Cataract_6_multiple_types	EPHA2	3_prime_UTR_variant	NO	2.817
7:52053494:G:A	.	1	16134201	G	A	EPHA2	intron_variant	57	168	0.339286	0.3125	0.3	0.2778	0.44	Benign	not_provided	EPHA2	intron_variant	YES	0.234
7:52055362:T:C	rs55700006	1	16135769	C	T	EPHA2	splice_region_variant&synonymous_variant	13	168	0.077381	1	0.88	0.9722	0.88	Benign	Cataract_6_multiple_types|not_specified	EPHA2	synonymous_variant	NO	9.814
7:54747168:G:A	rs140940082	1	19231418	G	A	EMC1	missense_variant	61	168	0.363095	0.625	0.38	0.25	0.26	Benign	not_provided	EMC1	missense_variant	YES	23.4
7:56118875:C:T	.	1	20661163	C	T	DDOST	intron_variant	43	168	0.255952	0.2188	0.26	0.2778	0.26	Benign	not_provided	DDOST	intron_variant	YES	7.588
7:56118875:C:T	.	1	20661163	C	T	KIF17	downstream_gene_variant	43	168	0.255952	0.2188	0.26	0.2778	0.26	Benign	not_provided	DDOST	intron_variant	NO	7.588
7:56118997:C:T	rs17837938	1	20661285	C	T	DDOST	synonymous_variant	7	168	0.0416667	0.0313	0.06	0	0.06	Benign	Congenital_disorder_of_glycosylation_type_Ir|not_specified	DDOST	synonymous_variant	YES	9.178
7:56118997:C:T	rs17837938	1	20661285	C	T	KIF17	downstream_gene_variant	7	168	0.0416667	0.0313	0.06	0	0.06	Benign	Congenital_disorder_of_glycosylation_type_Ir|not_specified	DDOST	synonymous_variant	NO	9.178
7:56958733:A:G	rs3200255	1	21573678	A	G	ALPL	intron_variant	106	168	0.630952	0.5625	0.7	0.7778	0.5	Benign	Infantile_hypophosphatasia|Hypophosphatasia|Childhood_hypophosphatasia|Adult_hypophosphatasia|not_specified|not_provided	ALPL	synonymous_variant	NO	0.637
7:56958733:A:G	rs3200255	1	21573678	A	G	ALPL	synonymous_variant	106	168	0.630952	0.5625	0.7	0.7778	0.5	Benign	Infantile_hypophosphatasia|Hypophosphatasia|Childhood_hypophosphatasia|Adult_hypophosphatasia|not_specified|not_provided	ALPL	synonymous_variant	YES	0.637
7:57236363:T:C	rs34443576	1	21852958	C	T	HSPG2	synonymous_variant	163	168	0.970238	0	0.1	0	0	Benign	Connective_tissue_disorder|Lethal_Kniest-like_syndrome|Schwartz-Jampel_syndrome|not_provided	HSPG2	synonymous_variant	YES	1.039
7:6447201:A:G	.	10	6021711	T	C	IL2RA	intron_variant	28	168	0.166667	0.2188	0.16	0.25	0.08	Benign	Immunodeficiency_due_to_CD25_deficiency	IL2RA	intron_variant	YES	0.062
7:66818290:C:T	rs77293616	1	31619542	C	T	HCRTR1	synonymous_variant	1	168	0.00595238	0	0	0.0278	0	Benign	not_provided	HCRTR1	synonymous_variant	YES	1.62
7:67471125:G:A	rs145088108	1	32274765	G	A	LCK	missense_variant	1	168	0.00595238	0.0313	0	0	0	Benign	Severe_combined_immunodeficiency_due_to_LCK_deficiency|not_provided	LCK	missense_variant	YES	22.1
7:7354029:C:T	.	10	4841884	A	G	AKR1E2	intron_variant	166	168	0.988095	0.0313	0	0	0.02	Benign	not_provided	AKR1E2	intron_variant	YES	0.079
7:78125147:G:A	rs372092107	1	42928947	G	A	SLC2A1	synonymous_variant	5	168	0.0297619	0.125	0.02	0	0	Benign	GLUT1_deficiency_syndrome_1,_autosomal_recessive|not_specified	SLC2A1	synonymous_variant	YES	4.387
7:80098375:C:T	.	1	44826811	C	T	PTCH2	intron_variant	67	168	0.39881	0.4688	0.28	0.1667	0.64	Benign	not_provided	PTCH2	intron_variant	YES	3.439
7:8937768:T:C	rs370041089	10	3149668	G	A	PITRM1	synonymous_variant	157	168	0.934524	0.0938	0.02	0	0.14	Benign	not_provided	PITRM1	non-coding_transcript_variant,synonymous_variant	YES	0.171
7:8946479:C:T	rs548760819	10	3140749	G	A	PFKP	downstream_gene_variant	10	168	0.0595238	0.0938	0.02	0	0.12	Benign	not_provided	PITRM1	non-coding_transcript_variant,synonymous_variant	NO	0.05
7:8946479:C:T	rs548760819	10	3140749	G	A	PITRM1	synonymous_variant	10	168	0.0595238	0.0938	0.02	0	0.12	Benign	not_provided	PITRM1	non-coding_transcript_variant,synonymous_variant	YES	0.05
7:8949996:T:C	.	10	3137566	G	A	PFKP	downstream_gene_variant	158	168	0.940476	0.0938	0.02	0	0.12	Benign	not_provided			NO	1.4
7:8949996:T:C	.	10	3137566	G	A	PITRM1	downstream_gene_variant	158	168	0.940476	0.0938	0.02	0	0.12	Benign	not_provided			NO	1.4
7:90338550:C:T	rs78753605	1	54607957	C	T	ACOT11	synonymous_variant	17	124	0.137097	0	0.1944	0	0.2174	Benign	not_provided	ACOT11	synonymous_variant	YES	0.649
7:90338550:C:T	rs78753605	1	54607957	C	T	FAM151A	downstream_gene_variant	17	124	0.137097	0	0.1944	0	0.2174	Benign	not_provided	ACOT11	synonymous_variant	NO	0.649
7:92713007:G:A	rs200048299	1	57069402	G	A	DAB1	intron_variant	12	168	0.0714286	0.0938	0.04	0.0556	0.1	Benign	not_provided	DAB1	synonymous_variant	NO	1.742
7:92713007:G:A	rs200048299	1	57069402	G	A	DAB1	synonymous_variant	12	168	0.0714286	0.0938	0.04	0.0556	0.1	Benign	not_provided	DAB1	synonymous_variant	YES	1.742
7:98302209:T:C	rs61743961	1	62648297	T	C	DOCK7	missense_variant	10	168	0.0595238	0.1563	0.04	0.0833	0	Benign	Developmental_and_epileptic_encephalopathy,_23|not_specified|not_provided	DOCK7	missense_variant	YES	7.611
8:102205375:T:C	rs199981664	7	143397297	G	A	EPHA1	splice_region_variant&intron_variant	92	168	0.547619	0.375	0.5	0.6944	0.28	Benign	not_provided	EPHA1	intron_variant	NO	1.14
8:106548415:A:G	rs145725555	7	138871280	C	T	KIAA1549	synonymous_variant	77	168	0.458333	0.6875	0.5	0.5278	0.5	Benign	not_provided	KIAA1549	synonymous_variant	YES	0.412
8:106550139:C:T	rs28523576	7	138869597	G	A	KIAA1549	synonymous_variant	2	168	0.0119048	0	0	0.0556	0	Benign	not_specified|not_provided	KIAA1549	synonymous_variant	YES	6.497
8:113787658:T:C	.	7	131506850	A	G	PODXL	intron_variant	13	168	0.077381	0	0.02	0.1111	0.16	Benign	not_provided	PODXL	intron_variant	YES	3.669
8:11455310:T:C	.	7	44242658	C	T	CAMK2B	splice_region_variant&intron_variant	165	168	0.982143	0.0625	0	0	0.02	Benign	not_provided	CAMK2B	intron_variant	NO	0.277
8:114921540:G:A	rs1990790	7	130393789	C	T	CEP41	downstream_gene_variant	10	168	0.0595238	0	0.12	0.0833	0.02	Benign	Joubert_syndrome_15	CEP41	non-coding_transcript_variant,3_prime_UTR_variant	NO	0.059
8:117826253:C:T	rs769200	7	127242848	G	A	GRM8	non_coding_transcript_exon_variant	17	168	0.10119	0.125	0.08	0	0.18	Benign	not_provided	GRM8	non-coding_transcript_variant,synonymous_variant,intron_variant	NO	4.268
8:117826253:C:T	rs769200	7	127242848	G	A	GRM8	synonymous_variant	17	168	0.10119	0.125	0.08	0	0.18	Benign	not_provided	GRM8	non-coding_transcript_variant,synonymous_variant,intron_variant	YES	4.268
8:12274943:C:T	.	7	45076174	T	C	CCM2	3_prime_UTR_variant	167	168	0.994048	0.0313	0	0	0	Benign	not_provided	CCM2	non-coding_transcript_variant,3_prime_UTR_variant	YES	1.15
8:12274943:C:T	.	7	45076174	T	C	NACAD	downstream_gene_variant	167	168	0.994048	0.0313	0	0	0	Benign	not_provided	CCM2	non-coding_transcript_variant,3_prime_UTR_variant	NO	1.15
8:122825350:G:A	.	7	122304473	T	C	FEZF1	5_prime_UTR_variant	166	168	0.988095	0	0.02	0	0.02	Benign	not_provided	FEZF1-AS1	5_prime_UTR_variant	NO	8.457
8:14515154:G:A	.	7	47837189	A	G	PKD1L1	intron_variant	161	168	0.958333	0	0	0.1944	0	Benign	not_provided	PKD1L1	intron_variant	YES	1.944
8:14574310:C:T	.	7	47902117	C	T	PKD1L1	intron_variant	1	168	0.00595238	0	0	0.0278	0	Benign	not_provided	PKD1L1	intron_variant	YES	0.01
8:14600345:A:G	rs75505495	7	47929331	A	G	PKD1L1	synonymous_variant	10	168	0.0595238	0.0625	0.06	0	0.1	Benign	not_provided	PKD1L1	synonymous_variant	YES	0.23
8:16853389:A:G	.	7	50376342	G	A	IKZF1	intron_variant	165	168	0.982143	0.0625	0	0	0.02	Benign	not_provided	IKZF1	intron_variant	YES	0.159
8:17015717:G:A	.	7	50544387	G	A	DDC	intron_variant	85	168	0.505952	0.4063	0.62	0.5	0.46	Benign	not_provided	DDC	intron_variant	YES	0.083
8:21781550:G:A	.	7	55192593	G	A	EGFR	intron_variant	14	168	0.0833333	0.25	0.08	0.0278	0.02	Benign	not_provided	EGFR	intron_variant	YES	1.957
8:21787686:T:C	.	7	55199064	C	T	EGFR	intron_variant	114	168	0.678571	0.2813	0.32	0.2778	0.38	Benign	not_provided	EGFR	intron_variant	YES	3.93
8:25400517:G:A	.	7	30968992	C	T	GHRHR	intron_variant	7	168	0.0416667	0.1563	0.02	0	0.02	Benign	not_provided	GHRHR	intron_variant	YES	2.296
8:25616985:G:A	rs116690173	7	30753915	C	T	INMT	synonymous_variant	13	168	0.077381	0.0625	0.08	0.0833	0.08	Benign	not_provided	INMT	non-coding_transcript_variant,synonymous_variant	YES	2.727
8:34401131:C:T	.	7	21854093	G	A	DNAH11	intron_variant	70	168	0.416667	0.0625	0.5	0.3333	0.62	Benign	not_provided	DNAH11	intron_variant	YES	0.125
8:4303586:T:G	.	7	36443743	T	G	ANLN	intron_variant	2	168	0.0119048	0.0313	0.02	0	0	Benign	not_provided	ANLN	intron_variant	YES	24.3
8:64990692:A:C	rs143520608	7	82956284	G	T	PCLO	non_coding_transcript_exon_variant	70	168	0.416667	0.9688	0.46	0.75	0.34	Benign	not_provided	PCLO	synonymous_variant	NO	6.685
8:64990692:A:C	rs143520608	7	82956284	G	T	PCLO	synonymous_variant	70	168	0.416667	0.9688	0.46	0.75	0.34	Benign	not_provided	PCLO	synonymous_variant	YES	6.685
8:71853668:G:A	.	7	103489956	A	G	RELN	intron_variant	163	168	0.970238	0.1563	0	0	0	Benign	not_provided	RELN	intron_variant	YES	0.049
8:7542529:A:G	.	7	40095079	A	G	CDK13	3_prime_UTR_variant	1	168	0.00595238	0	0	0.0278	0	Benign	not_provided	CDK13	3_prime_UTR_variant	YES	14.13
8:7702484:A:G	rs4637704	7	40274644	A	G	SUGCT	intron_variant	8	168	0.047619	0.0938	0.04	0.0556	0.02	Benign	not_provided	SUGCT	synonymous_variant,intron_variant	YES	7.153
8:7702484:A:G	rs4637704	7	40274644	A	G	SUGCT	synonymous_variant	8	168	0.047619	0.0938	0.04	0.0556	0.02	Benign	not_provided	SUGCT	synonymous_variant,intron_variant	YES	7.153
8:83282681:A:T	rs554154151	7	114663436	A	T	FOXP2	intron_variant	15	168	0.0892857	0.0313	0.14	0	0.14	Benign	Childhood_apraxia_of_speech	FOXP2	intron_variant	YES	0.06
8:9338208:G:A	.	7	41966657	G	A	GLI3	intron_variant	1	168	0.00595238	0	0	0.0278	0	Benign	Pallister-Hall_syndrome|Greig_cephalopolysyndactyly_syndrome	GLI3	intron_variant	YES	4.38
8:9339282:C:T	rs4724083	7	41967473	C	T	GLI3	intron_variant	2	168	0.0119048	0	0.02	0.0278	0	Benign	not_provided	GLI3	intron_variant	YES	0.025
8:9420658:A:G	rs748769754	7	42045427	G	A	GLI3	synonymous_variant	31	168	0.184524	1	0.8	0.9444	0.62	Benign	Polydactyly|Pallister-Hall_syndrome|Greig_cephalopolysyndactyly_syndrome	GLI3	synonymous_variant	YES	0.199
8:9420658:A:G	rs748769754	7	42045427	G	A	GLI3	upstream_gene_variant	31	168	0.184524	1	0.8	0.9444	0.62	Benign	Polydactyly|Pallister-Hall_syndrome|Greig_cephalopolysyndactyly_syndrome	GLI3	synonymous_variant	NO	0.199
8:96994058:G:A	rs201135441	7	148816730	C	T	EZH2	missense_variant	1	168	0.00595238	0	0	0	0.02	Benign	Weaver_syndrome|not_specified	EZH2	missense_variant	YES	16.15
8:97583175:T:C	.	7	148266924	A	G	CNTNAP2	intron_variant	3	168	0.0178571	0.0938	0	0	0	Benign	not_provided	CNTNAP2	intron_variant	YES	0.085
8:98450381:C:T	rs34592169	7	147395769	G	A	CNTNAP2	synonymous_variant	2	168	0.0119048	0.0625	0	0	0	Benign	Cortical_dysplasia-focal_epilepsy_syndrome|Pitt-Hopkins-like_syndrome|Inborn_genetic_diseases|not_specified|not_provided	CNTNAP2	synonymous_variant	YES	8.3
9:101802944:G:A	rs17031025	12	101120541	G	A	ANO4	synonymous_variant	9	168	0.0535714	0	0.02	0	0.16	Benign	not_provided	ANO4	synonymous_variant	YES	2.631
9:102324581:C:T	.	12	101670280	C	T	MYBPC1	intron_variant	97	168	0.577381	0.4375	0.54	0.6667	0.64	Benign	not_provided	MYBPC1	intron_variant	YES	0.158
9:102324581:C:T	.	12	101670280	C	T	MYBPC1	intron_variant&non_coding_transcript_variant	97	168	0.577381	0.4375	0.54	0.6667	0.64	Benign	not_provided	MYBPC1	intron_variant	NO	0.158
9:103391089:T:C	.	12	102840331	C	T	LOC103795386	intron_variant&non_coding_transcript_variant	125	168	0.744048	0.2813	0.22	0.3611	0.2	Benign	not_provided	PAH	intron_variant	NO	0.014
9:103391089:T:C	.	12	102840331	C	T	PAH	intron_variant	125	168	0.744048	0.2813	0.22	0.3611	0.2	Benign	not_provided	PAH	intron_variant	YES	0.014
9:10622171:A:G	.	12	10408358	T	C	.	intergenic_variant	47	168	0.279762	0.4375	0.14	0.25	0.34	Benign	not_provided	KLRC4	missense_variant,5_prime_UTR_variant	NO	12.59
9:110051485:A:G	rs2270375	12	109586736	A	G	MVK	intron_variant	152	168	0.904762	0.8125	0.92	0.9444	0.92	Benign	Porokeratosis_3,_disseminated_superficial_actinic_type|Hyperimmunoglobulin_D_with_periodic_fever|Mevalonic_aciduria|not_specified|not_provided	MVK	intron_variant	YES	0.049
9:110253421:C:T	rs75939154	12	109792315	C	T	TRPV4	intron_variant	1	168	0.00595238	0	0	0.0278	0	Benign	not_provided	TRPV4	intron_variant	YES	0.018
9:112679344:G:A	rs138669566	12	112167392	G	A	HECTD4	non_coding_transcript_exon_variant	41	168	0.244048	0.375	0.26	0.0833	0.26	Benign	not_provided	HECTD4	synonymous_variant	NO	0.309
9:112679344:G:A	rs138669566	12	112167392	G	A	HECTD4	synonymous_variant	41	168	0.244048	0.375	0.26	0.0833	0.26	Benign	not_provided	HECTD4	synonymous_variant	YES	0.309
9:112996644:T:C	rs113537844	12	112473120	C	T	PTPN11	intron_variant	165	168	0.982143	0	0	0.0833	0	Benign	not_provided	PTPN11	intron_variant	YES	0.614
9:117563200:G:A	rs36021180	12	116949660	A	G	FBXW8	missense_variant	151	168	0.89881	0.0938	0.12	0.1111	0.08	Benign	not_provided	FBXW8	missense_variant	YES	14.8
9:117828173:A:G	rs9658500	12	117227594	G	A	NOS1	synonymous_variant	147	168	0.875	0.1563	0.16	0.1667	0.04	Benign	not_provided	NOS1	synonymous_variant	YES	7.217
9:119098:G:A	rs141182137	12	47797021	G	A	HDAC7	synonymous_variant	3	168	0.0178571	0.0938	0	0	0	Benign	not_provided	HDAC7	non-coding_transcript_variant,synonymous_variant	YES	0.246
9:119856231:C:T	rs113181286	12	119186919	T	C	HSPB8	intron_variant	151	168	0.89881	0	0.04	0.0833	0.24	Benign	not_provided	HSPB8	intron_variant	YES	4.246
9:12064112:G:A	rs201600155	12	908534	G	A	RAD52	downstream_gene_variant	2	168	0.0119048	0.0625	0	0	0	Benign	Pseudohypoaldosteronism_type_2C|Neuropathy,_hereditary_sensory_and_autonomic,_type_2A	WNK1	synonymous_variant	NO	6.207
9:12064112:G:A	rs201600155	12	908534	G	A	WNK1	synonymous_variant	2	168	0.0119048	0.0625	0	0	0	Benign	Pseudohypoaldosteronism_type_2C|Neuropathy,_hereditary_sensory_and_autonomic,_type_2A	WNK1	synonymous_variant	YES	6.207
9:124311035:C:T	rs9919	12	123621292	T	C	DDX55	downstream_gene_variant	162	168	0.964286	0	0.06	0.0556	0.02	Benign	Vanishing_white_matter_disease	EIF2B1	3_prime_UTR_variant	NO	0.106
9:124311035:C:T	rs9919	12	123621292	T	C	EIF2B1	3_prime_UTR_variant	162	168	0.964286	0	0.06	0.0556	0.02	Benign	Vanishing_white_matter_disease	EIF2B1	3_prime_UTR_variant	YES	0.106
9:124311035:C:T	rs9919	12	123621292	T	C	EIF2B1	downstream_gene_variant	162	168	0.964286	0	0.06	0.0556	0.02	Benign	Vanishing_white_matter_disease	EIF2B1	3_prime_UTR_variant	NO	0.106
9:124311035:C:T	rs9919	12	123621292	T	C	LOC118144686	downstream_gene_variant	162	168	0.964286	0	0.06	0.0556	0.02	Benign	Vanishing_white_matter_disease	EIF2B1	3_prime_UTR_variant	NO	0.106
9:124377041:C:T	rs7302449	12	123688199	T	C	TCTN2	intron_variant	80	168	0.47619	0.2188	0.66	0.4444	0.64	Benign	Meckel_syndrome,_type_8|Joubert_syndrome_24|not_specified|not_provided	TCTN2	intron_variant	YES	0.285
9:124580761:G:A	rs142087355	12	123887288	G	A	DNAH10	synonymous_variant	39	168	0.232143	0.375	0.3	0.0833	0.18	Benign	not_provided	DNAH10	synonymous_variant	YES	7.077
9:13099937:T:C	rs758160	12	1874616	C	T	CACNA2D4	synonymous_variant	162	168	0.964286	0.1563	0	0.0278	0	Benign	Retinal_cone_dystrophy_4|not_specified|not_provided	CACNA2D4	synonymous_variant	YES	1.399
9:13792970:A:G	rs576194052	12	2566592	G	A	CACNA1C	intron_variant	120	168	0.714286	0.1875	0.46	0.2778	0.18	Benign	Long_QT_syndrome|not_specified|not_provided	CACNA1C	intron_variant	YES	0.989
9:13832606:G:A	rs201709484	12	2605803	G	A	CACNA1C	intron_variant	2	168	0.0119048	0	0.04	0	0	Benign	Long_QT_syndrome|not_specified|not_provided	CACNA1C	intron_variant	YES	0.884
9:14256430:G:A	rs113831847	12	2938229	G	A	TULP3	missense_variant	6	168	0.0357143	0.0625	0.08	0	0	Benign	not_provided	TULP3	missense_variant	YES	16.11
9:16475139:G:A	rs2109420	12	4915199	G	A	KCNA1	3_prime_UTR_variant	3	168	0.0178571	0	0	0	0.06	Benign	Hereditary_episodic_ataxia|Episodic_ataxia_type_1|not_provided	KCNA1	3_prime_UTR_variant	YES	0.147
9:17603296:A:G	.	12	6036059	A	G	VWF	intron_variant	1	168	0.00595238	0	0	0	0.02	Benign	not_provided	VWF	intron_variant	YES	0.934
9:17791570:G:A	rs11568266	12	6235335	G	A	CD9	splice_region_variant&intron_variant	5	168	0.0297619	0	0.02	0.1111	0	Benign	not_provided	CD9	intron_variant	NO	0.009
9:17890400:C:T	rs4149639	12	6332835	T	C	PLEKHG6	downstream_gene_variant	64	168	0.380952	0.6875	0.68	0.5833	0.54	Benign	not_provided	TNFRSF1A	intron_variant	NO	3.238
9:17890400:C:T	rs4149639	12	6332835	T	C	TNFRSF1A	intron_variant	64	168	0.380952	0.6875	0.68	0.5833	0.54	Benign	not_provided	TNFRSF1A	intron_variant	YES	3.238
9:17891245:T:C	.	12	6333707	C	T	TNFRSF1A	intron_variant	91	168	0.541667	0.5625	0.46	0.3611	0.46	Benign	not_provided	TNFRSF1A	intron_variant	YES	0.063
9:18702304:T:C	rs61731913	12	6557330	C	T	IFFO1	upstream_gene_variant	105	168	0.625	0.4375	0.4	0.3333	0.34	Benign	not_provided	NOP2	missense_variant,3_prime_UTR_variant	NO	0.041
9:18702304:T:C	rs61731913	12	6557330	C	T	NOP2	missense_variant	105	168	0.625	0.4375	0.4	0.3333	0.34	Benign	not_provided	NOP2	missense_variant,3_prime_UTR_variant	YES	0.041
9:32378878:T:C	rs75970534	12	40908622	A	G	CNTN1	intron_variant	28	168	0.166667	0.3125	0.2	0.1667	0.04	Benign	not_provided	CNTN1	intron_variant	YES	0.052
9:33059861:C:T	.	12	40251828	G	A	LRRK2	intron_variant	13	168	0.077381	0.0938	0.1	0.0278	0.08	Benign	not_provided	LRRK2	intron_variant	YES	0.619
9:36477412:T:C	rs10844252	12	32610641	G	A	FGD4	intron_variant	165	168	0.982143	0	0.04	0.0278	0	Benign	not_provided	FGD4	intron_variant	YES	0.087
9:42320578:G:A	rs191789657	12	26556235	C	T	ITPR2	splice_region_variant&synonymous_variant	1	168	0.00595238	0.0313	0	0	0	Benign	not_provided	ITPR2	synonymous_variant	NO	9.83
9:42326234:T:A	rs73087256	12	26550237	A	T	ITPR2	intron_variant	79	168	0.470238	0.4063	0.4	0.6111	0.48	Benign	not_provided	ITPR2	intron_variant	YES	0.158
9:45110181:C:T	rs200177288	12	23755648	G	A	SOX5	synonymous_variant	3	168	0.0178571	0.0625	0.02	0	0	Benign	not_provided	SOX5	synonymous_variant	YES	3.669
9:47996359:G:A	.	12	68731798	C	T	NUP107	intron_variant	1	168	0.00595238	0.0313	0	0	0	Benign	not_provided	NUP107	intron_variant	YES	0.299
9:501823:C:T	rs369893708	12	48145078	C	T	ASB8	downstream_gene_variant	3	168	0.0178571	0.0938	0	0	0	Benign	Glycogen_storage_disease,_type_VII	PFKM	non-coding_transcript_variant,synonymous_variant	NO	1.147
9:501823:C:T	rs369893708	12	48145078	C	T	PFKM	synonymous_variant	3	168	0.0178571	0.0938	0	0	0	Benign	Glycogen_storage_disease,_type_VII	PFKM	non-coding_transcript_variant,synonymous_variant	YES	1.147
9:50425231:A:G	rs181527317	12	66371826	C	T	GRIP1	synonymous_variant	142	168	0.845238	0.3125	0.08	0.1389	0.14	Benign	not_provided	GRIP1	synonymous_variant	YES	0.085
9:5683215:A:G	rs75362705	12	15641746	C	T	EPS8	synonymous_variant	33	168	0.196429	0.9063	0.86	0.8333	0.66	Benign	not_provided	EPS8	synonymous_variant	YES	0.351
9:5767228:C:T	.	12	15569621	A	G	PTPRO	intron_variant	166	168	0.988095	0	0	0.0556	0	Benign	not_provided	PTPRO	intron_variant	YES	1.086
9:5856588:G:A	.	12	15484402	C	T	PTPRO	intron_variant	2	168	0.0119048	0	0	0	0.04	Benign	not_provided	PTPRO	intron_variant	YES	0.063
9:60073089:G:A	rs147482875	12	57193225	C	T	LRP1	synonymous_variant	6	168	0.0357143	0.0938	0.02	0	0.04	Benign	not_provided	LRP1	synonymous_variant	YES	8.849
9:60245094:C:T	rs79857347	12	57029218	G	A	MYO1A	synonymous_variant	17	168	0.10119	0.0625	0.14	0.0278	0.14	Benign	not_specified|not_provided	MYO1A	synonymous_variant	YES	3.114
9:617276:T:C	.	12	20878086	A	G	LOC100404555	intron_variant	40	168	0.238095	0.2813	0.16	0.3056	0.24	Benign	not_provided	SLCO1B3	intron_variant	NO	0.355
9:6360441:C:T	rs77796036	12	14981777	A	G	LOC100896210	downstream_gene_variant	117	168	0.696429	0.6875	0.28	0.2778	0.1	Benign	Retinal_cone_dystrophy_3A	PDE6H	3_prime_UTR_variant	NO	3.162
9:6360441:C:T	rs77796036	12	14981777	A	G	PDE6H	3_prime_UTR_variant	117	168	0.696429	0.6875	0.28	0.2778	0.1	Benign	Retinal_cone_dystrophy_3A	PDE6H	3_prime_UTR_variant	YES	3.162
9:63783727:C:T	rs116856142	12	53328449	G	A	SP7	synonymous_variant	1	168	0.00595238	0.0313	0	0	0	Benign	Osteogenesis_imperfecta|not_provided	SP7	synonymous_variant	YES	1.513
9:64290850:G:A	rs7959052	12	52811973	T	C	KRT4	missense_variant	167	168	0.994048	0	0	0.0278	0	Benign	White_sponge_nevus_1|not_provided	KRT4	missense_variant	YES	17.67
9:64295484:T:A	rs572216995	12	52806988	A	T	KRT4	3_prime_UTR_variant	4	168	0.0238095	0	0.08	0	0	Benign	White_sponge_nevus_1	KRT4	3_prime_UTR_variant	YES	1.236
9:64430660:T:C	rs143712313	12	52646928	G	A	KRT2	synonymous_variant	147	168	0.875	0	0.2	0.0278	0.2	Benign	Ichthyosis_bullosa_of_Siemens|not_provided	KRT2	synonymous_variant	YES	0.038
9:64432319:C:T	rs186531871	12	52645241	G	A	KRT2	synonymous_variant	1	168	0.00595238	0.0313	0	0	0	Benign	Ichthyosis_bullosa_of_Siemens	KRT2	synonymous_variant	YES	0.871
9:64552853:C:T	rs529397720	12	52520240	G	A	KRT5	synonymous_variant	2	168	0.0119048	0	0.04	0	0	Benign	Epidermolysis_bullosa_simplex|not_provided	KRT5	synonymous_variant	YES	2.954
9:64982282:G:A	rs61734309	12	52054916	C	T	NR4A1	synonymous_variant	1	168	0.00595238	0	0.02	0	0	Benign	not_provided	NR4A1	synonymous_variant	YES	0.027
9:66374243:A:G	rs149838843	12	50739564	C	T	DIP2B	synonymous_variant	167	168	0.994048	0.0313	0	0	0	Benign	not_provided	DIP2B	synonymous_variant	YES	0.278
9:68064030:C:T	rs369602516	12	49049982	G	A	KMT2D	synonymous_variant	37	168	0.220238	0.375	0.24	0	0.26	Benign	Kabuki_syndrome|not_provided	KMT2D	synonymous_variant	YES	0.144
9:86047832:C:T	rs75978302	12	92706817	G	A	PLEKHG7	synonymous_variant	2	168	0.0119048	0.0313	0	0.0278	0	Benign	not_provided	C12orf74	synonymous_variant	NO	4.177
9:99265075:A:T	rs76488843	12	98601739	T	A	LOC118144694	downstream_gene_variant	74	168	0.440476	0.4063	0.44	0.7222	0.66	Benign	Cardiomyopathy-hypotonia-lactic_acidosis_syndrome|not_provided	SLC25A3	3_prime_UTR_variant	NO	0.464
9:99265075:A:T	rs76488843	12	98601739	T	A	SLC25A3	3_prime_UTR_variant	74	168	0.440476	0.4063	0.44	0.7222	0.66	Benign	Cardiomyopathy-hypotonia-lactic_acidosis_syndrome|not_provided	SLC25A3	3_prime_UTR_variant	YES	0.464
9:99265075:A:T	rs76488843	12	98601739	T	A	SLC25A3	downstream_gene_variant	74	168	0.440476	0.4063	0.44	0.7222	0.66	Benign	Cardiomyopathy-hypotonia-lactic_acidosis_syndrome|not_provided	SLC25A3	3_prime_UTR_variant	NO	0.464
X:112109884:T:C	rs12853794	X	118773934	C	T	IL13RA1	synonymous_variant	152	168	0.904762	0.1563	0.1	0.0833	0.06	Benign	not_provided	IL13RA1	synonymous_variant	YES	1.365
X:112109884:T:C	rs12853794	X	118773934	C	T	LOC103790353	downstream_gene_variant	152	168	0.904762	0.1563	0.1	0.0833	0.06	Benign	not_provided	IL13RA1	synonymous_variant	NO	1.365
X:11268209:C:T	rs776298081	X	12718528	C	T	FRMPD4	synonymous_variant	18	168	0.107143	0.0938	0.14	0	0.16	Benign	not_provided	FRMPD4	synonymous_variant	YES	0.449
X:11268209:C:T	rs776298081	X	12718528	C	T	LOC118150425	intron_variant&non_coding_transcript_variant	18	168	0.107143	0.0938	0.14	0	0.16	Benign	not_provided	FRMPD4	synonymous_variant	NO	0.449
10:105999130:T:C	rs147282006	14	74536017	C	T	LTBP2	intron_variant	0	168	0	1	1	1	1	Benign/Likely_benign	not_provided	LTBP2	intron_variant	YES	0.119
10:107241005:A:C	rs146036604	14	75783181	A	C	TTLL5	missense_variant	6	168	0.0357143	0	0	0.1389	0.02	Benign/Likely_benign	not_provided	TTLL5	missense_variant	YES	15.86
10:107241005:A:C	rs146036604	14	75783181	A	C	TTLL5	non_coding_transcript_exon_variant	6	168	0.0357143	0	0	0.1389	0.02	Benign/Likely_benign	not_provided	TTLL5	missense_variant	NO	15.86
10:133467845:T:G	rs202110844	14	101979309	T	G	DYNC1H1	intron_variant	3	168	0.0178571	0.0625	0	0.0278	0	Benign/Likely_benign	Charcot-Marie-Tooth_disease_axonal_type_2O|Charcot-Marie-Tooth_disease|Autosomal_dominant_cerebellar_ataxia|not_provided	DYNC1H1	intron_variant	YES	4.397
10:136147787:A:C	rs769756576	14	104707596	A	C	INF2	synonymous_variant	3	156	0.0192308	0.0357	0.0217	0.0294	0	Benign/Likely_benign	Focal_segmental_glomerulosclerosis_5|Charcot-Marie-Tooth_disease_dominant_intermediate_E	INF2	synonymous_variant	YES	2.408
10:18716958:C:T	rs115331762	15	74180851	C	T	ISLR	downstream_gene_variant	21	168	0.125	0.25	0.18	0	0.08	Benign/Likely_benign	Matthew-Wood_syndrome|not_provided	STRA6	missense_variant	NO	7.127
10:18716958:C:T	rs115331762	15	74180851	C	T	STRA6	missense_variant	21	168	0.125	0.25	0.18	0	0.08	Benign/Likely_benign	Matthew-Wood_syndrome|not_provided	STRA6	missense_variant	YES	7.127
10:26587627:G:A	rs78369269	15	42390090	G	A	CAPN3	synonymous_variant	7	168	0.0416667	0.1563	0.02	0	0.02	Benign/Likely_benign	Autosomal_recessive_limb-girdle_muscular_dystrophy_type_2A|not_specified|not_provided	CAPN3	synonymous_variant,intron_variant	YES	0.613
10:26587627:G:A	rs78369269	15	42390090	G	A	LOC118145087	downstream_gene_variant	7	168	0.0416667	0.1563	0.02	0	0.02	Benign/Likely_benign	Autosomal_recessive_limb-girdle_muscular_dystrophy_type_2A|not_specified|not_provided	CAPN3	synonymous_variant,intron_variant	NO	0.613
10:26587627:G:A	rs78369269	15	42390090	G	A	LOC118145088	upstream_gene_variant	7	168	0.0416667	0.1563	0.02	0	0.02	Benign/Likely_benign	Autosomal_recessive_limb-girdle_muscular_dystrophy_type_2A|not_specified|not_provided	CAPN3	synonymous_variant,intron_variant	NO	0.613
10:32977049:T:C	rs577873248	15	48738303	C	T	CEP152	downstream_gene_variant	162	168	0.964286	0.1563	0.02	0	0	Benign/Likely_benign	not_specified|not_provided	CEP152	synonymous_variant	NO	0.155
10:32977049:T:C	rs577873248	15	48738303	C	T	CEP152	synonymous_variant	162	168	0.964286	0.1563	0.02	0	0	Benign/Likely_benign	not_specified|not_provided	CEP152	synonymous_variant	YES	0.155
10:51666014:G:A	rs61755047	14	20476410	G	A	PNP	missense_variant	8	168	0.047619	0	0.12	0.0556	0	Benign/Likely_benign	Purine-nucleoside_phosphorylase_deficiency|not_provided	PNP	missense_variant	YES	20.1
10:52386785:C:T	rs763874660	14	21409897	C	T	CHD8	missense_variant	12	168	0.0714286	0	0.14	0	0.1	Benign/Likely_benign	Inborn_genetic_diseases|not_provided	CHD8	missense_variant	YES	22.2
10:54236137:G:A	.	14	23419523	G	A	LOC100400430	synonymous_variant	1	168	0.00595238	0	0	0.0278	0	Benign/Likely_benign	Hypertrophic_cardiomyopathy|not_provided	MYH7	synonymous_variant	NO	5.509
10:54242216:G:A	rs140380523	14	23426035	A	G	LOC100400430	synonymous_variant	160	168	0.952381	0	0.04	0	0.12	Benign/Likely_benign	Cardiomyopathy|Hypertrophic_cardiomyopathy|not_specified|Cardiovascular_phenotype	MYH7	synonymous_variant	NO	3.35
10:95993933:C:T	rs17180350	14	64782348	C	T	SPTB	missense_variant	2	168	0.0119048	0	0	0	0.04	Benign/Likely_benign	Elliptocytosis|not_specified|Spherocytosis,_Dominant|not_provided	SPTB	missense_variant	YES	17.63
10:99370009:C:T	rs150070634	14	67813973	T	C	ZFYVE26	intron_variant	128	168	0.761905	0.2813	0.1	0.4444	0.2	Benign/Likely_benign	Spastic_paraplegia|Hereditary_spastic_paraplegia_15	ZFYVE26	intron_variant	YES	15.22
1:107484119:C:T	rs113456345	9	2718030	C	T	KCNV2	synonymous_variant	3	168	0.0178571	0	0	0.0833	0	Benign/Likely_benign	Cone_dystrophy_with_supernormal_rod_response|not_specified|not_provided	KCNV2	synonymous_variant	YES	1.607
11:109871142:A:G	rs114920029	11	46889475	G	A	LRP4	synonymous_variant	167	168	0.994048	0	0	0	0.02	Benign/Likely_benign	Cenani-Lenz_syndactyly_syndrome|Sclerosteosis_2|Congenital_myasthenic_syndrome_17|not_provided	LRP4	synonymous_variant	YES	12.87
11:109876786:C:T	rs143481229	11	46894764	T	C	LRP4	synonymous_variant	141	168	0.839286	0.2188	0.18	0.0278	0.2	Benign/Likely_benign	Cenani-Lenz_syndactyly_syndrome|Sclerosteosis_2|Congenital_myasthenic_syndrome_17|not_provided	LRP4	synonymous_variant	YES	11.43
11:110311018:C:T	rs367927327	11	47333239	C	T	MADD	downstream_gene_variant	1	168	0.00595238	0.0313	0	0	0	Benign/Likely_benign	Cardiomyopathy|Hypertrophic_cardiomyopathy|Hypertrophic_cardiomyopathy_4|not_specified|Cardiovascular_phenotype|not_provided	MYBPC3	synonymous_variant	NO	0.121
11:110311018:C:T	rs367927327	11	47333239	C	T	MYBPC3	synonymous_variant	1	168	0.00595238	0.0313	0	0	0	Benign/Likely_benign	Cardiomyopathy|Hypertrophic_cardiomyopathy|Hypertrophic_cardiomyopathy_4|not_specified|Cardiovascular_phenotype|not_provided	MYBPC3	synonymous_variant	YES	0.121
11:110322968:G:A	rs3729945	11	47342761	G	A	MYBPC3	intron_variant	1	168	0.00595238	0.0313	0	0	0	Benign/Likely_benign	Hypertrophic_cardiomyopathy|Hypertrophic_cardiomyopathy_4|not_specified|not_provided	MYBPC3	intron_variant	YES	8.945
11:113119932:C:T	rs201627388	11	57600292	C	T	SERPING1	synonymous_variant	1	168	0.00595238	0	0	0.0278	0	Benign/Likely_benign	Hereditary_angioedema_type_1|not_provided	SERPING1	synonymous_variant	YES	0.381
11:121545275:G:A	rs35520756	11	66519725	G	A	BBS1	missense_variant	3	168	0.0178571	0	0.02	0.0556	0	Benign/Likely_benign	Bardet-Biedl_syndrome_1|Bardet-Biedl_syndrome|not_specified|not_provided	BBS1	missense_variant	YES	24.2
11:126917083:T:C	rs146324627	11	2848734	G	A	KCNQ1	3_prime_UTR_variant	157	168	0.934524	0	0.06	0	0.16	Benign/Likely_benign	Atrial_fibrillation,_familial,_3|Short_QT_syndrome_type_2|Congenital_long_QT_syndrome|Jervell_and_Lange-Nielsen_syndrome_1|Long_QT_syndrome_1|not_provided	KCNQ1	3_prime_UTR_variant	YES	0.059
11:127378359:A:G	rs143644902	11	2395475	T	C	CD81	synonymous_variant	42	168	0.25	0.1563	0.36	0.4167	0.08	Benign/Likely_benign	not_specified|not_provided	CD81	synonymous_variant	YES	0.425
11:127378359:A:G	rs143644902	11	2395475	T	C	TSSC4	upstream_gene_variant	42	168	0.25	0.1563	0.36	0.4167	0.08	Benign/Likely_benign	not_specified|not_provided	CD81	synonymous_variant	NO	0.425
11:128039745:C:T	rs375282504	11	1757398	G	A	CTSD	synonymous_variant	29	168	0.172619	0.125	0.2	0.3333	0.06	Benign/Likely_benign	Neuronal_ceroid_lipofuscinosis|Inborn_genetic_diseases|not_specified	CTSD	synonymous_variant	YES	1.314
11:26337625:C:T	rs140848236	11	128911465	C	T	KCNJ5	synonymous_variant	3	168	0.0178571	0.0625	0.02	0	0	Benign/Likely_benign	Long_QT_syndrome|Cardiovascular_phenotype|not_provided	KCNJ5	synonymous_variant	YES	3.127
1:144896905:G:A	rs371998319	9	98496482	G	A	GABBR2	5_prime_UTR_variant	31	168	0.184524	0.4688	0.1	0.1389	0.12	Benign/Likely_benign	Epileptic_encephalopathy|not_provided	GABBR2	synonymous_variant	NO	6.093
1:144896905:G:A	rs371998319	9	98496482	G	A	GABBR2	synonymous_variant	31	168	0.184524	0.4688	0.1	0.1389	0.12	Benign/Likely_benign	Epileptic_encephalopathy|not_provided	GABBR2	synonymous_variant	YES	6.093
1:157313773:T:C	rs199705752	9	110682666	C	T	MUSK	splice_region_variant&intron_variant	158	168	0.940476	0.0938	0.02	0.1389	0.02	Benign/Likely_benign	Fetal_akinesia_deformation_sequence_1|Congenital_myasthenic_syndrome_9	MUSK	intron_variant	NO	0.639
11:5882025:G:A	rs563651647	11	108331570	G	A	ATM	intron_variant	16	168	0.0952381	0.1563	0.12	0.0833	0.04	Benign/Likely_benign	Carcinoma_of_colon|Ataxia-telangiectasia_syndrome|Hereditary_cancer-predisposing_syndrome|not_specified	ATM	intron_variant	YES	12.37
11:5882025:G:A	rs563651647	11	108331570	G	A	ATM	intron_variant&non_coding_transcript_variant	16	168	0.0952381	0.1563	0.12	0.0833	0.04	Benign/Likely_benign	Carcinoma_of_colon|Ataxia-telangiectasia_syndrome|Hereditary_cancer-predisposing_syndrome|not_specified	ATM	intron_variant	NO	12.37
11:5882025:G:A	rs563651647	11	108331570	G	A	C11H11orf65	intron_variant	16	168	0.0952381	0.1563	0.12	0.0833	0.04	Benign/Likely_benign	Carcinoma_of_colon|Ataxia-telangiectasia_syndrome|Hereditary_cancer-predisposing_syndrome|not_specified	ATM	intron_variant	NO	12.37
11:73610504:C:T	rs191964053	11	9812559	C	T	LOC118145816	downstream_gene_variant	1	168	0.00595238	0	0	0.0278	0	Benign/Likely_benign	Charcot-Marie-Tooth_disease_type_4B2|Charcot-Marie-Tooth_disease_type_4|Inborn_genetic_diseases|not_specified|not_provided	SBF2	synonymous_variant	NO	1.184
11:73610504:C:T	rs191964053	11	9812559	C	T	SBF2	synonymous_variant	1	168	0.00595238	0	0	0.0278	0	Benign/Likely_benign	Charcot-Marie-Tooth_disease_type_4B2|Charcot-Marie-Tooth_disease_type_4|Inborn_genetic_diseases|not_specified|not_provided	SBF2	synonymous_variant	YES	1.184
1:175439495:A:G	rs201168391	9	128582734	G	A	SPTAN1	missense_variant	48	168	0.285714	0.75	0.68	0.7778	0.68	Benign/Likely_benign	Developmental_and_epileptic_encephalopathy,_5|Early_infantile_epileptic_encephalopathy_with_suppression_bursts|not_specified	SPTAN1	missense_variant	YES	9.525
1:175465304:C:T	rs367772623	9	128608918	C	T	SPTAN1	synonymous_variant	4	168	0.0238095	0	0	0.0278	0.06	Benign/Likely_benign	Developmental_and_epileptic_encephalopathy,_5|Early_infantile_epileptic_encephalopathy_with_suppression_bursts|Inborn_genetic_diseases|not_specified	SPTAN1	synonymous_variant	YES	1.474
1:177962440:G:A	rs116422150	9	131052652	G	A	LAMC3	missense_variant	2	168	0.0119048	0	0	0.0556	0	Benign/Likely_benign	not_specified|not_provided	LAMC3	missense_variant	YES	12.72
1:179738719:G:A	rs140622357	9	132896502	G	A	TSC1	synonymous_variant	2	168	0.0119048	0	0	0.0556	0	Benign/Likely_benign	Tuberous_sclerosis_1|Hereditary_cancer-predisposing_syndrome	TSC1	synonymous_variant	YES	1.372
11:81449549:G:A	.	11	17553405	G	A	OTOG	synonymous_variant	4	168	0.0238095	0.125	0	0	0	Benign/Likely_benign	not_provided	OTOG	synonymous_variant	YES	4.265
1:181561499:C:T	rs367755808	9	134768445	C	T	COL5A1	synonymous_variant	18	168	0.107143	0.0625	0.16	0.1667	0.04	Benign/Likely_benign	Ehlers-Danlos_syndrome,_classic_type,_1|Familial_thoracic_aortic_aneurysm_and_aortic_dissection|FIBROMUSCULAR_DYSPLASIA,_MULTIFOCAL|not_specified	COL5A1	synonymous_variant	YES	6.431
1:181610528:C:T	rs142248898	9	134817836	C	T	COL5A1	splice_region_variant&intron_variant	7	168	0.0416667	0	0.1	0.0556	0	Benign/Likely_benign	Connective_tissue_disorder|Ehlers-Danlos_syndrome,_classic_type|Ehlers-Danlos_syndrome,_classic_type,_1|Ehlers-Danlos_syndrome,_classic_type,_2|Familial_thoracic_aortic_aneurysm_and_aortic_dissection|Ehlers-Danlos_syndrome|Ehlers-Danlos_syndrome_type_7A|FIBROMUSCULAR_DYSPLASIA,_MULTIFOCAL|not_specified|not_provided	COL5A1	intron_variant	NO	0.167
1:181610529:G:A	rs77176843	9	134817837	G	A	COL5A1	splice_region_variant&intron_variant	37	168	0.220238	0.0625	0.36	0.1667	0.22	Benign/Likely_benign	Ehlers-Danlos_syndrome,_classic_type,_1|Ehlers-Danlos_syndrome|Ehlers-Danlos_syndrome_type_7A|FIBROMUSCULAR_DYSPLASIA,_MULTIFOCAL|not_specified|not_provided	COL5A1	intron_variant	NO	1.351
1:182528311:T:C	rs374429090	9	135786514	C	T	KCNT1	synonymous_variant	9	168	0.0535714	1	1	1	0.82	Benign/Likely_benign	Developmental_and_epileptic_encephalopathy,_14|Autosomal_dominant_nocturnal_frontal_lobe_epilepsy_5|Inborn_genetic_diseases|not_specified|not_provided	KCNT1	synonymous_variant	YES	0.529
1:183227891:G:A	rs370523171	9	136504882	G	A	NOTCH1	synonymous_variant	15	168	0.0892857	0.1875	0.04	0.0833	0.08	Benign/Likely_benign	Connective_tissue_disorder|Adams-Oliver_syndrome_5|Familial_thoracic_aortic_aneurysm_and_aortic_dissection|Aortic_valve_disease_1|not_provided	NOTCH1	synonymous_variant	YES	7.672
1:183231956:C:T	rs371532644	9	136508999	C	T	NOTCH1	synonymous_variant	5	168	0.0297619	0	0.04	0	0.06	Benign/Likely_benign	Adams-Oliver_syndrome_5|Familial_thoracic_aortic_aneurysm_and_aortic_dissection|Aortic_valve_disease_1|not_provided	NOTCH1	synonymous_variant	YES	8.573
1:183233704:G:A	rs374946182	9	136510753	G	A	NOTCH1	synonymous_variant	13	168	0.077381	0.1875	0.04	0.0278	0.08	Benign/Likely_benign	Connective_tissue_disorder|Adams-Oliver_syndrome_5|Familial_thoracic_aortic_aneurysm_and_aortic_dissection|Aortic_valve_disease_1	NOTCH1	synonymous_variant	YES	0.078
1:190942136:A:G	rs137942040	22	23833572	C	T	DERL3	downstream_gene_variant	166	168	0.988095	0	0.02	0	0.02	Benign/Likely_benign	Hereditary_cancer-predisposing_syndrome|not_provided	SMARCB1	synonymous_variant	NO	14
1:190942136:A:G	rs137942040	22	23833572	C	T	LOC103791252	intron_variant	166	168	0.988095	0	0.02	0	0.02	Benign/Likely_benign	Hereditary_cancer-predisposing_syndrome|not_provided	SMARCB1	synonymous_variant	NO	14
1:190942136:A:G	rs137942040	22	23833572	C	T	SMARCB1	splice_region_variant&synonymous_variant	166	168	0.988095	0	0.02	0	0.02	Benign/Likely_benign	Hereditary_cancer-predisposing_syndrome|not_provided	SMARCB1	synonymous_variant	NO	14
1:207310271:C:T	rs199703563	22	37978057	C	T	SOX10	synonymous_variant	96	168	0.571429	0.5625	0.56	0.4167	0.7	Benign/Likely_benign	PCWH_syndrome|Waardenburg_syndrome|not_provided	SOX10	synonymous_variant,intron_variant	YES	6.406
1:210001386:G:A	rs147383232	22	19883334	G	A	TXNRD2	synonymous_variant	1	168	0.00595238	0	0.02	0	0	Benign/Likely_benign	Primary_dilated_cardiomyopathy|Cardiovascular_phenotype|not_provided	TXNRD2	non-coding_transcript_variant,synonymous_variant	YES	1.643
12:11310666:G:A	rs149529195	16	15704114	G	A	MYH11	3_prime_UTR_variant	10	168	0.0595238	0.0938	0.08	0	0.06	Benign/Likely_benign	Familial_thoracic_aortic_aneurysm_and_aortic_dissection|not_specified|not_provided	MYH11	synonymous_variant,3_prime_UTR_variant,intron_variant	YES	7.216
12:11310666:G:A	rs149529195	16	15704114	G	A	MYH11	synonymous_variant	10	168	0.0595238	0.0938	0.08	0	0.06	Benign/Likely_benign	Familial_thoracic_aortic_aneurysm_and_aortic_dissection|not_specified|not_provided	MYH11	synonymous_variant,3_prime_UTR_variant,intron_variant	YES	7.216
12:11310666:G:A	rs149529195	16	15704114	G	A	NDE1	downstream_gene_variant	10	168	0.0595238	0.0938	0.08	0	0.06	Benign/Likely_benign	Familial_thoracic_aortic_aneurysm_and_aortic_dissection|not_specified|not_provided	MYH11	synonymous_variant,3_prime_UTR_variant,intron_variant	NO	7.216
12:11310666:G:A	rs149529195	16	15704114	G	A	NDE1	intron_variant	10	168	0.0595238	0.0938	0.08	0	0.06	Benign/Likely_benign	Familial_thoracic_aortic_aneurysm_and_aortic_dissection|not_specified|not_provided	MYH11	synonymous_variant,3_prime_UTR_variant,intron_variant	NO	7.216
12:11323222:G:A	rs35295469	16	15717274	G	A	MYH11	synonymous_variant	9	168	0.0535714	0.0625	0.12	0	0.02	Benign/Likely_benign	Aortic_aneurysm,_familial_thoracic_4|Familial_thoracic_aortic_aneurysm_and_aortic_dissection|not_specified|not_provided	MYH11	synonymous_variant,intron_variant	YES	0.132
12:11323222:G:A	rs35295469	16	15717274	G	A	NDE1	intron_variant	9	168	0.0535714	0.0625	0.12	0	0.02	Benign/Likely_benign	Aortic_aneurysm,_familial_thoracic_4|Familial_thoracic_aortic_aneurysm_and_aortic_dissection|not_specified|not_provided	MYH11	synonymous_variant,intron_variant	NO	0.132
12:15241615:C:T	rs549492447	16	11553553	G	A	LITAF	synonymous_variant	4	168	0.0238095	0	0.08	0	0	Benign/Likely_benign	Charcot-Marie-Tooth_disease_type_1C|Charcot-Marie-Tooth_disease|not_provided	LITAF	non-coding_transcript_variant,synonymous_variant	YES	2.684
1:217403178:A:G	rs34562250	22	50218796	G	A	SELENOO	downstream_gene_variant	165	168	0.982143	0	0.02	0	0.04	Benign/Likely_benign	not_provided	TUBGCP6	synonymous_variant	NO	0.068
1:217403178:A:G	rs34562250	22	50218796	G	A	TUBGCP6	synonymous_variant	165	168	0.982143	0	0.02	0	0.04	Benign/Likely_benign	not_provided	TUBGCP6	synonymous_variant	YES	0.068
1:217413358:G:A	rs34273213	22	50229576	G	A	TUBGCP6	missense_variant&splice_region_variant	140	168	0.833333	0.8438	0.8	0.7222	0.94	Benign/Likely_benign	not_specified|not_provided	TUBGCP6	missense_variant	NO	0.997
1:217689307:A:G	rs75485962	22	50524085	G	A	NCAPH2	3_prime_UTR_variant	165	168	0.982143	0	0.02	0	0.04	Benign/Likely_benign	Cytochrome-c_oxidase_deficiency_disease|Mitochondrial_DNA_depletion_syndrome_1|Cardioencephalomyopathy,_fatal_infantile,_due_to_cytochrome_c_oxidase_deficiency_1|not_specified|Fatal_Infantile_Cardioencephalomyopathy|not_provided	TYMP	synonymous_variant,3_prime_UTR_variant	NO	8.734
1:217689307:A:G	rs75485962	22	50524085	G	A	NCAPH2	downstream_gene_variant	165	168	0.982143	0	0.02	0	0.04	Benign/Likely_benign	Cytochrome-c_oxidase_deficiency_disease|Mitochondrial_DNA_depletion_syndrome_1|Cardioencephalomyopathy,_fatal_infantile,_due_to_cytochrome_c_oxidase_deficiency_1|not_specified|Fatal_Infantile_Cardioencephalomyopathy|not_provided	TYMP	synonymous_variant,3_prime_UTR_variant	NO	8.734
1:217689307:A:G	rs75485962	22	50524085	G	A	NCAPH2	intron_variant	165	168	0.982143	0	0.02	0	0.04	Benign/Likely_benign	Cytochrome-c_oxidase_deficiency_disease|Mitochondrial_DNA_depletion_syndrome_1|Cardioencephalomyopathy,_fatal_infantile,_due_to_cytochrome_c_oxidase_deficiency_1|not_specified|Fatal_Infantile_Cardioencephalomyopathy|not_provided	TYMP	synonymous_variant,3_prime_UTR_variant	NO	8.734
1:217689307:A:G	rs75485962	22	50524085	G	A	SCO2	synonymous_variant	165	168	0.982143	0	0.02	0	0.04	Benign/Likely_benign	Cytochrome-c_oxidase_deficiency_disease|Mitochondrial_DNA_depletion_syndrome_1|Cardioencephalomyopathy,_fatal_infantile,_due_to_cytochrome_c_oxidase_deficiency_1|not_specified|Fatal_Infantile_Cardioencephalomyopathy|not_provided	TYMP	synonymous_variant,3_prime_UTR_variant	NO	8.734
1:217689307:A:G	rs75485962	22	50524085	G	A	TYMP	downstream_gene_variant	165	168	0.982143	0	0.02	0	0.04	Benign/Likely_benign	Cytochrome-c_oxidase_deficiency_disease|Mitochondrial_DNA_depletion_syndrome_1|Cardioencephalomyopathy,_fatal_infantile,_due_to_cytochrome_c_oxidase_deficiency_1|not_specified|Fatal_Infantile_Cardioencephalomyopathy|not_provided	TYMP	synonymous_variant,3_prime_UTR_variant	NO	8.734
12:21909276:C:T	rs182494675	16	23630360	C	T	PALB2	non_coding_transcript_exon_variant	4	168	0.0238095	0.0625	0.02	0.0278	0	Benign/Likely_benign	Hereditary_cancer-predisposing_syndrome|Familial_cancer_of_breast|not_specified|not_provided	PALB2	synonymous_variant	NO	0.329
12:21909276:C:T	rs182494675	16	23630360	C	T	PALB2	synonymous_variant	4	168	0.0238095	0.0625	0.02	0.0278	0	Benign/Likely_benign	Hereditary_cancer-predisposing_syndrome|Familial_cancer_of_breast|not_specified|not_provided	PALB2	synonymous_variant	YES	0.329
12:2455071:G:A	rs45517416	16	2088431	C	T	LOC118146169	upstream_gene_variant	51	168	0.303571	0.375	0.3	0.4444	0.16	Benign/Likely_benign	Tuberous_sclerosis_syndrome|Tuberous_sclerosis_2|not_specified|not_provided	TSC2	intron_variant	NO	0.003
12:2455071:G:A	rs45517416	16	2088431	C	T	PKD1	downstream_gene_variant	51	168	0.303571	0.375	0.3	0.4444	0.16	Benign/Likely_benign	Tuberous_sclerosis_syndrome|Tuberous_sclerosis_2|not_specified|not_provided	TSC2	intron_variant	NO	0.003
12:2455071:G:A	rs45517416	16	2088431	C	T	TSC2	intron_variant	51	168	0.303571	0.375	0.3	0.4444	0.16	Benign/Likely_benign	Tuberous_sclerosis_syndrome|Tuberous_sclerosis_2|not_specified|not_provided	TSC2	intron_variant	YES	0.003
12:2461513:G:A	rs45466493	16	2081754	C	T	TSC2	missense_variant	3	168	0.0178571	0	0	0.0833	0	Benign/Likely_benign	Tuberous_sclerosis_syndrome|Tuberous_sclerosis_2|Hereditary_cancer-predisposing_syndrome|not_specified|not_provided	TSC2	missense_variant	YES	17.77
12:2466419:C:T	rs397515046	16	2076498	G	A	TSC2	missense_variant	1	168	0.00595238	0	0	0.0278	0	Benign/Likely_benign	Tuberous_sclerosis_syndrome|Tuberous_sclerosis_2|Hereditary_cancer-predisposing_syndrome|not_provided	TSC2	missense_variant	YES	26.4
12:2471207:C:T	rs370553131	16	2071909	G	A	TSC2	missense_variant	5	168	0.0297619	0.0313	0.04	0.0556	0	Benign/Likely_benign	Tuberous_sclerosis_2|Hereditary_cancer-predisposing_syndrome	TSC2	missense_variant	YES	22.8
12:2471321:C:T	rs201633455	16	2071780	G	A	TSC2	splice_region_variant&intron_variant	10	168	0.0595238	0	0.06	0	0.14	Benign/Likely_benign	Tuberous_sclerosis_syndrome|Tuberous_sclerosis_2|Hereditary_cancer-predisposing_syndrome	TSC2	intron_variant	NO	0.097
12:2483252:A:G	rs45498496	16	2056214	C	T	TSC2	synonymous_variant	115	168	0.684524	0.5	0.24	0.4722	0.16	Benign/Likely_benign	Tuberous_sclerosis_2|Hereditary_cancer-predisposing_syndrome|not_provided	TSC2	synonymous_variant	YES	1.444
12:2485673:G:A	rs752498350	16	2053413	C	T	TSC2	synonymous_variant	1	168	0.00595238	0	0	0	0.02	Benign/Likely_benign	Tuberous_sclerosis_syndrome|Tuberous_sclerosis_2|Hereditary_cancer-predisposing_syndrome|not_provided	TSC2	synonymous_variant,intron_variant	YES	0.269
12:2485673:G:A	rs752498350	16	2053413	C	T	TSC2	upstream_gene_variant	1	168	0.00595238	0	0	0	0.02	Benign/Likely_benign	Tuberous_sclerosis_syndrome|Tuberous_sclerosis_2|Hereditary_cancer-predisposing_syndrome|not_provided	TSC2	synonymous_variant,intron_variant	NO	0.269
12:3467776:A:G	rs140844106	16	3583414	G	A	LOC103796522	upstream_gene_variant	102	168	0.607143	0.3438	0.5	0.3889	0.32	Benign/Likely_benign	Fanconi_anemia|not_specified	SLX4	synonymous_variant	NO	0.033
12:3467776:A:G	rs140844106	16	3583414	G	A	SLX4	synonymous_variant	102	168	0.607143	0.3438	0.5	0.3889	0.32	Benign/Likely_benign	Fanconi_anemia|not_specified	SLX4	synonymous_variant	YES	0.033
12:48065478:G:A	rs1059058	10	79613972	C	T	SFTPA2	synonymous_variant	4	168	0.0238095	0	0.04	0	0.04	Benign/Likely_benign	not_specified|not_provided	SFTPA1	synonymous_variant	NO	0.306
12:67606402:C:T	rs117138204	10	60208183	G	A	ANK3	synonymous_variant	8	168	0.047619	0.0313	0.08	0.0556	0.02	Benign/Likely_benign	not_specified|not_provided	ANK3	synonymous_variant	YES	7.473
13:1559028:T:C	rs753430388	8	1771165	C	T	CLN8	synonymous_variant	165	168	0.982143	0	0	0	0.06	Benign/Likely_benign	Neuronal_ceroid_lipofuscinosis_8|Neuronal_ceroid_lipofuscinosis|Inborn_genetic_diseases|not_provided	CLN8	synonymous_variant	YES	4.117
13:16291206:G:A	rs529959941	8	22164017	C	T	BMP1	upstream_gene_variant	1	168	0.00595238	0	0.02	0	0	Benign/Likely_benign	Hereditary_pulmonary_alveolar_proteinosis|Surfactant_metabolism_dysfunction,_pulmonary,_2|Interstitial_lung_disease_2	SFTPC	synonymous_variant	NO	9.858
13:16291206:G:A	rs529959941	8	22164017	C	T	SFTPC	synonymous_variant	1	168	0.00595238	0	0.02	0	0	Benign/Likely_benign	Hereditary_pulmonary_alveolar_proteinosis|Surfactant_metabolism_dysfunction,_pulmonary,_2|Interstitial_lung_disease_2	SFTPC	synonymous_variant	YES	9.858
13:29278720:G:A	rs11574345	8	31142629	G	A	WRN	synonymous_variant	21	168	0.125	0.0625	0.26	0.0278	0.1	Benign/Likely_benign	Werner_syndrome	WRN	synonymous_variant	YES	2.681
13:36175832:G:A	rs17182463	8	38413633	G	A	FGFR1	missense_variant	8	168	0.047619	0.0313	0.08	0.0278	0.04	Benign/Likely_benign	Craniosynostosis_syndrome|Pfeiffer_syndrome|Hypogonadotropic_hypogonadism_2_with_or_without_anosmia|Osteoglophonic_dysplasia|Trigonocephaly_1|not_provided	FGFR1	missense_variant,intron_variant	YES	32
13:36175832:G:A	rs17182463	8	38413633	G	A	LETM2	downstream_gene_variant	8	168	0.047619	0.0313	0.08	0.0278	0.04	Benign/Likely_benign	Craniosynostosis_syndrome|Pfeiffer_syndrome|Hypogonadotropic_hypogonadism_2_with_or_without_anosmia|Osteoglophonic_dysplasia|Trigonocephaly_1|not_provided	FGFR1	missense_variant,intron_variant	NO	32
13:63080345:T:C	rs202215313	18	23861780	C	T	LAMA3	synonymous_variant	158	168	0.940476	0.0625	0.1	0.0556	0.02	Benign/Likely_benign	Junctional_epidermolysis_bullosa,_non-Herlitz_type|Junctional_epidermolysis_bullosa_gravis_of_Herlitz|Laryngo-onycho-cutaneous_syndrome|not_provided	LAMA3	synonymous_variant	YES	0.011
13:8402009:T:C	.	8	10612589	G	A	RP1L1	synonymous_variant	51	168	0.303571	0.6563	0.78	0.6389	0.68	Benign/Likely_benign	not_specified|not_provided	RP1L1	synonymous_variant	YES	0.684
14:40676385:A:G	rs72902461	2	70212794	C	T	LOC118147292	upstream_gene_variant	166	168	0.988095	0	0.02	0	0.02	Benign/Likely_benign	Welander_distal_myopathy|not_specified|not_provided	TIA1	non-coding_transcript_variant,synonymous_variant	NO	0.078
14:40676385:A:G	rs72902461	2	70212794	C	T	TIA1	downstream_gene_variant	166	168	0.988095	0	0.02	0	0.02	Benign/Likely_benign	Welander_distal_myopathy|not_specified|not_provided	TIA1	non-coding_transcript_variant,synonymous_variant	NO	0.078
14:40676385:A:G	rs72902461	2	70212794	C	T	TIA1	non_coding_transcript_exon_variant	166	168	0.988095	0	0.02	0	0.02	Benign/Likely_benign	Welander_distal_myopathy|not_specified|not_provided	TIA1	non-coding_transcript_variant,synonymous_variant	NO	0.078
14:40676385:A:G	rs72902461	2	70212794	C	T	TIA1	synonymous_variant	166	168	0.988095	0	0.02	0	0.02	Benign/Likely_benign	Welander_distal_myopathy|not_specified|not_provided	TIA1	non-coding_transcript_variant,synonymous_variant	YES	0.078
14:82626355:G:A	rs138771319	2	29225531	C	T	ALK	synonymous_variant	33	168	0.196429	0.375	0.2	0.0833	0.16	Benign/Likely_benign	Neuroblastoma,_susceptibility_to,_3|Hereditary_cancer-predisposing_syndrome|not_provided	ALK	synonymous_variant	YES	0.116
14:96510948:T:C	rs147322367	2	15394267	G	A	NBAS	missense_variant	64	168	0.380952	0.7813	0.66	0.6111	0.48	Benign/Likely_benign	not_specified|not_provided	NBAS	missense_variant,non-coding_transcript_variant	YES	25.5
15:24233142:A:G	rs140803915	3	47121069	G	A	SETD2	non_coding_transcript_exon_variant	40	168	0.238095	0.625	0.9	0.8056	0.68	Benign/Likely_benign	Luscan-Lumish_syndrome|not_specified|not_provided	SETD2	non-coding_transcript_variant,synonymous_variant	NO	0.179
15:24233142:A:G	rs140803915	3	47121069	G	A	SETD2	synonymous_variant	40	168	0.238095	0.625	0.9	0.8056	0.68	Benign/Likely_benign	Luscan-Lumish_syndrome|not_specified|not_provided	SETD2	non-coding_transcript_variant,synonymous_variant	YES	0.179
15:24515607:G:A	.	3	47411343	G	A	PTPN23	missense_variant	28	168	0.166667	0.0313	0.34	0.0556	0.16	Benign/Likely_benign	not_provided	PTPN23	missense_variant	YES	23
15:24515607:G:A	.	3	47411343	G	A	SCAP	downstream_gene_variant	28	168	0.166667	0.0313	0.34	0.0556	0.16	Benign/Likely_benign	not_provided	PTPN23	missense_variant	NO	23
15:25677627:G:A	rs146901730	3	48575531	G	A	COL7A1	synonymous_variant	1	168	0.00595238	0	0.02	0	0	Benign/Likely_benign	Epidermolysis_bullosa_dystrophica|Epidermolysis_bullosa_dystrophica_inversa,_autosomal_recessive|not_specified|not_provided	COL7A1	synonymous_variant	YES	0.346
15:34391574:T:C	rs112864468	3	58123230	C	T	FLNB	non_coding_transcript_exon_variant	135	168	0.803571	0.1563	0.18	0.4167	0.08	Benign/Likely_benign	Connective_tissue_disorder|not_specified|FLNB-Related_Spectrum_Disorders|not_provided	FLNB	synonymous_variant	NO	0.305
15:34391574:T:C	rs112864468	3	58123230	C	T	FLNB	synonymous_variant	135	168	0.803571	0.1563	0.18	0.4167	0.08	Benign/Likely_benign	Connective_tissue_disorder|not_specified|FLNB-Related_Spectrum_Disorders|not_provided	FLNB	synonymous_variant	YES	0.305
15:34419470:C:T	rs145280904	3	58149989	C	T	FLNB	non_coding_transcript_exon_variant	2	168	0.0119048	0	0	0	0.04	Benign/Likely_benign	Connective_tissue_disorder|not_specified|FLNB-Related_Spectrum_Disorders|not_provided	FLNB	synonymous_variant	NO	0.199
15:34419470:C:T	rs145280904	3	58149989	C	T	FLNB	synonymous_variant	2	168	0.0119048	0	0	0	0.04	Benign/Likely_benign	Connective_tissue_disorder|not_specified|FLNB-Related_Spectrum_Disorders|not_provided	FLNB	synonymous_variant	YES	0.199
15:54778894:A:G	rs149263693	3	3137442	A	G	TRNT1	missense_variant	1	168	0.00595238	0	0	0.0278	0	Benign/Likely_benign	Congenital_sideroblastic_anemia-B-cell_immunodeficiency-periodic_fever-developmental_delay_syndrome|not_provided	TRNT1	missense_variant,non-coding_transcript_variant	YES	16.57
15:56432072:C:T	rs41290672	3	4800591	C	T	ITPR1	synonymous_variant	3	168	0.0178571	0.0625	0	0	0.02	Benign/Likely_benign	Autosomal_dominant_cerebellar_ataxia|not_specified|not_provided	ITPR1	synonymous_variant	YES	3.648
15:58394565:C:T	rs142650646	3	6861532	C	T	GRM7	non_coding_transcript_exon_variant	8	168	0.047619	0	0	0.1667	0.04	Benign/Likely_benign	not_provided	GRM7	synonymous_variant	NO	11.75
15:58394565:C:T	rs142650646	3	6861532	C	T	GRM7	synonymous_variant	8	168	0.047619	0	0	0.1667	0.04	Benign/Likely_benign	not_provided	GRM7	synonymous_variant	YES	11.75
15:58394565:C:T	rs142650646	3	6861532	C	T	LOC118147781	intron_variant&non_coding_transcript_variant	8	168	0.047619	0	0	0.1667	0.04	Benign/Likely_benign	not_provided	GRM7	synonymous_variant	NO	11.75
15:61706829:G:A	rs35625434	3	10043144	G	A	FANCD2	missense_variant	4	168	0.0238095	0	0.06	0	0.02	Benign/Likely_benign	Fanconi_anemia_complementation_group_D2|Fanconi_anemia|not_specified|not_provided	FANCD2	missense_variant	YES	5.08
15:62689043:C:T	rs138166453	3	11026280	C	T	SLC6A1	synonymous_variant	3	168	0.0178571	0.0625	0	0	0.02	Benign/Likely_benign	Myoclonic-atonic_epilepsy|Inborn_genetic_diseases|not_provided	SLC6A1	synonymous_variant	YES	7.75
15:65448046:A:G	rs367697256	3	13854703	G	A	WNT7A	synonymous_variant	164	168	0.97619	0	0.06	0	0.02	Benign/Likely_benign	not_specified|not_provided	WNT7A	synonymous_variant	YES	6.752
15:67100608:G:A	rs202215179	3	129533923	C	T	RHO	3_prime_UTR_variant	3	168	0.0178571	0	0	0.0833	0	Benign/Likely_benign	Retinitis_pigmentosa|Congenital_stationary_night_blindness_autosomal_dominant_1	RHO	3_prime_UTR_variant	YES	1.69
15:68563547:T:C	.	3	128067979	G	A	SEC61A1	splice_region_variant&intron_variant	161	168	0.958333	0.0625	0.06	0	0.04	Benign/Likely_benign	not_provided	RUVBL1	intron_variant	NO	0.501
15:73870710:C:T	rs199521089	3	123682214	G	A	LOC118147712	intron_variant&non_coding_transcript_variant	67	168	0.39881	0.3438	0.52	0.3333	0.36	Benign/Likely_benign	Aortic_aneurysm,_familial_thoracic_7|not_specified	MYLK	intron_variant	NO	0.876
15:73870710:C:T	rs199521089	3	123682214	G	A	MYLK	intron_variant	67	168	0.39881	0.3438	0.52	0.3333	0.36	Benign/Likely_benign	Aortic_aneurysm,_familial_thoracic_7|not_specified	MYLK	intron_variant	YES	0.876
15:73923447:T:C	rs756699701	3	123638112	G	A	MYLK	synonymous_variant	77	168	0.458333	0.5625	0.58	0.3611	0.62	Benign/Likely_benign	Aortic_aneurysm,_familial_thoracic_7|not_specified|not_provided	MYLK	synonymous_variant	YES	0.605
16:13133470:G:A	rs60059260	8	58498325	A	G	CYP7A1	synonymous_variant	157	168	0.934524	0.0313	0.04	0.0833	0.1	Benign/Likely_benign	not_provided	CYP7A1	synonymous_variant	YES	3.753
16:15349221:G:A	rs148517660	8	60865600	G	A	CHD7	synonymous_variant	10	168	0.0595238	0.0313	0.12	0	0.06	Benign/Likely_benign	CHARGE_association|Hypogonadotropic_hypogonadism_5_with_or_without_anosmia|Inborn_genetic_diseases|not_specified|not_provided	CHD7	synonymous_variant	YES	3.694
17:62147567:A:G	rs764720370	3	30672197	G	A	TGFBR2	synonymous_variant	123	168	0.732143	0.125	0.26	0.4167	0.26	Benign/Likely_benign	Familial_thoracic_aortic_aneurysm_and_aortic_dissection|not_specified	TGFBR2	synonymous_variant	YES	0.09
17:69669178:T:C	rs376826051	3	38550660	C	T	LOC118148762	downstream_gene_variant	150	168	0.892857	0.0313	0.2	0.1111	0.06	Benign/Likely_benign	Cardiac_arrhythmia|Brugada_syndrome|not_specified|Cardiovascular_phenotype|not_provided	SCN5A	synonymous_variant	NO	0.144
17:69669178:T:C	rs376826051	3	38550660	C	T	SCN5A	synonymous_variant	150	168	0.892857	0.0313	0.2	0.1111	0.06	Benign/Likely_benign	Cardiac_arrhythmia|Brugada_syndrome|not_specified|Cardiovascular_phenotype|not_provided	SCN5A	synonymous_variant	YES	0.144
17:69674870:G:A	rs200556220	3	38556576	A	G	SCN5A	splice_region_variant&synonymous_variant	166	168	0.988095	0	0.02	0	0.02	Benign/Likely_benign	Cardiac_arrhythmia|Brugada_syndrome|not_specified|Cardiovascular_phenotype	SCN5A	synonymous_variant	NO	0.102
17:69681130:C:T	rs764462471	3	38562466	C	T	SCN5A	synonymous_variant	23	168	0.136905	0.0625	0.1	0.3333	0.08	Benign/Likely_benign	Cardiac_arrhythmia|Brugada_syndrome|not_specified|Cardiovascular_phenotype	SCN5A	synonymous_variant	YES	0.327
17:69717246:G:A	.	3	38597921	G	A	SCN5A	synonymous_variant	8	168	0.047619	0.0625	0.04	0	0.08	Benign/Likely_benign	Brugada_syndrome|not_provided	SCN5A	synonymous_variant	YES	0.388
17:69743117:A:G	rs199996750	3	38622429	G	A	SCN5A	synonymous_variant	110	168	0.654762	0.375	0.3	0.3333	0.38	Benign/Likely_benign	Cardiac_arrhythmia|Brugada_syndrome|Cardiovascular_phenotype|not_provided	SCN5A	synonymous_variant	YES	6.113
17:69753308:C:T	rs6599230	3	38633221	T	C	SCN5A	synonymous_variant	165	168	0.982143	0	0.06	0	0	Benign/Likely_benign	Cardiac_arrhythmia|Progressive_familial_heart_block,_type_1A|Brugada_syndrome_1|Dilated_cardiomyopathy_1E|Ventricular_fibrillation,_paroxysmal_familial,_type_1|Long_QT_syndrome_3|Brugada_syndrome|Congenital_long_QT_syndrome|Sick_sinus_syndrome_1|not_specified|Cardiovascular_phenotype|not_provided	SCN5A	synonymous_variant	YES	0.245
17:70038443:C:T	rs138034948	3	38909187	C	T	SCN11A	missense_variant	1	168	0.00595238	0	0.02	0	0	Benign/Likely_benign	Hereditary_sensory_and_autonomic_neuropathy_type_7|Familial_episodic_pain_syndrome_with_predominantly_lower_limb_involvement|Inborn_genetic_diseases	SCN11A	missense_variant	YES	13.23
18:13574636:C:T	rs17375748	1	160040361	C	T	KCNJ10	3_prime_UTR_variant	2	168	0.0119048	0	0	0.0556	0	Benign/Likely_benign	Autosomal_recessive_nonsyndromic_hearing_loss_4|EAST_syndrome	KCNJ10	3_prime_UTR_variant	YES	1.546
18:33621523:G:A	.	1	181733543	G	A	CACNA1E	missense_variant	1	168	0.00595238	0	0	0	0.02	Benign/Likely_benign	not_provided	CACNA1E	missense_variant	YES	1.158
18:4772410:C:T	rs142053610	1	151342658	C	T	RFX5	missense_variant	5	168	0.0297619	0.0938	0.04	0	0	Benign/Likely_benign	MHC_class_II_deficiency	RFX5	missense_variant	YES	15.91
1:90314795:C:T	rs370523728	9	72772493	G	A	TMC1	synonymous_variant	101	168	0.60119	0.7813	0.6	0.5278	0.54	Benign/Likely_benign	not_specified|not_provided	TMC1	synonymous_variant	YES	4.007
19:32269411:G:A	rs17006843	1	207767783	G	A	CD46	intron_variant	7	168	0.0416667	0	0.08	0	0.06	Benign/Likely_benign	Kidney_disease|Atypical_hemolytic-uremic_syndrome_with_MCP/CD46_anomaly|not_specified|not_provided	CD46	synonymous_variant,intron_variant	YES	1.575
19:32269411:G:A	rs17006843	1	207767783	G	A	CD46	synonymous_variant	7	168	0.0416667	0	0.08	0	0.06	Benign/Likely_benign	Kidney_disease|Atypical_hemolytic-uremic_syndrome_with_MCP/CD46_anomaly|not_specified|not_provided	CD46	synonymous_variant,intron_variant	YES	1.575
19:36372449:T:C	rs114058903	1	228283217	C	T	OBSCN	synonymous_variant	98	168	0.583333	0.7813	0.3	0.1944	0.46	Benign/Likely_benign	Inborn_genetic_diseases|not_provided	OBSCN	synonymous_variant	YES	1.288
19:36378198:A:G	rs79290523	1	228287893	G	A	OBSCN	synonymous_variant	119	168	0.708333	0.375	0.22	0.1944	0.38	Benign/Likely_benign	Inborn_genetic_diseases|not_provided	OBSCN	synonymous_variant	YES	0.112
19:36407612:A:G	rs372827129	1	228316785	G	A	OBSCN	synonymous_variant	107	168	0.636905	0.375	0.26	0.3056	0.5	Benign/Likely_benign	Inborn_genetic_diseases|not_provided	OBSCN	synonymous_variant	YES	0.305
19:36422948:G:A	rs56015866	1	228333294	G	A	OBSCN	missense_variant	29	168	0.172619	0.1875	0.16	0.25	0.12	Benign/Likely_benign	Inborn_genetic_diseases|not_provided	OBSCN	missense_variant	YES	16.66
19:36445463:G:A	rs114510676	1	228360743	G	A	OBSCN	intron_variant	4	168	0.0238095	0	0	0	0.08	Benign/Likely_benign	Inborn_genetic_diseases|not_provided	OBSCN	synonymous_variant,intron_variant	YES	0.363
19:36445463:G:A	rs114510676	1	228360743	G	A	OBSCN	synonymous_variant	4	168	0.0238095	0	0	0	0.08	Benign/Likely_benign	Inborn_genetic_diseases|not_provided	OBSCN	synonymous_variant,intron_variant	YES	0.363
21:12155794:G:A	rs193074572	3	81499145	C	T	GBE1	intron_variant&non_coding_transcript_variant	14	168	0.0833333	0	0	0.0556	0.24	Benign/Likely_benign	Glycogen_storage_disease,_type_IV|Adult_polyglucosan_body_disease|Glycogen_storage_disease_IV,_classic_hepatic|not_specified|not_provided	GBE1	missense_variant	NO	12.3
21:12155794:G:A	rs193074572	3	81499145	C	T	GBE1	missense_variant	14	168	0.0833333	0	0	0.0556	0.24	Benign/Likely_benign	Glycogen_storage_disease,_type_IV|Adult_polyglucosan_body_disease|Glycogen_storage_disease_IV,_classic_hepatic|not_specified|not_provided	GBE1	missense_variant	YES	12.3
2:139651687:A:G	rs706713	5	68226894	C	T	PIK3R1	synonymous_variant	80	168	0.47619	0.625	0.64	0.5278	0.34	Benign/Likely_benign	SHORT_syndrome|Agammaglobulinemia_7,_autosomal_recessive|Immunodeficiency_36|not_specified|not_provided	PIK3R1	synonymous_variant	YES	0.35
21:41645238:G:A	rs370117126	21	36756577	G	A	HLCS	synonymous_variant	5	168	0.0297619	0.0938	0	0	0.04	Benign/Likely_benign	Holocarboxylase_synthetase_deficiency|not_specified	HLCS	non-coding_transcript_variant,synonymous_variant	YES	0.643
21:41806008:C:T	rs111603166	21	36930254	C	T	HLCS	synonymous_variant	5	168	0.0297619	0.0938	0	0	0.04	Benign/Likely_benign	Holocarboxylase_synthetase_deficiency|not_provided	HLCS	non-coding_transcript_variant,synonymous_variant	YES	0.284
21:42322538:A:G	rs201001986	21	37478174	A	G	DYRK1A	intron_variant	1	168	0.00595238	0	0	0	0.02	Benign/Likely_benign	DYRK1A-related_intellectual_disability_syndrome|not_specified	DYRK1A	intron_variant	YES	11.05
21:42322538:A:G	rs201001986	21	37478174	A	G	DYRK1A	splice_region_variant&intron_variant	1	168	0.00595238	0	0	0	0.02	Benign/Likely_benign	DYRK1A-related_intellectual_disability_syndrome|not_specified	DYRK1A	intron_variant	NO	11.05
21:50435026:T:C	rs61751027	21	45986676	C	T	COL6A1	synonymous_variant	92	168	0.547619	0.4375	0.5	0.5278	0.36	Benign/Likely_benign	Bethlem_myopathy_1|Collagen_6-related_myopathy|not_specified|not_provided	COL6A1	synonymous_variant	YES	0.675
21:50435348:A:G	rs115292913	21	45987000	G	A	COL6A1	synonymous_variant	92	168	0.547619	0.4375	0.5	0.5278	0.36	Benign/Likely_benign	Bethlem_myopathy_1|Collagen_6-related_myopathy|not_specified	COL6A1	synonymous_variant	YES	0.872
21:50436033:C:T	rs144843800	21	45987481	C	T	COL6A1	intron_variant	76	168	0.452381	0.4375	0.5	0.5278	0.36	Benign/Likely_benign	Bethlem_myopathy_1|not_specified	COL6A1	intron_variant	YES	2.375
21:50448981:G:A	rs141892165	21	45998887	G	A	COL6A1	intron_variant	24	168	0.142857	0.1563	0.1	0.1944	0.14	Benign/Likely_benign	Bethlem_myopathy_1|Collagen_6-related_myopathy|not_specified	COL6A1	intron_variant	YES	0.509
21:50452122:G:A	rs147219060	21	46002281	G	A	COL6A1	synonymous_variant	12	168	0.0714286	0.2813	0	0	0.06	Benign/Likely_benign	Bethlem_myopathy_1|Collagen_6-related_myopathy|not_specified|not_provided	COL6A1	synonymous_variant	YES	1.336
21:50564054:T:C	rs138312213	21	46112346	C	T	COL6A2	synonymous_variant	124	168	0.738095	0.3438	0.28	0.1667	0.26	Benign/Likely_benign	Myosclerosis|Bethlem_myopathy_1|Collagen_6-related_myopathy|not_specified|not_provided	COL6A2	synonymous_variant	YES	6.492
21:50863268:C:T	rs575313866	21	46411888	C	T	LOC118149936	intron_variant&non_coding_transcript_variant	3	168	0.0178571	0	0	0.0278	0.04	Benign/Likely_benign	Microcephalic_osteodysplastic_primordial_dwarfism_type_II|not_specified|not_provided	PCNT	missense_variant	NO	16.48
21:50863268:C:T	rs575313866	21	46411888	C	T	PCNT	missense_variant	3	168	0.0178571	0	0	0.0278	0.04	Benign/Likely_benign	Microcephalic_osteodysplastic_primordial_dwarfism_type_II|not_specified|not_provided	PCNT	missense_variant	YES	16.48
2:1601537:T:C	rs75300185	7	66092577	C	T	ASL	synonymous_variant	167	168	0.994048	0.0313	0	0	0	Benign/Likely_benign	Argininosuccinate_lyase_deficiency|not_specified|not_provided	ASL	synonymous_variant	YES	0.636
2:166871822:C:T	rs201036501	5	37064562	G	A	NIPBL	3_prime_UTR_variant	1	168	0.00595238	0	0.02	0	0	Benign/Likely_benign	Cornelia_de_Lange_syndrome_1|Inborn_genetic_diseases	NIPBL	synonymous_variant,3_prime_UTR_variant	YES	9.096
2:166871822:C:T	rs201036501	5	37064562	G	A	NIPBL	synonymous_variant	1	168	0.00595238	0	0.02	0	0	Benign/Likely_benign	Cornelia_de_Lange_syndrome_1|Inborn_genetic_diseases	NIPBL	synonymous_variant,3_prime_UTR_variant	YES	9.096
2:169709571:C:T	rs113928135	5	33954352	G	A	SLC45A2	intron_variant	125	168	0.744048	0.9063	0.6	0.8889	0.68	Benign/Likely_benign	Oculocutaneous_albinism_type_4|not_provided	SLC45A2	intron_variant	YES	0.852
22:1049774:T:C	rs2074899	19	1397505	C	T	GAMT	3_prime_UTR_variant	68	168	0.404762	0.4688	0.62	0.2778	0.88	Benign/Likely_benign	Cerebral_creatine_deficiency_syndrome|Leigh_syndrome|Deficiency_of_guanidinoacetate_methyltransferase|Mitochondrial_complex_I_deficiency|not_specified|not_provided	GAMT	intron_variant	NO	2.465
22:1049774:T:C	rs2074899	19	1397505	C	T	GAMT	splice_region_variant&intron_variant	68	168	0.404762	0.4688	0.62	0.2778	0.88	Benign/Likely_benign	Cerebral_creatine_deficiency_syndrome|Leigh_syndrome|Deficiency_of_guanidinoacetate_methyltransferase|Mitochondrial_complex_I_deficiency|not_specified|not_provided	GAMT	intron_variant	NO	2.465
22:1049774:T:C	rs2074899	19	1397505	C	T	NDUFS7	downstream_gene_variant	68	168	0.404762	0.4688	0.62	0.2778	0.88	Benign/Likely_benign	Cerebral_creatine_deficiency_syndrome|Leigh_syndrome|Deficiency_of_guanidinoacetate_methyltransferase|Mitochondrial_complex_I_deficiency|not_specified|not_provided	GAMT	intron_variant	NO	2.465
22:11906024:G:A	rs372812865	19	13359696	G	A	CACNA1A	synonymous_variant	67	168	0.39881	0.3438	0.38	0.5	0.38	Benign/Likely_benign	Episodic_ataxia_type_2|Developmental_and_epileptic_encephalopathy,_42|Inborn_genetic_diseases|not_specified|not_provided	CACNA1A	synonymous_variant	YES	0.478
22:13911679:G:A	.	19	15180100	C	T	NOTCH3	missense_variant	1	168	0.00595238	0	0.02	0	0	Benign/Likely_benign	not_provided	NOTCH3	missense_variant	YES	14.06
22:13922090:G:A	rs756495084	19	15167327	C	T	NOTCH3	missense_variant	42	168	0.25	0.4063	0.24	0.1667	0.22	Benign/Likely_benign	not_specified|not_provided	NOTCH3	missense_variant	YES	8.096
22:31343226:C:T	rs373809858	19	35032707	C	T	SCN1B	intron_variant	1	168	0.00595238	0	0	0.0278	0	Benign/Likely_benign	Brugada_syndrome_5|not_specified	SCN1B	intron_variant	YES	9.002
22:33983808:G:A	rs2229140	19	38448427	G	A	RYR1	synonymous_variant	5	168	0.0297619	0	0.06	0.0278	0.02	Benign/Likely_benign	Congenital_multicore_myopathy_with_external_ophthalmoplegia|Central_core_myopathy|Malignant_hyperthermia,_susceptibility_to,_1|Neuromuscular_disease,_congenital,_with_uniform_type_1_fiber|not_specified|RYR1-Related_Disorders|not_provided	RYR1	synonymous_variant	YES	0.541
22:33998175:A:G	rs149381996	19	38463467	G	A	RYR1	synonymous_variant	158	168	0.940476	0.125	0.08	0	0.04	Benign/Likely_benign	not_specified|RYR1-Related_Disorders|not_provided	RYR1	synonymous_variant	YES	0.773
22:34000736:C:T	rs139363830	19	38466139	C	T	RYR1	synonymous_variant	1	168	0.00595238	0	0	0.0278	0	Benign/Likely_benign	Congenital_multicore_myopathy_with_external_ophthalmoplegia|Central_core_myopathy|Malignant_hyperthermia,_susceptibility_to,_1|Neuromuscular_disease,_congenital,_with_uniform_type_1_fiber|not_specified|RYR1-Related_Disorders|not_provided	RYR1	synonymous_variant	YES	0.894
22:39269993:T:C	rs571269735	19	45179662	C	T	BLOC1S3	synonymous_variant	165	168	0.982143	0.0938	0	0	0	Benign/Likely_benign	not_specified|not_provided	BLOC1S3	synonymous_variant	YES	10.09
22:39269993:T:C	rs571269735	19	45179662	C	T	TRAPPC6A	upstream_gene_variant	165	168	0.982143	0.0938	0	0	0	Benign/Likely_benign	not_specified|not_provided	BLOC1S3	synonymous_variant	NO	10.09
22:39428662:G:A	rs148319713	19	45352806	G	A	ERCC2	non_coding_transcript_exon_variant	11	168	0.0654762	0	0.06	0.1944	0.02	Benign/Likely_benign	Xeroderma_pigmentosum|Inborn_genetic_diseases|not_provided	ERCC2	synonymous_variant	NO	2.976
22:39428662:G:A	rs148319713	19	45352806	G	A	ERCC2	synonymous_variant	11	168	0.0654762	0	0.06	0.1944	0.02	Benign/Likely_benign	Xeroderma_pigmentosum|Inborn_genetic_diseases|not_provided	ERCC2	synonymous_variant	YES	2.976
22:39428662:G:A	rs148319713	19	45352806	G	A	KLC3	downstream_gene_variant	11	168	0.0654762	0	0.06	0.1944	0.02	Benign/Likely_benign	Xeroderma_pigmentosum|Inborn_genetic_diseases|not_provided	ERCC2	synonymous_variant	NO	2.976
22:39429155:G:A	rs3916876	19	45353263	G	A	ERCC2	non_coding_transcript_exon_variant	4	168	0.0238095	0.125	0	0	0	Benign/Likely_benign	Xeroderma_pigmentosum,_group_D|Inborn_genetic_diseases|not_specified|not_provided	ERCC2	synonymous_variant	NO	0.53
22:39429155:G:A	rs3916876	19	45353263	G	A	ERCC2	synonymous_variant	4	168	0.0238095	0.125	0	0	0	Benign/Likely_benign	Xeroderma_pigmentosum,_group_D|Inborn_genetic_diseases|not_specified|not_provided	ERCC2	synonymous_variant	YES	0.53
22:39429155:G:A	rs3916876	19	45353263	G	A	KLC3	downstream_gene_variant	4	168	0.0238095	0.125	0	0	0	Benign/Likely_benign	Xeroderma_pigmentosum,_group_D|Inborn_genetic_diseases|not_specified|not_provided	ERCC2	synonymous_variant	NO	0.53
22:42875579:G:A	rs142788545	19	49168558	G	A	TRPM4	non_coding_transcript_exon_variant	10	168	0.0595238	0.1875	0.02	0.0833	0	Benign/Likely_benign	Progressive_familial_heart_block_type_IB|not_specified|Cardiovascular_phenotype	TRPM4	synonymous_variant,5_prime_UTR_variant	NO	0.129
22:42875579:G:A	rs142788545	19	49168558	G	A	TRPM4	synonymous_variant	10	168	0.0595238	0.1875	0.02	0.0833	0	Benign/Likely_benign	Progressive_familial_heart_block_type_IB|not_specified|Cardiovascular_phenotype	TRPM4	synonymous_variant,5_prime_UTR_variant	YES	0.129
22:42875579:G:A	rs142788545	19	49168558	G	A	TRPM4	upstream_gene_variant	10	168	0.0595238	0.1875	0.02	0.0833	0	Benign/Likely_benign	Progressive_familial_heart_block_type_IB|not_specified|Cardiovascular_phenotype	TRPM4	synonymous_variant,5_prime_UTR_variant	NO	0.129
22:42879403:A:G	rs577738761	19	49171655	G	A	TRPM4	5_prime_UTR_variant	118	168	0.702381	0.4688	0.18	0.3333	0.28	Benign/Likely_benign	Progressive_familial_heart_block_type_IB|Cardiovascular_phenotype|not_provided	TRPM4	synonymous_variant,5_prime_UTR_variant	YES	0.299
22:42879403:A:G	rs577738761	19	49171655	G	A	TRPM4	non_coding_transcript_exon_variant	118	168	0.702381	0.4688	0.18	0.3333	0.28	Benign/Likely_benign	Progressive_familial_heart_block_type_IB|Cardiovascular_phenotype|not_provided	TRPM4	synonymous_variant,5_prime_UTR_variant	NO	0.299
22:42879403:A:G	rs577738761	19	49171655	G	A	TRPM4	synonymous_variant	118	168	0.702381	0.4688	0.18	0.3333	0.28	Benign/Likely_benign	Progressive_familial_heart_block_type_IB|Cardiovascular_phenotype|not_provided	TRPM4	synonymous_variant,5_prime_UTR_variant	YES	0.299
22:42879403:A:G	rs577738761	19	49171655	G	A	TRPM4	upstream_gene_variant	118	168	0.702381	0.4688	0.18	0.3333	0.28	Benign/Likely_benign	Progressive_familial_heart_block_type_IB|Cardiovascular_phenotype|not_provided	TRPM4	synonymous_variant,5_prime_UTR_variant	NO	0.299
22:43869373:C:T	rs768413723	19	50309643	C	T	KCNC3	downstream_gene_variant	54	168	0.321429	0.375	0.3	0.3056	0.32	Benign/Likely_benign	not_provided	MYH14	synonymous_variant	NO	1.703
22:43869373:C:T	rs768413723	19	50309643	C	T	MYH14	synonymous_variant	54	168	0.321429	0.375	0.3	0.3056	0.32	Benign/Likely_benign	not_provided	MYH14	synonymous_variant	YES	1.703
22:43969257:T:C	rs143974331	19	50416407	C	T	POLD1	synonymous_variant	165	168	0.982143	0.0625	0.02	0	0	Benign/Likely_benign	Colorectal_cancer,_susceptibility_to,_10|Hereditary_cancer-predisposing_syndrome|not_provided	POLD1	non-coding_transcript_variant,synonymous_variant	YES	6.501
22:43969257:T:C	rs143974331	19	50416407	C	T	SPIB	upstream_gene_variant	165	168	0.982143	0.0625	0.02	0	0	Benign/Likely_benign	Colorectal_cancer,_susceptibility_to,_10|Hereditary_cancer-predisposing_syndrome|not_provided	POLD1	non-coding_transcript_variant,synonymous_variant	NO	6.501
22:43970024:T:C	rs2272323	19	50417157	C	T	POLD1	intron_variant	58	168	0.345238	0.7188	0.64	0.6944	0.6	Benign/Likely_benign	Colorectal_cancer,_susceptibility_to,_10|not_specified	POLD1	intron_variant	YES	6.899
22:43970024:T:C	rs2272323	19	50417157	C	T	SPIB	upstream_gene_variant	58	168	0.345238	0.7188	0.64	0.6944	0.6	Benign/Likely_benign	Colorectal_cancer,_susceptibility_to,_10|not_specified	POLD1	intron_variant	NO	6.899
22:47054905:C:T	rs146368839	19	53798385	C	T	NLRP12	missense_variant	13	168	0.077381	0.125	0.08	0.0833	0.04	Benign/Likely_benign	Familial_cold_autoinflammatory_syndrome_2|not_provided	NLRP12	missense_variant,intron_variant	YES	17.74
22:874875:C:A	rs368466538	19	1226570	C	A	LOC100391177	downstream_gene_variant	148	168	0.880952	0.8125	0.84	0.8611	0.98	Benign/Likely_benign	Peutz-Jeghers_syndrome|not_specified	STK11	synonymous_variant	NO	5.513
22:874875:C:A	rs368466538	19	1226570	C	A	LOC118150166	downstream_gene_variant	148	168	0.880952	0.8125	0.84	0.8611	0.98	Benign/Likely_benign	Peutz-Jeghers_syndrome|not_specified	STK11	synonymous_variant	NO	5.513
22:874875:C:A	rs368466538	19	1226570	C	A	STK11	non_coding_transcript_exon_variant	148	168	0.880952	0.8125	0.84	0.8611	0.98	Benign/Likely_benign	Peutz-Jeghers_syndrome|not_specified	STK11	synonymous_variant	NO	5.513
22:874875:C:A	rs368466538	19	1226570	C	A	STK11	synonymous_variant	148	168	0.880952	0.8125	0.84	0.8611	0.98	Benign/Likely_benign	Peutz-Jeghers_syndrome|not_specified	STK11	synonymous_variant	YES	5.513
22:9075278:G:A	rs374476495	19	10154302	G	A	DNMT1	synonymous_variant	4	168	0.0238095	0	0	0.0278	0.06	Benign/Likely_benign	Hereditary_sensory_neuropathy-deafness-dementia_syndrome|not_provided	DNMT1	synonymous_variant	YES	1.928
22:9922273:T:C	rs148495641	19	11034176	C	T	SMARCA4	synonymous_variant	166	168	0.988095	0	0	0	0.04	Benign/Likely_benign	Rhabdoid_tumor_predisposition_syndrome_2|Intellectual_disability,_autosomal_dominant_16|Hereditary_cancer-predisposing_syndrome|Coffin-Siris_syndrome|not_provided	SMARCA4	non-coding_transcript_variant,synonymous_variant	YES	0.22
2:35663153:C:T	rs192255604	5	138947271	C	T	SIL1	missense_variant	24	168	0.142857	0.1563	0.12	0.2222	0.1	Benign/Likely_benign	Marinesco-Sjgren_syndrome|not_specified|not_provided	SIL1	missense_variant	YES	3.912
2:45027859:C:T	rs142558269	5	148095825	C	T	SPINK5	missense_variant	7	168	0.0416667	0.0938	0	0.0556	0.04	Benign/Likely_benign	Susceptibility_to_nonsyndromic_otitis_media|Netherton_syndrome|not_provided	SPINK5	missense_variant	YES	23.5
2:46014663:A:G	rs79738100	5	149004664	G	A	SH3TC2	3_prime_UTR_variant	72	168	0.428571	0.5	0.68	0.6111	0.48	Benign/Likely_benign	Charcot-Marie-Tooth_disease_type_4C|Susceptibility_to_mononeuropathy_of_the_median_nerve,_mild|not_provided	SH3TC2	3_prime_UTR_variant	YES	3.429
2:46014663:A:G	rs79738100	5	149004664	G	A	SH3TC2	downstream_gene_variant	72	168	0.428571	0.5	0.68	0.6111	0.48	Benign/Likely_benign	Charcot-Marie-Tooth_disease_type_4C|Susceptibility_to_mononeuropathy_of_the_median_nerve,_mild|not_provided	SH3TC2	3_prime_UTR_variant	NO	3.429
2:46038866:C:T	rs140904010	5	149028433	C	T	SH3TC2	synonymous_variant	1	168	0.00595238	0	0	0.0278	0	Benign/Likely_benign	Charcot-Marie-Tooth_disease|Charcot-Marie-Tooth_disease_type_4|Inborn_genetic_diseases|not_specified|not_provided	SH3TC2	synonymous_variant	YES	0.039
2:46957814:G:A	rs75319698	5	149914932	G	A	PDE6A	intron_variant	9	168	0.0535714	0.0938	0	0.1667	0	Benign/Likely_benign	Retinitis_pigmentosa|not_specified|not_provided	PDE6A	intron_variant	YES	7.277
2:60655193:G:A	rs140198889	5	170082849	G	A	DOCK2	synonymous_variant	3	168	0.0178571	0	0	0.0833	0	Benign/Likely_benign	DOCK2_deficiency|not_provided	DOCK2	non-coding_transcript_variant,synonymous_variant	YES	0.054
2:71097385:C:T	rs76704342	5	179273003	G	A	ADAMTS2	missense_variant	4	168	0.0238095	0	0	0.1111	0	Benign/Likely_benign	Ehlers-Danlos_syndrome,_dermatosparaxis_type|Ehlers-Danlos_syndrome|not_provided	ADAMTS2	missense_variant	YES	13.7
2:79070165:T:C	rs374456115	5	128289191	G	A	FBN2	synonymous_variant	137	168	0.815476	0.3125	0.14	0.1667	0.16	Benign/Likely_benign	Congenital_contractural_arachnodactyly|not_provided	FBN2	synonymous_variant	YES	0.019
2:79906630:T:C	rs56157640	5	127455564	G	A	MEGF10	synonymous_variant	109	168	0.64881	0.5625	0.32	0.4167	0.2	Benign/Likely_benign	MEGF10-Related_Myopathy|not_specified	MEGF10	synonymous_variant	YES	5.119
2:9241743:G:A	rs72555510	7	75981559	G	A	LOC100406157	synonymous_variant	15	168	0.0892857	0.1563	0.02	0.0556	0.14	Benign/Likely_benign	Congenital_adrenal_hyperplasia_due_to_cytochrome_P450_oxidoreductase_deficiency|not_provided	POR	synonymous_variant	NO	1.7
2:95480158:G:A	rs187297940	5	112841729	C	T	APC	synonymous_variant	7	168	0.0416667	0.1563	0.04	0	0	Benign/Likely_benign	Carcinoma_of_colon|Hereditary_cancer-predisposing_syndrome|Familial_adenomatous_polyposis_1|not_specified|not_provided	APC	synonymous_variant	YES	4.243
3:112922049:G:C	rs368088450	4	83485040	C	G	ABRAXAS1	5_prime_UTR_variant	2	168	0.0119048	0	0.04	0	0	Benign/Likely_benign	Hereditary_cancer-predisposing_syndrome|not_specified|not_provided	ABRAXAS1	synonymous_variant,5_prime_UTR_variant	YES	5.462
3:112922049:G:C	rs368088450	4	83485040	C	G	ABRAXAS1	synonymous_variant	2	168	0.0119048	0	0.04	0	0	Benign/Likely_benign	Hereditary_cancer-predisposing_syndrome|not_specified|not_provided	ABRAXAS1	synonymous_variant,5_prime_UTR_variant	YES	5.462
3:112922049:G:C	rs368088450	4	83485040	C	G	ABRAXAS1	upstream_gene_variant	2	168	0.0119048	0	0.04	0	0	Benign/Likely_benign	Hereditary_cancer-predisposing_syndrome|not_specified|not_provided	ABRAXAS1	synonymous_variant,5_prime_UTR_variant	NO	5.462
3:140774013:A:G	rs72549293	4	54709427	C	T	KIT	synonymous_variant	166	168	0.988095	0.0313	0	0	0.02	Benign/Likely_benign	Partial_albinism|Mastocytosis|Gastrointestinal_stromal_tumor|Hereditary_cancer-predisposing_syndrome|not_specified	KIT	synonymous_variant	YES	0.894
3:153062832:G:A	rs146030265	4	39470130	C	T	LIAS	synonymous_variant	51	168	0.303571	0.3438	0.26	0.3611	0.28	Benign/Likely_benign	Lipoic_acid_synthetase_deficiency|not_provided	LIAS	synonymous_variant	YES	9.655
3:182717929:C:T	.	4	10078948	G	A	WDR1	synonymous_variant	14	168	0.0833333	0	0.06	0.2222	0.06	Benign/Likely_benign	not_provided	WDR1	synonymous_variant	YES	1.192
3:184728632:G:A	rs142897994	4	5797130	G	A	EVC	synonymous_variant	15	168	0.0892857	0	0.14	0.1944	0.02	Benign/Likely_benign	Curry-Hall_syndrome|Ellis-van_Creveld_syndrome	EVC	synonymous_variant	YES	0.84
3:185235067:A:G	rs115346085	4	6291218	G	A	WFS1	missense_variant	123	168	0.732143	0.4063	0.28	0.2222	0.2	Benign/Likely_benign	Wolfram_syndrome_1|Autosomal_dominant_nonsyndromic_hearing_loss_6|Wolfram-like_syndrome|not_specified|WFS1-Related_Spectrum_Disorders|not_provided	WFS1	missense_variant	YES	0.195
3:185235179:G:A	rs563931269	4	6291330	G	A	WFS1	synonymous_variant	18	168	0.107143	0.2188	0.06	0.1389	0.06	Benign/Likely_benign	not_specified|not_provided	WFS1	synonymous_variant	YES	2.065
3:188381340:G:A	rs372989037	4	3473494	C	T	DOK7	5_prime_UTR_variant	25	168	0.14881	0.0313	0.1	0.1667	0.26	Benign/Likely_benign	Fetal_akinesia_deformation_sequence_1|Congenital_myasthenic_syndrome_10|not_specified|not_provided	DOK7	synonymous_variant,intron_variant	NO	2.016
3:188381340:G:A	rs372989037	4	3473494	C	T	DOK7	synonymous_variant	25	168	0.14881	0.0313	0.1	0.1667	0.26	Benign/Likely_benign	Fetal_akinesia_deformation_sequence_1|Congenital_myasthenic_syndrome_10|not_specified|not_provided	DOK7	synonymous_variant,intron_variant	YES	2.016
3:190078830:G:A	rs142884145	4	1806603	C	T	FGFR3	synonymous_variant	11	168	0.0654762	0.1563	0.1	0.0278	0	Benign/Likely_benign	not_specified|not_provided	FGFR3	missense_variant,non-coding_transcript_variant,synonymous_variant	YES	1.615
3:190079238:A:G	rs371666188	4	1806181	C	T	FGFR3	splice_region_variant&intron_variant	167	168	0.994048	0.0313	0	0	0	Benign/Likely_benign	not_specified|not_provided	FGFR3	intron_variant	NO	0.3
3:191322818:C:T	rs75695239	4	654142	G	A	PDE6B	synonymous_variant	24	168	0.142857	0.0938	0.18	0.1667	0.12	Benign/Likely_benign	Retinitis_pigmentosa|Congenital_stationary_night_blindness_autosomal_dominant_2|not_specified|not_provided	PDE6B	synonymous_variant,5_prime_UTR_variant	YES	0.128
3:3391298:A:G	rs72716245	4	186597018	C	T	FAT1	non_coding_transcript_exon_variant	141	168	0.839286	0.125	0.1	0.25	0.18	Benign/Likely_benign	not_provided	FAT1	synonymous_variant	NO	0.023
3:3391298:A:G	rs72716245	4	186597018	C	T	FAT1	synonymous_variant	141	168	0.839286	0.125	0.1	0.25	0.18	Benign/Likely_benign	not_provided	FAT1	synonymous_variant	YES	0.023
3:4675807:G:A	rs150786764	4	185146830	G	A	SLC25A4	synonymous_variant	1	168	0.00595238	0	0	0	0.02	Benign/Likely_benign	Progressive_external_ophthalmoplegia_with_mitochondrial_DNA_deletions,_autosomal_dominant_2|not_specified|not_provided	SLC25A4	synonymous_variant	YES	4.573
3:75741896:G:A	rs116026637	4	120710405	C	T	PRDM5	missense_variant	1	168	0.00595238	0	0.02	0	0	Benign/Likely_benign	Ehlers-Danlos_syndrome|Cardiovascular_phenotype|not_provided	PRDM5	missense_variant,synonymous_variant,intron_variant	YES	0.994
3:75741896:G:A	rs116026637	4	120710405	C	T	PRDM5	synonymous_variant	1	168	0.00595238	0	0.02	0	0	Benign/Likely_benign	Ehlers-Danlos_syndrome|Cardiovascular_phenotype|not_provided	PRDM5	missense_variant,synonymous_variant,intron_variant	YES	0.994
3:77680564:G:T	rs28661939	4	118298754	C	A	PRSS12	missense_variant	3	168	0.0178571	0.0938	0	0	0	Benign/Likely_benign	not_specified|Intellectual_Disability,_Recessive|not_provided	PRSS12	missense_variant	YES	14.78
3:82522610:C:T	rs147423696	4	113359013	G	A	ANK2	intron_variant	2	168	0.0119048	0	0.02	0	0.02	Benign/Likely_benign	Long_QT_syndrome|Cardiac_arrhythmia,_ankyrin-B-related|not_specified|Cardiovascular_phenotype|not_provided	ANK2	synonymous_variant,intron_variant	YES	4.486
3:82522610:C:T	rs147423696	4	113359013	G	A	ANK2	synonymous_variant	2	168	0.0119048	0	0.02	0	0.02	Benign/Likely_benign	Long_QT_syndrome|Cardiac_arrhythmia,_ankyrin-B-related|not_specified|Cardiovascular_phenotype|not_provided	ANK2	synonymous_variant,intron_variant	YES	4.486
3:85975737:G:A	rs11569098	4	109999800	C	T	EGF	intron_variant	33	168	0.196429	0.0625	0.2	0.3333	0.18	Benign/Likely_benign	not_provided	EGF	missense_variant	NO	17.36
3:85975737:G:A	rs11569098	4	109999800	C	T	EGF	missense_variant	33	168	0.196429	0.0625	0.2	0.3333	0.18	Benign/Likely_benign	not_provided	EGF	missense_variant	YES	17.36
4:21125928:C:A	rs141227126	6	7580778	G	T	DSP	intron_variant	1	168	0.00595238	0	0.02	0	0	Benign/Likely_benign	Cardiomyopathy|Arrhythmogenic_cardiomyopathy_with_woolly_hair_and_keratoderma|Arrhythmogenic_right_ventricular_dysplasia_8|Skin_fragility-woolly_hair-palmoplantar_keratoderma_syndrome|Lethal_acantholytic_epidermolysis_bullosa|not_specified|Cardiovascular_phenotype|not_provided	DSP	missense_variant,intron_variant	YES	19.89
4:21125928:C:A	rs141227126	6	7580778	G	T	DSP	missense_variant	1	168	0.00595238	0	0.02	0	0	Benign/Likely_benign	Cardiomyopathy|Arrhythmogenic_cardiomyopathy_with_woolly_hair_and_keratoderma|Arrhythmogenic_right_ventricular_dysplasia_8|Skin_fragility-woolly_hair-palmoplantar_keratoderma_syndrome|Lethal_acantholytic_epidermolysis_bullosa|not_specified|Cardiovascular_phenotype|not_provided	DSP	missense_variant,intron_variant	YES	19.89
4:21126133:C:T	rs140029036	6	7580573	G	A	DSP	intron_variant	20	168	0.119048	0.375	0.12	0	0.04	Benign/Likely_benign	Cardiomyopathy|Arrhythmogenic_cardiomyopathy_with_woolly_hair_and_keratoderma|Arrhythmogenic_right_ventricular_dysplasia_8|Skin_fragility-woolly_hair-palmoplantar_keratoderma_syndrome|Lethal_acantholytic_epidermolysis_bullosa|not_specified|Cardiovascular_phenotype|not_provided	DSP	synonymous_variant,intron_variant	YES	5.346
4:21126133:C:T	rs140029036	6	7580573	G	A	DSP	synonymous_variant	20	168	0.119048	0.375	0.12	0	0.04	Benign/Likely_benign	Cardiomyopathy|Arrhythmogenic_cardiomyopathy_with_woolly_hair_and_keratoderma|Arrhythmogenic_right_ventricular_dysplasia_8|Skin_fragility-woolly_hair-palmoplantar_keratoderma_syndrome|Lethal_acantholytic_epidermolysis_bullosa|not_specified|Cardiovascular_phenotype|not_provided	DSP	synonymous_variant,intron_variant	YES	5.346
4:25734101:C:T	rs11550258	6	3154592	A	G	BPHL	downstream_gene_variant	133	168	0.791667	0.125	0.26	0.1389	0.26	Benign/Likely_benign	not_specified|not_provided	TUBB2A	synonymous_variant	NO	4.259
4:25734101:C:T	rs11550258	6	3154592	A	G	TUBB2A	synonymous_variant	133	168	0.791667	0.125	0.26	0.1389	0.26	Benign/Likely_benign	not_specified|not_provided	TUBB2A	synonymous_variant	YES	4.259
4:26807775:C:T	rs144895010	6	2948935	G	A	LOC108587750	synonymous_variant	70	168	0.416667	0.4063	0.42	0.4444	0.4	Benign/Likely_benign	not_specified|not_provided	SERPINB6	non-coding_transcript_variant,synonymous_variant	NO	5.437
4:32226428:C:T	rs200541066	6	29673620	C	T	LOC100402239	missense_variant	6	168	0.0357143	0	0.02	0.0278	0.08	Benign/Likely_benign	Diabetes_mellitus,_transient_neonatal,_1|Monogenic_diabetes|not_provided	ZFP57	missense_variant	NO	0.887
4:32226428:C:T	rs200541066	6	29673620	C	T	MOG	downstream_gene_variant	6	168	0.0357143	0	0.02	0.0278	0.08	Benign/Likely_benign	Diabetes_mellitus,_transient_neonatal,_1|Monogenic_diabetes|not_provided	ZFP57	missense_variant	NO	0.887
4:36253944:A:G	.	6	32049415	G	A	TNXB	synonymous_variant	163	168	0.970238	0	0	0	0.1	Benign/Likely_benign	Ehlers-Danlos_syndrome|Cardiovascular_phenotype|not_provided	TNXB	synonymous_variant	YES	0.046
4:47376866:T:C	rs3749920	6	42184595	T	C	GUCA1A	downstream_gene_variant	148	168	0.880952	0.8125	0.9	0.8611	0.92	Benign/Likely_benign	Retinitis_pigmentosa|Cone_dystrophy|Retinitis_Pigmentosa,_Dominant	GUCA1A	3_prime_UTR_variant	NO	1.95
4:47376866:T:C	rs3749920	6	42184595	T	C	GUCA1B	3_prime_UTR_variant	148	168	0.880952	0.8125	0.9	0.8611	0.92	Benign/Likely_benign	Retinitis_pigmentosa|Cone_dystrophy|Retinitis_Pigmentosa,_Dominant	GUCA1A	3_prime_UTR_variant	NO	1.95
4:48162125:C:T	rs770645870	6	42989654	C	T	PPP2R5D	missense_variant	11	168	0.0654762	0	0.04	0	0.18	Benign/Likely_benign	not_provided	PPP2R5D	missense_variant,5_prime_UTR_variant,intron_variant	YES	21.8
4:56816067:C:T	.	6	51836533	C	T	PKHD1	intron_variant	7	168	0.0416667	0.0938	0.06	0	0.02	Benign/Likely_benign	Polycystic_kidney_disease_4|not_provided	PKHD1	intron_variant	YES	0.203
4:99514320:G:A	rs139675421	6	96897691	G	A	LOC118152923	upstream_gene_variant	3	168	0.0178571	0	0.04	0	0.02	Benign/Likely_benign	Mitochondrial_complex_I_deficiency,_nuclear_type_1|not_specified|not_provided	NDUFAF4	synonymous_variant	NO	4.398
4:99514320:G:A	rs139675421	6	96897691	G	A	NDUFAF4	synonymous_variant	3	168	0.0178571	0	0.04	0	0.02	Benign/Likely_benign	Mitochondrial_complex_I_deficiency,_nuclear_type_1|not_specified|not_provided	NDUFAF4	synonymous_variant	YES	4.398
5:10531487:C:T	rs117106081	20	5302204	C	T	PROKR2	missense_variant	1	168	0.00595238	0	0	0	0.02	Benign/Likely_benign	Hypogonadotropic_hypogonadism_3_with_or_without_anosmia|not_specified|not_provided	PROKR2	missense_variant	YES	14.34
5:10538316:G:A	rs148596437	20	5313995	G	A	PROKR2	synonymous_variant	68	168	0.404762	0.375	0.56	0.3333	0.32	Benign/Likely_benign	Hypogonadotropic_hypogonadism_3_with_or_without_anosmia|not_provided	PROKR2	synonymous_variant	YES	4.824
5:120580598:C:T	rs146184566	17	42346617	C	T	STAT3	synonymous_variant	4	168	0.0238095	0	0	0.1111	0	Benign/Likely_benign	Hyper-IgE_recurrent_infection_syndrome_1|STAT3_gain_of_function|not_specified	STAT3	synonymous_variant	YES	9.018
5:122591313:C:A	rs111470596	17	65558186	G	T	AXIN2	synonymous_variant	1	168	0.00595238	0	0.02	0	0	Benign/Likely_benign	Oligodontia-cancer_predisposition_syndrome|Hereditary_cancer-predisposing_syndrome|not_provided	AXIN2	synonymous_variant	YES	9.16
5:122591313:C:A	rs111470596	17	65558186	G	T	CEP112	downstream_gene_variant	1	168	0.00595238	0	0.02	0	0	Benign/Likely_benign	Oligodontia-cancer_predisposition_syndrome|Hereditary_cancer-predisposing_syndrome|not_provided	AXIN2	synonymous_variant	NO	9.16
5:122591400:G:T	rs780914406	17	65558099	C	A	AXIN2	synonymous_variant	1	168	0.00595238	0	0.02	0	0	Benign/Likely_benign	Oligodontia-cancer_predisposition_syndrome|Hereditary_cancer-predisposing_syndrome	AXIN2	synonymous_variant	YES	3.221
5:122591400:G:T	rs780914406	17	65558099	C	A	CEP112	downstream_gene_variant	1	168	0.00595238	0	0.02	0	0	Benign/Likely_benign	Oligodontia-cancer_predisposition_syndrome|Hereditary_cancer-predisposing_syndrome	AXIN2	synonymous_variant	NO	3.221
5:122613098:C:T	rs138287857	17	65536410	G	A	AXIN2	missense_variant	1	168	0.00595238	0	0.02	0	0	Benign/Likely_benign	Aganglionic_megacolon|Colorectal_cancer|Oligodontia-cancer_predisposition_syndrome|Hereditary_cancer-predisposing_syndrome|not_specified|not_provided	AXIN2	missense_variant	YES	24.4
5:125014148:C:T	.	17	70175654	C	T	KCNJ2	synonymous_variant	2	168	0.0119048	0	0	0.0556	0	Benign/Likely_benign	Andersen_Tawil_syndrome|Short_QT_syndrome_type_3|Cardiovascular_phenotype|not_provided	KCNJ2	synonymous_variant	YES	0.154
5:130002584:G:A	rs142281464	17	75278312	G	A	SLC25A19	synonymous_variant	2	168	0.0119048	0.0313	0	0	0.02	Benign/Likely_benign	Amish_lethal_microcephaly|not_specified|not_provided	SLC25A19	synonymous_variant	YES	3.111
5:130435510:G:A	rs148312483	17	75733568	G	A	ITGB4	synonymous_variant	21	168	0.125	0.1875	0.2	0.0556	0.06	Benign/Likely_benign	Junctional_epidermolysis_bullosa_with_pyloric_atresia|not_provided	ITGB4	synonymous_variant	YES	0.236
5:130443840:T:C	rs61735292	17	75742437	C	T	ITGB4	synonymous_variant	145	168	0.863095	0.1563	0.18	0.1667	0.06	Benign/Likely_benign	Junctional_epidermolysis_bullosa_with_pyloric_atresia|not_specified|not_provided	ITGB4	synonymous_variant	YES	5.094
5:131182914:T:C	rs140265206	17	76478968	C	T	RHBDF2	synonymous_variant	151	168	0.89881	0.125	0.14	0.0833	0.06	Benign/Likely_benign	Palmoplantar_keratoderma-esophageal_carcinoma_syndrome|not_provided	RHBDF2	non-coding_transcript_variant,synonymous_variant	YES	0.07
5:23381323:G:A	rs41309927	20	18532706	G	A	SEC23B	missense_variant	2	168	0.0119048	0.0625	0	0	0	Benign/Likely_benign	Congenital_dyserythropoietic_anemia,_type_II|Cowden_syndrome_7|not_specified|not_provided	SEC23B	missense_variant	YES	18.23
5:37688360:G:A	rs190373692	20	44430058	G	A	HNF4A	3_prime_UTR_variant	9	168	0.0535714	0.125	0.02	0.0278	0.06	Benign/Likely_benign	Maturity-onset_diabetes_of_the_young_type_1|Familial_hyperinsulinism	HNF4A	3_prime_UTR_variant	YES	2.891
5:65831199:G:A	rs116535534	17	3530164	G	A	TRPV3	missense_variant	25	168	0.14881	0.2188	0.14	0.1667	0.1	Benign/Likely_benign	Isolated_focal_non-epidermolytic_palmoplantar_keratoderma|not_provided	TRPV3	missense_variant	YES	24.5
5:75817664:T:C	rs201553125	17	10638310	C	T	MYH3	synonymous_variant	93	168	0.553571	0.6563	0.38	0.5	0.34	Benign/Likely_benign	Freeman-Sheldon_syndrome|Distal_arthrogryposis_type_2B1|not_provided	MYH3	synonymous_variant	YES	5.374
5:75834523:T:C	rs141754213	17	10656144	C	T	MYH3	5_prime_UTR_variant	105	168	0.625	0.5313	0.3	0.4444	0.3	Benign/Likely_benign	Freeman-Sheldon_syndrome|Distal_arthrogryposis_type_2B1	MYH3	5_prime_UTR_variant	YES	0.361
5:85536631:G:A	rs139663254	17	46039088	G	A	KANSL1	intron_variant	7	168	0.0416667	0.125	0.06	0	0	Benign/Likely_benign	Koolen-de_Vries_syndrome|not_specified	KANSL1	synonymous_variant	NO	4.121
5:85536631:G:A	rs139663254	17	46039088	G	A	KANSL1	synonymous_variant	7	168	0.0416667	0.125	0.06	0	0	Benign/Likely_benign	Koolen-de_Vries_syndrome|not_specified	KANSL1	synonymous_variant	YES	4.121
5:87980069:C:T	rs117664682	17	63951555	C	T	SCN4A	missense_variant	8	168	0.047619	0.1875	0.04	0	0	Benign/Likely_benign	Hyperkalemic_periodic_paralysis|Paramyotonia_congenita_of_Von_Eulenburg|Hypokalemic_periodic_paralysis,_type_2|Congenital_myasthenic_syndrome_16|Potassium-aggravated_myotonia|not_specified|not_provided	SCN4A	missense_variant	YES	23.1
5:87980069:C:T	rs117664682	17	63951555	C	T	SCN4A	non_coding_transcript_exon_variant	8	168	0.047619	0.1875	0.04	0	0	Benign/Likely_benign	Hyperkalemic_periodic_paralysis|Paramyotonia_congenita_of_Von_Eulenburg|Hypokalemic_periodic_paralysis,_type_2|Congenital_myasthenic_syndrome_16|Potassium-aggravated_myotonia|not_specified|not_provided	SCN4A	missense_variant	NO	23.1
5:92125244:C:T	rs773196250	17	58724083	T	C	RAD51C	synonymous_variant	30	168	0.178571	0.9063	0.72	0.8889	0.82	Benign/Likely_benign	Fanconi_anemia_complementation_group_O|Hereditary_cancer-predisposing_syndrome|not_specified	RAD51C	non-coding_transcript_variant,synonymous_variant	YES	1.979
5:95497419:G:A	rs146141867	17	60159354	C	T	CA4	missense_variant	12	168	0.0714286	0.125	0.1	0	0.06	Benign/Likely_benign	Retinitis_pigmentosa|not_specified|not_provided	CA4	missense_variant,non-coding_transcript_variant	YES	4.693
6:109596768:C:T	rs369840788	2	127070109	C	T	.	intergenic_variant	4	168	0.0238095	0	0.02	0	0.06	Benign/Likely_benign	Myopathy,_centronuclear,_2|not_specified	BIN1	intron_variant	NO	0.186
6:156368673:T:C	rs3791000	2	237371715	C	T	COL6A3	intron_variant	109	168	0.64881	0.5625	0.3	0.1111	0.44	Benign/Likely_benign	Bethlem_myopathy_1|not_specified|not_provided	COL6A3	synonymous_variant,intron_variant	YES	0.201
6:159789142:T:C	rs370913170	2	240741337	C	T	KIF1A	synonymous_variant	167	168	0.994048	0	0	0	0.02	Benign/Likely_benign	Hereditary_spastic_paraplegia_30|Neuropathy,_hereditary_sensory,_type_2C|Intellectual_disability,_autosomal_dominant_9|Hereditary_spastic_paraplegia|Inborn_genetic_diseases|not_specified	KIF1A	synonymous_variant	YES	0.082
6:159793416:C:T	rs752843807	2	240745785	C	T	KIF1A	synonymous_variant	1	168	0.00595238	0	0	0	0.02	Benign/Likely_benign	Hereditary_spastic_paraplegia_30|Neuropathy,_hereditary_sensory,_type_2C|Intellectual_disability,_autosomal_dominant_9|Inborn_genetic_diseases|not_provided	KIF1A	synonymous_variant	YES	7.687
6:160823096:C:T	rs1105273	2	241751330	C	T	D2HGDH	missense_variant	1	168	0.00595238	0	0	0	0.02	Benign/Likely_benign	D-2-hydroxyglutaric_aciduria_1|not_specified|not_provided	D2HGDH	missense_variant	YES	0.032
6:1643378:G:A	rs79274924	15	26883351	C	T	GABRA5	synonymous_variant	49	168	0.291667	0.4375	0.34	0.0556	0.32	Benign/Likely_benign	not_provided	GABRA5	synonymous_variant	YES	5.928
6:17104180:G:A	rs200126841	15	89633122	G	A	KIF7	intron_variant	1	168	0.00595238	0	0	0.0278	0	Benign/Likely_benign	Acrocallosal_syndrome|not_specified	KIF7	intron_variant	YES	0.002
6:17104180:G:A	rs200126841	15	89633122	G	A	KIF7	intron_variant&non_coding_transcript_variant	1	168	0.00595238	0	0	0.0278	0	Benign/Likely_benign	Acrocallosal_syndrome|not_specified	KIF7	intron_variant	NO	0.002
6:21888516:C:T	rs28408840	15	84816855	G	A	ALPK3	5_prime_UTR_variant	1	168	0.00595238	0	0	0	0.02	Benign/Likely_benign	Cardiovascular_phenotype|not_provided	ALPK3	synonymous_variant	NO	5.475
6:21888516:C:T	rs28408840	15	84816855	G	A	ALPK3	upstream_gene_variant	1	168	0.00595238	0	0	0	0.02	Benign/Likely_benign	Cardiovascular_phenotype|not_provided	ALPK3	synonymous_variant	NO	5.475
6:333014:A:G	rs547634456	15	22823786	C	T	NIPA1	synonymous_variant	158	168	0.940476	0.1875	0.04	0	0.04	Benign/Likely_benign	Hereditary_spastic_paraplegia_6|Spastic_paraplegia,_autosomal_dominant|not_provided	NIPA1	synonymous_variant	YES	0.859
6:37508203:G:A	rs372869641	2	189052752	C	T	COL5A2	synonymous_variant	1	168	0.00595238	0	0	0	0.02	Benign/Likely_benign	Ehlers-Danlos_syndrome,_classic_type,_1|Familial_thoracic_aortic_aneurysm_and_aortic_dissection|not_provided	COL5A2	synonymous_variant	YES	3.239
6:37564336:A:G	rs755731385	2	188994594	C	T	COL3A1	splice_region_variant&synonymous_variant	37	168	0.220238	0.9688	0.56	0.9444	0.76	Benign/Likely_benign	Ehlers-Danlos_syndrome,_type_4|Familial_thoracic_aortic_aneurysm_and_aortic_dissection	COL3A1	synonymous_variant	NO	1
6:47451888:C:T	rs56324602	2	178529113	C	T	LOC118154545	downstream_gene_variant	3	168	0.0178571	0.0938	0	0	0	Benign/Likely_benign	Cardiomyopathy|Tibial_muscular_dystrophy|Myopathy,_myofibrillar,_9,_with_early_respiratory_failure|Dilated_cardiomyopathy_1G|Autosomal_recessive_limb-girdle_muscular_dystrophy_type_2J|Early-onset_myopathy_with_fatal_cardiomyopathy|not_specified|Cardiovascular_phenotype|not_provided	TTN	synonymous_variant	NO	0.068
6:47451888:C:T	rs56324602	2	178529113	C	T	TTN	missense_variant	3	168	0.0178571	0.0938	0	0	0	Benign/Likely_benign	Cardiomyopathy|Tibial_muscular_dystrophy|Myopathy,_myofibrillar,_9,_with_early_respiratory_failure|Dilated_cardiomyopathy_1G|Autosomal_recessive_limb-girdle_muscular_dystrophy_type_2J|Early-onset_myopathy_with_fatal_cardiomyopathy|not_specified|Cardiovascular_phenotype|not_provided	TTN	synonymous_variant	NO	0.068
6:47524027:G:A	rs377164046	2	178601485	G	A	TTN	synonymous_variant	6	168	0.0357143	0	0.04	0.1111	0	Benign/Likely_benign	Tibial_muscular_dystrophy|Myopathy,_myofibrillar,_9,_with_early_respiratory_failure|Dilated_cardiomyopathy_1G|Autosomal_recessive_limb-girdle_muscular_dystrophy_type_2J|Early-onset_myopathy_with_fatal_cardiomyopathy|not_specified|Cardiovascular_phenotype|not_provided	TTN	synonymous_variant	YES	1.057
6:47641067:G:A	rs535793314	2	178727223	G	A	TTN	synonymous_variant	4	168	0.0238095	0	0	0	0.08	Benign/Likely_benign	Tibial_muscular_dystrophy|Myopathy,_myofibrillar,_9,_with_early_respiratory_failure|Dilated_cardiomyopathy_1G|Autosomal_recessive_limb-girdle_muscular_dystrophy_type_2J|Early-onset_myopathy_with_fatal_cardiomyopathy|not_specified	TTN	synonymous_variant,intron_variant	YES	6.165
6:61093417:C:T	rs201560403	2	166277124	G	A	LOC103793760	intron_variant&non_coding_transcript_variant	11	168	0.0654762	0.0938	0.06	0.0833	0.04	Benign/Likely_benign	Generalized_epilepsy_with_febrile_seizures_plus,_type_7|Neuropathy,_hereditary_sensory_and_autonomic,_type_2A|Inborn_genetic_diseases	SCN9A	non-coding_transcript_variant,synonymous_variant	NO	7.221
6:61093417:C:T	rs201560403	2	166277124	G	A	SCN9A	synonymous_variant	11	168	0.0654762	0.0938	0.06	0.0833	0.04	Benign/Likely_benign	Generalized_epilepsy_with_febrile_seizures_plus,_type_7|Neuropathy,_hereditary_sensory_and_autonomic,_type_2A|Inborn_genetic_diseases	SCN9A	non-coding_transcript_variant,synonymous_variant	YES	7.221
6:61455292:G:C	rs145436538	2	165919379	G	C	TTC21B	missense_variant	120	168	0.714286	0.5	0.16	0.2778	0.28	Benign/Likely_benign	Nephronophthisis|Asphyxiating_thoracic_dystrophy_4|Nephronophthisis_12|Jeune_thoracic_dystrophy|not_specified|not_provided	TTC21B	missense_variant	YES	23.5
6:61461520:A:G	rs79037278	2	165912511	T	C	TTC21B	splice_region_variant&intron_variant	34	168	0.202381	0.1875	0.12	0.2778	0.24	Benign/Likely_benign	Nephronophthisis|Connective_tissue_disorder|Joubert_syndrome_1|Asphyxiating_thoracic_dystrophy_4|Nephronophthisis_12|Jeune_thoracic_dystrophy|not_specified|not_provided	TTC21B	intron_variant	NO	13.12
6:76560627:C:T	rs113403461	2	151526145	G	A	NEB	intron_variant	11	168	0.0654762	0.125	0.12	0	0.02	Benign/Likely_benign	Nemaline_myopathy_2|not_specified	NEB	intron_variant	YES	0.004
6:83650805:C:T	rs370751674	2	144403955	G	A	ZEB2	synonymous_variant	4	168	0.0238095	0	0	0.1111	0	Benign/Likely_benign	Mowat-Wilson_syndrome|Inborn_genetic_diseases|not_specified	ZEB2	synonymous_variant	YES	11.85
7:113720786:C:T	rs371431782	1	77917694	C	T	NEXN	intron_variant	9	168	0.0535714	0.0313	0.04	0.0833	0.06	Benign/Likely_benign	Cardiomyopathy|Dilated_cardiomyopathy_1CC|Hypertrophic_cardiomyopathy_20|not_specified|Cardiovascular_phenotype|not_provided	NEXN	synonymous_variant,intron_variant	YES	0.556
7:113720786:C:T	rs371431782	1	77917694	C	T	NEXN	synonymous_variant	9	168	0.0535714	0.0313	0.04	0.0833	0.06	Benign/Likely_benign	Cardiomyopathy|Dilated_cardiomyopathy_1CC|Hypertrophic_cardiomyopathy_20|not_specified|Cardiovascular_phenotype|not_provided	NEXN	synonymous_variant,intron_variant	YES	0.556
7:16531608:A:G	rs116350428	10	17071828	G	A	CUBN	splice_region_variant&synonymous_variant	93	168	0.553571	0.375	0.52	0.3889	0.46	Benign/Likely_benign	Imerslund-Grasbeck_syndrome|Imerslund-Grasbeck_syndrome_type_1|not_provided	CUBN	synonymous_variant	NO	0.032
7:25067784:G:A	rs41279908	10	26096649	G	A	MYO3A	synonymous_variant	24	168	0.142857	0.0313	0.08	0.1111	0.3	Benign/Likely_benign	Autosomal_recessive_nonsyndromic_hearing_loss_30|not_specified|not_provided	MYO3A	synonymous_variant	YES	7.624
7:25763196:C:G	rs41282216	10	27155228	G	C	MASTL	upstream_gene_variant	119	168	0.708333	0.5938	0.18	0.2778	0.22	Benign/Likely_benign	Thrombocytopenia|not_provided	MASTL	genic_upstream_transcript_variant	NO	1.684
7:25763196:C:G	rs41282216	10	27155228	G	C	YME1L1	5_prime_UTR_variant	119	168	0.708333	0.5938	0.18	0.2778	0.22	Benign/Likely_benign	Thrombocytopenia|not_provided	MASTL	genic_upstream_transcript_variant	NO	1.684
7:38961572:T:C	rs111935632	1	2304345	C	T	SKI	synonymous_variant	147	168	0.875	0.0938	0.18	0.1111	0.1	Benign/Likely_benign	Shprintzen-Goldberg_syndrome|Familial_thoracic_aortic_aneurysm_and_aortic_dissection|not_specified	SKI	synonymous_variant	YES	0.3
7:39902591:G:A	rs368426649	1	3412255	G	A	PRDM16	synonymous_variant	1	168	0.00595238	0	0	0.0278	0	Benign/Likely_benign	Left_ventricular_noncompaction_8|not_provided	PRDM16	synonymous_variant	YES	0.449
7:39914513:C:T	rs377695146	1	3425563	C	T	PRDM16	intron_variant	3	168	0.0178571	0	0.06	0	0	Benign/Likely_benign	Left_ventricular_noncompaction_8|not_specified	PRDM16	intron_variant	YES	2.667
7:39919561:G:A	.	1	3430875	G	A	PRDM16	synonymous_variant	3	168	0.0178571	0.0938	0	0	0	Benign/Likely_benign	not_specified|not_provided	PRDM16	synonymous_variant	YES	0.093
7:47681139:G:A	.	1	11213386	G	A	MTOR	intron_variant	95	168	0.565476	0.5	0.5	0.6111	0.64	Benign/Likely_benign	not_provided	MTOR	intron_variant	YES	0.204
7:47681139:G:A	.	1	11213386	G	A	MTOR	intron_variant&non_coding_transcript_variant	95	168	0.565476	0.5	0.5	0.6111	0.64	Benign/Likely_benign	not_provided	MTOR	intron_variant	NO	0.204
7:57255840:C:T	rs202214491	1	21873960	C	T	HSPG2	synonymous_variant	1	168	0.00595238	0	0.02	0	0	Benign/Likely_benign	Connective_tissue_disorder|Lethal_Kniest-like_syndrome|Schwartz-Jampel_syndrome|not_provided	HSPG2	synonymous_variant	YES	2.013
7:90473640:G:A	.	1	54758008	G	A	PARS2	missense_variant	3	168	0.0178571	0.0313	0	0.0278	0.02	Benign/Likely_benign	not_provided	PARS2	missense_variant	YES	0.403
7:90727005:C:T	.	1	55039995	C	T	PCSK9	5_prime_UTR_variant	47	168	0.279762	0.2188	0.2	0.5278	0.22	Benign/Likely_benign	Hypercholesterolemia,_familial,_1|Hypercholesterolemia,_autosomal_dominant,_3|Hypobetalipoproteinemia|not_specified|Cardiovascular_phenotype|not_provided	PCSK9	missense_variant	NO	14.65
7:90727005:C:T	.	1	55039995	C	T	PCSK9	missense_variant	47	168	0.279762	0.2188	0.2	0.5278	0.22	Benign/Likely_benign	Hypercholesterolemia,_familial,_1|Hypercholesterolemia,_autosomal_dominant,_3|Hypobetalipoproteinemia|not_specified|Cardiovascular_phenotype|not_provided	PCSK9	missense_variant	YES	14.65
7:97888835:G:A	rs112048152	1	62273875	G	A	KANK4	missense_variant	62	168	0.369048	0.2188	0.42	0.5	0.32	Benign/Likely_benign	not_provided	KANK4	missense_variant,intron_variant	YES	2.891
8:102284525:A:G	rs201404573	7	143321706	C	T	CLCN1	intron_variant	111	168	0.660714	0.5625	0.4	0.3611	0.12	Benign/Likely_benign	Congenital_myotonia,_autosomal_dominant_form|Congenital_myotonia,_autosomal_recessive_form|Batten-Turner_congenital_myopathy	CLCN1	intron_variant	YES	0.598
8:103796601:G:A	rs116500538	7	141653108	C	T	AGK	3_prime_UTR_variant	7	168	0.0416667	0.0313	0	0.0556	0.08	Benign/Likely_benign	Sengers_syndrome|Cataract_38|not_provided	AGK	3_prime_UTR_variant	YES	5.726
8:103796601:G:A	rs116500538	7	141653108	C	T	AGK	intron_variant&non_coding_transcript_variant	7	168	0.0416667	0.0313	0	0.0556	0.08	Benign/Likely_benign	Sengers_syndrome|Cataract_38|not_provided	AGK	3_prime_UTR_variant	NO	5.726
8:103796601:G:A	rs116500538	7	141653108	C	T	DENND11	downstream_gene_variant	7	168	0.0416667	0.0313	0	0.0556	0.08	Benign/Likely_benign	Sengers_syndrome|Cataract_38|not_provided	AGK	3_prime_UTR_variant	NO	5.726
8:103833657:G:A	rs113599212	7	141615466	C	T	AGK	splice_region_variant&intron_variant	8	168	0.047619	0.125	0.04	0.0278	0.02	Benign/Likely_benign	Sengers_syndrome|Cataract_38|not_provided	AGK	intron_variant	NO	1.555
8:103833657:G:A	rs113599212	7	141615466	C	T	AGK	splice_region_variant&intron_variant&non_coding_transcript_variant	8	168	0.047619	0.125	0.04	0.0278	0.02	Benign/Likely_benign	Sengers_syndrome|Cataract_38|not_provided	AGK	intron_variant	NO	1.555
8:109730455:T:C	rs61732900	7	135638676	G	A	NUP205	synonymous_variant	60	168	0.357143	0.7188	0.66	0.75	0.5	Benign/Likely_benign	not_provided	NUP205	synonymous_variant	YES	0.865
8:11381314:G:A	rs41282712	7	44157901	G	A	GCK	intron_variant	4	168	0.0238095	0.0313	0.06	0	0	Benign/Likely_benign	Maturity_onset_diabetes_mellitus_in_young|not_provided	GCK	intron_variant	YES	0.423
8:85428777:A:G	rs45612435	7	116774917	G	A	MET	missense_variant	12	168	0.0714286	1	0.98	0.9444	0.82	Benign/Likely_benign	Renal_cell_carcinoma|Renal_cell_carcinoma,_papillary,_1|Hereditary_cancer-predisposing_syndrome	MET	missense_variant	YES	25.9
8:9336993:C:T	rs757059523	7	41965442	C	T	GLI3	missense_variant	4	168	0.0238095	0	0.08	0	0	Benign/Likely_benign	Polydactyly|Pallister-Hall_syndrome|Greig_cephalopolysyndactyly_syndrome	GLI3	missense_variant	YES	17.82
8:9339671:T:C	rs146130351	7	41967862	T	C	GLI3	missense_variant	2	168	0.0119048	0	0.02	0.0278	0	Benign/Likely_benign	Polydactyly|Pallister-Hall_syndrome|Greig_cephalopolysyndactyly_syndrome|not_specified|not_provided	GLI3	missense_variant	YES	17.08
8:94766564:A:G	rs113234987	7	151557198	C	T	PRKAG2	3_prime_UTR_variant	154	168	0.916667	0	0.1	0.0278	0.16	Benign/Likely_benign	Cardiomyopathy|Wolff-Parkinson-White_pattern|Hypertrophic_cardiomyopathy_6|not_specified|Cardiovascular_phenotype|not_provided	PRKAG2	3_prime_UTR_variant	YES	0.155
8:95361921:G:A	rs376180501	7	150945497	C	T	KCNH2	synonymous_variant	78	168	0.464286	0.5938	0.46	0.2222	0.56	Benign/Likely_benign	Cardiac_arrhythmia|Long_QT_syndrome|not_specified|Cardiovascular_phenotype|not_provided	KCNH2	synonymous_variant	YES	9.858
9:110255510:A:G	rs146929022	12	109794422	G	A	TRPV4	synonymous_variant	89	168	0.529762	0.7813	0.46	0.5556	0.22	Benign/Likely_benign	Brachyrachia_(short_spine_dysplasia)|Metatropic_dysplasia|Scapuloperoneal_spinal_muscular_atrophy|Spondylometaphyseal_dysplasia,_Kozlowski_type|Autosomal_dominant_congenital_benign_spinal_muscular_atrophy|Charcot-Marie-Tooth_disease_axonal_type_2C|Inborn_genetic_diseases|not_specified|not_provided	TRPV4	synonymous_variant	YES	5.643
9:110276550:G:A	rs112408790	12	109814740	G	A	TRPV4	synonymous_variant	5	168	0.0297619	0.0938	0.02	0	0.02	Benign/Likely_benign	Charcot-Marie-Tooth_disease_axonal_type_2C|Charcot-Marie-Tooth_disease|Inborn_genetic_diseases|not_specified|not_provided	TRPV4	synonymous_variant	YES	0.351
9:113032324:A:G	rs142648640	12	112506630	G	A	PTPN11	3_prime_UTR_variant	160	168	0.952381	0.0938	0.02	0.0833	0.02	Benign/Likely_benign	Metachondromatosis|Noonan_syndrome_1|LEOPARD_syndrome_1	PTPN11	3_prime_UTR_variant	YES	3.251
9:17589746:T:C	rs546732699	12	6022792	T	C	VWF	synonymous_variant	13	168	0.077381	0	0.08	0.1667	0.06	Benign/Likely_benign	von_Willebrand_disease_type_1|von_Willebrand_disease_type_3|von_Willebrand_disease_type_2|von_Willebrand_disorder|not_specified|not_provided	VWF	synonymous_variant	YES	1.124
9:17612057:G:A	rs1063857	12	6044348	A	G	VWF	synonymous_variant	149	168	0.886905	0.0938	0.12	0.1389	0.1	Benign/Likely_benign	von_Willebrand_disease_type_1|von_Willebrand_disease_type_3|von_Willebrand_disease_type_2|von_Willebrand_disorder|not_specified|not_provided	VWF	synonymous_variant	YES	0.722
9:17890947:A:G	.	12	6333380	G	A	TNFRSF1A	intron_variant	64	168	0.380952	0.6875	0.68	0.5833	0.54	Benign/Likely_benign	TNF_receptor-associated_periodic_fever_syndrome_(TRAPS)|not_provided	TNFRSF1A	non-coding_transcript_variant,synonymous_variant,5_prime_UTR_variant	NO	0.098
9:17890947:A:G	.	12	6333380	G	A	TNFRSF1A	synonymous_variant	64	168	0.380952	0.6875	0.68	0.5833	0.54	Benign/Likely_benign	TNF_receptor-associated_periodic_fever_syndrome_(TRAPS)|not_provided	TNFRSF1A	non-coding_transcript_variant,synonymous_variant,5_prime_UTR_variant	YES	0.098
9:21446242:G:A	.	12	8861176	G	A	A2ML1	synonymous_variant	1	168	0.00595238	0	0.02	0	0	Benign/Likely_benign	Inborn_genetic_diseases|not_specified	A2ML1	synonymous_variant	YES	0.076
9:318329:A:G	rs34613777	12	47976026	A	G	COL2A1	synonymous_variant	40	168	0.238095	0.5625	0.3	0.0556	0.1	Benign/Likely_benign	Stickler_syndrome_type_1|Type_II_Collagenopathies|not_specified|not_provided	COL2A1	synonymous_variant	YES	8.436
9:318329:A:G	rs34613777	12	47976026	A	G	LOC118144064	downstream_gene_variant	40	168	0.238095	0.5625	0.3	0.0556	0.1	Benign/Likely_benign	Stickler_syndrome_type_1|Type_II_Collagenopathies|not_specified|not_provided	COL2A1	synonymous_variant	NO	8.436
9:5811037:G:A	rs80309166	12	15526198	C	T	PTPRO	synonymous_variant	46	168	0.27381	0.5625	0.18	0.2778	0.18	Benign/Likely_benign	not_provided	PTPRO	synonymous_variant	YES	5.875
9:64397671:G:A	rs34787940	12	52680236	C	T	KRT1	missense_variant	1	168	0.00595238	0.0313	0	0	0	Benign/Likely_benign	Diffuse_nonepidermolytic_palmoplantar_keratoderma|Bullous_ichthyosiform_erythroderma|not_specified|not_provided	KRT1	missense_variant	YES	16.91
9:64400546:C:T	rs183980482	12	52677337	G	A	KRT1	synonymous_variant	1	168	0.00595238	0.0313	0	0	0	Benign/Likely_benign	Diffuse_nonepidermolytic_palmoplantar_keratoderma|Bullous_ichthyosiform_erythroderma|not_provided	KRT1	synonymous_variant	YES	0.137
10:105962526:G:A	rs146119949	14	74500765	G	A	ISCA2	downstream_gene_variant	34	168	0.202381	0.1875	0.14	0.3889	0.14	Conflicting_interpretations_of_pathogenicity	Glaucoma_3,_primary_congenital,_D|Weill-Marchesani_syndrome|not_provided	LTBP2	3_prime_UTR_variant	NO	11.45
10:105962526:G:A	rs146119949	14	74500765	G	A	LTBP2	3_prime_UTR_variant	34	168	0.202381	0.1875	0.14	0.3889	0.14	Conflicting_interpretations_of_pathogenicity	Glaucoma_3,_primary_congenital,_D|Weill-Marchesani_syndrome|not_provided	LTBP2	3_prime_UTR_variant	YES	11.45
10:108757741:G:A	rs142916824	14	77286731	G	A	POMT2	intron_variant	5	168	0.0297619	0	0	0.1111	0.02	Conflicting_interpretations_of_pathogenicity	Muscular_dystrophy-dystroglycanopathy_(congenital_with_brain_and_eye_anomalies),_type_A2|Muscular_dystrophy-dystroglycanopathy_(congenital_with_intellectual_disability),_type_B2|Autosomal_recessive_limb-girdle_muscular_dystrophy_type_2N|not_specified|not_provided	POMT2	intron_variant	YES	7.882
10:11828711:C:T	rs1595882053	15	67066166	C	T	LOC103795537	downstream_gene_variant	5	168	0.0297619	0	0.02	0	0.08	Conflicting_interpretations_of_pathogenicity	Aneurysm-osteoarthritis_syndrome|Familial_thoracic_aortic_aneurysm_and_aortic_dissection|not_provided	SMAD3	synonymous_variant	NO	13.7
10:11828711:C:T	rs1595882053	15	67066166	C	T	SMAD3	synonymous_variant	5	168	0.0297619	0	0.02	0	0.08	Conflicting_interpretations_of_pathogenicity	Aneurysm-osteoarthritis_syndrome|Familial_thoracic_aortic_aneurysm_and_aortic_dissection|not_provided	SMAD3	synonymous_variant	YES	13.7
10:11828711:C:T	rs1595882053	15	67066166	C	T	SMAD3	upstream_gene_variant	5	168	0.0297619	0	0.02	0	0.08	Conflicting_interpretations_of_pathogenicity	Aneurysm-osteoarthritis_syndrome|Familial_thoracic_aortic_aneurysm_and_aortic_dissection|not_provided	SMAD3	synonymous_variant	NO	13.7
10:11935990:C:T	rs774268232	15	67165246	C	T	SMAD3	intron_variant	43	168	0.255952	0.375	0.18	0.2222	0.28	Conflicting_interpretations_of_pathogenicity	Familial_thoracic_aortic_aneurysm_and_aortic_dissection|not_provided	SMAD3	intron_variant	YES	3.746
10:11935990:C:T	rs774268232	15	67165246	C	T	SMAD3	splice_region_variant&intron_variant	43	168	0.255952	0.375	0.18	0.2222	0.28	Conflicting_interpretations_of_pathogenicity	Familial_thoracic_aortic_aneurysm_and_aortic_dissection|not_provided	SMAD3	intron_variant	NO	3.746
10:119836222:G:A	rs199727517	14	88426246	G	A	SPATA7	synonymous_variant	3	168	0.0178571	0	0	0.0833	0	Conflicting_interpretations_of_pathogenicity	Retinitis_pigmentosa|Leber_congenital_amaurosis_3	SPATA7	synonymous_variant	YES	1.486
10:1272245:C:T	rs483352760	15	57461811	T	C	CGNL1	synonymous_variant	146	168	0.869048	0.1563	0	0.4167	0.04	Conflicting_interpretations_of_pathogenicity	not_provided	CGNL1	synonymous_variant	YES	7.225
10:133474318:C:T	rs35092963	14	101986601	C	T	DYNC1H1	synonymous_variant	2	168	0.0119048	0	0	0.0556	0	Conflicting_interpretations_of_pathogenicity	Autosomal_dominant_childhood-onset_proximal_spinal_muscular_atrophy_without_contractures|Charcot-Marie-Tooth_disease_axonal_type_2O|Intellectual_disability,_autosomal_dominant_13|Autosomal_dominant_cerebellar_ataxia|Inborn_genetic_diseases|not_specified	DYNC1H1	synonymous_variant	YES	3.047
10:133535760:C:T	rs200901713	14	102049590	C	T	DYNC1H1	splice_region_variant&intron_variant	1	168	0.00595238	0	0	0.0278	0	Conflicting_interpretations_of_pathogenicity	Charcot-Marie-Tooth_disease_axonal_type_2O|Autosomal_dominant_cerebellar_ataxia|not_provided	DYNC1H1	intron_variant	NO	0.619
10:136153330:A:G	rs754546219	14	104713278	G	A	INF2	synonymous_variant	130	168	0.77381	0.375	0.2	0.1944	0.18	Conflicting_interpretations_of_pathogenicity	Focal_segmental_glomerulosclerosis_5|Charcot-Marie-Tooth_disease_dominant_intermediate_E|Inborn_genetic_diseases|not_provided	INF2	synonymous_variant	YES	0.135
10:136154770:G:A	rs756383109	14	104714768	G	A	INF2	synonymous_variant	5	168	0.0297619	0	0	0.1389	0	Conflicting_interpretations_of_pathogenicity	Focal_segmental_glomerulosclerosis_5|Charcot-Marie-Tooth_disease_dominant_intermediate_E|Inborn_genetic_diseases	INF2	synonymous_variant	YES	0.046
10:27018934:C:T	rs146279300	15	42746201	C	T	LOC118145089	downstream_gene_variant	14	168	0.0833333	0.1563	0.04	0.0278	0.12	Conflicting_interpretations_of_pathogenicity	Spinocerebellar_ataxia_type_11|not_specified|not_provided	TTBK2	missense_variant	NO	24
10:27018934:C:T	rs146279300	15	42746201	C	T	TTBK2	missense_variant	14	168	0.0833333	0.1563	0.04	0.0278	0.12	Conflicting_interpretations_of_pathogenicity	Spinocerebellar_ataxia_type_11|not_specified|not_provided	TTBK2	missense_variant	YES	24
10:27465256:G:A	rs114136713	15	43211512	A	G	EPB42	synonymous_variant	161	168	0.958333	0.1563	0.02	0	0.02	Conflicting_interpretations_of_pathogenicity	Hereditary_spherocytosis_type_5|not_specified|not_provided	EPB42	synonymous_variant	YES	3.918
10:32650911:G:A	rs145040593	15	48470650	G	A	FBN1	non_coding_transcript_exon_variant	7	168	0.0416667	0.1563	0.02	0	0.02	Conflicting_interpretations_of_pathogenicity	Marfan_syndrome|Familial_thoracic_aortic_aneurysm_and_aortic_dissection|not_specified|not_provided	FBN1	synonymous_variant	NO	2.279
10:32650911:G:A	rs145040593	15	48470650	G	A	FBN1	synonymous_variant	7	168	0.0416667	0.1563	0.02	0	0.02	Conflicting_interpretations_of_pathogenicity	Marfan_syndrome|Familial_thoracic_aortic_aneurysm_and_aortic_dissection|not_specified|not_provided	FBN1	synonymous_variant	YES	2.279
10:35427331:C:T	rs143386224	15	51242889	C	T	CYP19A1	synonymous_variant	5	168	0.0297619	0.125	0.02	0	0	Conflicting_interpretations_of_pathogenicity	Aromatase_deficiency|not_provided	CYP19A1	synonymous_variant	YES	0.234
10:35427331:C:T	rs143386224	15	51242889	C	T	LOC103795616	intron_variant&non_coding_transcript_variant	5	168	0.0297619	0.125	0.02	0	0	Conflicting_interpretations_of_pathogenicity	Aromatase_deficiency|not_provided	CYP19A1	synonymous_variant	NO	0.234
10:44791890:G:A	rs768937237	15	38351334	C	T	SPRED1	synonymous_variant	14	168	0.0833333	0.1563	0.04	0	0.14	Conflicting_interpretations_of_pathogenicity	Legius_syndrome|Noonan_syndrome_and_Noonan-related_syndrome|not_provided	SPRED1	synonymous_variant	YES	6.635
10:49739089:A:G	rs201830013	15	33550267	G	A	RYR3	missense_variant	150	168	0.892857	0.25	0.04	0	0.16	Conflicting_interpretations_of_pathogenicity	Epileptic_encephalopathy	RYR3	missense_variant	YES	24
10:52288219:C:T	rs368434311	14	21324775	C	T	RPGRIP1	intron_variant	8	168	0.047619	0	0.04	0	0.12	Conflicting_interpretations_of_pathogenicity	Cone-rod_dystrophy_13|Leber_congenital_amaurosis_6|not_specified	RPGRIP1	synonymous_variant,intron_variant	YES	3.395
10:52288219:C:T	rs368434311	14	21324775	C	T	RPGRIP1	synonymous_variant	8	168	0.047619	0	0.04	0	0.12	Conflicting_interpretations_of_pathogenicity	Cone-rod_dystrophy_13|Leber_congenital_amaurosis_6|not_specified	RPGRIP1	synonymous_variant,intron_variant	YES	3.395
10:54213747:G:A	rs763963623	14	23396797	A	G	MYH6	missense_variant	167	168	0.994048	0	0	0	0.02	Conflicting_interpretations_of_pathogenicity	Hypertrophic_cardiomyopathy_14|Cardiovascular_phenotype	MYH6	missense_variant	YES	16.14
10:59463988:C:G	rs141088742	14	28767873	C	G	FOXG1	synonymous_variant	5	168	0.0297619	0.125	0	0	0.02	Conflicting_interpretations_of_pathogenicity	Rett_syndrome,_congenital_variant|Inborn_genetic_diseases|not_specified|not_provided	FOXG1	synonymous_variant	YES	9.281
10:59463988:C:G	rs141088742	14	28767873	C	G	LOC118144905	upstream_gene_variant	5	168	0.0297619	0.125	0	0	0.02	Conflicting_interpretations_of_pathogenicity	Rett_syndrome,_congenital_variant|Inborn_genetic_diseases|not_specified|not_provided	FOXG1	synonymous_variant	NO	9.281
10:7511772:C:T	rs759081217	15	63061286	C	T	TPM1	intron_variant	3	168	0.0178571	0	0.02	0	0.04	Conflicting_interpretations_of_pathogenicity	not_specified	TPM1	intron_variant	YES	19.05
10:95998905:C:T	rs149316006	14	64787084	C	T	SPTB	missense_variant	11	168	0.0654762	0.0313	0.06	0	0.14	Conflicting_interpretations_of_pathogenicity	not_specified|not_provided	SPTB	missense_variant	YES	14.2
1:104444499:T:C	rs752134753	9	77315442	T	C	LOC100894345	intron_variant	7	168	0.0416667	0	0.02	0	0.12	Conflicting_interpretations_of_pathogenicity	Chorea-acanthocytosis|not_provided	VPS13A	synonymous_variant	NO	6.927
1:104444499:T:C	rs752134753	9	77315442	T	C	VPS13A	non_coding_transcript_exon_variant	7	168	0.0416667	0	0.02	0	0.12	Conflicting_interpretations_of_pathogenicity	Chorea-acanthocytosis|not_provided	VPS13A	synonymous_variant	NO	6.927
1:104444499:T:C	rs752134753	9	77315442	T	C	VPS13A	synonymous_variant	7	168	0.0416667	0	0.02	0	0.12	Conflicting_interpretations_of_pathogenicity	Chorea-acanthocytosis|not_provided	VPS13A	synonymous_variant	YES	6.927
1:105191674:T:C	rs749575443	9	452003	C	T	DOCK8	splice_region_variant&intron_variant	167	168	0.994048	0	0	0.0278	0	Conflicting_interpretations_of_pathogenicity	Combined_immunodeficiency_due_to_DOCK8_deficiency|not_specified|not_provided	DOCK8	intron_variant	NO	0.441
1:105191674:T:C	rs749575443	9	452003	C	T	DOCK8	splice_region_variant&intron_variant&non_coding_transcript_variant	167	168	0.994048	0	0	0.0278	0	Conflicting_interpretations_of_pathogenicity	Combined_immunodeficiency_due_to_DOCK8_deficiency|not_specified|not_provided	DOCK8	intron_variant	NO	0.441
1:107398320:T:C	rs746308049	9	2645015	C	T	VLDLR	synonymous_variant	57	168	0.339286	0.5313	0.74	0.6389	0.68	Conflicting_interpretations_of_pathogenicity	not_specified|not_provided	VLDLR	synonymous_variant	YES	11.92
11:109856200:G:A	rs150681693	11	46875085	G	A	LRP4	missense_variant	1	168	0.00595238	0.0313	0	0	0	Conflicting_interpretations_of_pathogenicity	Cenani-Lenz_syndactyly_syndrome|Sclerosteosis_2|Congenital_myasthenic_syndrome_17|not_specified|not_provided	LRP4	missense_variant	YES	8.237
11:110322843:C:T	rs376041792	11	47342636	C	T	MYBPC3	synonymous_variant	33	168	0.196429	0.2188	0.16	0.2222	0.2	Conflicting_interpretations_of_pathogenicity	Cardiomyopathy|Hypertrophic_cardiomyopathy|Hypertrophic_cardiomyopathy_4|Left_ventricular_noncompaction_10|not_specified|Cardiovascular_phenotype|not_provided	MYBPC3	synonymous_variant	YES	0.068
1:111317835:C:G	rs915226152	9	6645422	C	G	GLDC	5_prime_UTR_variant	5	168	0.0297619	0	0.04	0.0833	0	Conflicting_interpretations_of_pathogenicity	Non-ketotic_hyperglycinemia|not_provided	GLDC	synonymous_variant	NO	5.754
1:111317835:C:G	rs915226152	9	6645422	C	G	GLDC	synonymous_variant	5	168	0.0297619	0	0.04	0.0833	0	Conflicting_interpretations_of_pathogenicity	Non-ketotic_hyperglycinemia|not_provided	GLDC	synonymous_variant	YES	5.754
11:119773332:G:A	rs773543072	11	64750471	G	A	PYGM	synonymous_variant	5	168	0.0297619	0	0.06	0.0278	0.02	Conflicting_interpretations_of_pathogenicity	Glycogen_storage_disease,_type_V|not_provided	PYGM	synonymous_variant	YES	0.333
11:122665675:C:T	rs200417926	11	67610582	C	T	LOC100410370	downstream_gene_variant	57	168	0.339286	0.25	0.42	0.5278	0.18	Conflicting_interpretations_of_pathogenicity	Leigh_syndrome|Mitochondrial_complex_I_deficiency,_nuclear_type_1|not_specified	NDUFV1	intron_variant	NO	4.015
11:122665675:C:T	rs200417926	11	67610582	C	T	NDUFV1	intron_variant	57	168	0.339286	0.25	0.42	0.5278	0.18	Conflicting_interpretations_of_pathogenicity	Leigh_syndrome|Mitochondrial_complex_I_deficiency,_nuclear_type_1|not_specified	NDUFV1	intron_variant	YES	4.015
11:122840246:G:A	rs1241903068	11	68049304	G	A	CHKA	downstream_gene_variant	1	168	0.00595238	0	0	0	0.02	Conflicting_interpretations_of_pathogenicity	Autosomal_recessive_osteopetrosis_1|not_provided	TCIRG1	intron_variant	NO	4.592
11:122840246:G:A	rs1241903068	11	68049304	G	A	TCIRG1	intron_variant	1	168	0.00595238	0	0	0	0.02	Conflicting_interpretations_of_pathogenicity	Autosomal_recessive_osteopetrosis_1|not_provided	TCIRG1	intron_variant	YES	4.592
11:123199218:T:C	.	11	68406768	T	C	LRP5	synonymous_variant	1	168	0.00595238	0	0	0	0.02	Conflicting_interpretations_of_pathogenicity	Osteogenesis_imperfecta|not_provided	LRP5	synonymous_variant	YES	0.368
11:123701499:G:A	rs745534850	11	68929316	G	A	IGHMBP2	synonymous_variant	9	168	0.0535714	0	0.08	0.0556	0.06	Conflicting_interpretations_of_pathogenicity	Autosomal_recessive_distal_spinal_muscular_atrophy_1|Charcot-Marie-Tooth_disease_axonal_type_2S|Inborn_genetic_diseases	IGHMBP2	synonymous_variant	YES	0.187
11:123704989:C:T	rs191443556	11	68933294	C	T	IGHMBP2	splice_region_variant&intron_variant	35	168	0.208333	0.2188	0.2	0.2222	0.2	Conflicting_interpretations_of_pathogenicity	Autosomal_recessive_distal_spinal_muscular_atrophy_1|Charcot-Marie-Tooth_disease_axonal_type_2S|Inborn_genetic_diseases	IGHMBP2	intron_variant	NO	0.018
11:128037634:T:C	rs147641822	11	1759628	G	A	CTSD	synonymous_variant	27	168	0.160714	0.9688	0.84	0.6944	0.86	Conflicting_interpretations_of_pathogenicity	Neuronal_ceroid_lipofuscinosis_10|Neuronal_ceroid_lipofuscinosis|Inborn_genetic_diseases|not_specified	CTSD	synonymous_variant	YES	4.582
11:128043585:T:C	rs762076054	11	1753584	G	A	CTSD	synonymous_variant	155	168	0.922619	0.2188	0	0	0.12	Conflicting_interpretations_of_pathogenicity	Neuronal_ceroid_lipofuscinosis|not_provided	CTSD	synonymous_variant	YES	0.698
11:128043585:T:C	rs762076054	11	1753584	G	A	IFITM10	upstream_gene_variant	155	168	0.922619	0.2188	0	0	0.12	Conflicting_interpretations_of_pathogenicity	Neuronal_ceroid_lipofuscinosis|not_provided	CTSD	synonymous_variant	NO	0.698
11:129016746:C:T	rs200072903	11	792368	G	A	CEND1	upstream_gene_variant	129	168	0.767857	0.5938	0.84	0.7222	0.84	Conflicting_interpretations_of_pathogenicity	Early_myoclonic_encephalopathy|Early_infantile_epileptic_encephalopathy_with_suppression_bursts|Inborn_genetic_diseases|not_provided	SLC25A22	synonymous_variant	NO	0.583
11:129016746:C:T	rs200072903	11	792368	G	A	PANO1	upstream_gene_variant	129	168	0.767857	0.5938	0.84	0.7222	0.84	Conflicting_interpretations_of_pathogenicity	Early_myoclonic_encephalopathy|Early_infantile_epileptic_encephalopathy_with_suppression_bursts|Inborn_genetic_diseases|not_provided	SLC25A22	synonymous_variant	NO	0.583
11:129016746:C:T	rs200072903	11	792368	G	A	SLC25A22	synonymous_variant	129	168	0.767857	0.5938	0.84	0.7222	0.84	Conflicting_interpretations_of_pathogenicity	Early_myoclonic_encephalopathy|Early_infantile_epileptic_encephalopathy_with_suppression_bursts|Inborn_genetic_diseases|not_provided	SLC25A22	synonymous_variant	YES	0.583
11:14213693:G:T	rs757899657	11	116836114	G	T	APOA1	missense_variant	2	168	0.0119048	0	0	0	0.04	Conflicting_interpretations_of_pathogenicity	Familial_visceral_amyloidosis,_Ostertag_type|Hypoalphalipoproteinemia,_primary,_1|Cardiovascular_phenotype|not_provided	APOA1	missense_variant	YES	15.44
11:14213693:G:T	rs757899657	11	116836114	G	T	APOC3	downstream_gene_variant	2	168	0.0119048	0	0	0	0.04	Conflicting_interpretations_of_pathogenicity	Familial_visceral_amyloidosis,_Ostertag_type|Hypoalphalipoproteinemia,_primary,_1|Cardiovascular_phenotype|not_provided	APOA1	missense_variant	NO	15.44
11:15553787:C:T	rs200264107	11	118166895	C	T	SCN2B	missense_variant	10	168	0.0595238	0.0313	0.04	0.0833	0.08	Conflicting_interpretations_of_pathogenicity	Atrial_fibrillation,_familial,_14|Cardiovascular_phenotype	SCN2B	missense_variant	YES	0.275
11:16473447:C:T	rs199758476	11	119073336	C	T	VPS11	synonymous_variant	2	168	0.0119048	0	0	0.0556	0	Conflicting_interpretations_of_pathogenicity	not_provided	VPS11	non-coding_transcript_variant,synonymous_variant	YES	7.441
11:16735652:G:A	rs140710522	11	119344669	G	A	C1QTNF5	upstream_gene_variant	6	168	0.0357143	0.1875	0	0	0	Conflicting_interpretations_of_pathogenicity	Retinal_degeneration|Late-onset_retinal_degeneration|Isolated_microphthalmia_5	MFRP	synonymous_variant,5_prime_UTR_variant	NO	0.158
11:16735652:G:A	rs140710522	11	119344669	G	A	MFRP	synonymous_variant	6	168	0.0357143	0.1875	0	0	0	Conflicting_interpretations_of_pathogenicity	Retinal_degeneration|Late-onset_retinal_degeneration|Isolated_microphthalmia_5	MFRP	synonymous_variant,5_prime_UTR_variant	YES	0.158
11:18549956:C:T	rs372087934	11	121145761	T	C	LOC100386926	synonymous_variant	140	168	0.833333	0.0938	0.14	0.3056	0.14	Conflicting_interpretations_of_pathogenicity	Autosomal_dominant_nonsyndromic_hearing_loss_12|Autosomal_recessive_nonsyndromic_hearing_loss_21|not_specified|not_provided	TECTA	synonymous_variant	NO	0.48
11:18562226:C:T	rs33981325	11	121157957	C	T	LOC100386926	synonymous_variant	67	168	0.39881	0.4688	0.52	0.1944	0.38	Conflicting_interpretations_of_pathogenicity	Autosomal_dominant_nonsyndromic_hearing_loss_12|Autosomal_recessive_nonsyndromic_hearing_loss_21|not_specified|not_provided	TECTA	synonymous_variant	NO	5.434
11:18566950:T:C	rs151087951	11	121162240	C	T	LOC100386926	synonymous_variant	89	168	0.529762	0.5938	0.56	0.3056	0.42	Conflicting_interpretations_of_pathogenicity	Autosomal_dominant_nonsyndromic_hearing_loss_12|Autosomal_recessive_nonsyndromic_hearing_loss_21|not_provided	TECTA	synonymous_variant	NO	5.33
11:26317747:C:G	rs71470654	11	128891435	C	G	KCNJ5	5_prime_UTR_variant	2	168	0.0119048	0	0.02	0	0.02	Conflicting_interpretations_of_pathogenicity	Familial_hyperaldosteronism_type_III|not_provided	KCNJ5	5_prime_UTR_variant	YES	3.381
11:26337443:G:A	rs529755922	11	128911283	G	A	KCNJ5	missense_variant	2	168	0.0119048	0	0.04	0	0	Conflicting_interpretations_of_pathogenicity	Long_QT_syndrome|Cardiovascular_phenotype|not_provided	KCNJ5	missense_variant	YES	24.2
1:142649985:C:T	rs142509393	9	37428547	C	T	GRHPR	synonymous_variant	3	168	0.0178571	0.0313	0.04	0	0	Conflicting_interpretations_of_pathogenicity	Primary_hyperoxaluria,_type_II|not_provided|Nephrolithiasis/nephrocalcinosis	GRHPR	synonymous_variant	YES	3.611
1:157313917:C:T	rs371617202	9	110682810	C	T	MUSK	intron_variant	5	168	0.0297619	0	0.04	0	0.06	Conflicting_interpretations_of_pathogenicity	Fetal_akinesia_deformation_sequence_1|Congenital_myasthenic_syndrome_9	MUSK	intron_variant	YES	9.3
11:5776934:C:T	rs1555053873	11	108227635	T	C	ATM	5_prime_UTR_variant	166	168	0.988095	0.0313	0	0	0.02	Conflicting_interpretations_of_pathogenicity	Ataxia-telangiectasia_syndrome|Hereditary_cancer-predisposing_syndrome	ATM	missense_variant	NO	12.92
11:5776934:C:T	rs1555053873	11	108227635	T	C	ATM	missense_variant	166	168	0.988095	0.0313	0	0	0.02	Conflicting_interpretations_of_pathogenicity	Ataxia-telangiectasia_syndrome|Hereditary_cancer-predisposing_syndrome	ATM	missense_variant	YES	12.92
11:5776934:C:T	rs1555053873	11	108227635	T	C	ATM	non_coding_transcript_exon_variant	166	168	0.988095	0.0313	0	0	0.02	Conflicting_interpretations_of_pathogenicity	Ataxia-telangiectasia_syndrome|Hereditary_cancer-predisposing_syndrome	ATM	missense_variant	NO	12.92
11:5796125:T:C	rs1591511595	11	108247131	C	T	ATM	splice_region_variant&intron_variant	91	168	0.541667	0.7188	0.46	0.2778	0.42	Conflicting_interpretations_of_pathogenicity	Ataxia-telangiectasia_syndrome|Hereditary_cancer-predisposing_syndrome	ATM	intron_variant	NO	7.896
11:5796125:T:C	rs1591511595	11	108247131	C	T	ATM	splice_region_variant&intron_variant&non_coding_transcript_variant	91	168	0.541667	0.7188	0.46	0.2778	0.42	Conflicting_interpretations_of_pathogenicity	Ataxia-telangiectasia_syndrome|Hereditary_cancer-predisposing_syndrome	ATM	intron_variant	NO	7.896
11:5802299:A:G	rs876659636	11	108251843	A	G	ATM	non_coding_transcript_exon_variant	4	168	0.0238095	0.0313	0	0.0556	0.02	Conflicting_interpretations_of_pathogenicity	Ataxia-telangiectasia_syndrome|Hereditary_cancer-predisposing_syndrome	ATM	synonymous_variant	NO	9.79
11:5802299:A:G	rs876659636	11	108251843	A	G	ATM	synonymous_variant	4	168	0.0238095	0.0313	0	0.0556	0.02	Conflicting_interpretations_of_pathogenicity	Ataxia-telangiectasia_syndrome|Hereditary_cancer-predisposing_syndrome	ATM	synonymous_variant	YES	9.79
11:5826212:G:A	rs2082310429	11	108282897	A	G	ATM	intron_variant	89	168	0.529762	0.7813	0.5	0.1944	0.44	Conflicting_interpretations_of_pathogenicity	Hereditary_breast_ovarian_cancer_syndrome|Ataxia-telangiectasia_syndrome|Hereditary_cancer-predisposing_syndrome	ATM	intron_variant	YES	1.398
11:5826212:G:A	rs2082310429	11	108282897	A	G	ATM	intron_variant&non_coding_transcript_variant	89	168	0.529762	0.7813	0.5	0.1944	0.44	Conflicting_interpretations_of_pathogenicity	Hereditary_breast_ovarian_cancer_syndrome|Ataxia-telangiectasia_syndrome|Hereditary_cancer-predisposing_syndrome	ATM	intron_variant	NO	1.398
11:5872078:G:T	rs138828590	11	108321391	G	T	ATM	missense_variant	7	168	0.0416667	0.125	0	0	0.06	Conflicting_interpretations_of_pathogenicity	Hereditary_breast_ovarian_cancer_syndrome|Ataxia-telangiectasia_syndrome|Hereditary_cancer-predisposing_syndrome|not_specified|not_provided	ATM	missense_variant,intron_variant	YES	23.7
11:5872078:G:T	rs138828590	11	108321391	G	T	ATM	non_coding_transcript_exon_variant	7	168	0.0416667	0.125	0	0	0.06	Conflicting_interpretations_of_pathogenicity	Hereditary_breast_ovarian_cancer_syndrome|Ataxia-telangiectasia_syndrome|Hereditary_cancer-predisposing_syndrome|not_specified|not_provided	ATM	missense_variant,intron_variant	NO	23.7
11:5872078:G:T	rs138828590	11	108321391	G	T	C11H11orf65	downstream_gene_variant	7	168	0.0416667	0.125	0	0	0.06	Conflicting_interpretations_of_pathogenicity	Hereditary_breast_ovarian_cancer_syndrome|Ataxia-telangiectasia_syndrome|Hereditary_cancer-predisposing_syndrome|not_specified|not_provided	ATM	missense_variant,intron_variant	NO	23.7
11:61694110:G:A	rs201834743	11	77184686	C	T	MYO7A	synonymous_variant	2	168	0.0119048	0.0313	0.02	0	0	Conflicting_interpretations_of_pathogenicity	Usher_syndrome_type_1|Autosomal_recessive_nonsyndromic_hearing_loss_2|Autosomal_dominant_nonsyndromic_hearing_loss_11|not_specified|not_provided	MYO7A	synonymous_variant	YES	5.583
11:61721438:A:G	rs371142158	11	77156956	C	T	MYO7A	synonymous_variant	163	168	0.970238	0.1563	0	0	0	Conflicting_interpretations_of_pathogenicity	Usher_syndrome_type_1|Autosomal_recessive_nonsyndromic_hearing_loss_2|Autosomal_dominant_nonsyndromic_hearing_loss_11|Usher_syndrome_type_1B|not_specified|not_provided	MYO7A	synonymous_variant	YES	0.709
11:61721654:C:T	rs188198404	11	77156738	G	A	MYO7A	synonymous_variant	1	168	0.00595238	0	0	0.0278	0	Conflicting_interpretations_of_pathogenicity	Usher_syndrome_type_1|Autosomal_recessive_nonsyndromic_hearing_loss_2|Autosomal_dominant_nonsyndromic_hearing_loss_11|Usher_syndrome_type_1B|not_provided	MYO7A	synonymous_variant	YES	0.116
1:167049081:C:T	rs587783396	9	120400745	C	T	CDK5RAP2	synonymous_variant	3	168	0.0178571	0	0.04	0.0278	0	Conflicting_interpretations_of_pathogenicity	Microcephaly_3,_primary,_autosomal_recessive|not_specified	CDK5RAP2	non-coding_transcript_variant,synonymous_variant	YES	0.159
11:69988907:G:A	rs1464825418	11	6391623	G	A	APBB1	downstream_gene_variant	4	168	0.0238095	0.125	0	0	0	Conflicting_interpretations_of_pathogenicity	Niemann-Pick_disease,_type_A|Niemann-Pick_disease,_type_B|not_provided	SMPD1	non-coding_transcript_variant,synonymous_variant,5_prime_UTR_variant	NO	0.08
11:69988907:G:A	rs1464825418	11	6391623	G	A	SMPD1	synonymous_variant	4	168	0.0238095	0.125	0	0	0	Conflicting_interpretations_of_pathogenicity	Niemann-Pick_disease,_type_A|Niemann-Pick_disease,_type_B|not_provided	SMPD1	non-coding_transcript_variant,synonymous_variant,5_prime_UTR_variant	YES	0.08
1:175447852:G:A	rs779759134	9	128591549	G	A	SPTAN1	missense_variant	69	168	0.410714	0.3125	0.38	0.4167	0.5	Conflicting_interpretations_of_pathogenicity	Early_infantile_epileptic_encephalopathy_with_suppression_bursts|not_provided	SPTAN1	missense_variant	YES	19.54
1:177978771:C:T	rs373660982	9	131069730	C	T	LAMC3	synonymous_variant	1	168	0.00595238	0	0	0	0.02	Conflicting_interpretations_of_pathogenicity	not_specified|not_provided	LAMC3	synonymous_variant	YES	3.43
1:17857713:A:G	rs143667470	13	102862408	G	A	ERCC5	missense_variant	45	168	0.267857	0.75	0.72	0.8611	0.64	Conflicting_interpretations_of_pathogenicity	Xeroderma_pigmentosum,_group_G|Hereditary_cancer-predisposing_syndrome|not_specified|not_provided	ERCC5	missense_variant	YES	0.001
11:81291633:G:A	rs1207446214	11	17396940	A	G	ABCC8	non_coding_transcript_exon_variant	156	168	0.928571	0	0.12	0	0.12	Conflicting_interpretations_of_pathogenicity	Maturity_onset_diabetes_mellitus_in_young|Transitory_neonatal_diabetes_mellitus|not_provided	ABCC8	non-coding_transcript_variant,synonymous_variant	NO	0.073
11:81291633:G:A	rs1207446214	11	17396940	A	G	ABCC8	synonymous_variant	156	168	0.928571	0	0.12	0	0.12	Conflicting_interpretations_of_pathogenicity	Maturity_onset_diabetes_mellitus_in_young|Transitory_neonatal_diabetes_mellitus|not_provided	ABCC8	non-coding_transcript_variant,synonymous_variant	YES	0.073
11:81324155:G:A	rs775087598	11	17428555	G	A	ABCC8	intron_variant	30	168	0.178571	0.0625	0.14	0.1667	0.3	Conflicting_interpretations_of_pathogenicity	Maturity_onset_diabetes_mellitus_in_young|Transitory_neonatal_diabetes_mellitus|not_provided	ABCC8	intron_variant	YES	1.058
11:81324155:G:A	rs775087598	11	17428555	G	A	ABCC8	intron_variant&non_coding_transcript_variant	30	168	0.178571	0.0625	0.14	0.1667	0.3	Conflicting_interpretations_of_pathogenicity	Maturity_onset_diabetes_mellitus_in_young|Transitory_neonatal_diabetes_mellitus|not_provided	ABCC8	intron_variant	NO	1.058
11:81357434:G:A	rs535141079	11	17461670	G	A	ABCC8	non_coding_transcript_exon_variant	4	168	0.0238095	0.125	0	0	0	Conflicting_interpretations_of_pathogenicity	Maturity_onset_diabetes_mellitus_in_young|Transitory_neonatal_diabetes_mellitus|not_provided	ABCC8	non-coding_transcript_variant,synonymous_variant	NO	7.743
11:81357434:G:A	rs535141079	11	17461670	G	A	ABCC8	synonymous_variant	4	168	0.0238095	0.125	0	0	0	Conflicting_interpretations_of_pathogenicity	Maturity_onset_diabetes_mellitus_in_young|Transitory_neonatal_diabetes_mellitus|not_provided	ABCC8	non-coding_transcript_variant,synonymous_variant	YES	7.743
11:81357434:G:A	rs535141079	11	17461670	G	A	ABCC8	upstream_gene_variant	4	168	0.0238095	0.125	0	0	0	Conflicting_interpretations_of_pathogenicity	Maturity_onset_diabetes_mellitus_in_young|Transitory_neonatal_diabetes_mellitus|not_provided	ABCC8	non-coding_transcript_variant,synonymous_variant	NO	7.743
1:181578773:C:T	rs199895142	9	134785992	C	T	COL5A1	splice_region_variant&intron_variant	37	168	0.220238	0.0625	0.38	0.2222	0.16	Conflicting_interpretations_of_pathogenicity	Ehlers-Danlos_syndrome,_classic_type,_1|not_specified|not_provided	COL5A1	intron_variant	NO	5.69
11:85931151:C:T	rs767479331	11	22272893	C	T	ANO5	synonymous_variant	10	168	0.0595238	0.0938	0.1	0.0278	0.02	Conflicting_interpretations_of_pathogenicity	Gnathodiaphyseal_dysplasia|Miyoshi_myopathy|Autosomal_recessive_limb-girdle_muscular_dystrophy_type_2L|not_specified|ANO5-Related_Muscle_Diseases|Limb-Girdle_Muscular_Dystrophy,_Recessive	ANO5	synonymous_variant	YES	0.417
1:190979304:C:T	rs727504162	22	23793696	G	A	LOC103791252	intron_variant	2	168	0.0119048	0	0.02	0	0.02	Conflicting_interpretations_of_pathogenicity	not_provided	SMARCB1	intron_variant	NO	0.127
1:190979304:C:T	rs727504162	22	23793696	G	A	SMARCB1	splice_region_variant&intron_variant	2	168	0.0119048	0	0.02	0	0.02	Conflicting_interpretations_of_pathogenicity	not_provided	SMARCB1	intron_variant	NO	0.127
11:9532548:G:A	rs575262156	11	112088940	G	A	LOC100413592	upstream_gene_variant	125	168	0.744048	0.8438	0.74	0.8611	0.6	Conflicting_interpretations_of_pathogenicity	Pheochromocytoma|Carney-Stratakis_syndrome|Cowden_syndrome_3|Hereditary_cancer-predisposing_syndrome|Paragangliomas_with_sensorineural_hearing_loss|not_provided	SDHD	non-coding_transcript_variant,synonymous_variant,intron_variant	NO	7.705
11:9532548:G:A	rs575262156	11	112088940	G	A	NKAPD1	downstream_gene_variant	125	168	0.744048	0.8438	0.74	0.8611	0.6	Conflicting_interpretations_of_pathogenicity	Pheochromocytoma|Carney-Stratakis_syndrome|Cowden_syndrome_3|Hereditary_cancer-predisposing_syndrome|Paragangliomas_with_sensorineural_hearing_loss|not_provided	SDHD	non-coding_transcript_variant,synonymous_variant,intron_variant	NO	7.705
11:9532548:G:A	rs575262156	11	112088940	G	A	SDHD	intron_variant	125	168	0.744048	0.8438	0.74	0.8611	0.6	Conflicting_interpretations_of_pathogenicity	Pheochromocytoma|Carney-Stratakis_syndrome|Cowden_syndrome_3|Hereditary_cancer-predisposing_syndrome|Paragangliomas_with_sensorineural_hearing_loss|not_provided	SDHD	non-coding_transcript_variant,synonymous_variant,intron_variant	YES	7.705
11:9532548:G:A	rs575262156	11	112088940	G	A	SDHD	synonymous_variant	125	168	0.744048	0.8438	0.74	0.8611	0.6	Conflicting_interpretations_of_pathogenicity	Pheochromocytoma|Carney-Stratakis_syndrome|Cowden_syndrome_3|Hereditary_cancer-predisposing_syndrome|Paragangliomas_with_sensorineural_hearing_loss|not_provided	SDHD	non-coding_transcript_variant,synonymous_variant,intron_variant	YES	7.705
1:205568847:A:G	rs768359816	22	36292025	G	A	LOC118147168	upstream_gene_variant	25	168	0.14881	0.75	0.84	0.8611	0.92	Conflicting_interpretations_of_pathogenicity	Autosomal_dominant_nonsyndromic_hearing_loss_17|MYH9-related_disorder	MYH9	synonymous_variant	NO	4.892
1:205568847:A:G	rs768359816	22	36292025	G	A	MYH9	synonymous_variant	25	168	0.14881	0.75	0.84	0.8611	0.92	Conflicting_interpretations_of_pathogenicity	Autosomal_dominant_nonsyndromic_hearing_loss_17|MYH9-related_disorder	MYH9	synonymous_variant	YES	4.892
1:207449857:C:T	rs147455037	22	38113560	C	T	PLA2G6	intron_variant	2	168	0.0119048	0	0	0.0556	0	Conflicting_interpretations_of_pathogenicity	Abnormality_of_brain_morphology|Infantile_neuroaxonal_dystrophy|not_provided	PLA2G6	missense_variant	NO	29.1
1:207449857:C:T	rs147455037	22	38113560	C	T	PLA2G6	missense_variant	2	168	0.0119048	0	0	0.0556	0	Conflicting_interpretations_of_pathogenicity	Abnormality_of_brain_morphology|Infantile_neuroaxonal_dystrophy|not_provided	PLA2G6	missense_variant	YES	29.1
1:207458509:C:T	rs200599704	22	38120776	C	T	PLA2G6	synonymous_variant	1	168	0.00595238	0	0	0	0.02	Conflicting_interpretations_of_pathogenicity	Iron_accumulation_in_brain|PLA2G6-associated_neurodegeneration|Infantile_neuroaxonal_dystrophy|not_provided	PLA2G6	synonymous_variant	YES	0.093
1:207464643:G:A	rs199636953	22	38128349	G	A	PLA2G6	intron_variant	17	168	0.10119	0	0.26	0.0556	0.04	Conflicting_interpretations_of_pathogenicity	Infantile_neuroaxonal_dystrophy|not_provided	PLA2G6	missense_variant,intron_variant	YES	5.321
1:207464643:G:A	rs199636953	22	38128349	G	A	PLA2G6	missense_variant	17	168	0.10119	0	0.26	0.0556	0.04	Conflicting_interpretations_of_pathogenicity	Infantile_neuroaxonal_dystrophy|not_provided	PLA2G6	missense_variant,intron_variant	YES	5.321
12:100908951:T:C	rs112525060	10	110600504	T	C	SMC3	synonymous_variant	8	168	0.047619	0	0.08	0	0.08	Conflicting_interpretations_of_pathogenicity	Cornelia_de_Lange_syndrome_3|Inborn_genetic_diseases|not_provided	SMC3	synonymous_variant	YES	1.281
12:11327267:G:A	rs377410503	16	15721065	G	A	MYH11	intron_variant	9	168	0.0535714	0.0625	0.12	0	0.02	Conflicting_interpretations_of_pathogenicity	Connective_tissue_disorder|Aortic_aneurysm,_familial_thoracic_4|Familial_thoracic_aortic_aneurysm_and_aortic_dissection|not_specified|not_provided	MYH11	intron_variant	YES	1.099
12:11327267:G:A	rs377410503	16	15721065	G	A	NDE1	intron_variant	9	168	0.0535714	0.0625	0.12	0	0.02	Conflicting_interpretations_of_pathogenicity	Connective_tissue_disorder|Aortic_aneurysm,_familial_thoracic_4|Familial_thoracic_aortic_aneurysm_and_aortic_dissection|not_specified|not_provided	MYH11	intron_variant	NO	1.099
12:113875554:C:T	rs150619709	10	123043159	C	T	ACADSB	synonymous_variant	44	168	0.261905	0.3438	0.12	0.3611	0.28	Conflicting_interpretations_of_pathogenicity	Deficiency_of_2-methylbutyryl-CoA_dehydrogenase	ACADSB	synonymous_variant	YES	9.283
12:124255270:G:A	rs372408822	10	133373326	G	A	ECHS1	missense_variant	34	168	0.202381	0.2813	0.22	0.0556	0.24	Conflicting_interpretations_of_pathogenicity	Mitochondrial_short-chain_Enoyl-Coa_hydratase_1_deficiency|not_provided	ECHS1	missense_variant	YES	21.2
12:124255270:G:A	rs372408822	10	133373326	G	A	LOC118146531	upstream_gene_variant	34	168	0.202381	0.2813	0.22	0.0556	0.24	Conflicting_interpretations_of_pathogenicity	Mitochondrial_short-chain_Enoyl-Coa_hydratase_1_deficiency|not_provided	ECHS1	missense_variant	NO	21.2
12:1490829:T:C	rs371035809	16	1461393	C	T	CLCN7	intron_variant	93	168	0.553571	0.8125	0.4	0.3611	0.32	Conflicting_interpretations_of_pathogenicity	Osteopetrosis|not_provided	CLCN7	intron_variant	YES	1.464
12:1490829:T:C	rs371035809	16	1461393	C	T	CLCN7	intron_variant&non_coding_transcript_variant	93	168	0.553571	0.8125	0.4	0.3611	0.32	Conflicting_interpretations_of_pathogenicity	Osteopetrosis|not_provided	CLCN7	intron_variant	NO	1.464
12:15238036:A:G	rs758166691	16	11556596	C	T	LITAF	synonymous_variant	126	168	0.75	0.4063	0.3	0.1111	0.2	Conflicting_interpretations_of_pathogenicity	Charcot-Marie-Tooth_disease_type_1C|Inborn_genetic_diseases	LITAF	non-coding_transcript_variant,synonymous_variant	YES	0.511
12:1630948:G:A	rs140403660	16	1607270	G	A	CRAMP1	upstream_gene_variant	6	168	0.0357143	0.125	0.04	0	0	Conflicting_interpretations_of_pathogenicity	Saldino-Mainzer_syndrome|not_specified	IFT140	5_prime_UTR_variant	NO	4.452
12:1630948:G:A	rs140403660	16	1607270	G	A	IFT140	5_prime_UTR_variant	6	168	0.0357143	0.125	0.04	0	0	Conflicting_interpretations_of_pathogenicity	Saldino-Mainzer_syndrome|not_specified	IFT140	5_prime_UTR_variant	YES	4.452
12:1630948:G:A	rs140403660	16	1607270	G	A	IFT140	upstream_gene_variant	6	168	0.0357143	0.125	0.04	0	0	Conflicting_interpretations_of_pathogenicity	Saldino-Mainzer_syndrome|not_specified	IFT140	5_prime_UTR_variant	NO	4.452
1:217402864:G:A	rs200824422	22	50218478	G	A	SELENOO	downstream_gene_variant	5	168	0.0297619	0	0.02	0	0.08	Conflicting_interpretations_of_pathogenicity	not_specified|not_provided	TUBGCP6	intron_variant	NO	0.587
1:217402864:G:A	rs200824422	22	50218478	G	A	TUBGCP6	intron_variant	5	168	0.0297619	0	0.02	0	0.08	Conflicting_interpretations_of_pathogenicity	not_specified|not_provided	TUBGCP6	intron_variant	YES	0.587
1:217688911:A:G	rs375345044	22	50523689	G	A	NCAPH2	3_prime_UTR_variant	165	168	0.982143	0	0.02	0	0.04	Conflicting_interpretations_of_pathogenicity	Cytochrome-c_oxidase_deficiency_disease|Cardioencephalomyopathy,_fatal_infantile,_due_to_cytochrome_c_oxidase_deficiency_1|not_provided	TYMP	synonymous_variant,3_prime_UTR_variant	NO	0.032
1:217688911:A:G	rs375345044	22	50523689	G	A	NCAPH2	downstream_gene_variant	165	168	0.982143	0	0.02	0	0.04	Conflicting_interpretations_of_pathogenicity	Cytochrome-c_oxidase_deficiency_disease|Cardioencephalomyopathy,_fatal_infantile,_due_to_cytochrome_c_oxidase_deficiency_1|not_provided	TYMP	synonymous_variant,3_prime_UTR_variant	NO	0.032
1:217688911:A:G	rs375345044	22	50523689	G	A	NCAPH2	intron_variant	165	168	0.982143	0	0.02	0	0.04	Conflicting_interpretations_of_pathogenicity	Cytochrome-c_oxidase_deficiency_disease|Cardioencephalomyopathy,_fatal_infantile,_due_to_cytochrome_c_oxidase_deficiency_1|not_provided	TYMP	synonymous_variant,3_prime_UTR_variant	NO	0.032
1:217688911:A:G	rs375345044	22	50523689	G	A	SCO2	synonymous_variant	165	168	0.982143	0	0.02	0	0.04	Conflicting_interpretations_of_pathogenicity	Cytochrome-c_oxidase_deficiency_disease|Cardioencephalomyopathy,_fatal_infantile,_due_to_cytochrome_c_oxidase_deficiency_1|not_provided	TYMP	synonymous_variant,3_prime_UTR_variant	NO	0.032
1:217688911:A:G	rs375345044	22	50523689	G	A	TYMP	downstream_gene_variant	165	168	0.982143	0	0.02	0	0.04	Conflicting_interpretations_of_pathogenicity	Cytochrome-c_oxidase_deficiency_disease|Cardioencephalomyopathy,_fatal_infantile,_due_to_cytochrome_c_oxidase_deficiency_1|not_provided	TYMP	synonymous_variant,3_prime_UTR_variant	NO	0.032
12:2088606:G:A	rs749163517	16	2498379	C	T	TBC1D24	synonymous_variant	1	168	0.00595238	0	0.02	0	0	Conflicting_interpretations_of_pathogenicity	Developmental_and_epileptic_encephalopathy,_1|Familial_infantile_myoclonic_epilepsy|Autosomal_dominant_nonsyndromic_hearing_loss_65|Inborn_genetic_diseases|not_specified|Caused_by_mutation_in_the_TBC1_domain_family,_member_24|not_provided	TBC1D24	synonymous_variant	YES	0.503
12:21658489:C:T	rs13306633	16	23371423	C	T	SCNN1B	synonymous_variant	66	168	0.392857	0.5938	0.42	0.4167	0.22	Conflicting_interpretations_of_pathogenicity	Bronchiectasis_with_or_without_elevated_sweat_chloride_1|Autosomal_recessive_pseudohypoaldosteronism_type_1|Liddle_syndrome_1	SCNN1B	synonymous_variant	YES	0.6
12:21665546:C:T	rs193211556	16	23378720	C	T	COG7	downstream_gene_variant	34	168	0.202381	0.2188	0.32	0.1944	0.08	Conflicting_interpretations_of_pathogenicity	Bronchiectasis_with_or_without_elevated_sweat_chloride_1|Autosomal_recessive_pseudohypoaldosteronism_type_1|Liddle_syndrome_1	SCNN1B	synonymous_variant	NO	8.209
12:21665546:C:T	rs193211556	16	23378720	C	T	SCNN1B	synonymous_variant	34	168	0.202381	0.2188	0.32	0.1944	0.08	Conflicting_interpretations_of_pathogenicity	Bronchiectasis_with_or_without_elevated_sweat_chloride_1|Autosomal_recessive_pseudohypoaldosteronism_type_1|Liddle_syndrome_1	SCNN1B	synonymous_variant	YES	8.209
12:21908741:C:T	rs148026749	16	23629825	C	T	PALB2	missense_variant	13	168	0.077381	0.0313	0.1	0.0556	0.1	Conflicting_interpretations_of_pathogenicity	Hereditary_cancer-predisposing_syndrome|Familial_cancer_of_breast|not_provided	PALB2	missense_variant	YES	0.009
12:21908741:C:T	rs148026749	16	23629825	C	T	PALB2	non_coding_transcript_exon_variant	13	168	0.077381	0.0313	0.1	0.0556	0.1	Conflicting_interpretations_of_pathogenicity	Hereditary_cancer-predisposing_syndrome|Familial_cancer_of_breast|not_provided	PALB2	missense_variant	NO	0.009
12:21909373:C:T	rs144617793	16	23630457	C	T	PALB2	missense_variant	19	168	0.113095	0.0313	0.1	0.2222	0.1	Conflicting_interpretations_of_pathogenicity	Hereditary_cancer-predisposing_syndrome|Familial_cancer_of_breast|not_specified|not_provided	PALB2	missense_variant	YES	0.04
12:21909373:C:T	rs144617793	16	23630457	C	T	PALB2	non_coding_transcript_exon_variant	19	168	0.113095	0.0313	0.1	0.2222	0.1	Conflicting_interpretations_of_pathogenicity	Hereditary_cancer-predisposing_syndrome|Familial_cancer_of_breast|not_specified|not_provided	PALB2	missense_variant	NO	0.04
12:21919959:C:G	rs190626072	16	23641103	C	G	DCTN5	upstream_gene_variant	26	168	0.154762	0.1563	0.14	0.1944	0.14	Conflicting_interpretations_of_pathogenicity	Hereditary_cancer-predisposing_syndrome|Familial_cancer_of_breast|not_specified|not_provided	PALB2	intron_variant	NO	14.53
12:21919959:C:G	rs190626072	16	23641103	C	G	LOC118146640	upstream_gene_variant	26	168	0.154762	0.1563	0.14	0.1944	0.14	Conflicting_interpretations_of_pathogenicity	Hereditary_cancer-predisposing_syndrome|Familial_cancer_of_breast|not_specified|not_provided	PALB2	intron_variant	NO	14.53
12:21919959:C:G	rs190626072	16	23641103	C	G	PALB2	splice_region_variant&intron_variant	26	168	0.154762	0.1563	0.14	0.1944	0.14	Conflicting_interpretations_of_pathogenicity	Hereditary_cancer-predisposing_syndrome|Familial_cancer_of_breast|not_specified|not_provided	PALB2	intron_variant	NO	14.53
12:21919959:C:G	rs190626072	16	23641103	C	G	PALB2	splice_region_variant&intron_variant&non_coding_transcript_variant	26	168	0.154762	0.1563	0.14	0.1944	0.14	Conflicting_interpretations_of_pathogenicity	Hereditary_cancer-predisposing_syndrome|Familial_cancer_of_breast|not_specified|not_provided	PALB2	intron_variant	NO	14.53
12:2251882:C:T	rs45620539	16	2295664	G	A	ABCA3	synonymous_variant	38	168	0.22619	0.1875	0.14	0.2222	0.34	Conflicting_interpretations_of_pathogenicity	Interstitial_lung_disease_due_to_ABCA3_deficiency|not_provided	ABCA3	synonymous_variant	YES	0.601
12:2462634:C:T	rs368666554	16	2080288	G	A	TSC2	missense_variant	7	168	0.0416667	0.0313	0.02	0.0556	0.06	Conflicting_interpretations_of_pathogenicity	Tuberous_sclerosis_2|Hereditary_cancer-predisposing_syndrome|not_provided	TSC2	missense_variant	YES	0.164
12:2463339:A:G	rs150126331	16	2079566	C	T	TSC2	synonymous_variant	116	168	0.690476	0.5	0.24	0.4722	0.14	Conflicting_interpretations_of_pathogenicity	Tuberous_sclerosis_syndrome|Tuberous_sclerosis_2|Hereditary_cancer-predisposing_syndrome|not_provided	TSC2	synonymous_variant	YES	0.11
12:2483681:G:A	rs761704292	16	2055496	C	T	TSC2	synonymous_variant	2	168	0.0119048	0	0.04	0	0	Conflicting_interpretations_of_pathogenicity	Tuberous_sclerosis_2|Hereditary_cancer-predisposing_syndrome|not_provided	TSC2	synonymous_variant,intron_variant	YES	2.314
12:3617360:G:A	rs148539895	16	3728603	G	A	CREBBP	synonymous_variant	1	168	0.00595238	0.0313	0	0	0	Conflicting_interpretations_of_pathogenicity	Rubinstein-Taybi_syndrome|not_provided	CREBBP	synonymous_variant	YES	0.079
12:39208752:G:A	rs148125234	10	84199091	C	T	CDHR1	synonymous_variant	84	168	0.5	0.5	0.5	0.5	0.5	Conflicting_interpretations_of_pathogenicity	Cone-Rod_Dystrophy,_Recessive|not_provided	CDHR1	synonymous_variant	YES	9.587
12:39208752:G:A	rs148125234	10	84199091	C	T	LOC103790774	intron_variant&non_coding_transcript_variant	84	168	0.5	0.5	0.5	0.5	0.5	Conflicting_interpretations_of_pathogenicity	Cone-Rod_Dystrophy,_Recessive|not_provided	CDHR1	synonymous_variant	NO	9.587
12:50385719:T:C	rs139309224	10	77183518	G	A	KCNMA1	synonymous_variant	140	168	0.833333	0.3438	0.26	0.0556	0.04	Conflicting_interpretations_of_pathogenicity	Generalized_epilepsy-paroxysmal_dyskinesia_syndrome|not_provided	KCNMA1	synonymous_variant	YES	0.512
12:53474436:G:A	rs138619320	10	74114300	C	T	VCL	synonymous_variant	7	168	0.0416667	0.0313	0.08	0	0.04	Conflicting_interpretations_of_pathogenicity	Dilated_cardiomyopathy_1W|not_specified|Cardiovascular_phenotype|not_provided	VCL	synonymous_variant	YES	7.657
12:53476825:G:A	rs532645343	10	74111901	C	T	VCL	intron_variant	22	168	0.130952	0.1875	0.1	0.1111	0.14	Conflicting_interpretations_of_pathogenicity	Dilated_cardiomyopathy_1W|not_specified	VCL	intron_variant	YES	17.45
12:53476825:G:A	rs532645343	10	74111901	C	T	VCL	splice_region_variant&intron_variant	22	168	0.130952	0.1875	0.1	0.1111	0.14	Conflicting_interpretations_of_pathogenicity	Dilated_cardiomyopathy_1W|not_specified	VCL	intron_variant	NO	17.45
12:55736534:C:T	rs142788731	10	71793357	G	A	CDH23	downstream_gene_variant	23	168	0.136905	0.125	0.2	0.0833	0.12	Conflicting_interpretations_of_pathogenicity	Usher_syndrome_type_1|Usher_syndrome_type_1D|Autosomal_recessive_nonsyndromic_hearing_loss_12|not_specified|not_provided	CDH23	synonymous_variant	NO	0.361
12:55736534:C:T	rs142788731	10	71793357	G	A	CDH23	synonymous_variant	23	168	0.136905	0.125	0.2	0.0833	0.12	Conflicting_interpretations_of_pathogenicity	Usher_syndrome_type_1|Usher_syndrome_type_1D|Autosomal_recessive_nonsyndromic_hearing_loss_12|not_specified|not_provided	CDH23	synonymous_variant	YES	0.361
12:55798900:C:T	rs111033488	10	71730508	G	A	CDH23	missense_variant	1	168	0.00595238	0	0	0.0278	0	Conflicting_interpretations_of_pathogenicity	Usher_syndrome_type_1|Usher_syndrome_type_1D|Autosomal_recessive_nonsyndromic_hearing_loss_12|not_specified|not_provided	CDH23	missense_variant,intron_variant	YES	22.5
12:55958709:A:G	rs143341423	10	71566822	C	T	CDH23	synonymous_variant	164	168	0.97619	0	0.08	0	0	Conflicting_interpretations_of_pathogenicity	Usher_syndrome_type_1|Usher_syndrome_type_1D|Autosomal_recessive_nonsyndromic_hearing_loss_12|not_specified|not_provided	CDH23	synonymous_variant	YES	8.75
12:56169510:G:A	rs773321774	10	71351739	C	T	SLC29A3	missense_variant	9	168	0.0535714	0	0.18	0	0	Conflicting_interpretations_of_pathogenicity	H_syndrome|not_provided	SLC29A3	non-coding_transcript_variant,synonymous_variant	NO	0.159
12:56169510:G:A	rs773321774	10	71351739	C	T	SLC29A3	synonymous_variant	9	168	0.0535714	0	0.18	0	0	Conflicting_interpretations_of_pathogenicity	H_syndrome|not_provided	SLC29A3	non-coding_transcript_variant,synonymous_variant	YES	0.159
12:61681833:G:A	.	10	66103197	C	T	CTNNA3	missense_variant	3	168	0.0178571	0.0313	0.04	0	0	Conflicting_interpretations_of_pathogenicity	Arrhythmogenic_right_ventricular_dysplasia_13|Inborn_genetic_diseases	CTNNA3	missense_variant	YES	19.51
12:67618204:G:A	rs200791367	10	60196253	C	T	ANK3	intron_variant	16	168	0.0952381	0.0313	0.02	0.25	0.1	Conflicting_interpretations_of_pathogenicity	not_specified|not_provided	ANK3	intron_variant	YES	19.05
12:758301:T:C	rs752077571	16	724716	C	T	ANTKMT	downstream_gene_variant	51	168	0.303571	0.75	0.82	0.7222	0.52	Conflicting_interpretations_of_pathogenicity	Congenital_myopathy_with_internal_nuclei_and_atypical_cores|not_specified	CCDC78	missense_variant,non-coding_transcript_variant,intron_variant	NO	1.797
12:758301:T:C	rs752077571	16	724716	C	T	CCDC78	missense_variant	51	168	0.303571	0.75	0.82	0.7222	0.52	Conflicting_interpretations_of_pathogenicity	Congenital_myopathy_with_internal_nuclei_and_atypical_cores|not_specified	CCDC78	missense_variant,non-coding_transcript_variant,intron_variant	YES	1.797
12:758301:T:C	rs752077571	16	724716	C	T	CIAO3	downstream_gene_variant	51	168	0.303571	0.75	0.82	0.7222	0.52	Conflicting_interpretations_of_pathogenicity	Congenital_myopathy_with_internal_nuclei_and_atypical_cores|not_specified	CCDC78	missense_variant,non-coding_transcript_variant,intron_variant	NO	1.797
12:758301:T:C	rs752077571	16	724716	C	T	HAGHL	upstream_gene_variant	51	168	0.303571	0.75	0.82	0.7222	0.52	Conflicting_interpretations_of_pathogenicity	Congenital_myopathy_with_internal_nuclei_and_atypical_cores|not_specified	CCDC78	missense_variant,non-coding_transcript_variant,intron_variant	NO	1.797
12:79209213:A:G	rs371133960	10	89228286	G	A	LIPA	synonymous_variant	156	168	0.928571	0.0938	0.12	0.0833	0	Conflicting_interpretations_of_pathogenicity	Lysosomal_acid_lipase_deficiency|Wolman_disease|Cardiovascular_phenotype|not_provided	LIPA	synonymous_variant,5_prime_UTR_variant	YES	0.95
12:8857430:C:T	rs376412367	16	8813064	C	T	PMM2	non_coding_transcript_exon_variant	6	168	0.0357143	0.0313	0.04	0	0.06	Conflicting_interpretations_of_pathogenicity	PMM2-congenital_disorder_of_glycosylation|not_specified	PMM2	synonymous_variant	NO	5.874
12:8857430:C:T	rs376412367	16	8813064	C	T	PMM2	synonymous_variant	6	168	0.0357143	0.0313	0.04	0	0.06	Conflicting_interpretations_of_pathogenicity	PMM2-congenital_disorder_of_glycosylation|not_specified	PMM2	synonymous_variant	YES	5.874
13:16255161:A:G	rs763299873	8	22197251	C	T	BMP1	synonymous_variant	132	168	0.785714	0.4688	0.18	0.1667	0.12	Conflicting_interpretations_of_pathogenicity	Osteogenesis_imperfecta_type_13|not_provided	BMP1	non-coding_transcript_variant,synonymous_variant	YES	0.727
13:29302758:G:A	rs767115441	8	31167074	G	A	WRN	synonymous_variant	70	168	0.416667	0.4063	0.42	0.3056	0.5	Conflicting_interpretations_of_pathogenicity	Werner_syndrome|not_provided	WRN	synonymous_variant	YES	0.299
13:36178940:A:G	rs557754125	8	38417297	G	A	FGFR1	intron_variant	20	168	0.119048	0.9688	0.9	0.8611	0.82	Conflicting_interpretations_of_pathogenicity	Pfeiffer_syndrome|Hypogonadotropic_hypogonadism_2_with_or_without_anosmia|not_provided	FGFR1	intron_variant	YES	1.682
13:36178940:A:G	rs557754125	8	38417297	G	A	LETM2	downstream_gene_variant	20	168	0.119048	0.9688	0.9	0.8611	0.82	Conflicting_interpretations_of_pathogenicity	Pfeiffer_syndrome|Hypogonadotropic_hypogonadism_2_with_or_without_anosmia|not_provided	FGFR1	intron_variant	NO	1.682
13:57059282:G:A	rs201069969	18	2706361	C	T	SMCHD1	splice_region_variant&intron_variant	17	168	0.10119	0.1563	0.12	0	0.12	Conflicting_interpretations_of_pathogenicity	Facioscapulohumeral_muscular_dystrophy_2|not_specified|not_provided	SMCHD1	intron_variant	NO	11.26
13:57059282:G:A	rs201069969	18	2706361	C	T	SMCHD1	splice_region_variant&intron_variant&non_coding_transcript_variant	17	168	0.10119	0.1563	0.12	0	0.12	Conflicting_interpretations_of_pathogenicity	Facioscapulohumeral_muscular_dystrophy_2|not_specified|not_provided	SMCHD1	intron_variant	NO	11.26
13:62760112:G:C	rs776389852	18	23544334	G	C	NPC1	intron_variant	9	168	0.0535714	0.0313	0.1	0.0556	0.02	Conflicting_interpretations_of_pathogenicity	Niemann-Pick_disease,_type_C1	NPC1	intron_variant	YES	0.857
13:62769549:G:A	rs148078801	18	23554832	G	A	NPC1	synonymous_variant	2	168	0.0119048	0	0.02	0.0278	0	Conflicting_interpretations_of_pathogenicity	Niemann-Pick_disease,_type_C1|not_provided	NPC1	synonymous_variant	YES	0.942
[truncated: 6,088 more rows]

## Sheet: Table S9. Neuro Genes SNVs
Table S9. Neuro Genes SNVs
[truncated: 283 more rows]

## Sheet: Table S10. Neuro Genes Indels
Table S10. Neuro Genes Indels
[truncated: 12 more rows]

[truncated: 3 more sheets: Table S11. Alzheimer's SNVs, Table S12. Alzheimer's Indels, Table S13. Twinning Genes]
